# Supplementary material for: CyAbrB2 is a nucleoid-associated protein in Synechocystis controlling hydrogenase expression during fermentation
Source: eLife. 2024 Sep 2;13:RP94245. doi: 10.7554/eLife.94245 (PMC11368403; doi:10.7554/eLife.94245)
Supplement: Supplementary file 1. — (a) Oligonucleotides used in this study. (b) Numbers and percentages of NGS reads passed the processes. (c–e) Log2FC, LogCPM, LR, p-value, and false discovery rate (FDR) calculated by edgeR lrt method. (c) Processed data from time-course transcriptome for GT strain. (d) Processed data from the comparison between GT and sigE∆ strain in each timepoints. (e) Processed data from the comparison between GT and cyabrb2∆ strain in each timepoints. (f) List of SigE binding summit in the aerobic condition from ChIP-seq data. (g) List of SigE binding summit in the microoxic condition from ChIP-seq data. (h) List of SigA binding summit in the aerobic condition from ChIP-seq data. (i) List of SigA binding summit in the microoxic condition from ChIP-seq data. (j) List of cyAbrB2 binding region in the aerobic condition from ChIP-seq data. (k) List of cyAbrB2 binding region in the microoxic condition from ChIP-seq data. (l) List of cyAbrB1 binding region in the aerobic condition from ChIP-seq data. (m) Raw result of gene set enrichment analysis of time-course transcriptome (vs the aerobic condition). [file elife-94245-supp1.xlsx]

## Sheet: a
supplementary file 1a: oligonucleotides used in this study
Oligonucleotides ID		sequence
qPCR_hoxF_F	Figure 2-figure supplement 1	GTCATCTGCAATGCTGACGAA
qPCR_hoxF_R	Figure 2-figure supplement 1	CCAACACACTGCGGTCCAT
qPCR_hoxH_F	Figure 2-figure supplement 1	TCCCGTTACCCGGATTGA
qPCR_hoxH_R	Figure 2-figure supplement 1	GCCCTGGTCGTTGAGGAAA
qPCR_nifJ_sll0741_F	Figure 2-figure supplement 1	GATTCGGGGCAAAGTTTACG
qPCR_nifJ_sll0741_R	Figure 2-figure supplement 1	TACCTGGATGGTGAACTTAG
qPCR_sll0744_F	Figure 2-figure supplement 1	GCAGCTTAAATGGTTCTACC
qPCR_sll0744_R	Figure 2-figure supplement 1	CCAAATCTGTGGGTACGTAG
qPCR_nrpB_F	Figure 2-figure supplement 1	AAAGGGTAAGGGTGCAAAGG
qPCR_nrpB_R	Figure 2-figure supplement 1	AATTCCTCAAGCGGTTCCAC
new_abrB_0822_del_chkF	Figure 3-figure supplement 3	AATCCTCCGCCAAACTTTG
abrB_0822_tag4	Figure 3-figure supplement 3	GACTGATGGTGAAAACTCC
abrB_0359_chkF	Figure 3-figure supplement 3	AGAGGGAAAAATTCCTCGGC
abrB_0359_tag4	Figure 3-figure supplement 3	TCGCCAGGGAAAGTAATTGG
SigE_whole_del_chkF	Figure 3-figure supplement 3	GGAACGCTTGGAATGGCAAC
sigE_tag4	Figure 3-figure supplement 3	TGAAGGGGGTAGATTTAAGCC
ChIP_slr2118_F1	Figure 5C #1	CATTTCAAGCGAGATAGCAG
ChIP_slr2118_R1	Figure 5C #2	TGGAAAGTGCCTGTTCAAAG
ChIP_ThoxH_F	Figure 5C #2	CATCACCGAGGGCATATCTAG
ChIP_ThoxH_R	Figure 5C #2	ACATAAGGCTATGGAAACC
ChIP_pHox_2F	Figure 5C #3	ACAGAGGATGGACAAATGTC
ChIP_pHox_2R	Figure 5C #3	TACCGCTTCGTCATTCTGCT
ChIP_pHox_up_2R	Figure 5C #4	TCGATTACTTCCCTTTAGTG
ChIP_pHox_up_2F	Figure 5C #4	CTTCGGCTCCATGTATTC
ChIP_sll0814_F	Figure 5C #5	GTTACTACCGCTATCTATCG
ChIP_sll0814_R	Figure 5C #5	ATGACGTAAACCGGCTCTGAC
3Chox_Hcommon	Figure 7 (hox region)	CGGTCCCTTTGGACGTAATC
3Chox_H01_pos_+1	Figure 7 (hox region)	GGGTTGGGCGCAACATTAAG
3Chox_H02_pos_+3	Figure 7 (hox region)	CAAAGCGATTTTGGCTGGTG
3Chox_H03_pos_+4	Figure 7 (hox region)	GATGTGGTGGAAGATACGGAC
3Chox_H04_pos_+5	Figure 7 (hox region)	GGAGCCACAGGGGAATTTAAC
3Chox_H05_pos_+6	Figure 7 (hox region)	GGTCAGATTTTATTGGTTGCATGG
3Chox_H06_pos_+7	Figure 7 (hox region)	TTGTCAATGTCAACCGCAAC
3Chox_H07_pos_+8	Figure 7 (hox region)	TTATTGCCCAATCTGGCGAC
3Chox_H08_pos_+11	Figure 7 (hox region)	AGGCAAGACAGATAAACCTTCTG
3Chox_H09_pos_-2	Figure 7 (hox region)	GGGGCATAGGGAGCAAACC
3Chox_H10_pos_-4	Figure 7 (hox region)	GGGGTAGTACCGGAAGTGG
3Chox_H11_pos_-6	Figure 7 (hox region)	TTGGGCTGATTCTTGCAATTC
3Chox_H12_pos_-11	Figure 7 (hox region)	AGCTTTTGTCTAACACCGTATCG
3Chox_H13_pos_-13	Figure 7 (hox region)	AAGCCATCCTTCAAAACCCG
3Chox_H14_pos_-17	Figure 7 (hox region)	GCCCCATCGGTGAGAAAAAG
qPCR_hoxF_F	Figure 7 (hox internal control)	GTCATCTGCAATGCTGACGAA
qPCR_hoxF_R	Figure 7 (hox internal control)	CCAACACACTGCGGTCCAT
3CnifJ_Hcommon	Figure 7 (nifJ region)	ATTCTTTTCGCCAGTTTCTCCAC
3CnifJ_H01_pos-16	Figure 7 (nifJ region)	CATGCTGTTCTGTGCCCATC
3CnifJ_H02_pos-14	Figure 7 (nifJ region)	TCAGTGATATTTTGACCGCTGG
3CnifJ_H03_pos-13	Figure 7 (nifJ region)	AAAACCCCTGCCAACAAGAC
3CnifJ_H04_pos-12	Figure 7 (nifJ region)	CTCCCCACAATAAAGGGCTG
3CnifJ_H05_pos-10	Figure 7 (nifJ region)	TCATAGAAGCGGCGGATACC
3CnifJ_H06_pos-8	Figure 7 (nifJ region)	AGATAACGCCCCGGAACC
3CnifJ_H07_pos-7	Figure 7 (nifJ region)	GTATGGGTCGCCAAAGTACG
3CnifJ_H08_pos-6	Figure 7 (nifJ region)	AGGGATGGGGATCTTTGCTG
3CnifJ_H09_pos-4	Figure 7 (nifJ region)	TTATTGCTTTCACCCCGGC
3CnifJ_H10_pos-3	Figure 7 (nifJ region)	GCCCTAGGCCAAAGAATACC
3CnifJ_H11_pos-1	Figure 7 (nifJ region)	CCAGCCAGGGAGATGACC
3CnifJ_H12_pos+1	Figure 7 (nifJ region)	GCCATTGGGGGTTTATTGGC
3CnifJ_H13_pos+2	Figure 7 (nifJ region)	GTAAACAGATAGGTGGTGCGG
3CnifJ_H14_pos+6	Figure 7 (nifJ region)	TACAAAGCCAGGTAAGCGTC
3CnifJ_H16_pos+8	Figure 7 (nifJ region)	TCTGACCTATTGCCCTGACC
3CnifJ_H17_pos+9	Figure 7 (nifJ region)	CTGTTGTCATTGCTTGCTCC
3CnifJ_H18_pos+11	Figure 7 (nifJ region)	TGTAGCCAGTGAAGGGGAAG
3CnifJ_H19_pos+14	Figure 7 (nifJ region)	TCCCGGTATTAATGGCATTGG
3CnifJ_H20_pos+15	Figure 7 (nifJ region)	GTTGTGTGATTCCCCAAGCC
3CnifJ_H22_pos+17	Figure 7 (nifJ region)	CTTATTTTGTACCCGGCACCC

## Sheet: b
supplementary file 1b: Numbers and percentages of NGS reads passed the processes
			Reads passed by fastp		mapping by bowtie2						HT-seq count
Sample discription	SRA numder	Raw reads	number	% of raw reads	paired reads aligned concordantly exactly 1 time	paired reads aligned concordantly >1 times	paired reads aligned discordantly 1 time	mates aligned exactly 1 time	mates aligned >1 times	overall alignment rate	unambiguously mapped to CDS	% of fastp-passed reads
WT-RNA-aerobic-1	SRR24202436	4419361	4344159	0.982984	2795834	1331565	20618	17128	40244	0.9615	2548559	0.586663
WT-RNA-microoxic_1hr-1	SRR24202435	4770768	4675240	0.979976	3145493	1340988	32008	21152	46427	0.9737	2799580	0.59881
WT-RNA-microoxic_2hr-1	SRR24202424	4507636	4405138	0.977261	2705894	1390790	29031	8041	41982	0.9422	2428285	0.551239
WT-RNA-microoxic_4hr-1	SRR24202413	4826081	4746866	0.983586	2768061	1548824	21657	7545	48466	0.9199	2424797	0.510821
WT-RNA-aerobic-2	SRR24202402	4739240	4654717	0.982165	3074120	1478544	25344	9043	39396	0.9887	2872023	0.617013
WT-RNA-microoxic_1hr-2	SRR24202391	4414055	4338010	0.982772	3044241	925451	27983	12373	36373	0.9272	2726442	0.628501
WT-RNA-microoxic_2hr-2	SRR24202380	5776548	5682460	0.983712	4223458	1314882	35818	15733	42225	0.986	3694055	0.65008
WT-RNA-microoxic_4hr-2	SRR24202379	5061098	4980392	0.984054	2525194	2220096	23457	17386	82476	0.9675	2168086	0.435324
WT-RNA-aerobic-3	SRR24202378	4992960	4893684	0.980117	3316040	930386	31924	14940	30838	0.8789	3106680	0.634835
WT-RNA-microoxic_1hr-3	SRR24202377	4601326	4508143	0.979749	3163615	1017830	31219	14345	39071	0.9404	2878264	0.638459
WT-RNA-microoxic_2hr-3	SRR24202434	5667592	5565784	0.982037	3591720	1768278	36162	22499	71734	0.978	3197130	0.574426
WT-RNA-microoxic_4hr-3	SRR24202433	6264743	6136451	0.979522	3999780	1838556	36454	15307	76301	0.9648	3452995	0.562702
sigE-RNA-aerobic-1	SRR24202432	4467763	4383098	0.98105	3267331	949276	34271	13241	28431	0.9746	3045116	0.694741
sigE-RNA-microoxic_1hr-1	SRR24202431	4288778	4218487	0.98361	3018017	1049234	28846	16815	35286	0.9772	2721414	0.645116
sigE-RNA-microoxic_2hr-1	SRR24202430	5004021	4904300	0.980072	3542145	1177805	38156	22685	37640	0.9763	3189633	0.650375
sigE-RNA-aerobic-2	SRR24202429	3416848	3347776	0.979785	2845944	376564	30129	17945	17182	0.9768	2664153	0.795798
sigE-RNA-microoxic_1hr-2	SRR24202428	3763710	3682730	0.978484	2931538	432832	30006	33221	19557	0.9289	2693269	0.731324
sigE-RNA-microoxic_2hr-2	SRR24202427	4774874	4691666	0.982574	3811180	704187	34884	19918	24445	0.9746	3424142	0.729835
sigE-RNA-aerobic-3	SRR24202426	3867639	3781539	0.977738	2854609	435186	26161	13828	17754	0.8811	2689939	0.711334
sigE-RNA-microoxic_1hr-3	SRR24202425	4705872	4621007	0.981966	3507909	825835	31800	10392	27157	0.9488	3252205	0.703787
sigE-RNA-microoxic_2hr-3	SRR24202423	5040212	4942814	0.980676	3711994	1022952	35149	32362	48254	0.9732	3319467	0.671574
abrB2-RNA-aerobic-1	SRR24202422	5571908	5480348	0.983568	3974154	1278871	45519	14466	47168	0.9724	3500947	0.638818
abrB2-RNA-microoxic_1hr-1	SRR24202421	5030820	4941246	0.982195	3608117	1106015	41184	21817	53290	0.97	3139962	0.63546
abrB2-RNA-microoxic_2hr-1	SRR24202420	5295074	5196826	0.981445	3238546	1774155	34835	8175	85222	0.9803	2777437	0.534449
abrB2-RNA-aerobic-2	SRR24202419	6377639	6271395	0.983341	4763981	1230504	50599	37720	42054	0.9703	4284433	0.683171
abrB2-RNA-microoxic_1hr-2	SRR24202418	5101867	4996893	0.979424	3570719	1066216	43591	32513	43579	0.9443	3170029	0.6344
abrB2-RNA-microoxic_2hr-2	SRR24202417	5956736	5849950	0.982073	4070659	1326248	41282	8030	46023	0.9342	3530061	0.603434
abrB2-RNA-aerobic-3	SRR24202416	6165356	6044660	0.980424	4439611	981510	47028	15040	33624	0.9087	4129363	0.683142
abrB2-RNA-microoxic_1hr-3	SRR24202415	9476494	9272152	0.978437	6812259	1435633	65090	13870	50370	0.9	6025190	0.649816
abrB2-RNA-microoxic_2hr-3	SRR24202414	4740297	4651078	0.981179	2713089	1127448	24496	6902	52595	0.8374	2341580	0.503449
SigE-3FLAG-aerobic-ChIP-IP-1	SRR24202412	1982353	1933185	0.975197	1690547	64301	81027	5543	7230	0.953
SigE-3FLAG-aerobic-ChIP-Input-1	SRR24202411	2219953	2154871	0.970683	1844967	96316	87646	5685	8573	0.9449
SigE-3FLAG-microoxic_1hr-ChIP-IP-1	SRR24202410	4018952	3886050	0.966931	3007242	161497	224934	17073	26885	0.879
SigE-3FLAG-microoxic_1hr-ChIP-Input-1	SRR24202409	1439664	1392468	0.967217	1155171	61840	90270	5512	10817	0.9447
SigE-3FLAG-aerobic-ChIP-IP-2	SRR24202408	2903094	2824874	0.973056	2452083	92540	140837	8932	12581	0.9545
SigE-3FLAG-aerobic-ChIP-Input-2	SRR24202407	1934976	1877825	0.970464	1579424	84211	103396	6566	12144	0.946
SigE-3FLAG-microoxic_1hr-ChIP-IP-2	SRR24202406	2364371	2288540	0.967928	1782391	99371	106673	9090	13067	0.8737
SigE-3FLAG-microoxic_1hr-ChIP-Input-2	SRR24202405	1090159	1063468	0.975516	900911	48162	51211	3264	6141	0.945
SigA-3FLAG-aerobic-ChIP-IP-1	SRR24202404	2573774	2531740	0.983668	2299421	109704	31522	4478	3281	0.9656
SigA-3FLAG-aerobic-ChIP-Input-1	SRR24202403	4594101	4466735	0.972276	3886075	190797	109654	12253	12733	0.9401
SigA-3FLAG-microoxic_1hr-ChIP-IP-1	SRR24202401	2483637	2433867	0.979961	2146763	107100	30289	4425	3278	0.9401
SigA-3FLAG-microoxic_1hr-ChIP-Input-1	SRR24202400	1191908	1157506	0.971137	1008558	49728	36124	3415	3974	0.9487
SigA-3FLAG-aerobic-ChIP-IP-2	SRR24202399	2328166	2272621	0.976142	2068517	95567	34079	4441	3042	0.9689
SigA-3FLAG-aerobic-ChIP-Input-2	SRR24202398	2421377	2366675	0.977409	2107519	102612	57936	5533	5658	0.9607
SigA-3FLAG-microoxic_1hr-ChIP-IP-2	SRR24202397	2397074	2346086	0.978729	2107681	97672	29183	4519	3075	0.9541
SigA-3FLAG-microoxic_1hr-ChIP-Input-2	SRR24202396	3496153	3424356	0.979464	3040170	149776	71829	7910	8290	0.9549
abrB2-3FLAG-aerobic-ChIP-IP-1	SRR24202395	2635306	2570776	0.975513	2202782	188046	80280	8045	14039	0.9655
abrB2-3FLAG-aerobic-ChIP-Input-1	SRR24202394	2964703	2854526	0.962837	2378117	123348	153839	11062	17611	0.9352
abrB2-3FLAG-microoxic_1hr-ChIP-IP-1	SRR24202393	2630488	2561120	0.973629	2202084	168312	94140	9336	16471	0.9673
abrB2-3FLAG-microoxic_1hr-ChIP-Input-1	SRR24202392	3065668	2965226	0.967237	2464000	126140	165191	12082	19232	0.9345
abrB2-3FLAG-aerobic-ChIP-IP-2	SRR24202390	3832718	3718236	0.97013	3169158	275586	128918	12329	25015	0.9661
abrB2-3FLAG-aerobic-ChIP-Input-2	SRR24202389	3252689	3151200	0.968798	2626953	137181	197557	13652	22882	0.9457
abrB2-3FLAG-microoxic_1hr-ChIP-IP-2	SRR24202388	4133375	4037283	0.976752	3430864	264183	135126	13581	23340	0.9533
abrB2-3FLAG-microoxic_1hr-ChIP-Input-2	SRR24202387	3135200	3043308	0.97069	2575112	133091	166988	11737	18737	0.9498
abrB1-3FLAG-aerobic-ChIP-IP-1	SRR24202386	1638680	1598821	0.975676	1364848	108845	28618	3039	4994	0.9421
abrB1-3FLAG-aerobic-ChIP-Input-1	SRR24202385	1773186	1726413	0.973622	1538468	81316	43926	3452	5040	0.9661
abrB1-3FLAG-aerobic-ChIP-IP-2	SRR24202384	4446672	4316850	0.970805	3628032	287911	177984	13389	30739	0.9535
abrB1-3FLAG-aerobic-ChIP-Input-2	SRR24202383	4886717	4724676	0.966841	4089981	206586	283252	19689	31602	0.9748
Untagged-aerobic-ChIP-IP	SRR24202382	1686567	1623734	0.962745	1335964	82430	93007	5582	13082	0.9366
Untagged-aerobic-ChIP-Input	SRR24202381	2051280	1989012	0.969644	1745815	89382	107168	6603	12290	0.9813

## Sheet: c
supplementary file 1c: Log2FC, LogCPM, LR, Pvalue, and FDR calucuated by edgeR lrt method (Time-corse transcriptome for GT strain)
	Aerobic vs micoroxic 1hr					Aerobic vs micoroxic 2hr					Aerobic vs micoroxic 4hr					micoroxic 1hr vs micoroxic 4hr
	logFC	logCPM	LR	PValue	FDR	logFC	logCPM	LR	PValue	FDR	logFC	logCPM	LR	PValue	FDR	logFC	logCPM	LR	PValue	FDR
rnpB	0.699211	17.7046	2.7887	0.0949309	0.163004	1.08988	17.7046	6.68472	0.0097243	0.020814	1.88064	17.7046	19.0732	1.25796e-05	4.52838e-05	1.18143	17.7046	7.8241	0.00515542	0.0394234
sgl0001	0.00153278	2.41072	6.99286e-06	0.99789	0.998813	0.0220196	2.41072	0.00151144	0.968988	0.977721	0.735871	2.41072	1.86985	0.171493	0.234246	0.734338	2.41072	1.84018	0.17493	0.423248
sgl0002	-1.44805	4.13373	25.6184	4.16055e-07	3.87086e-06	-1.9479	4.13373	42.5105	7.03022e-11	8.71264e-10	-1.61276	4.13373	27.801	1.34455e-07	6.87521e-07	-0.164707	4.13373	0.247684	0.61871	0.828776
sll0002	1.21975	8.55921	23.5044	1.2463e-06	1.0297e-05	1.65127	8.55921	42.3162	7.76474e-11	9.47824e-10	2.13995	8.55921	69.0053	9.82008e-17	1.87564e-15	0.920194	8.55921	13.7611	0.000207588	0.00342151
sll0005	-0.436276	5.88881	1.62567	0.202303	0.300906	-0.0935941	5.88881	0.0757698	0.783114	0.836713	0.394319	5.88881	1.33954	0.247114	0.319165	0.830596	5.88881	5.80731	0.0159597	0.0927031
sll0006	-0.571076	4.97971	2.84915	0.0914221	0.15815	-0.389013	4.97971	1.34032	0.246977	0.338937	-0.722061	4.97971	4.33034	0.0374387	0.0629537	-0.150985	4.97971	0.184737	0.667333	0.858022
sll0007	-0.577737	4.52569	2.94515	0.0861357	0.150854	-0.349324	4.52569	1.08811	0.29689	0.392829	-0.480956	4.52569	1.9378	0.163907	0.225894	0.0967813	4.52569	0.0753009	0.78377	0.919738
sll0008	-0.780402	2.12263	2.43909	0.118345	0.194762	-1.30678	2.12263	6.12255	0.0133468	0.027533	-1.13498	2.12263	4.19492	0.0405453	0.0673061	-0.354578	2.12263	0.359057	0.54903	0.780953
sll0016	0.207874	5.84116	0.626806	0.428529	0.543182	0.393772	5.84116	2.25849	0.132884	0.200034	0.202874	5.84116	0.576892	0.447533	0.523875	-0.00499978	5.84116	0.000352526	0.98502	0.994159
sll0017	-1.19064	6.12502	18.2684	1.91865e-05	0.000110458	-1.31891	6.12502	22.148	2.52414e-06	1.33266e-05	-1.33688	6.12502	22.0339	2.67875e-06	1.08996e-05	-0.146243	6.12502	0.259985	0.610131	0.822545
sll0018	0.064555	10.7248	0.0448805	0.832224	0.881354	0.254746	10.7248	0.698144	0.403408	0.503795	0.312316	10.7248	1.04799	0.30597	0.383437	0.24776	10.7248	0.659994	0.416562	0.690795
sll0019	-1.17004	4.74602	14.348	0.000151942	0.000691945	-0.546557	4.74602	3.33681	0.0677459	0.113329	-0.303379	4.74602	0.994329	0.318687	0.395859	0.86666	4.74602	7.32261	0.00680923	0.0493517
sll0020	1.89776	13.0237	41.8227	9.99361e-11	2.13482e-09	2.40373	13.0237	64.731	8.58519e-16	2.48894e-14	2.98967	13.0237	95.4711	1.50063e-22	6.16777e-21	1.09191	13.0237	14.4777	0.000141826	0.00257268
sll0021	1.5954	5.59173	28.7139	8.38973e-08	9.29743e-07	1.83493	5.59173	38.0592	6.86319e-10	7.07453e-09	2.022	5.59173	45.1434	1.83118e-11	1.63509e-10	0.426597	5.59173	2.31475	0.128152	0.35613
sll0022	-0.123357	4.72624	0.125189	0.723473	0.801469	-0.436035	4.72624	1.53142	0.2159	0.302689	-1.55143	4.72624	16.2067	5.6794e-05	0.000183675	-1.42808	4.72624	13.6576	0.000219353	0.00357909
sll0023	-1.7108	4.79156	28.6463	8.68817e-08	9.53057e-07	-2.16939	4.79156	43.2855	4.73074e-11	6.10534e-10	-3.02411	4.79156	68.7723	1.10514e-16	2.06229e-15	-1.31331	4.79156	12.2062	0.000476316	0.00636461
sll0024	-0.894075	4.73339	8.4867	0.00357751	0.0106904	-1.78099	4.73339	30.1666	3.96485e-08	3.02204e-07	-1.76234	4.73339	27.8485	1.31196e-07	6.72974e-07	-0.86826	4.73339	6.52176	0.0106563	0.0686526
sll0026	-1.5396	7.07951	29.4867	5.63009e-08	6.57587e-07	-1.66739	7.07951	34.231	4.89428e-09	4.37788e-08	-1.80411	7.07951	39.0345	4.16382e-10	3.13687e-09	-0.264514	7.07951	0.859937	0.353756	0.630086
sll0027	-2.71979	5.29859	82.6166	9.9619e-20	1.47029e-17	-3.00224	5.29859	96.3583	9.58638e-23	7.59195e-21	-3.03414	5.29859	91.8162	9.5115e-22	3.46124e-20	-0.314351	5.29859	0.888014	0.346016	0.619357
sll0031	-0.531188	5.02707	2.92174	0.0873938	0.152645	-1.10446	5.02707	12.0108	0.000528942	0.0015932	-1.56956	5.02707	21.7362	3.12832e-06	1.25558e-05	-1.03837	5.02707	9.38609	0.00218637	0.0203414
sll0033	-0.414569	4.0892	1.31579	0.251348	0.360481	0.00908765	4.0892	0.000664504	0.979434	0.98581	-0.185464	4.0892	0.253851	0.614376	0.681544	0.229105	4.0892	0.372243	0.541784	0.779084
sll0034	-0.252385	4.52434	0.435592	0.509258	0.620517	0.0210312	4.52434	0.0030938	0.955643	0.967261	-0.0817564	4.52434	0.0443598	0.833186	0.868492	0.170628	4.52434	0.190207	0.662744	0.858022
sll0036	-0.238842	4.52608	0.642436	0.42283	0.53735	-0.495301	4.52608	2.68683	0.101181	0.158712	-0.742599	4.52608	5.45761	0.0194833	0.0351847	-0.503757	4.52608	2.45904	0.11685	0.33655
sll0037	0.138018	5.08446	0.154257	0.6945	0.779212	0.0403552	5.08446	0.0130885	0.908917	0.935717	0.224176	5.08446	0.393652	0.530386	0.603421	0.0861579	5.08446	0.0584086	0.809029	0.929765
sll0038	1.10612	8.71253	19.8938	8.18638e-06	5.35911e-05	1.51913	8.71253	36.9368	1.22019e-09	1.19932e-08	1.90995	8.71253	57.0626	4.22161e-14	5.2925e-13	0.803838	8.71253	10.7534	0.00104088	0.0119005
sll0039	0.0704089	5.66885	0.0737396	0.785968	0.849829	0.459073	5.66885	3.18292	0.0744115	0.122581	0.454034	5.66885	3.01555	0.0824695	0.125306	0.383625	5.66885	2.15343	0.142252	0.377672
sll0040	0.972813	9.81825	5.93146	0.0148729	0.0363911	1.62807	9.81825	16.1161	5.95753e-05	0.000229467	1.75762	9.81825	18.6306	1.58654e-05	5.63004e-05	0.78481	9.81825	3.89331	0.0484789	0.202961
sll0041	0.700597	8.14222	4.42082	0.0355029	0.0731525	1.08519	8.14222	10.4968	0.00119578	0.00329322	1.15786	8.14222	11.8786	0.000567825	0.00147498	0.457265	8.14222	1.89985	0.168095	0.413965
sll0042	0.984484	4.68504	7.37916	0.0065984	0.0179289	1.57554	4.68504	19.3191	1.10594e-05	5.03643e-05	1.64529	4.68504	20.449	6.12413e-06	2.32846e-05	0.660802	4.68504	3.62212	0.0570162	0.224604
sll0043	0.535079	6.98989	4.34429	0.0371332	0.0757835	0.824157	6.98989	10.2966	0.00133277	0.00363352	0.815954	6.98989	9.95076	0.00160783	0.00378032	0.280875	6.98989	1.20445	0.272434	0.546737
sll0044	-0.529663	2.62218	1.47769	0.224137	0.327973	-0.153818	2.62218	0.134013	0.714307	0.782508	-0.0451142	2.62218	0.0104187	0.918699	0.934822	0.484549	2.62218	1.09007	0.296457	0.56891
sll0045	0.259368	4.21374	0.75705	0.384253	0.498869	0.13673	4.21374	0.206181	0.649777	0.728531	0.0125297	4.21374	0.00158216	0.968271	0.972765	-0.246839	4.21374	0.62717	0.428395	0.698134
sll0047	-0.550709	6.95034	3.16832	0.0750795	0.13521	-1.35356	6.95034	18.3683	1.82058e-05	7.94551e-05	-1.62101	6.95034	25.47	4.49304e-07	2.12048e-06	-1.0703	6.95034	11.2821	0.000782578	0.00934792
sll0048	1.85063	8.14744	39.9379	2.62161e-10	5.06688e-09	2.22452	8.14744	56.5099	5.59164e-14	1.25214e-12	2.31456	8.14744	60.6328	6.87788e-15	9.92554e-14	0.46393	8.14744	2.71394	0.0994748	0.30879
sll0051	0.00965948	8.68448	0.00142412	0.969897	0.978942	-0.151434	8.68448	0.349323	0.554497	0.646138	-0.575622	8.68448	4.97304	0.0257454	0.0449921	-0.585282	8.68448	5.1379	0.0234089	0.122201
sll0053	-0.231973	5.70885	0.585599	0.444126	0.558556	-0.189196	5.70885	0.389889	0.532358	0.627557	-0.50453	5.70885	2.65542	0.103198	0.152797	-0.272557	5.70885	0.76824	0.380762	0.659027
sll0055	0.971108	5.47711	8.78111	0.00304365	0.00934096	1.46146	5.47711	19.9835	7.81116e-06	3.67577e-05	1.41232	5.47711	18.2924	1.8946e-05	6.64339e-05	0.441217	5.47711	1.91538	0.166367	0.411105
sll0057	0.481423	8.13841	3.91399	0.0478858	0.0940055	0.535922	8.13841	4.84407	0.0277414	0.0520372	0.593034	8.13841	5.89119	0.0152168	0.0282984	0.111611	8.13841	0.210968	0.64601	0.846349
sll0058	0.308764	5.69855	1.40593	0.235734	0.34232	0.162265	5.69855	0.384607	0.535148	0.629803	0.0733461	5.69855	0.0752915	0.783783	0.828432	-0.235418	5.69855	0.784759	0.37569	0.656002
sll0060	-0.157808	2.78811	0.167743	0.682125	0.769851	0.106841	2.78811	0.0801328	0.777117	0.8314	-0.797459	2.78811	3.22226	0.0726433	0.112213	-0.639651	2.78811	1.9985	0.157455	0.398939
sll0062	-1.01509	5.49674	14.0105	0.000181789	0.000808589	-0.92105	5.49674	11.6044	0.00065796	0.00192816	-1.4685	5.49674	26.6016	2.50035e-07	1.24643e-06	-0.453406	5.49674	2.45382	0.117239	0.336788
sll0063	-0.405382	5.51228	2.47259	0.115847	0.191622	-0.50581	5.51228	3.81039	0.0509357	0.0883484	-0.286574	5.51228	1.19245	0.274835	0.349136	0.118808	5.51228	0.199825	0.654862	0.852923
sll0064	-1.27573	4.46808	15.3342	9.00694e-05	0.00044089	-2.24574	4.46808	41.7192	1.05369e-10	1.26248e-09	-2.75429	4.46808	53.3574	2.78065e-13	3.12415e-12	-1.47856	4.46808	14.5355	0.00013754	0.00252313
sll0065	0.396125	7.22717	2.03507	0.153707	0.239141	0.702043	7.22717	6.38107	0.0115344	0.0241316	1.2953	7.22717	21.3148	3.89716e-06	1.53197e-05	0.899177	7.22717	10.4869	0.00120224	0.0131881
sll0066	1.41793	6.41583	21.8984	2.87469e-06	2.13595e-05	2.0452	6.41583	45.0937	1.87825e-11	2.62874e-10	2.58775	6.41583	70.0961	5.64833e-17	1.15347e-15	1.16982	6.41583	16.2513	5.54729e-05	0.00125813
sll0067	0.914483	5.78648	11.676	0.000633106	0.00239592	1.25114	5.78648	22.005	2.71937e-06	1.4173e-05	1.45449	5.78648	29.0808	6.94225e-08	3.73822e-07	0.540004	5.78648	4.30774	0.0379394	0.175734
sll0068	0.395049	7.84383	1.65714	0.19799	0.29571	0.694237	7.84383	5.09996	0.0239264	0.045997	0.818882	7.84383	7.04224	0.00796094	0.0158681	0.423834	7.84383	1.90974	0.166993	0.412025
sll0069	0.734062	3.1943	4.40941	0.0357412	0.0734504	0.029814	3.1943	0.00644872	0.935996	0.954815	0.0223095	3.1943	0.00324952	0.954542	0.962545	-0.711752	3.1943	3.64752	0.0561529	0.223442
sll0070	0.358639	6.13238	1.79476	0.180347	0.273511	0.389786	6.13238	2.11729	0.145644	0.216037	0.269668	6.13238	0.986913	0.320498	0.397805	-0.0889713	6.13238	0.108662	0.741673	0.898042
sll0071	-0.119054	4.45246	0.0661729	0.796993	0.857467	-0.564068	4.45246	1.44479	0.229366	0.317591	-0.297959	4.45246	0.399211	0.527497	0.601187	-0.178904	4.45246	0.142978	0.705338	0.87883
sll0072	-0.481436	2.44059	1.01642	0.313371	0.428067	-0.96918	2.44059	3.81954	0.0506582	0.0879611	-0.615557	2.44059	1.45899	0.227092	0.297805	-0.134121	2.44059	0.0640891	0.800146	0.927884
sll0078	-0.0470768	5.56031	0.019797	0.888105	0.925768	0.561447	5.56031	2.87448	0.0899939	0.144088	0.910443	5.56031	7.44492	0.00636156	0.0129912	0.95752	5.56031	8.18114	0.00423281	0.0339356
sll0080	0.527817	9.66522	3.4065	0.0649401	0.120703	0.451336	9.66522	2.49341	0.114324	0.176598	0.385419	9.66522	1.81651	0.177729	0.241086	-0.142398	9.66522	0.248915	0.61784	0.828214
sll0082	0.267171	3.23824	0.585393	0.444206	0.558556	0.242263	3.23824	0.477957	0.489349	0.586966	-0.208787	3.23824	0.291316	0.589378	0.659446	-0.475958	3.23824	1.56434	0.211031	0.46997
sll0083	-0.837771	6.05769	7.80054	0.00522306	0.0147344	-1.00372	6.05769	11.0687	0.000877972	0.00249412	-1.31631	6.05769	18.1554	2.03596e-05	7.0931e-05	-0.478543	6.05769	2.39313	0.12187	0.344396
sll0084	-0.97351	2.7737	5.77499	0.0162558	0.0390114	-1.17098	2.7737	8.07802	0.00448054	0.0105499	-1.73779	2.7737	13.7363	0.000210351	0.000600718	-0.764284	2.7737	2.2922	0.130026	0.358655
sll0085	-0.545505	3.0523	1.86769	0.171739	0.262294	-0.39906	3.0523	1.01979	0.312568	0.409898	-0.0644717	3.0523	0.0256382	0.872787	0.899663	0.481034	3.0523	1.31445	0.25159	0.521324
sll0086	1.56393	7.14126	29.02	7.16356e-08	8.16143e-07	1.89957	7.14126	42.277	7.92201e-11	9.634e-10	2.36408	7.14126	63.687	1.45847e-15	2.32068e-14	0.800149	7.14126	8.1561	0.00429166	0.0343227
sll0088	0.265474	7.00033	0.29591	0.586458	0.685962	2.63885	7.00033	26.9175	2.12326e-07	1.40986e-06	3.29376	7.00033	39.8302	2.77028e-10	2.1474e-09	3.02828	7.00033	34.5205	4.21783e-09	5.47811e-07
sll0092	2.40297	5.97689	31.5041	1.99018e-08	2.5542e-07	2.34192	5.97689	29.9764	4.3733e-08	3.31005e-07	3.11457	5.97689	50.712	1.06963e-12	1.10608e-11	0.711595	5.97689	3.21725	0.072866	0.256334
sll0094	2.48896	9.69687	65.8062	4.97519e-16	3.94011e-14	3.40768	9.69687	114.985	7.92969e-27	1.34226e-24	4.70076	9.69687	195.155	2.38354e-44	8.59928e-42	2.2118	9.69687	54.4489	1.59544e-13	1.1098e-10
sll0095	-0.929842	3.97817	8.86295	0.00291016	0.00900791	-0.621075	3.97817	4.12268	0.0423119	0.0750747	-0.665479	3.97817	4.31984	0.0376705	0.0633106	0.264363	3.97817	0.609316	0.435045	0.703132
sll0096	0.526899	3.7077	2.82058	0.0930629	0.160305	0.791716	3.7077	6.62081	0.0100794	0.021475	0.725089	3.7077	4.97737	0.0256811	0.0449038	0.19819	3.7077	0.401615	0.526256	0.76949
sll0098	0.777304	7.4672	8.91766	0.00282426	0.00877124	1.20702	7.4672	21.3354	3.85539e-06	1.92888e-05	1.41458	7.4672	28.9038	7.60637e-08	4.06215e-07	0.637273	7.4672	6.10904	0.0134492	0.0822404
sll0099	0.0990323	3.42999	0.0517351	0.820071	0.873429	-0.0450244	3.42999	0.0104984	0.91839	0.942184	0.36596	3.42999	0.678809	0.409997	0.490878	0.266927	3.42999	0.361998	0.547399	0.780953
sll0100	0.309875	5.54525	1.12257	0.289367	0.402732	0.36744	5.54525	1.585	0.208043	0.292481	0.719644	5.54525	5.97639	0.0144986	0.0271761	0.409769	5.54525	1.96905	0.160549	0.403314
sll0101	-0.654929	4.71659	3.46814	0.0625615	0.116947	-0.776699	4.71659	4.79658	0.0285162	0.0532139	-0.712232	4.71659	3.8993	0.0483062	0.0781516	-0.0573032	4.71659	0.0244589	0.875723	0.954506
sll0102	1.18359	4.46397	11.0356	0.00089377	0.00324616	1.18471	4.46397	11.0223	0.000900202	0.00254391	1.30854	4.46397	13.09	0.000296884	0.000820409	0.124948	4.46397	0.133331	0.715003	0.883711
sll0103	2.06358	8.44497	60.6801	6.71471e-15	4.19282e-13	2.68304	8.44497	98.8005	2.79259e-23	2.59072e-21	2.97736	8.44497	118.887	1.10873e-27	8.5715e-26	0.913784	8.44497	13.0491	0.000303427	0.00460386
sll0107	-1.24893	2.57541	6.09902	0.0135257	0.0334996	-1.67479	2.57541	10.3067	0.00132548	0.00361666	-3.24419	2.57541	24.5522	7.23245e-07	3.28444e-06	-1.99526	2.57541	8.12786	0.00435901	0.0346072
sll0108	-0.105105	10.881	0.124676	0.724018	0.801529	-0.0335382	10.881	0.0126968	0.910284	0.936582	-0.0687336	10.881	0.0532857	0.817442	0.855376	0.0363715	10.881	0.0149188	0.902786	0.962587
sll0109	-0.323397	7.51034	1.05014	0.305474	0.420286	-0.434803	7.51034	1.89205	0.168971	0.24548	-0.519249	7.51034	2.67451	0.101967	0.151265	-0.195851	7.51034	0.380664	0.537248	0.775851
sll0135	0.620799	5.11089	4.92675	0.0264441	0.0577042	0.805269	5.11089	8.36015	0.00383538	0.00927288	0.518644	5.11089	3.24433	0.0716709	0.11087	-0.102155	5.11089	0.131519	0.716862	0.883711
sll0136	0.444657	5.16957	2.07022	0.1502	0.235149	0.241099	5.16957	0.60315	0.437379	0.538555	0.160681	5.16957	0.255119	0.613493	0.681163	-0.283976	5.16957	0.812799	0.367294	0.645656
sll0141	1.34176	5.58396	15.9254	6.58883e-05	0.000334803	1.68201	5.58396	24.9688	5.82642e-07	3.52955e-06	2.11731	5.58396	38.7051	4.92927e-10	3.66255e-09	0.775553	5.58396	5.82153	0.0158312	0.092287
sll0142	1.07639	6.9304	15.2695	9.32109e-05	0.000454438	1.01461	6.9304	13.5676	0.000230119	0.000764786	1.47486	6.9304	28.1018	1.151e-07	5.97969e-07	0.398473	6.9304	2.17069	0.140663	0.374678
sll0144	-1.26738	5.14444	12.2243	0.000471711	0.00185205	-1.47949	5.14444	16.32	5.34973e-05	0.000208781	-1.50964	5.14444	16.5018	4.86043e-05	0.000159573	-0.242252	5.14444	0.417011	0.518432	0.764464
sll0145	-0.451925	5.83928	2.13815	0.143675	0.227456	-0.590458	5.83928	3.61772	0.057167	0.0977469	-1.04466	5.83928	10.6592	0.00109527	0.00267192	-0.592734	5.83928	3.41262	0.0646995	0.238229
sll0146	-0.416979	4.89899	2.45889	0.116861	0.193042	-0.503507	4.89899	3.54696	0.0596546	0.101254	-0.831862	4.89899	8.68861	0.00320206	0.00702031	-0.414883	4.89899	2.09034	0.148233	0.387021
sll0147	0.388956	6.31045	1.93872	0.163807	0.252608	0.419117	6.31045	2.25133	0.133499	0.200727	0.0881019	6.31045	0.0966258	0.755917	0.80527	-0.300854	6.31045	1.13594	0.286512	0.558856
sll0148	0.643414	7.94554	6.27492	0.0122458	0.0306807	0.879641	7.94554	11.6817	0.000631189	0.00186655	1.03507	7.94554	16.0205	6.26589e-05	0.000200053	0.391657	7.94554	2.34852	0.125402	0.350918
sll0149	-0.477473	6.16171	3.08746	0.0788978	0.141069	-0.656135	6.16171	5.76951	0.0163066	0.0329276	-0.398734	6.16171	2.1062	0.146703	0.206658	0.0787396	6.16171	0.0809217	0.776052	0.91421
sll0154	-1.18216	7.14474	9.91525	0.00163915	0.00548691	-1.51159	7.14474	15.9051	6.65975e-05	0.000253211	-1.8507	7.14474	23.0837	1.55104e-06	6.55757e-06	-0.66854	7.14474	3.13604	0.0765796	0.262958
sll0156	1.53668	6.99995	34.9354	3.40829e-09	5.24489e-08	1.8729	6.99995	51.4605	7.30525e-13	1.32515e-11	2.34731	6.99995	78.7837	6.92962e-19	1.85954e-17	0.810636	6.99995	10.5867	0.00113907	0.0127098
sll0157	2.40716	6.81661	63.3251	1.75255e-15	1.21075e-13	3.0143	6.81661	97.1571	6.40378e-23	5.35657e-21	3.57004	6.81661	131.721	1.72188e-30	2.15037e-28	1.16288	6.81661	17.7418	2.53e-05	0.000678918
sll0158	-0.730764	6.53574	7.48774	0.00621206	0.0170792	-0.768616	6.53574	8.2513	0.00407229	0.00975127	-0.791073	6.53574	8.54528	0.00346419	0.00753378	-0.0603099	6.53574	0.0491696	0.824515	0.937066
sll0160	-1.2294	4.51063	16.0937	6.02836e-05	0.000310208	-1.03734	4.51063	11.7459	0.000609784	0.00180984	-0.855633	4.51063	7.61447	0.00579017	0.0119597	0.373764	4.51063	1.31151	0.252122	0.521565
sll0162	0.886574	4.64464	6.17046	0.0129901	0.0323457	1.19498	4.64464	11.3048	0.000773088	0.0022234	1.43751	4.64464	16.01	6.30087e-05	0.000200972	0.550932	4.64464	2.54535	0.11062	0.325641
sll0163	1.4588	8.41823	33.7297	6.33249e-09	9.01824e-08	1.67177	8.41823	43.8828	3.48635e-11	4.62047e-10	1.97141	8.41823	59.8628	1.01708e-14	1.42347e-13	0.512611	8.41823	4.37833	0.0363986	0.170991
sll0166	0.284358	5.76174	0.644492	0.422089	0.536618	0.333934	5.76174	0.890137	0.34544	0.442514	0.327726	5.76174	0.84124	0.359043	0.438275	0.0433683	5.76174	0.0148466	0.90302	0.962587
sll0167	-0.0523081	4.57046	0.0245633	0.87546	0.915497	-0.148806	4.57046	0.196857	0.65727	0.734902	0.386459	4.57046	1.32214	0.250209	0.322018	0.438768	4.57046	1.68984	0.193623	0.444935
sll0168	0.149929	3.4055	0.176048	0.674791	0.763964	0.175276	3.4055	0.24132	0.623254	0.703898	0.859052	3.4055	5.87165	0.0153866	0.0285814	0.709123	3.4055	4.05869	0.0439444	0.192014
sll0169	0.686299	9.84143	5.49749	0.0190438	0.0443899	1.04122	9.84143	12.5173	0.000403201	0.00125282	1.26457	9.84143	18.2732	1.91382e-05	6.69631e-05	0.578268	9.84143	3.92055	0.0476994	0.20217
sll0170	0.302539	12.8447	1.09758	0.294797	0.408365	0.818816	12.8447	7.95023	0.00480814	0.0112075	1.34005	12.8447	20.8446	4.98087e-06	1.93224e-05	1.03752	12.8447	12.6662	0.000372324	0.00532571
sll0171	0.361252	4.61391	1.08551	0.297469	0.411714	0.43945	4.61391	1.61381	0.203957	0.288184	0.816359	4.61391	5.46292	0.0194242	0.0350976	0.455107	4.61391	1.73729	0.187483	0.438808
sll0172	-0.413913	4.00588	0.894232	0.344333	0.457654	-0.0292918	4.00588	0.00458967	0.945987	0.961082	-0.174724	4.00588	0.155004	0.693798	0.751231	0.239189	4.00588	0.282246	0.595233	0.811703
sll0173	-0.660037	4.77645	4.42128	0.0354934	0.0731525	-0.199411	4.77645	0.419766	0.517054	0.613848	-0.423896	4.77645	1.76401	0.184125	0.248795	0.236141	4.77645	0.520905	0.470456	0.727068
sll0174	-0.128452	3.46042	0.0877369	0.767074	0.83777	-0.452311	3.46042	1.06	0.303215	0.399732	-0.679546	3.46042	2.15539	0.142071	0.201355	-0.551094	3.46042	1.39754	0.237136	0.503777
sll0175	-0.237752	2.81447	0.419662	0.517106	0.625856	-0.694234	2.81447	3.24548	0.0716207	0.11877	-0.487217	2.81447	1.46126	0.226729	0.29745	-0.249465	2.81447	0.363214	0.546726	0.780953
sll0176	-1.57938	2.16224	9.5184	0.00203422	0.0066545	-0.303322	2.16224	0.457583	0.498756	0.596267	-1.60578	2.16224	8.21762	0.00414855	0.00885624	-0.0263989	2.16224	0.00166258	0.967475	0.987448
sll0178	0.533958	7.13762	2.12257	0.145143	0.229222	0.126394	7.13762	0.118902	0.730228	0.794588	0.440344	7.13762	1.43436	0.231053	0.301904	-0.0936144	7.13762	0.0653433	0.798242	0.927663
sll0179	-0.770003	4.85191	6.68752	0.009709	0.0250597	-0.701642	4.85191	5.54226	0.0185626	0.0367656	-0.616618	4.85191	4.11916	0.0424002	0.0698141	0.153384	4.85191	0.241763	0.622935	0.831074
sll0180	-0.462	7.90787	2.1341	0.144055	0.22791	-0.397495	7.90787	1.58239	0.208416	0.292702	-0.461719	7.90787	2.12013	0.145374	0.20523	0.000280756	7.90787	7.87596e-07	0.999292	0.99979
sll0181	-0.162834	5.85586	0.218542	0.640153	0.733443	-0.72915	5.85586	4.26377	0.0389333	0.0700368	-0.934449	5.85586	6.75906	0.00932726	0.0183772	-0.771615	5.85586	4.60554	0.0318687	0.157172
sll0182	0.254434	6.00802	0.870179	0.350906	0.464489	-0.0197579	6.00802	0.00518315	0.942607	0.959225	-0.222396	6.00802	0.631168	0.426927	0.506109	-0.47683	6.00802	2.91265	0.0878874	0.285102
sll0183	-0.865729	6.0442	8.45383	0.00364275	0.0108514	-0.913854	6.0442	9.37477	0.00219992	0.00567366	-1.22617	6.0442	16.0556	6.15092e-05	0.000196769	-0.360438	6.0442	1.37871	0.240322	0.505986
sll0184	2.97101	8.04896	77.315	1.45758e-18	1.75288e-16	3.63364	8.04896	110.452	7.7997e-26	1.05523e-23	4.27845	8.04896	145.347	1.80315e-33	3.44402e-31	1.30744	8.04896	17.7488	2.52071e-05	0.000678918
sll0185	0.509717	8.49834	2.88799	0.0892424	0.155289	0.399706	8.49834	1.77782	0.182417	0.261777	0.792082	8.49834	6.91504	0.00854739	0.0169642	0.282365	8.49834	0.890235	0.345414	0.61862
sll0188	0.608321	6.7249	1.87621	0.170765	0.261052	0.618611	6.7249	1.94121	0.163537	0.239083	0.975859	6.7249	4.77157	0.0289334	0.050025	0.367538	6.7249	0.690511	0.405991	0.679862
sll0189	1.47803	3.36457	12.8177	0.000343347	0.00139008	1.05225	3.36457	6.21638	0.0126574	0.0262443	1.53764	3.36457	13.0273	0.00030699	0.000844075	0.0596041	3.36457	0.023674	0.877717	0.955794
sll0191	0.820659	6.1855	6.83497	0.00893899	0.0233883	0.877254	6.1855	7.79757	0.00523164	0.0120306	1.04205	6.1855	10.832	0.000997603	0.00245581	0.221386	6.1855	0.50851	0.475784	0.730436
sll0192	0.924146	2.84615	3.15062	0.0758982	0.136533	0.86013	2.84615	2.71931	0.099141	0.15604	1.09684	2.84615	4.29195	0.0382932	0.0642242	0.172697	2.84615	0.11843	0.730744	0.892337
sll0194	-0.164971	5.08485	0.279503	0.597027	0.696567	-0.214302	5.08485	0.466771	0.494477	0.591586	-0.104043	5.08485	0.1071	0.743471	0.79447	0.0609277	5.08485	0.0363181	0.84886	0.946135
sll0195	-0.331811	3.33214	0.776298	0.378276	0.493674	-0.232545	3.33214	0.387786	0.533465	0.62805	-0.0927963	3.33214	0.0571574	0.811047	0.850054	0.239015	3.33214	0.359145	0.548982	0.780953
sll0198	0.50519	4.20716	2.5051	0.113478	0.188859	0.38934	4.20716	1.47586	0.224424	0.312346	0.663413	4.20716	4.12729	0.042197	0.0695148	0.158224	4.20716	0.246769	0.61936	0.829303
sll0199	0.397262	12.3703	1.27874	0.258134	0.368584	0.843687	12.3703	5.70598	0.0169072	0.0339714	0.858121	12.3703	5.89916	0.0151481	0.0281868	0.46086	12.3703	1.71922	0.189794	0.441131
sll0202	0.28513	5.531	0.906923	0.340932	0.454063	0.101012	5.531	0.112881	0.736888	0.798623	-0.237227	5.531	0.589838	0.442482	0.51924	-0.522356	5.531	2.87826	0.0897832	0.2895
sll0204	-0.239189	5.2429	0.648662	0.420591	0.535133	-0.359315	5.2429	1.44607	0.22916	0.317577	-0.196862	5.2429	0.423413	0.515239	0.589493	0.0423271	5.2429	0.0192686	0.889599	0.958945
sll0205	0.561594	7.55833	3.20289	0.0735085	0.132896	0.65778	7.55833	4.38542	0.0362476	0.0657151	1.27362	7.55833	16.1211	5.9417e-05	0.000191017	0.712025	7.55833	5.16593	0.0230341	0.120529
sll0207	-0.630164	3.48844	2.05483	0.151724	0.236964	-0.760022	3.48844	2.97159	0.0847385	0.136821	-0.608448	3.48844	1.81417	0.178009	0.241334	0.0217162	3.48844	0.00223097	0.962327	0.987448
sll0208	0.859171	9.04825	7.39353	0.0065459	0.017826	1.13295	9.04825	12.7361	0.000358669	0.00112958	1.44237	9.04825	20.3309	6.51393e-06	2.47088e-05	0.583203	9.04825	3.44504	0.0634421	0.236068
sll0209	-1.56025	6.08839	13.2328	0.000275086	0.00114956	-1.05626	6.08839	6.23737	0.0125082	0.0259681	-1.38868	6.08839	10.4523	0.00122499	0.00296389	0.171568	6.08839	0.160714	0.6885	0.869256
sll0210	-0.904949	3.70796	5.67443	0.0172139	0.0408281	-0.980691	3.70796	6.58745	0.01027	0.021838	-1.74332	3.70796	16.8233	4.10271e-05	0.000136491	-0.838371	3.70796	3.62899	0.0567811	0.224224
sll0216	-0.210299	1.97625	0.182064	0.669606	0.759152	-0.443487	1.97625	0.770471	0.380071	0.478701	-1.45487	1.97625	5.56318	0.018342	0.0334025	-1.24457	1.97625	3.88431	0.0487392	0.202961
sll0217	-0.380277	5.38088	1.65464	0.198328	0.296017	-0.0643521	5.38088	0.048049	0.826494	0.873291	-0.416178	5.38088	1.88992	0.169211	0.231728	-0.0359014	5.38088	0.013808	0.906458	0.96469
sll0219	0.194353	4.14663	0.418687	0.517593	0.625931	0.281905	4.14663	0.889991	0.34548	0.442514	0.274407	4.14663	0.777131	0.37802	0.457144	0.0800543	4.14663	0.0672725	0.79535	0.92596
sll0220	-0.121299	6.16117	0.135673	0.712621	0.792696	-0.114685	6.16117	0.121312	0.727616	0.793786	-0.591012	6.16117	3.09294	0.0786326	0.120241	-0.469714	6.16117	1.9501	0.162576	0.405735
sll0221	-0.0757059	4.1084	0.0515789	0.820338	0.873429	0.288855	4.1084	0.779111	0.377413	0.475722	0.271618	4.1084	0.641406	0.423202	0.503163	0.347324	4.1084	1.03369	0.309294	0.582865
sll0222	-1.6978	5.16024	32.6787	1.08725e-08	1.50225e-07	-2.27404	5.16024	54.6171	1.46454e-13	3.08789e-12	-3.02047	5.16024	81.0328	2.22001e-19	6.2141e-18	-1.32267	5.16024	14.9179	0.000112292	0.0021833
sll0223	-0.0266828	9.35269	0.0118101	0.913461	0.941841	-0.501601	9.35269	4.14308	0.0418051	0.0743703	-1.04474	9.35269	17.5505	2.79776e-05	9.5124e-05	-1.01806	9.35269	16.6763	4.4332e-05	0.0010823
sll0224	-0.298643	6.14297	0.468891	0.493498	0.606331	-0.329899	6.14297	0.571758	0.449561	0.550217	-0.338563	6.14297	0.597273	0.439621	0.517004	-0.0399206	6.14297	0.0082752	0.927518	0.975275
sll0225	-1.30894	3.6365	15.6431	7.64902e-05	0.000380926	-1.99424	3.6365	32.182	1.40383e-08	1.15107e-07	-2.2822	3.6365	35.2204	2.94425e-09	1.93914e-08	-0.973259	3.6365	5.55657	0.0184114	0.103608
sll0226	-1.02665	6.13892	14.4436	0.000144423	0.000663285	-1.8359	6.13892	43.0713	5.27799e-11	6.73747e-10	-2.65243	6.13892	78.3328	8.7066e-19	2.2984e-17	-1.62578	6.13892	29.8515	4.66424e-08	4.09319e-06
sll0227	-0.332444	6.4928	1.45663	0.227466	0.331948	-0.560353	6.4928	4.08995	0.0431388	0.0761539	-0.323906	6.4928	1.35463	0.244471	0.316379	0.00853777	6.4928	0.000932881	0.975634	0.991513
sll0228	-0.239039	5.44616	0.797331	0.371893	0.487696	-0.488608	5.44616	3.26164	0.070918	0.117967	-0.535499	5.44616	3.7356	0.0532644	0.0853332	-0.296461	5.44616	1.12902	0.287984	0.559261
sll0230	0.0195151	3.84682	0.00365409	0.951798	0.966684	0.210619	3.84682	0.435171	0.509463	0.606165	0.268847	3.84682	0.656981	0.417628	0.497811	0.249332	3.84682	0.561529	0.453645	0.716432
sll0236	-0.111638	3.9145	0.114626	0.734938	0.811478	-0.0626852	3.9145	0.0362347	0.849032	0.890441	-0.412704	3.9145	1.36733	0.242271	0.313908	-0.301066	3.9145	0.715384	0.397662	0.672505
sll0237	-0.189297	2.99806	0.234714	0.62805	0.72238	-0.469435	2.99806	1.36861	0.242051	0.332884	-0.939121	2.99806	4.46472	0.0346017	0.0587	-0.749824	2.99806	2.7603	0.0966299	0.302753
sll0238	-0.445059	3.07243	1.16457	0.280521	0.393626	-0.761893	3.07243	3.24028	0.0718485	0.118966	-1.35051	3.07243	8.27355	0.00402269	0.00862156	-0.905455	3.07243	3.53045	0.0602515	0.229705
sll0240	0.80369	4.31278	5.72892	0.0166878	0.0398421	1.41117	4.31278	18.7584	1.48367e-05	6.59026e-05	2.04989	4.31278	39.4998	3.281e-10	2.51854e-09	1.2462	4.31278	16.3057	5.39003e-05	0.0012325
sll0241	1.06738	7.17457	8.30571	0.00395207	0.0115711	1.10959	7.17457	8.95364	0.00276917	0.00695936	0.957684	7.17457	6.65857	0.00986801	0.0192788	-0.109694	7.17457	0.089803	0.764428	0.907199
sll0242	2.49245	8.60816	71.2779	3.10296e-17	3.05312e-15	2.40543	8.60816	66.7483	3.08482e-16	9.66383e-15	2.52814	8.60816	72.942	1.33517e-17	2.96939e-16	0.0356905	8.60816	0.0165457	0.89765	0.962255
sll0243	2.09432	8.01339	31.8778	1.64183e-08	2.12391e-07	1.80281	8.01339	24.0167	9.55042e-07	5.56736e-06	1.63751	8.01339	19.9205	8.073e-06	3.01994e-05	-0.456817	8.01339	1.64394	0.199786	0.454316
sll0244	-0.810018	3.57091	5.92886	0.0148949	0.0363911	-0.540669	3.57091	2.76634	0.0962662	0.152179	-0.419775	3.57091	1.54035	0.214566	0.283671	0.390243	3.57091	1.17961	0.277436	0.54996
sll0245	-0.672347	4.83073	4.48002	0.0342932	0.0715158	-0.815268	4.83073	6.46661	0.010992	0.023191	-0.921711	4.83073	7.80148	0.00522034	0.0109146	-0.249364	4.83073	0.552069	0.457473	0.718496
sll0247	0.225595	5.48065	0.32924	0.566107	0.669148	0.663735	5.48065	2.87137	0.0901682	0.144296	1.42809	5.48065	13.0334	0.000305987	0.000843411	1.20249	5.48065	9.36369	0.00221326	0.0205059
sll0249	1.04348	2.38267	4.45286	0.0348429	0.0724294	0.568158	2.38267	1.21685	0.269979	0.365375	1.05672	2.38267	4.20648	0.0402699	0.0669831	0.0132356	2.38267	0.000819601	0.977161	0.992227
sll0250	-0.72972	4.01212	5.81103	0.015926	0.0384148	-0.315379	4.01212	1.14931	0.283693	0.378995	-0.199863	4.01212	0.433365	0.510342	0.584921	0.529857	4.01212	2.74865	0.0973363	0.304348
sll0252	-0.880801	5.53378	9.61359	0.00193143	0.00636039	-0.754837	5.53378	7.12474	0.00760273	0.016759	-0.653386	5.53378	5.16943	0.0229878	0.0407431	0.227416	5.53378	0.602018	0.437809	0.703397
sll0253	1.00377	8.72991	3.57794	0.0585516	0.110533	0.5079	8.72991	0.928748	0.335188	0.432231	0.231061	8.72991	0.192712	0.660669	0.722287	-0.77271	8.72991	2.13509	0.143962	0.380654
sll0254	0.800925	7.61737	6.62408	0.0100609	0.0258447	0.837402	7.61737	7.23474	0.00715061	0.0158919	0.302086	7.61737	0.940079	0.332258	0.409738	-0.498839	7.61737	2.57487	0.108573	0.322981
sll0257	0.0585687	2.64748	0.0141175	0.90542	0.937099	0.128689	2.64748	0.0682755	0.793864	0.845417	-0.273036	2.64748	0.265588	0.606307	0.674667	-0.331605	2.64748	0.392345	0.53107	0.771881
sll0258	-1.14135	8.99686	11.2124	0.000812541	0.00299562	-1.55131	8.99686	20.2727	6.71508e-06	3.21117e-05	-1.73584	8.99686	25.0158	5.68623e-07	2.62261e-06	-0.594488	8.99686	3.069	0.0797987	0.267949
sll0260	-1.27471	5.94711	18.5608	1.64569e-05	9.68038e-05	-1.42886	5.94711	22.9063	1.70091e-06	9.34491e-06	-1.92014	5.94711	38.3347	5.95939e-10	4.35814e-09	-0.645426	5.94711	4.33352	0.0373689	0.174084
sll0261	0.887457	4.04086	6.81798	0.00902447	0.023555	1.01419	4.04086	9.00852	0.00268724	0.00676917	1.29575	4.04086	14.1592	0.000167973	0.000489155	0.40829	4.04086	1.56775	0.210535	0.469188
sll0262	-1.64684	5.09421	32.4284	1.23666e-08	1.65927e-07	-2.24759	5.09421	55.6043	8.86302e-14	1.94448e-12	-2.57364	5.09421	64.9544	7.66521e-16	1.2634e-14	-0.926801	5.09421	7.96858	0.00475963	0.0371503
sll0263	-1.13404	4.65619	6.31423	0.0119773	0.030124	-0.836302	4.65619	3.4989	0.0614095	0.103744	-1.0768	4.65619	5.51705	0.018832	0.0341797	0.0572358	4.65619	0.015211	0.901844	0.962587
sll0264	1.18636	6.1829	21.0131	4.56147e-06	3.19204e-05	1.25422	6.1829	23.4634	1.2731e-06	7.18913e-06	1.29474	6.1829	24.4511	7.62194e-07	3.45167e-06	0.108372	6.1829	0.184574	0.667471	0.858022
sll0265	1.2536	4.15886	14.3901	0.000148578	0.000679481	0.757739	4.15886	5.00603	0.0252592	0.0481602	1.31756	4.15886	15.0389	0.000105318	0.0003217	0.0639548	4.15886	0.0406869	0.840144	0.944067
sll0266	-0.169381	3.05859	0.227228	0.633587	0.727203	0.067427	3.05859	0.0376004	0.846248	0.88832	-0.0466025	3.05859	0.0154979	0.900927	0.923685	0.122779	3.05859	0.102673	0.748646	0.899331
sll0267	1.46596	8.03041	32.1554	1.42323e-08	1.87516e-07	1.74344	8.03041	44.9605	2.0105e-11	2.80176e-10	2.1517	8.03041	66.7699	3.05121e-16	5.21436e-15	0.68574	8.03041	7.42222	0.00644232	0.0471131
sll0268	-0.145756	5.37223	0.253322	0.614746	0.710601	-0.172475	5.37223	0.354228	0.55173	0.644181	-0.286986	5.37223	0.933862	0.333861	0.411247	-0.14123	5.37223	0.224045	0.635975	0.840802
sll0269	-0.807378	2.37845	2.21845	0.13637	0.218663	-0.554385	2.37845	1.08414	0.297773	0.393677	-1.28804	2.37845	4.61907	0.0316184	0.0542626	-0.480667	2.37845	0.584118	0.444703	0.709209
sll0270	-0.877305	4.03636	6.6733	0.00978679	0.0252324	-0.989388	4.03636	8.31496	0.00393198	0.00946414	-0.809592	4.03636	5.29085	0.0214377	0.0384151	0.0677124	4.03636	0.0342409	0.853195	0.947444
sll0271	0.645014	5.02578	5.4379	0.0197043	0.0455698	0.982058	5.02578	12.8353	0.000340145	0.00107437	0.87291	5.02578	9.62212	0.00192247	0.00444606	0.227897	5.02578	0.694088	0.404777	0.679068
sll0272	-1.50685	3.75042	14.6488	0.000129515	0.000602485	-0.87441	3.75042	5.3621	0.020579	0.0402773	-1.09877	3.75042	7.617	0.00578207	0.0119506	0.408088	3.75042	0.91615	0.338488	0.614006
sll0273	-0.0773443	6.32051	0.080628	0.776448	0.842623	-0.136088	6.32051	0.248627	0.618044	0.698499	0.0468575	6.32051	0.0290798	0.864595	0.892318	0.124202	6.32051	0.203321	0.652054	0.851999
sll0274	1.75977	6.28926	37.3859	9.69207e-10	1.65632e-08	2.07448	6.28926	51.7089	6.43713e-13	1.17423e-11	2.40245	6.28926	67.9009	1.71925e-16	3.0842e-15	0.642678	6.28926	5.63658	0.0175895	0.0998063
sll0282	0.774009	2.18618	1.52565	0.216766	0.318912	0.948361	2.18618	2.33245	0.126702	0.192244	-0.138569	2.18618	0.0387778	0.84389	0.876554	-0.912579	2.18618	1.85649	0.17303	0.421478
sll0283	-1.45282	5.96227	19.7441	8.85341e-06	5.7265e-05	-1.95198	5.96227	33.938	5.6896e-09	5.03504e-08	-2.48173	5.96227	50.4652	1.21299e-12	1.23466e-11	-1.0289	5.96227	8.89946	0.00285255	0.025033
sll0284	-0.21272	4.84542	0.618152	0.431735	0.546102	-0.284471	4.84542	1.09573	0.295205	0.390836	-0.482215	4.84542	2.88884	0.0891953	0.134455	-0.269494	4.84542	0.884401	0.346999	0.620775
sll0286	0.100435	3.47193	0.0769941	0.781413	0.846031	0.18473	3.47193	0.264195	0.607252	0.689423	0.149848	3.47193	0.157971	0.691031	0.749731	0.0494128	3.47193	0.0172496	0.895508	0.961228
sll0288	-1.23944	4.17824	13.7073	0.000213622	0.000918714	-1.01394	4.17824	9.43016	0.00213445	0.00552237	-1.46143	4.17824	17.1234	3.50276e-05	0.000117494	-0.22199	4.17824	0.358377	0.549409	0.780953
sll0289	-1.12279	4.29808	8.61772	0.00332909	0.00997192	-1.55167	4.29808	15.6993	7.42502e-05	0.000279687	-1.59588	4.29808	15.7102	7.38234e-05	0.000231599	-0.473088	4.29808	1.3222	0.250197	0.520096
sll0290	0.549017	4.91917	4.13751	0.0419428	0.0839631	0.762604	4.91917	8.08818	0.00445549	0.0104985	1.10536	4.91917	16.6563	4.48004e-05	0.000147983	0.556339	4.91917	4.4569	0.0347606	0.167365
sll0293	-0.977121	5.4232	10.4074	0.00125514	0.00435877	-1.143	5.4232	14.0461	0.000178382	0.000610978	-0.996202	5.4232	10.3756	0.00127692	0.00307349	-0.019081	5.4232	0.00369141	0.951553	0.985335
sll0294	-0.653786	4.61267	4.09678	0.042965	0.0859036	-1.00105	4.61267	9.28909	0.00230523	0.00592174	-1.14692	4.61267	11.2908	0.000778912	0.00196311	-0.493133	4.61267	2.01992	0.155248	0.395675
sll0295	-0.598556	2.65579	1.97997	0.159393	0.24657	-1.50332	2.65579	10.6874	0.00107867	0.00299098	-1.41953	2.65579	8.4021	0.00374789	0.00806989	-0.820972	2.65579	2.58084	0.108164	0.322591
sll0296	-1.50938	4.15105	22.8119	1.78653e-06	1.42178e-05	-1.80552	4.15105	31.0273	2.54428e-08	2.02133e-07	-2.23449	4.15105	40.1455	2.35735e-10	1.84887e-09	-0.725113	4.15105	3.72568	0.0535818	0.216933
sll0297	0.432643	5.00551	1.57376	0.209662	0.310146	0.402411	5.00551	1.35871	0.243761	0.33481	0.427625	5.00551	1.48007	0.223763	0.293915	-0.00501801	5.00551	0.000209875	0.988441	0.995802
sll0298	0.490744	6.10674	2.45573	0.117096	0.193295	0.435982	6.10674	1.93831	0.163852	0.239436	0.688221	6.10674	4.75561	0.0292029	0.0504633	0.197477	6.10674	0.398987	0.527613	0.769959
sll0300	-0.0827744	3.24453	0.0597923	0.806825	0.864322	0.0496656	3.24453	0.0220759	0.881885	0.916314	-0.315439	3.24453	0.733169	0.391858	0.471595	-0.232664	3.24453	0.389151	0.532746	0.772831
sll0301	-0.56617	4.08106	3.28732	0.069817	0.127932	-0.553431	4.08106	3.14154	0.0763217	0.125034	0.15083	4.08106	0.236476	0.626763	0.692682	0.717	4.08106	4.96461	0.0258711	0.131461
sll0306	1.38099	10.1798	23.9213	1.00357e-06	8.42012e-06	1.61871	10.1798	32.4673	1.21215e-08	1.00919e-07	2.15552	10.1798	55.6315	8.74112e-14	1.03585e-12	0.774536	10.1798	7.74498	0.00538621	0.0405778
sll0309	-0.466313	2.56661	0.967439	0.32532	0.4406	-0.617066	2.56661	1.65084	0.198844	0.281819	-0.355627	2.56661	0.513653	0.473562	0.548508	0.110686	2.56661	0.0463738	0.829498	0.940754
sll0312	-1.06427	3.23695	5.05321	0.0245804	0.0548103	-0.954632	3.23695	4.13252	0.0420667	0.0746804	-0.552289	3.23695	1.33545	0.247838	0.319592	0.511977	3.23695	1.04443	0.306794	0.57986
sll0314	0.213629	8.52563	0.629101	0.427685	0.542459	0.696764	8.52563	6.66033	0.00985829	0.021073	1.06991	8.52563	15.4946	8.27405e-05	0.000257829	0.856279	8.52563	10.0114	0.00155578	0.0160369
sll0318	0.147408	4.83438	0.253856	0.614373	0.710424	0.329369	4.83438	1.27999	0.257901	0.350598	0.330595	4.83438	1.22367	0.268642	0.342071	0.183188	4.83438	0.377988	0.538682	0.776688
sll0319	-1.21193	6.16415	12.517	0.000403262	0.00160268	-1.24812	6.16415	13.2537	0.00027204	0.000885085	-1.5642	6.16415	19.9576	7.91787e-06	2.96874e-05	-0.352271	6.16415	1.02265	0.311892	0.585383
sll0320	-1.36576	4.72919	22.9793	1.63757e-06	1.31614e-05	-1.89077	4.72919	41.1949	1.37782e-10	1.60351e-09	-2.04913	4.72919	43.3993	4.46357e-11	3.79403e-10	-0.683371	4.72919	4.45446	0.0348102	0.167365
sll0321	0.29795	5.26096	1.03511	0.308962	0.423113	0.175755	5.26096	0.356092	0.550685	0.643655	0.343226	5.26096	1.32045	0.250511	0.322018	0.0452753	5.26096	0.0232952	0.878692	0.955817
sll0322	0.1149	3.89637	0.103265	0.747946	0.820744	0.136288	3.89637	0.14464	0.703711	0.772726	-0.393675	3.89637	1.06111	0.302963	0.379962	-0.508575	3.89637	1.77353	0.182946	0.433596
sll0325	0.661215	4.80209	4.48618	0.0341699	0.0713242	0.76066	4.80209	5.92865	0.0148966	0.0303446	0.0984039	4.80209	0.0903183	0.763773	0.810448	-0.562811	4.80209	3.07744	0.0793855	0.26745
sll0327	-0.508565	4.42605	1.8844	0.169834	0.260242	0.126995	4.42605	0.122788	0.72603	0.79241	-0.0168306	4.42605	0.00204687	0.963914	0.968987	0.491734	4.42605	1.6836	0.194447	0.445883
sll0329	0.886359	10.1558	10.99	0.000916061	0.0033123	1.08707	10.1558	16.4118	5.09677e-05	0.00019987	0.893066	10.1558	11.1365	0.00084647	0.00211422	0.00670736	10.1558	0.000639319	0.979828	0.992227
sll0330	0.64222	5.49987	2.43815	0.118416	0.19478	1.35697	5.49987	10.9377	0.000942264	0.00264437	2.59499	5.49987	38.1311	6.6146e-10	4.81561e-09	1.95277	5.49987	22.9494	1.66325e-06	8.06054e-05
sll0335	0.907091	5.32425	4.34098	0.0372055	0.0758833	1.67871	5.32425	14.7785	0.000120904	0.000434744	2.12171	5.32425	23.0778	1.55575e-06	6.56894e-06	1.21462	5.32425	8.12604	0.00436339	0.0346072
sll0336	-0.789968	5.55607	5.97139	0.0145398	0.0356576	-0.887144	5.55607	7.48571	0.00621907	0.0140622	-0.917463	5.55607	7.73611	0.00541273	0.0112878	-0.127496	5.55607	0.146865	0.701549	0.87625
sll0337	-0.0912363	3.67283	0.0485646	0.82558	0.876605	-0.282071	3.67283	0.454529	0.500192	0.597233	-0.636759	3.67283	2.07104	0.150119	0.210152	-0.545523	3.67283	1.50489	0.21992	0.480862
sll0350	-0.624311	6.31694	4.14996	0.0416354	0.0835539	-0.917945	6.31694	8.83788	0.00295042	0.00734663	-1.26035	6.31694	15.946	6.51756e-05	0.00020707	-0.636037	6.31694	4.07747	0.0434588	0.191466
sll0354	-0.928306	3.97367	7.02491	0.00803836	0.0213066	-0.938205	3.97367	7.12527	0.00760051	0.016759	-0.824875	3.97367	5.18604	0.022769	0.0404121	0.10343	3.97367	0.0748652	0.78438	0.920117
sll0355	0.664761	4.71505	3.37826	0.0660617	0.122293	0.639209	4.71505	3.12739	0.076987	0.125933	0.647928	4.71505	3.09248	0.0786547	0.120241	-0.0168331	4.71505	0.00217149	0.962833	0.987448
sll0359	0.47938	10.1802	2.76008	0.0966432	0.165594	0.639805	10.1802	4.9007	0.0268459	0.0507384	0.43574	10.1802	2.27864	0.131167	0.187703	-0.0436394	10.1802	0.0229596	0.879562	0.956123
sll0360	0.707527	5.06346	5.26757	0.0217263	0.0495752	1.08654	5.06346	12.583	0.000389264	0.00121533	0.840371	5.06346	7.18787	0.00733982	0.0147295	0.132844	5.06346	0.188643	0.664048	0.858022
sll0362	0.316085	6.19269	1.45822	0.227214	0.331729	0.264526	6.19269	1.01893	0.312772	0.410001	0.496683	6.19269	3.53875	0.0599508	0.0947251	0.180598	6.19269	0.473567	0.491351	0.739858
sll0368	-0.961757	5.66389	9.91965	0.00163523	0.00547946	-0.955639	5.66389	9.76688	0.00177684	0.00470587	-0.850241	5.66389	7.56261	0.00595915	0.0122552	0.111516	5.66389	0.126582	0.722003	0.886657
sll0370	-1.51583	5.75318	34.3212	4.67256e-09	6.8035e-08	-1.85583	5.75318	49.4342	2.05136e-12	3.34712e-11	-1.80172	5.75318	44.758	2.22958e-11	1.96724e-10	-0.285891	5.75318	1.08514	0.29755	0.569326
sll0371	-1.45505	4.29477	11.1059	0.000860531	0.00314302	-1.49777	4.29477	11.6717	0.000634568	0.00187313	-1.5563	4.29477	11.9674	0.000541386	0.00141739	-0.101248	4.29477	0.0485612	0.825586	0.937145
sll0372	-1.13043	6.41977	10.0464	0.00152646	0.00517913	-1.04702	6.41977	8.63649	0.00329495	0.00809895	-0.830236	6.41977	5.43352	0.0197538	0.0356336	0.300193	6.41977	0.703885	0.401481	0.6772
sll0373	-1.60489	4.0116	23.59	1.19202e-06	9.87373e-06	-1.28623	4.0116	15.9208	6.60485e-05	0.000251713	-1.14929	4.0116	11.9853	0.000536209	0.00140863	0.455605	4.0116	1.59157	0.207103	0.464408
sll0374	-2.96362	3.13849	37.2135	1.0588e-09	1.79996e-08	-2.32402	3.13849	25.4287	4.59041e-07	2.83366e-06	-3.92479	3.13849	47.8281	4.65282e-12	4.44344e-11	-0.961178	3.13849	2.03275	0.153942	0.393621
sll0376	2.66634	9.78432	40.7048	1.77048e-10	3.54861e-09	3.29354	9.78432	58.9671	1.60328e-14	3.88496e-13	3.63187	9.78432	69.5693	7.37776e-17	1.44311e-15	0.965521	9.78432	5.97374	0.0145205	0.0871498
sll0377	1.60598	6.85954	33.1086	8.71537e-09	1.21978e-07	2.48937	6.85954	77.1656	1.57207e-18	7.18945e-17	2.06445	6.85954	53.4801	2.61229e-13	2.95544e-12	0.458473	6.85954	2.95311	0.0857126	0.28134
sll0378	-0.397475	2.83292	0.817539	0.365901	0.481063	0.232835	2.83292	0.309217	0.578161	0.66547	-0.110536	2.83292	0.0596197	0.807098	0.847283	0.286939	2.83292	0.375434	0.540057	0.777934
sll0379	-1.26732	3.7617	10.4855	0.00120313	0.00420965	-1.44423	3.7617	13.3144	0.000263382	0.000859499	-1.35455	3.7617	10.9469	0.0009376	0.00232396	-0.0872227	3.7617	0.0413047	0.838951	0.943851
sll0380	-1.61063	2.76514	13.9141	0.000191363	0.00084538	-1.09236	2.76514	6.99342	0.008181	0.01784	-1.78202	2.76514	14.4018	0.000147665	0.000439072	-0.17139	2.76514	0.104192	0.746856	0.899235
sll0381	-0.641734	4.94774	3.11452	0.0775973	0.139203	-0.940736	4.94774	6.53242	0.0105926	0.0224358	-0.885411	4.94774	5.5716	0.0182541	0.0332796	-0.243677	4.94774	0.414211	0.51984	0.765801
sll0382	-1.16435	2.22421	4.63253	0.0313712	0.0665332	-1.59918	2.22421	8.21893	0.00414557	0.00989028	-1.56932	2.22421	6.93706	0.00844278	0.0167771	-0.404973	2.22421	0.399548	0.527323	0.769959
sll0383	-1.3532	2.30273	8.31067	0.00394128	0.0115665	-1.9664	2.30273	15.3749	8.81502e-05	0.000326739	-2.0059	2.30273	13.5599	0.000231069	0.000653555	-0.652706	2.30273	1.1621	0.28103	0.55404
sll0385	-0.724334	2.95109	1.78573	0.181447	0.274922	-0.354551	2.95109	0.440683	0.506793	0.603653	-1.11383	2.95109	3.71759	0.0538419	0.0860358	-0.389493	2.95109	0.431722	0.511145	0.758073
sll0394	0.0793233	4.89703	0.0802493	0.77696	0.842797	0.259837	4.89703	0.872965	0.350136	0.447595	0.0604002	4.89703	0.0436853	0.83444	0.86916	-0.0189231	4.89703	0.00430291	0.947699	0.985335
sll0395	-0.496721	4.23514	3.02504	0.0819882	0.145473	-0.886611	4.23514	9.06209	0.00260964	0.0065993	-0.611021	4.23514	4.14712	0.0417054	0.0688797	-0.1143	4.23514	0.137033	0.711248	0.882273
sll0396	0.279435	4.49207	0.783557	0.376055	0.491369	-9.06681e-05	4.49207	9.83486e-08	0.99975	0.99975	-0.436139	4.49207	1.67028	0.196221	0.262842	-0.715574	4.49207	4.55788	0.0327677	0.160397
sll0397	0.351082	3.37334	1.12707	0.2884	0.401559	0.341939	3.37334	1.06771	0.301464	0.397585	-0.112053	3.37334	0.0937663	0.759443	0.806872	-0.463135	3.37334	1.67693	0.195333	0.447051
sll0398	0.618013	2.95836	2.08073	0.149169	0.234325	0.511742	2.95836	1.4078	0.235422	0.325144	-0.295213	2.95836	0.373374	0.541171	0.613904	-0.913226	2.95836	3.85405	0.0496261	0.205793
sll0400	-0.324724	5.53355	0.750664	0.386266	0.500681	-0.365953	5.53355	0.953244	0.328895	0.425806	-0.645268	5.53355	2.85399	0.0911476	0.136953	-0.320545	5.53355	0.700793	0.402517	0.677414
sll0401	1.11481	7.38326	18.2626	1.92447e-05	0.000110598	1.35876	7.38326	26.9652	2.07152e-07	1.38685e-06	1.76837	7.38326	44.7226	2.27017e-11	1.98686e-10	0.653569	7.38326	6.52605	0.0106306	0.0686232
sll0402	0.196816	6.19349	0.572478	0.449276	0.563243	0.17929	6.19349	0.473483	0.491389	0.588543	0.436685	6.19349	2.76491	0.0963519	0.14404	0.23987	6.19349	0.840154	0.359353	0.63715
sll0403	-0.185157	4.56155	0.225573	0.634826	0.72811	-0.901396	4.56155	5.05193	0.0245986	0.0471497	-0.961914	4.56155	5.47504	0.0192899	0.0349132	-0.776757	4.56155	3.54522	0.0597173	0.229705
sll0404	-0.677732	5.47424	7.08039	0.00779322	0.0207797	-0.739035	5.47424	8.35446	0.00384741	0.00928813	-0.880733	5.47424	11.1072	0.000859931	0.00214619	-0.203001	5.47424	0.570267	0.450153	0.712998
sll0405	0.485149	6.71787	2.48481	0.11495	0.19043	0.392275	6.71787	1.62247	0.202747	0.286826	0.579935	6.71787	3.51312	0.0608847	0.0961073	0.0947852	6.71787	0.0950957	0.757796	0.902948
sll0406	0.866489	3.39158	4.8374	0.0278489	0.0603239	0.947969	3.39158	5.80283	0.0160004	0.03241	0.698604	3.39158	2.82631	0.0927312	0.139075	-0.167885	3.39158	0.182092	0.669582	0.859001
sll0408	-0.704227	8.03045	5.7939	0.0160819	0.0386983	-1.066	8.03045	13.0751	0.000299251	0.000959198	-1.72614	8.03045	32.6537	1.10131e-08	6.60989e-08	-1.02191	8.03045	11.7616	0.000604648	0.0077295
sll0409	-0.596932	1.80739	1.18841	0.27565	0.387126	-0.746591	1.80739	1.81916	0.177414	0.2558	-1.00504	1.80739	2.62805	0.104991	0.155098	-0.408106	1.80739	0.387892	0.533409	0.773205
sll0410	0.623367	4.69405	3.324	0.0682754	0.12539	1.15318	4.69405	11.6776	0.000632564	0.00186891	1.1238	4.69405	10.6778	0.00108428	0.0026491	0.50043	4.69405	2.23083	0.135281	0.36673
sll0412	1.11665	4.15181	12.1366	0.000494426	0.00191804	0.869496	4.15181	7.19036	0.00732965	0.0162453	1.19163	4.15181	13.1347	0.000289882	0.000803798	0.074982	4.15181	0.0593565	0.807516	0.929765
sll0413	-1.32036	4.95349	18.0936	2.10312e-05	0.000119385	-1.11469	4.95349	13.1733	0.000283969	0.000917706	-1.98419	4.95349	35.4921	2.56084e-09	1.69695e-08	-0.663835	4.95349	3.78517	0.0517086	0.211725
sll0414	-0.30915	4.87788	0.806789	0.369071	0.484583	0.0892081	4.87788	0.0687436	0.793175	0.845238	0.12797	4.87788	0.137049	0.711232	0.766724	0.437121	4.87788	1.56321	0.211196	0.470016
sll0415	1.38522	6.12877	25.4978	4.42879e-07	4.09694e-06	1.36049	6.12877	24.5817	7.12234e-07	4.27472e-06	1.65914	6.12877	35.8419	2.14e-09	1.43566e-08	0.273927	6.12877	1.07435	0.299965	0.57226
sll0416	-0.534364	8.82513	4.80971	0.0282998	0.060975	0.16004	8.82513	0.436205	0.50896	0.605789	1.02402	8.82513	17.5629	2.77957e-05	9.46528e-05	1.55838	8.82513	39.4928	3.29273e-10	5.38133e-08
sll0418	-1.16897	5.36008	14.8896	0.000113988	0.000537964	-1.12925	5.36008	13.8928	0.000193543	0.000655985	-1.76552	5.36008	30.4011	3.51337e-08	1.97711e-07	-0.596554	5.36008	3.38931	0.0656205	0.239695
sll0419	-1.36278	2.35303	5.21588	0.0223815	0.0507137	-1.76061	2.35303	8.02135	0.0046229	0.0108379	-2.48533	2.35303	12.6597	0.000373626	0.00101266	-1.12255	2.35303	2.29316	0.129946	0.358655
sll0420	-1.02879	4.17758	8.2945	0.00397652	0.0116322	-1.27528	4.17758	12.2875	0.000456012	0.00139213	-1.53155	4.17758	16.0025	6.32594e-05	0.000201573	-0.502758	4.17758	1.6261	0.202243	0.457727
sll0421	-1.73704	5.25919	29.6775	5.10244e-08	6.06872e-07	-1.9088	5.25919	34.9339	3.41088e-09	3.11976e-08	-2.09061	5.25919	39.4213	3.41548e-10	2.61558e-09	-0.353572	5.25919	1.08856	0.29679	0.569127
sll0422	-2.80106	3.00408	45.9716	1.19981e-11	3.06756e-10	-2.94766	3.00408	48.9423	2.63608e-12	4.17529e-11	-2.80103	3.00408	39.5116	3.26124e-10	2.5093e-09	2.53071e-05	3.00408	7.31119e-08	0.999784	0.99979
sll0423	0.331542	4.58099	0.854133	0.355386	0.469271	0.472649	4.58099	1.75394	0.185383	0.265288	0.74775	4.58099	4.29433	0.0382396	0.0641674	0.416208	4.58099	1.35824	0.243842	0.509495
sll0424	-0.488761	4.18518	2.35731	0.124697	0.203458	-0.0205146	4.18518	0.00436223	0.94734	0.961855	0.109876	4.18518	0.118068	0.73114	0.784278	0.598637	4.18518	3.30082	0.0692451	0.248236
sll0426	1.10576	8.21652	11.4113	0.000730004	0.00272138	1.71005	8.21652	26.5942	2.50993e-07	1.6365e-06	2.04362	8.21652	37.1782	1.07812e-09	7.54451e-09	0.937856	8.21652	8.36359	0.00382814	0.031568
sll0427	-2.49	10.7467	51.764	6.25886e-13	2.11693e-11	-3.50822	10.7467	94.0452	3.08395e-22	2.38419e-20	-3.93348	10.7467	113.381	1.78041e-26	1.20437e-24	-1.44349	10.7467	18.4741	1.72227e-05	0.000513047
sll0428	0.586639	4.94293	2.15337	0.142258	0.225432	0.616092	4.94293	2.36667	0.123951	0.188953	0.639839	4.94293	2.49644	0.114104	0.16704	0.0532003	4.94293	0.0177155	0.894115	0.960685
sll0430	0.754427	7.93895	6.45531	0.0110621	0.0280396	1.09408	7.93895	13.4575	0.000244025	0.000803598	1.06036	7.93895	12.5896	0.000387896	0.00104871	0.305932	7.93895	1.0755	0.299707	0.572242
sll0441	-2.00406	5.55337	21.4525	3.62708e-06	2.62297e-05	-2.65347	5.55337	35.1802	3.00562e-09	2.78836e-08	-2.93045	5.55337	40.6165	1.85238e-10	1.46699e-09	-0.926381	5.55337	4.28757	0.038392	0.176821
sll0442	-1.47235	2.33594	9.04955	0.00262759	0.00827525	-1.65909	2.33594	10.9748	0.000923605	0.00260099	-2.00347	2.33594	12.8602	0.000335636	0.000917349	-0.531118	2.33594	0.726312	0.394081	0.669324
sll0443	-0.758832	5.57164	5.87129	0.0153898	0.0373752	-1.20203	5.57164	14.1991	0.000164452	0.00056927	-1.80546	5.57164	29.0739	6.96698e-08	3.74533e-07	-1.04662	5.57164	9.76073	0.00178279	0.0174886
sll0444	-0.140291	4.73938	0.150852	0.697722	0.780939	-0.321156	4.73938	0.777444	0.377924	0.476181	-1.0417	4.73938	7.37114	0.00662791	0.0134673	-0.901408	4.73938	5.48142	0.0192197	0.106809
sll0445	0.0118017	5.04405	0.00149517	0.969156	0.978802	-0.326292	5.04405	1.11311	0.291406	0.387151	-0.52105	5.04405	2.6587	0.102985	0.152621	-0.532852	5.04405	2.77339	0.0958432	0.301261
sll0446	-0.778145	7.45843	7.41046	0.00648458	0.0177085	-1.40675	7.45843	23.3804	1.32928e-06	7.48035e-06	-1.35255	7.45843	21.4421	3.64667e-06	1.4493e-05	-0.574408	7.45843	3.93165	0.0473855	0.201796
sll0447	-1.07334	3.43864	5.66822	0.017275	0.040943	-2.01225	3.43864	17.4704	2.9181e-05	0.00012101	-2.58093	3.43864	23.9812	9.72798e-07	4.30924e-06	-1.50758	3.43864	7.75589	0.00535376	0.040475
sll0448	-0.326558	3.12221	0.574761	0.448373	0.562328	-1.63139	3.12221	12.2232	0.000472001	0.00143232	-3.83955	3.12221	36.9854	1.19018e-09	8.29293e-09	-3.51299	3.12221	29.9718	4.38368e-08	3.95384e-06
sll0449	-0.430618	2.75419	1.07107	0.300704	0.415306	-1.40426	2.75419	9.4597	0.00210035	0.00544281	-0.598947	2.75419	1.79614	0.180179	0.243971	-0.168329	2.75419	0.133459	0.714872	0.883711
sll0450	-0.414421	7.9379	2.53721	0.111191	0.186476	-0.788799	7.9379	9.07445	0.00259205	0.00656505	-1.83137	7.9379	45.3145	1.678e-11	1.50927e-10	-1.41694	7.9379	27.5909	1.49878e-07	1.05795e-05
sll0451	-0.243448	2.58272	0.275161	0.599891	0.698153	-0.448127	2.58272	0.901438	0.342396	0.440127	-0.745428	2.58272	2.09034	0.148233	0.208361	-0.50198	2.58272	0.913591	0.339163	0.614202
sll0454	-0.765259	4.71085	6.03005	0.0140643	0.0346749	-0.971816	4.71085	9.49527	0.00206002	0.00535111	-1.05009	4.71085	10.3353	0.00130513	0.00313213	-0.28483	4.71085	0.727928	0.393556	0.669324
sll0455	0.90726	7.421	9.925	0.00163049	0.00546922	0.94605	7.421	10.7773	0.00102751	0.00285155	0.927542	7.421	10.285	0.00134114	0.00320434	0.0202826	7.421	0.0050508	0.943343	0.983039
sll0456	1.21208	5.05005	17.0157	3.70723e-05	0.000199956	1.39193	5.05005	22.5105	2.08996e-06	1.1348e-05	1.21171	5.05005	16.2565	5.53206e-05	0.000179626	-0.000369548	5.05005	1.75591e-06	0.998943	0.99979
sll0459	1.79316	6.37685	36.5668	1.47526e-09	2.43156e-08	1.90656	6.37685	41.1257	1.42747e-10	1.64946e-09	2.4005	6.37685	63.6779	1.46516e-15	2.32068e-14	0.607344	6.37685	4.69625	0.0302285	0.151236
sll0461	1.0886	8.81899	16.7352	4.29759e-05	0.000227639	1.09003	8.81899	16.7691	4.22162e-05	0.000168605	1.01706	8.81899	14.5868	0.000133846	0.000400857	-0.0715436	8.81899	0.0740624	0.785511	0.921012
sll0462	0.943167	5.86102	11.6768	0.000632841	0.00239592	1.12432	5.86102	16.581	4.66154e-05	0.000184136	0.966221	5.86102	11.913	0.000557447	0.00145151	0.0230536	5.86102	0.00716185	0.932557	0.977996
sll0467	-1.62092	1.68035	8.23565	0.00410755	0.0119509	-1.58813	1.68035	8.0393	0.00457733	0.0107466	-3.08928	1.68035	16.9374	3.86334e-05	0.000128924	-1.46836	1.68035	2.77706	0.0956235	0.301122
sll0469	0.0062852	8.37415	0.000701307	0.978873	0.985813	0.166287	8.37415	0.491222	0.483383	0.580667	0.443981	8.37415	3.48105	0.0620754	0.0977202	0.437696	8.37415	3.38151	0.0659315	0.240539
sll0470	0.707043	8.6697	4.74186	0.0294372	0.0629661	0.369433	8.6697	1.30124	0.253986	0.34651	0.659471	8.6697	4.11736	0.0424453	0.0698529	-0.0475712	8.6697	0.02166	0.882995	0.957576
sll0471	-0.22573	4.03414	0.378793	0.53825	0.644352	-0.41817	4.03414	1.27282	0.259239	0.352196	-0.312617	4.03414	0.672085	0.412326	0.49312	-0.0868867	4.03414	0.0508596	0.821574	0.93503
sll0473	2.48096	7.75839	69.4102	7.99758e-17	7.34803e-15	2.50309	7.75839	70.5129	4.57266e-17	1.81066e-15	2.8996	7.75839	91.96	8.84471e-22	3.2635e-20	0.418639	7.75839	2.2702	0.131883	0.361847
sll0474	0.435128	3.48169	1.70742	0.191321	0.287335	-0.41158	3.48169	1.3346	0.247989	0.339326	0.0400024	3.48169	0.0121779	0.912129	0.929885	-0.395126	3.48169	1.25555	0.262496	0.534372
sll0477	0.406032	5.45932	1.57152	0.209987	0.310486	0.896403	5.45932	7.72949	0.00543261	0.012457	0.977975	5.45932	9.03977	0.00264169	0.00592782	0.571943	5.45932	3.16196	0.0753725	0.260633
sll0480	-1.33779	5.67961	28.3478	1.01361e-07	1.09706e-06	-1.46637	5.67961	33.4732	7.2254e-09	6.28625e-08	-0.988927	5.67961	15.3142	9.10296e-05	0.000281767	0.348862	5.67961	1.78741	0.181242	0.431727
sll0481	-0.465256	5.5289	1.75464	0.185294	0.279837	-0.863541	5.5289	5.88821	0.0152426	0.0310104	-1.10391	5.5289	9.22946	0.00238152	0.00540756	-0.638654	5.5289	3.08398	0.079067	0.267396
sll0482	0.261826	5.10383	0.700096	0.402751	0.516686	0.368056	5.10383	1.38709	0.238897	0.329482	0.310296	5.10383	0.946577	0.330592	0.407839	0.0484705	5.10383	0.0233989	0.878424	0.955817
sll0484	1.85219	5.28952	32.4306	1.23526e-08	1.65927e-07	1.99097	5.28952	37.3791	9.72598e-10	9.6872e-09	2.49153	5.28952	57.6142	3.18913e-14	4.10917e-13	0.639336	5.28952	4.59324	0.0320982	0.157914
sll0485	-0.290906	5.56552	0.747901	0.387142	0.501216	-0.224564	5.56552	0.446443	0.504029	0.600801	-0.203992	5.56552	0.360374	0.548298	0.620322	0.0869145	5.56552	0.0647432	0.79915	0.927723
sll0486	-0.654303	2.83582	1.57995	0.208768	0.309335	-0.801809	2.83582	2.33995	0.126093	0.19141	-0.770157	2.83582	1.9996	0.15734	0.21814	-0.115854	2.83582	0.0425864	0.836506	0.943851
sll0487	-1.11415	4.30428	13.0178	0.000308551	0.0012714	-1.54755	4.30428	23.6134	1.17762e-06	6.73194e-06	-1.66027	4.30428	24.5135	7.37896e-07	3.3463e-06	-0.546117	4.30428	2.44204	0.118122	0.337924
sll0488	-0.0189614	4.07916	0.00321344	0.954794	0.968279	0.446482	4.07916	1.86361	0.172208	0.249767	0.91571	4.07916	7.73826	0.00540627	0.0112816	0.934671	4.07916	7.98268	0.00472269	0.0369508
sll0489	-0.844749	2.82635	4.27052	0.0387792	0.0785502	-0.81165	2.82635	3.93052	0.0474173	0.0827318	-1.1342	2.82635	6.35574	0.0117002	0.0223869	-0.289454	2.82635	0.364881	0.545808	0.780953
sll0493	-0.107739	4.96938	0.165551	0.684097	0.771539	-0.160376	4.96938	0.363733	0.54644	0.640076	-0.393106	4.96938	2.00851	0.156419	0.217233	-0.285367	4.96938	1.04437	0.306806	0.57986
sll0494	1.53499	6.70215	22.5568	2.04026e-06	1.58108e-05	0.991467	6.70215	9.51961	0.00203287	0.00530606	1.01308	6.70215	9.82855	0.00171824	0.00400511	-0.521915	6.70215	2.715	0.0994092	0.30879
sll0495	-1.95171	4.40589	21.509	3.52178e-06	2.56395e-05	-1.83336	4.40589	19.2206	1.16448e-05	5.28822e-05	-1.59284	4.40589	14.2169	0.000162897	0.000476512	0.35887	4.40589	0.668542	0.41356	0.687221
sll0496	-1.43545	4.16967	17.1967	3.37025e-05	0.000183303	-1.20244	4.16967	12.3773	0.000434574	0.00133497	-1.93791	4.16967	26.6956	2.38166e-07	1.18973e-06	-0.502466	4.16967	1.62185	0.202834	0.457844
sll0497	0.0756651	3.89725	0.0599309	0.806605	0.864322	0.0825358	3.89725	0.0715426	0.789104	0.842015	0.0909751	3.89725	0.0792984	0.77825	0.823925	0.01531	3.89725	0.00224857	0.962179	0.987448
sll0498	1.43616	6.20042	27.3785	1.67277e-07	1.7134e-06	1.89856	6.20042	47.7869	4.75157e-12	7.24335e-11	2.30497	6.20042	68.9137	1.02869e-16	1.93072e-15	0.868808	6.20042	11.1518	0.000839515	0.00994855
sll0499	-0.0630716	3.86727	0.0388738	0.843699	0.890891	-0.0911462	3.86727	0.0802601	0.776945	0.8314	-0.34047	3.86727	0.994798	0.318573	0.395859	-0.277399	3.86727	0.650222	0.420033	0.694424
sll0501	-0.643045	4.07287	4.24164	0.0394441	0.0796981	-0.951358	4.07287	8.82441	0.00297227	0.00739537	-1.02814	4.07287	9.41494	0.00215225	0.00492138	-0.38509	4.07287	1.2392	0.265626	0.538381
sll0502	0.644513	5.81965	5.89505	0.0151835	0.0369849	0.76623	5.81965	8.34394	0.00386975	0.00933513	0.906567	5.81965	11.3966	0.000735803	0.00186653	0.262055	5.81965	0.991392	0.319402	0.593306
sll0503	-0.259157	2.60178	0.257575	0.611791	0.708447	-0.936611	2.60178	3.07236	0.0796336	0.129804	-0.826821	2.60178	2.21539	0.136641	0.194764	-0.567665	2.60178	1.01154	0.314535	0.588533
sll0504	0.118466	6.05886	0.0854002	0.770108	0.83932	0.264625	6.05886	0.42708	0.513425	0.610433	0.160224	6.05886	0.154724	0.694062	0.751231	0.0417577	6.05886	0.0105247	0.918289	0.9706
sll0505	-0.106001	4.67141	0.100632	0.751073	0.823259	-0.0723372	4.67141	0.0470252	0.828323	0.873803	-0.145321	4.67141	0.17973	0.671605	0.730798	-0.03932	4.67141	0.0130003	0.909223	0.966998
sll0506	0.51709	4.4353	2.96901	0.0848736	0.149612	0.513036	4.4353	2.90381	0.0883706	0.141768	-0.148414	4.4353	0.211123	0.645888	0.709712	-0.665503	4.4353	4.42157	0.0354874	0.169215
sll0507	-0.665848	4.29537	5.56528	0.0183201	0.0428877	-1.08772	4.29537	13.9657	0.000186176	0.000633662	-1.0537	4.29537	11.9756	0.000539006	0.00141369	-0.387855	4.29537	1.51783	0.217949	0.478485
sll0508	-0.0855814	4.74766	0.0486316	0.825462	0.876605	0.0168339	4.74766	0.00187622	0.96545	0.974756	-0.375013	4.74766	0.880915	0.347951	0.426339	-0.289432	4.74766	0.52163	0.470147	0.727068
sll0509	0.109245	3.40715	0.0975802	0.754753	0.826816	0.421134	3.40715	1.52127	0.217427	0.304173	0.373113	3.40715	1.07471	0.299883	0.376827	0.263868	3.40715	0.541544	0.461794	0.721584
sll0513	-1.32893	5.31765	19.9719	7.85869e-06	5.22893e-05	-1.25429	5.31765	17.862	2.37521e-05	0.000100551	-1.56288	5.31765	25.7192	3.94872e-07	1.89561e-06	-0.233944	5.31765	0.552534	0.457284	0.718496
sll0514	-0.559931	6.72623	3.7069	0.0541879	0.103927	-0.70194	6.72623	5.77485	0.0162571	0.0329096	-0.6919	6.72623	5.52473	0.0187495	0.0340491	-0.131968	6.72623	0.200232	0.654534	0.852923
sll0517	-2.3536	9.16169	49.2321	2.27397e-12	7.0996e-11	-2.59192	9.16169	58.5255	2.00677e-14	4.7562e-13	-3.08073	9.16169	78.8671	6.64331e-19	1.79757e-17	-0.727125	9.16169	5.02451	0.024991	0.12799
sll0518	-1.3836	5.18065	16.3848	5.16971e-05	0.000269872	-1.36293	5.18065	15.9545	6.48826e-05	0.000247852	-1.57987	5.18065	20.1844	7.03232e-06	2.65203e-05	-0.196273	5.18065	0.302467	0.58234	0.802251
sll0519	-1.3957	7.11403	22.2744	2.3634e-06	1.79962e-05	-1.85789	7.11403	38.1312	6.61428e-10	6.83968e-09	-2.1768	7.11403	50.1675	1.4117e-12	1.42353e-11	-0.781101	7.11403	6.74356	0.00940868	0.0629897
sll0520	-1.63572	5.49253	28.0144	1.20417e-07	1.27776e-06	-1.83787	5.49253	34.4254	4.42897e-09	3.99468e-08	-2.10371	5.49253	42.0659	8.82499e-11	7.25437e-10	-0.467994	5.49253	2.03877	0.153333	0.393575
sll0521	-1.61826	6.42705	35.5532	2.48178e-09	3.9309e-08	-2.18629	6.42705	61.3631	4.74633e-15	1.23291e-13	-2.27471	6.42705	63.6874	1.45814e-15	2.32068e-14	-0.656449	6.42705	5.39026	0.0202494	0.11055
sll0522	-1.52117	3.69341	16.3767	5.1919e-05	0.000270595	-1.91151	3.69341	24.3459	8.04959e-07	4.787e-06	-2.55425	3.69341	34.9546	3.37479e-09	2.18286e-08	-1.03308	3.69341	5.07069	0.0243337	0.125423
sll0524	-0.313526	4.79056	0.796241	0.37222	0.487731	-0.380535	4.79056	1.16303	0.280838	0.376382	-0.261716	4.79056	0.532962	0.465364	0.540042	0.0518098	4.79056	0.0205	0.88615	0.958661
sll0525	0.797101	5.99885	6.10631	0.01347	0.0334293	0.924425	5.99885	8.18727	0.00421854	0.0100275	1.54812	5.99885	22.5531	2.04416e-06	8.46606e-06	0.751014	5.99885	5.58688	0.0180955	0.102007
sll0528	2.07944	8.89338	62.7143	2.38973e-15	1.55189e-13	2.49328	8.89338	87.8112	7.20085e-21	4.87108e-19	2.71017	8.89338	101.969	5.63955e-24	2.77449e-22	0.630729	8.89338	6.31085	0.0120002	0.0755126
sll0529	-1.36516	6.0172	22.7599	1.83552e-06	1.4572e-05	-1.60668	6.0172	30.8713	2.7572e-08	2.17826e-07	-1.75015	6.0172	34.8821	3.50292e-09	2.25227e-08	-0.38499	6.0172	1.67665	0.19537	0.447051
sll0533	-0.401899	5.54603	1.82209	0.177064	0.269161	-0.270228	5.54603	0.83042	0.362151	0.460494	-0.181335	5.54603	0.363417	0.546614	0.618633	0.220564	5.54603	0.526793	0.467958	0.725926
sll0534	0.575423	6.0417	3.56447	0.0590285	0.111252	0.519639	6.0417	2.90479	0.0883165	0.141768	0.467097	6.0417	2.29513	0.129781	0.185883	-0.108326	6.0417	0.12593	0.72269	0.886657
sll0535	0.400153	6.63412	2.42417	0.119476	0.196326	0.187162	6.63412	0.527853	0.467511	0.567056	0.384906	6.63412	2.19868	0.138129	0.196627	-0.0152465	6.63412	0.00348878	0.9529	0.985335
sll0536	1.46894	4.04749	18.5678	1.63964e-05	9.66227e-05	1.50229	4.04749	19.3688	1.07751e-05	4.91386e-05	1.46749	4.04749	17.4285	2.98323e-05	0.000101112	-0.00144678	4.04749	1.99205e-05	0.996439	0.997976
sll0537	-0.634186	2.55648	2.51874	0.112501	0.187966	-0.232731	2.55648	0.368556	0.543792	0.637521	-1.08965	2.55648	5.67255	0.0172324	0.0315943	-0.455466	2.55648	0.864439	0.3525	0.628882
sll0539	2.22569	8.65059	37.7485	8.04791e-10	1.39741e-08	2.4261	8.65059	44.2298	2.92006e-11	3.93421e-10	3.00584	8.65059	64.9183	7.80676e-16	1.28023e-14	0.78015	8.65059	5.07598	0.0242596	0.125423
sll0540	0.703628	4.73159	5.26417	0.0217688	0.0496022	1.51716	4.73159	26.2151	3.05423e-07	1.92939e-06	2.11124	4.73159	50.4869	1.19962e-12	1.22876e-11	1.40761	4.73159	24.5724	7.15689e-07	4.0146e-05
sll0541	-0.0841314	11.6033	0.0735399	0.786251	0.849852	-0.247276	11.6033	0.63447	0.425721	0.526195	0.13368	11.6033	0.185574	0.666626	0.726354	0.217811	11.6033	0.492322	0.482894	0.734867
sll0542	-0.641112	6.83549	3.55452	0.0593833	0.111739	-0.733668	6.83549	4.63739	0.0312825	0.0577127	-1.09635	6.83549	10.0544	0.00151981	0.00358895	-0.455242	6.83549	1.74746	0.186196	0.436519
sll0543	-1.5805	8.555	20.086	7.40353e-06	5.00818e-05	-3.07724	8.555	67.7229	1.88166e-16	6.04926e-15	-4.30862	8.555	116.584	3.54053e-27	2.49915e-25	-2.72812	8.555	53.0681	3.22187e-13	1.74357e-10
sll0544	0.760043	5.72253	8.42536	0.00370023	0.0109924	1.14061	5.72253	19.1389	1.21543e-05	5.49652e-05	0.775854	5.72253	8.46834	0.0036138	0.00781227	0.0158112	5.72253	0.00369692	0.951517	0.985335
sll0545	-1.3365	3.6488	13.1584	0.000286231	0.00119153	-1.20646	3.6488	10.9137	0.000954552	0.00267192	-1.75288	3.6488	18.977	1.32305e-05	4.75213e-05	-0.416378	3.6488	0.94294	0.331523	0.607949
sll0546	0.344677	4.7828	1.37252	0.24138	0.348959	0.639848	4.7828	4.81475	0.0282171	0.0527822	0.575736	4.7828	3.69734	0.0544993	0.0869579	0.231059	4.7828	0.610573	0.434572	0.703132
sll0547	0.298602	4.87802	1.04478	0.306711	0.421452	0.472298	4.87802	2.64405	0.103938	0.16257	0.288562	4.87802	0.929335	0.335036	0.412422	-0.0100398	4.87802	0.0011411	0.973052	0.990442
sll0549	2.32832	6.64983	56.595	5.35487e-14	2.44891e-12	2.96945	6.64983	90.0153	2.36321e-21	1.70519e-19	3.28477	6.64983	107.666	3.18167e-25	1.81244e-23	0.95645	6.64983	11.3717	0.000745721	0.00910285
sll0550	1.02934	8.83851	17.0812	3.58152e-05	0.000193497	1.14285	8.83851	20.9701	4.6651e-06	2.31261e-05	1.48994	8.83851	35.0424	3.22599e-09	2.09496e-08	0.460595	8.83851	3.4991	0.0614023	0.23156
sll0553	0.00559873	5.72692	0.0003059	0.986046	0.990929	0.0619233	5.72692	0.0374943	0.846462	0.88832	0.0804377	5.72692	0.0617379	0.80377	0.844609	0.074839	5.72692	0.053318	0.817387	0.933756
sll0554	-0.900607	3.87926	4.04189	0.0443842	0.0881979	-0.257137	3.87926	0.346058	0.556353	0.647716	-1.10006	3.87926	5.61947	0.0177621	0.0324738	-0.199452	3.87926	0.175943	0.674883	0.862375
sll0555	-1.42286	5.59524	21.0244	4.5346e-06	3.1801e-05	-1.41798	5.59524	20.9146	4.80228e-06	2.37223e-05	-1.83982	5.59524	32.3114	1.31343e-08	7.81085e-08	-0.416954	5.59524	1.63341	0.201232	0.456474
sll0556	-0.799344	5.91597	9.92788	0.00162794	0.00546922	-0.920918	5.91597	13.0257	0.000307238	0.000978042	-0.984993	5.91597	14.254	0.000159719	0.000471032	-0.185649	5.91597	0.494004	0.482147	0.734646
sll0558	0.323468	4.96592	1.1484	0.283885	0.396522	0.752834	4.96592	6.38714	0.011495	0.0240802	0.911737	4.96592	9.07368	0.00259314	0.00583098	0.588269	4.96592	3.87064	0.0491378	0.20429
sll0563	-0.123969	4.27708	0.160033	0.689126	0.775595	-0.317094	4.27708	1.02021	0.312469	0.409898	0.20608	4.27708	0.427854	0.513044	0.587603	0.330049	4.27708	1.07746	0.299266	0.571934
sll0564	-0.434659	4.52595	1.15005	0.283539	0.396522	-0.369724	4.52595	0.837788	0.36003	0.458618	-0.803433	4.52595	3.67805	0.0551332	0.087926	-0.368774	4.52595	0.761459	0.382872	0.660633
sll0565	-0.465488	2.58062	1.09476	0.295419	0.409052	-0.244868	2.58062	0.316227	0.573884	0.66219	-0.340784	2.58062	0.536101	0.464053	0.539291	0.124703	2.58062	0.0663114	0.796785	0.926966
sll0567	-0.43022	3.23734	1.20097	0.273128	0.384749	-0.116177	3.23734	0.0913588	0.762457	0.820039	-1.04196	3.23734	5.67554	0.017203	0.0315583	-0.611744	3.23734	1.85111	0.173654	0.421813
sll0569	-0.238182	6.82949	0.632296	0.426514	0.541185	-0.280322	6.82949	0.874111	0.34982	0.447367	-0.271557	6.82949	0.81017	0.36807	0.447612	-0.0333742	6.82949	0.0121884	0.912091	0.968147
sll0572	3.5277	9.83246	102.553	4.1988e-24	1.23941e-21	3.98783	9.83246	125.832	3.34575e-29	7.24244e-27	3.70149	9.83246	111.141	5.51016e-26	3.50814e-24	0.173796	9.83246	0.307076	0.57948	0.80101
sll0573	3.81351	8.8311	149.628	2.09095e-34	1.69733e-31	4.62456	8.8311	206.393	8.40941e-47	1.36527e-43	4.66431	8.8311	209.047	2.21698e-47	1.02836e-44	0.850799	8.8311	9.67866	0.00186421	0.018123
sll0574	-1.79297	3.71779	18.9922	1.31252e-05	7.9659e-05	-1.4773	3.71779	13.3283	0.000261437	0.000854869	-1.55487	3.71779	13.6307	0.000222513	0.000631555	0.238096	3.71779	0.27803	0.597995	0.813444
sll0575	-1.37628	2.61332	9.2639	0.00233715	0.00746922	-0.992359	2.61332	5.112	0.0237609	0.045706	-1.91928	2.61332	14.1105	0.000172381	0.000501094	-0.543002	2.61332	0.916576	0.338376	0.614006
sll0576	-1.50984	5.31596	10.863	0.000981048	0.00351985	-2.17934	5.31596	21.4133	3.702e-06	1.86363e-05	-2.20438	5.31596	21.3085	3.90988e-06	1.53457e-05	-0.694543	5.31596	2.18065	0.139756	0.373795
sll0577	-1.10001	5.64378	12.5761	0.000390716	0.00155596	-1.00618	5.64378	10.5975	0.00113238	0.00313188	-0.821391	5.64378	6.94383	0.00841091	0.0167342	0.27862	5.64378	0.771916	0.379625	0.658111
sll0578	-0.117806	3.58216	0.11399	0.735646	0.811636	0.0678045	3.58216	0.0389719	0.843504	0.886362	-0.312464	3.58216	0.711648	0.398897	0.479356	-0.194658	3.58216	0.270156	0.603227	0.816116
sll0584	0.699787	5.00666	4.99735	0.0253861	0.0560793	0.776742	5.00666	6.15725	0.0130875	0.0270841	0.684879	5.00666	4.58084	0.0323315	0.0552818	-0.014908	5.00666	0.00228006	0.961916	0.987448
sll0585	0.645351	3.99518	3.66354	0.0556153	0.106038	0.873795	3.99518	6.83778	0.00892497	0.0192554	0.572964	3.99518	2.66645	0.102485	0.151949	-0.0723863	3.99518	0.0455805	0.83094	0.94177
sll0586	1.30948	4.16913	13.7543	0.000208342	0.000903187	1.29828	4.16913	13.5051	0.000237922	0.000785893	1.41367	4.16913	15.2548	9.39392e-05	0.000290496	0.104187	4.16913	0.0956061	0.757168	0.902948
sll0587	-0.200623	5.00495	0.52933	0.466889	0.580394	-0.149426	5.00495	0.29438	0.587428	0.672559	0.0250852	5.00495	0.0080177	0.928651	0.942154	0.225708	5.00495	0.635906	0.425197	0.697272
sll0588	-1.1471	7.1889	12.1154	0.000500068	0.00193531	-1.59737	7.1889	22.7999	1.79772e-06	9.84352e-06	-1.70731	7.1889	25.552	4.30609e-07	2.04413e-06	-0.560212	7.1889	2.83856	0.0920265	0.293757
sll0590	-0.201784	5.69834	0.531312	0.466056	0.579802	-0.763075	5.69834	7.3212	0.00681457	0.0152599	-0.948434	5.69834	10.7173	0.00106138	0.00260099	-0.74665	5.69834	6.60347	0.010178	0.0666435
sll0593	0.127828	4.38257	0.152845	0.695831	0.779629	0.112285	4.38257	0.118084	0.731122	0.795133	0.197975	4.38257	0.350724	0.553704	0.625479	0.0701461	4.38257	0.044241	0.833406	0.943539
sll0594	0.301957	4.16547	0.91903	0.33773	0.451279	0.685815	4.16547	4.92427	0.026482	0.0501383	0.808305	4.16547	6.53847	0.0105566	0.0205008	0.506348	4.16547	2.64211	0.104065	0.315657
sll0595	1.33276	3.0254	7.64918	0.00567982	0.0158168	1.38075	3.0254	8.28158	0.00400492	0.00960453	1.63723	3.0254	11.2218	0.00080841	0.00202852	0.304467	3.0254	0.463797	0.495855	0.743668
sll0596	-0.748747	2.83527	3.07918	0.0793006	0.141633	-0.82469	2.83527	3.68655	0.0548529	0.094137	-0.650772	2.83527	2.12081	0.14531	0.205229	0.0979754	2.83527	0.0431276	0.835485	0.943851
sll0597	-1.13234	4.13424	12.054	0.000516804	0.0019907	-1.5346	4.13424	20.9588	4.69257e-06	2.32268e-05	-2.01566	4.13424	30.7063	3.00191e-08	1.70704e-07	-0.883312	4.13424	5.43542	0.0197324	0.108411
sll0601	-0.632726	4.05333	3.36649	0.0665352	0.1231	-0.366973	4.05333	1.16188	0.281077	0.376508	-0.474249	4.05333	1.80184	0.179491	0.24314	0.158478	4.05333	0.189194	0.663588	0.858022
sll0602	0.55162	6.65744	4.67912	0.0305314	0.0650068	0.314061	6.65744	1.51125	0.218948	0.305774	0.147575	6.65744	0.32556	0.568285	0.64048	-0.404045	6.65744	2.46665	0.116285	0.335545
sll0603	-0.628854	4.47935	5.36868	0.0205015	0.0471447	-0.854731	4.47935	9.58889	0.00195758	0.00513331	-1.54708	4.47935	25.8401	3.70903e-07	1.79749e-06	-0.918231	4.47935	8.6062	0.00335021	0.0284025
sll0606	0.32616	4.72751	1.14832	0.283901	0.396522	0.364849	4.72751	1.44109	0.229963	0.318283	0.151322	4.72751	0.23244	0.629721	0.695241	-0.174838	4.72751	0.316132	0.573941	0.798452
sll0608	0.144436	3.9388	0.136104	0.712185	0.792696	0.383342	3.9388	0.967341	0.325344	0.422388	-0.00226644	3.9388	3.22264e-05	0.995471	0.996084	-0.146702	3.9388	0.130715	0.717692	0.883711
sll0609	0.248161	2.46196	0.260043	0.61009	0.706982	-0.0543077	2.46196	0.0118739	0.913228	0.938397	0.490499	2.46196	0.959291	0.327365	0.405022	0.242338	2.46196	0.239998	0.624208	0.832007
sll0611	1.4606	7.66948	19.6133	9.48074e-06	6.05983e-05	2.21117	7.66948	43.3755	4.51821e-11	5.89181e-10	2.63328	7.66948	59.6983	1.10574e-14	1.53433e-13	1.17268	7.66948	13.1915	0.000281222	0.00432761
sll0613	-0.446198	2.30113	1.04886	0.30577	0.420515	-1.40752	2.30113	8.47364	0.0036033	0.00875088	-0.746477	2.30113	2.4228	0.119581	0.174024	-0.30028	2.30113	0.359809	0.548613	0.780953
sll0614	0.609481	2.81197	1.9783	0.15957	0.246725	0.769743	2.81197	3.25249	0.0713149	0.118384	0.763915	2.81197	2.90268	0.0884324	0.133553	0.154435	2.81197	0.130084	0.718345	0.88418
sll0615	-2.05607	4.55743	28.7866	8.08094e-08	9.04786e-07	-2.45281	4.55743	38.5973	5.209e-10	5.4873e-09	-2.98635	4.55743	50.1964	1.39103e-12	1.40706e-11	-0.930282	4.55743	4.62438	0.0315207	0.156018
sll0616	-0.0858184	6.90077	0.105628	0.745177	0.818742	0.165759	6.90077	0.395923	0.529202	0.624843	0.296919	6.90077	1.25701	0.262218	0.334546	0.382738	6.90077	2.07868	0.14937	0.387973
sll0617	0.242196	7.50756	0.708043	0.400094	0.514388	0.414451	7.50756	2.07293	0.149934	0.22149	0.410801	7.50756	2.01932	0.155309	0.215969	0.168606	7.50756	0.341798	0.558793	0.788084
sll0621	0.278099	6.05835	0.925377	0.336067	0.450486	0.366364	6.05835	1.60538	0.205143	0.289608	0.449709	6.05835	2.37165	0.123557	0.178544	0.17161	6.05835	0.348887	0.554744	0.785874
sll0622	0.738803	4.33154	4.58761	0.032204	0.0679885	1.1405	4.33154	11.2618	0.000791182	0.00227141	1.34078	4.33154	15.1136	0.000101233	0.000310685	0.601979	4.33154	3.28845	0.069769	0.249468
sll0623	0.544651	6.22983	2.85956	0.0908322	0.157478	0.965879	6.22983	8.97901	0.00273099	0.00687405	0.950798	6.22983	8.59257	0.00337538	0.00736054	0.406147	6.22983	1.61029	0.204451	0.460428
sll0624	-0.0901406	7.9652	0.05253	0.818718	0.873317	-0.358437	7.9652	0.82691	0.363168	0.461168	-0.449134	7.9652	1.29148	0.255776	0.32769	-0.358993	7.9652	0.825602	0.363547	0.642457
sll0625	0.064125	5.53993	0.0437408	0.834337	0.883015	-0.0405438	5.53993	0.0173813	0.895112	0.926205	-0.245662	5.53993	0.612975	0.43367	0.511488	-0.309787	5.53993	0.974437	0.323576	0.599345
sll0626	0.457463	3.86414	1.89228	0.168945	0.259123	0.118942	3.86414	0.123837	0.724909	0.791719	-0.106357	3.86414	0.0882097	0.766466	0.813039	-0.56382	3.86414	2.58131	0.108132	0.322591
sll0629	-1.74641	7.04997	16.4289	5.05101e-05	0.000264526	-2.54355	7.04997	32.7642	1.04044e-08	8.75213e-08	-3.25535	7.04997	49.6734	1.81594e-12	1.8087e-11	-1.50894	7.04997	11.8591	0.000573817	0.00742611
sll0630	-1.66245	7.25201	15.6434	7.64792e-05	0.000380926	-2.36665	7.25201	30.0891	4.12654e-08	3.13058e-07	-3.33962	7.25201	54.205	1.80631e-13	2.07981e-12	-1.67717	7.25201	15.1938	9.70207e-05	0.00192089
sll0631	-1.13912	4.28836	11.9671	0.000541482	0.0020807	-1.16395	4.28836	12.3896	0.000431737	0.00132877	-1.45623	4.28836	17.3196	3.15917e-05	0.00010663	-0.317114	4.28836	0.757478	0.384119	0.661312
sll0634	-0.487497	5.32447	3.13601	0.0765807	0.137608	-0.483039	5.32447	3.07137	0.0796821	0.129818	-0.464021	5.32447	2.72215	0.0989647	0.147268	0.0234765	5.32447	0.00677673	0.934392	0.978076
sll0635	-0.047877	4.53601	0.0316404	0.858819	0.903332	0.00802136	4.53601	0.000887207	0.976238	0.983202	-0.0505737	4.53601	0.0325933	0.856732	0.886208	-0.00269669	4.53601	9.19357e-05	0.99235	0.997527
sll0638	0.567036	5.61784	3.58281	0.0583804	0.110338	0.387438	5.61784	1.66363	0.197113	0.279732	0.579676	5.61784	3.65168	0.0560126	0.0891534	0.0126398	5.61784	0.00178231	0.966325	0.987448
sll0639	1.51031	7.23323	29.0963	6.8867e-08	7.87364e-07	2.02628	7.23323	51.4358	7.39786e-13	1.32712e-11	2.28888	7.23323	64.4093	1.01081e-15	1.64929e-14	0.778566	7.23323	8.29804	0.00396878	0.0322973
sll0640	-1.41609	4.51402	22.4023	2.21107e-06	1.70127e-05	-2.07817	4.51402	43.6532	3.92029e-11	5.15351e-10	-2.14553	4.51402	42.8343	5.95771e-11	4.97293e-10	-0.729438	4.51402	4.53921	0.0331269	0.161264
sll0641	-1.41791	5.01884	21.5571	3.43452e-06	2.51258e-05	-1.99088	5.01884	39.6244	3.0782e-10	3.39963e-09	-2.00444	5.01884	37.9218	7.36381e-10	5.32523e-09	-0.586533	5.01884	3.10656	0.0779776	0.265613
sll0643	-0.392973	4.45502	1.46195	0.226621	0.331011	-0.324117	4.45502	0.997893	0.317821	0.414944	-0.486152	4.45502	2.07872	0.149365	0.209408	-0.0931792	4.45502	0.073921	0.785711	0.921012
sll0644	-0.943327	2.67556	4.30512	0.0379979	0.0772085	-0.943023	2.67556	4.32733	0.037505	0.0678056	-1.17225	2.67556	5.73833	0.0165986	0.0305877	-0.228923	2.67556	0.191637	0.661557	0.858022
sll0645	-0.0942742	4.72334	0.106634	0.74401	0.818742	0.221268	4.72334	0.603979	0.437064	0.538371	0.403734	4.72334	1.93563	0.164144	0.226124	0.498008	4.72334	2.89884	0.0886433	0.286678
sll0646	0.359568	4.96577	1.66453	0.196992	0.294491	0.338731	4.96577	1.47688	0.224264	0.312258	0.188695	4.96577	0.426813	0.513557	0.587983	-0.170873	4.96577	0.358149	0.549536	0.780953
sll0647	0.828702	4.78776	7.33222	0.00677295	0.0183724	1.16261	4.78776	14.7037	0.000125798	0.000449853	1.16807	4.78776	14.2103	0.000163473	0.000477335	0.339367	4.78776	1.29796	0.254585	0.52352
sll0648	-0.521915	5.59225	2.25571	0.133123	0.214836	-0.56652	5.59225	2.65126	0.103468	0.161986	-0.470006	5.59225	1.79316	0.180542	0.244258	0.0519096	5.59225	0.021562	0.883258	0.957576
sll0649	-1.91786	2.56343	10.2323	0.00138005	0.00473182	-1.52182	2.56343	6.78708	0.00918198	0.0197312	-1.36763	2.56343	5.17157	0.0229595	0.0407151	0.550239	2.56343	0.701877	0.402154	0.677414
sll0654	0.658128	6.08785	5.56818	0.0182897	0.0428476	0.866995	6.08785	9.6673	0.00187577	0.00493968	1.04654	6.08785	13.8211	0.000201066	0.000576733	0.388408	6.08785	1.97641	0.159769	0.403272
sll0656	0.778449	7.14591	8.19384	0.00420328	0.0121857	1.23074	7.14591	20.3311	6.51323e-06	3.12847e-05	1.66797	7.14591	36.5809	1.46462e-09	1.01184e-08	0.889517	7.14591	10.9237	0.000949408	0.0110492
sll0657	-1.02281	4.23571	11.4504	0.000714778	0.00267075	-1.08068	4.23571	12.684	0.000368799	0.0011563	-0.467856	4.23571	2.39867	0.121438	0.17611	0.554952	4.23571	3.01787	0.0823518	0.272654
sll0658	0.51272	3.63056	1.23295	0.266835	0.377851	0.536258	3.63056	1.33639	0.247672	0.339268	0.784571	3.63056	2.78731	0.0950136	0.142236	0.271852	3.63056	0.347685	0.555426	0.785874
sll0659	-0.559143	3.54092	2.04786	0.152421	0.237503	-0.950826	3.54092	5.58579	0.0181068	0.036047	-0.697316	3.54092	2.89108	0.0890711	0.134331	-0.138173	3.54092	0.107759	0.74271	0.898223
sll0660	-0.496486	1.94549	0.964959	0.325941	0.440787	-0.849847	1.94549	2.62299	0.105326	0.164499	-0.938011	1.94549	2.68557	0.101261	0.15034	-0.441525	1.94549	0.538919	0.462881	0.72189
sll0661	-1.00588	4.98682	12.0803	0.000509585	0.00196745	-1.34332	4.98682	20.7142	5.3318e-06	2.59945e-05	-0.999294	4.98682	11.2894	0.000779506	0.00196311	0.00658851	4.98682	0.000464567	0.982804	0.993204
sll0662	-0.230456	6.02375	0.372521	0.541634	0.647289	-0.32217	6.02375	0.724435	0.394693	0.494623	-0.164496	6.02375	0.187174	0.665279	0.725617	0.0659599	6.02375	0.0299326	0.862643	0.951061
sll0664	-0.258074	3.38675	0.283188	0.594619	0.694506	-1.00506	3.38675	3.99461	0.045646	0.0801148	-0.817251	3.38675	2.51877	0.112499	0.165085	-0.559177	3.38675	1.16251	0.280947	0.55404
sll0670	1.92393	4.29735	31.174	2.3591e-08	2.96899e-07	2.02927	4.29735	34.7969	3.65962e-09	3.32851e-08	1.80307	4.29735	25.7487	3.8888e-07	1.87343e-06	-0.120855	4.29735	0.147021	0.701399	0.87625
sll0671	0.80435	3.36719	2.18529	0.139334	0.222101	0.64403	3.36719	1.38667	0.238969	0.329482	0.614935	3.36719	1.20488	0.272348	0.346247	-0.189415	3.36719	0.120255	0.728758	0.890918
sll0672	-1.62317	4.17312	14.977	0.000108828	0.00051889	-1.86508	4.17312	19.0925	1.24531e-05	5.61599e-05	-2.90509	4.17312	37.7939	7.86257e-10	5.6607e-09	-1.28192	4.17312	7.05229	0.00791641	0.0553978
sll0676	-0.508738	3.78485	2.05223	0.151983	0.237141	-0.491152	3.78485	1.91072	0.166884	0.242774	-0.743812	3.78485	3.94649	0.0469691	0.0762544	-0.235074	3.78485	0.373683	0.541003	0.778395
sll0679	-1.19232	4.56245	10.3758	0.0012768	0.00442926	-1.30693	4.56245	12.2962	0.00045387	0.00138768	-1.76507	4.56245	20.2452	6.81259e-06	2.57514e-05	-0.572749	4.56245	2.05861	0.151348	0.389711
sll0680	-0.246556	7.90297	0.227713	0.633225	0.727044	0.00345542	7.90297	4.48225e-05	0.994658	0.995885	0.0392056	7.90297	0.00576097	0.939498	0.950031	0.285762	7.90297	0.305265	0.580601	0.801274
sll0681	-0.271849	5.54554	0.487287	0.48514	0.598954	-0.374181	5.54554	0.920691	0.337294	0.434255	-0.699913	5.54554	3.11087	0.0777715	0.119284	-0.428064	5.54554	1.15966	0.281536	0.554365
sll0682	0.243205	5.28673	0.4562	0.499405	0.612606	0.631441	5.28673	3.10551	0.0780278	0.127443	0.709045	5.28673	3.82994	0.0503446	0.0809653	0.46584	5.28673	1.67076	0.196156	0.448219
sll0683	-0.323063	4.20748	0.941655	0.331853	0.44655	-0.004219	4.20748	0.000163444	0.9898	0.993778	-0.183269	4.20748	0.28782	0.591621	0.66126	0.139794	4.20748	0.161727	0.687571	0.868694
sll0684	-0.406145	4.1304	1.63456	0.201074	0.299489	-0.473322	4.1304	2.2009	0.13793	0.206137	-0.757923	4.1304	5.00127	0.0253287	0.0444794	-0.351778	4.1304	1.03268	0.30953	0.582972
sll0685	1.03987	4.58529	8.78676	0.00303425	0.00932975	1.54606	4.58529	19.9249	8.05446e-06	3.76842e-05	1.91809	4.58529	30.1243	4.05214e-08	2.24911e-07	0.878224	4.58529	7.08461	0.00777489	0.0547615
sll0686	0.688713	4.44496	4.87193	0.027297	0.0592865	1.04583	4.44496	11.6203	0.000652374	0.00192045	1.63389	4.44496	28.18	1.10541e-07	5.76125e-07	0.945177	4.44496	10.2738	0.00134931	0.0142247
sll0687	1.20399	2.43241	4.03794	0.0444881	0.0883503	1.75999	2.43241	9.41445	0.00215282	0.00556102	2.41121	2.43241	17.7434	2.52795e-05	8.67682e-05	1.20722	2.43241	5.46889	0.0193579	0.107079
sll0688	0.791468	2.78736	2.79682	0.0944512	0.162266	1.22647	2.78736	7.1679	0.00742196	0.0164275	1.51369	2.78736	10.4342	0.001237	0.00299073	0.72222	2.78736	2.69376	0.100742	0.310939
sll0689	0.195277	7.4748	0.538639	0.462997	0.57729	0.200478	7.4748	0.567012	0.451449	0.552319	0.143922	7.4748	0.289352	0.590636	0.660625	-0.0513553	7.4748	0.0369046	0.847659	0.946135
sll0690	0.520821	3.9116	1.57807	0.209039	0.309507	0.685455	3.9116	2.74088	0.0978107	0.154395	0.489162	3.9116	1.31311	0.251833	0.323202	-0.0316586	3.9116	0.00572973	0.939662	0.98074
sll0691	-0.00402277	4.89453	0.000155297	0.990057	0.993116	0.213461	4.89453	0.439735	0.50725	0.603976	0.249262	4.89453	0.580125	0.446263	0.522922	0.253285	4.89453	0.595592	0.440265	0.706091
sll0696	-0.312018	3.12554	0.684091	0.408181	0.522209	-0.464738	3.12554	1.47838	0.224029	0.312064	-0.487225	3.12554	1.45493	0.227738	0.298532	-0.175207	3.12554	0.178492	0.672672	0.860428
sll0698	-0.0208772	6.13122	0.00695964	0.933514	0.956491	-0.262353	6.13122	1.08344	0.29793	0.393723	-0.183312	6.13122	0.516301	0.472424	0.547647	-0.162435	6.13122	0.404043	0.525008	0.769275
sll0702	-1.06858	2.13715	3.72914	0.0534711	0.102856	-0.558693	2.13715	1.11581	0.290822	0.386533	-1.01743	2.13715	3.05392	0.0805427	0.122723	0.0511431	2.13715	0.00678826	0.934336	0.978076
sll0703	-0.795369	2.7811	2.78179	0.0953417	0.163623	-1.71454	2.7811	11.3744	0.000744648	0.00215412	-1.4404	2.7811	7.49649	0.00618193	0.0126802	-0.645031	2.7811	1.39423	0.237692	0.503777
sll0704	1.75272	7.53672	26.7712	2.29024e-07	2.2672e-06	2.20733	7.53672	41.449	1.20988e-10	1.42854e-09	2.27008	7.53672	43.5043	4.23022e-11	3.60513e-10	0.517362	7.53672	2.51027	0.113107	0.330518
sll0708	-1.67645	2.06704	10.1663	0.0014303	0.00488348	-1.28343	2.06704	6.4342	0.0111944	0.0235298	-2.83982	2.06704	18.5766	1.63214e-05	5.77295e-05	-1.16337	2.06704	2.32678	0.127165	0.354424
sll0709	1.65958	8.55235	15.5942	7.84937e-05	0.000388879	0.96045	8.55235	5.38804	0.0202753	0.0398268	0.834511	8.55235	4.07401	0.0435478	0.0714501	-0.825066	8.55235	4.00242	0.0454349	0.19618
sll0710	1.40864	7.10077	14.661	0.000128681	0.000600328	0.554147	7.10077	2.31761	0.127917	0.193634	0.204137	7.10077	0.311361	0.576846	0.648103	-1.20451	7.10077	10.7164	0.00106192	0.0119724
sll0711	0.67157	4.84142	4.19697	0.0404963	0.0816717	0.867027	4.84142	7.05604	0.00789984	0.0172849	0.708281	4.84142	4.51811	0.0335379	0.0569846	0.0367108	4.84142	0.0127346	0.910151	0.967352
sll0712	-0.539787	4.01723	1.89035	0.169162	0.259334	-0.748902	4.01723	3.56664	0.0589516	0.100323	-1.01886	4.01723	6.05557	0.0138625	0.0260785	-0.479073	4.01723	1.29965	0.254277	0.523478
sll0716	0.263884	4.69624	0.489468	0.484164	0.598432	0.273517	4.69624	0.526552	0.46806	0.567298	0.418497	4.69624	1.19875	0.273572	0.347667	0.154614	4.69624	0.165528	0.684117	0.867029
sll0721	0.0388886	6.36258	0.0157911	0.899999	0.934391	-0.303497	6.36258	0.951132	0.329431	0.426161	-0.0824081	6.36258	0.0694302	0.792168	0.83512	-0.121297	6.36258	0.150232	0.698314	0.875454
sll0722	-0.821084	2.92855	4.6654	0.0307762	0.0654422	-1.21761	2.92855	9.54404	0.002006	0.00524857	-2.00813	2.92855	19.0895	1.24731e-05	4.50503e-05	-1.18705	2.92855	5.91678	0.0149974	0.0893512
sll0723	-1.61898	5.84531	30.6394	3.10717e-08	3.82159e-07	-2.09425	5.84531	48.7021	2.97944e-12	4.69623e-11	-2.51226	5.84531	64.0549	1.21002e-15	1.95469e-14	-0.893281	5.84531	8.12336	0.00436986	0.0346072
sll0726	-0.563655	7.0001	3.6096	0.057447	0.108828	-0.613242	7.0001	4.26211	0.0389715	0.0700667	-0.377775	7.0001	1.61019	0.204465	0.272424	0.18588	7.0001	0.386888	0.53394	0.773401
sll0727	-1.35005	3.52293	15.9441	6.52394e-05	0.000332324	-1.09185	3.52293	10.9231	0.000949724	0.0026607	-1.56442	3.52293	18.0199	2.18612e-05	7.56753e-05	-0.21437	3.52293	0.28253	0.595048	0.811703
sll0728	-0.188583	6.43901	0.435628	0.50924	0.620517	-0.400377	6.43901	1.94415	0.163218	0.238725	-0.875142	6.43901	8.85228	0.00292723	0.00651007	-0.686559	6.43901	5.44146	0.0196643	0.108319
sll0729	-1.01974	2.99427	4.79933	0.0284708	0.0611812	-1.57082	2.99427	10.4975	0.00119536	0.00329322	-0.991517	2.99427	4.18068	0.0408873	0.0678043	0.0282198	2.99427	0.0030671	0.955835	0.986308
sll0733	1.26183	4.33377	8.82459	0.00297199	0.00917304	1.87407	4.33377	19.8348	8.44303e-06	3.93887e-05	2.16052	4.33377	25.8359	3.71703e-07	1.79869e-06	0.898686	4.33377	5.13266	0.0234797	0.122373
sll0735	-1.42362	5.36914	13.1137	0.00029315	0.0012164	-1.37188	5.36914	12.2368	0.000468566	0.0014259	-1.38146	5.36914	12.0862	0.000507956	0.00133983	0.0421629	5.36914	0.0111169	0.916029	0.969394
sll0736	-1.64114	3.52978	21.0524	4.46897e-06	3.14085e-05	-2.02384	3.52978	29.8703	4.6193e-08	3.45596e-07	-2.18217	3.52978	29.7648	4.87763e-08	2.67528e-07	-0.541029	3.52978	1.52793	0.216423	0.477394
sll0737	-0.917987	4.63678	11.0527	0.000885569	0.00321998	-0.675558	4.63678	6.12879	0.0132998	0.0274709	-0.8557	4.63678	8.96003	0.00275951	0.00617939	0.0622872	4.63678	0.043602	0.834596	0.943851
sll0739	-0.512962	2.32695	1.33615	0.247714	0.355897	0.0468178	2.32695	0.0124451	0.911174	0.936853	-0.942097	2.32695	3.43811	0.0637085	0.0997885	-0.429135	2.32695	0.638281	0.424334	0.697272
sll0740	1.68802	6.11804	30.3506	3.60601e-08	4.40177e-07	1.8407	6.11804	35.9339	2.04131e-09	1.94373e-08	2.58566	6.11804	68.942	1.01404e-16	1.91429e-15	0.897645	6.11804	9.64902	0.00189453	0.0183628
sll0741	2.65008	9.03019	53.1163	3.1438e-13	1.14696e-11	2.32984	9.03019	42.0378	8.95251e-11	1.08466e-09	1.64802	9.03019	21.899	2.87384e-06	1.16496e-05	-1.00206	9.03019	8.44391	0.00366269	0.0308102
sll0742	2.42591	6.22161	43.1755	5.0044e-11	1.15243e-09	1.79724	6.22161	24.3006	8.24149e-07	4.88323e-06	1.5266	6.22161	17.4141	3.0059e-05	0.000101774	-0.899314	6.22161	6.56924	0.0103756	0.0675142
sll0743	2.20443	5.51774	27.502	1.56935e-07	1.62801e-06	1.48124	5.51774	12.6908	0.000367455	0.00115488	0.855983	5.51774	4.15443	0.0415257	0.0686528	-1.34845	5.51774	10.807	0.00101115	0.0116015
sll0744	3.23466	6.44621	63.3439	1.73589e-15	1.21075e-13	2.67516	6.44621	44.8308	2.14818e-11	2.98084e-10	1.93595	6.44621	23.9427	9.92459e-07	4.38437e-06	-1.29871	6.44621	11.9922	0.000534232	0.00705143
sll0745	3.14862	6.1519	66.5751	3.36814e-16	2.73409e-14	2.82552	6.1519	54.4975	1.55648e-13	3.23967e-12	2.27309	6.1519	35.5657	2.46594e-09	1.6374e-08	-0.875533	6.1519	6.23382	0.0125333	0.0776634
sll0749	2.23858	6.68015	42.0691	8.81046e-11	1.93294e-09	2.8077	6.68015	64.6128	9.116e-16	2.60199e-14	3.34865	6.68015	88.6065	4.81694e-21	1.59598e-19	1.11007	6.68015	11.9153	0.000556757	0.00731899
sll0750	0.989915	7.41271	10.8865	0.000968684	0.00348319	1.53376	7.41271	25.7166	3.95402e-07	2.46898e-06	2.18581	7.41271	50.436	1.23117e-12	1.24925e-11	1.19589	7.41271	16.1834	5.74958e-05	0.00127869
sll0751	-0.268378	4.83409	0.817387	0.365945	0.481063	-0.0293364	4.83409	0.00989862	0.920748	0.943176	-0.035005	4.83409	0.0134514	0.907668	0.927748	0.233373	4.83409	0.582532	0.445322	0.709847
sll0752	-1.20388	3.24191	8.93961	0.00279052	0.00869559	-1.35375	3.24191	11.0128	0.000904846	0.00255481	-1.30973	3.24191	9.45217	0.002109	0.00483269	-0.105849	3.24191	0.0538997	0.816411	0.933756
sll0753	-0.628818	3.7991	3.7262	0.0535652	0.102915	-0.412112	3.7991	1.64061	0.200242	0.283552	-0.786498	3.7991	5.14943	0.023254	0.04117	-0.15768	3.7991	0.191002	0.662084	0.858022
sll0754	0.0493035	5.99823	0.024045	0.87677	0.916277	0.0827205	5.99823	0.0674288	0.795118	0.84592	-0.059891	5.99823	0.0345115	0.852623	0.883929	-0.109195	5.99823	0.114632	0.734931	0.895094
sll0755	0.45586	5.10851	2.76371	0.0964244	0.165394	0.120821	5.10851	0.189726	0.663145	0.740197	0.437347	5.10851	2.41771	0.11997	0.174292	-0.0185132	5.10851	0.00446819	0.946705	0.985241
sll0756	0.270194	4.58952	0.715781	0.397531	0.512013	0.340406	4.58952	1.1423	0.285166	0.380417	0.0611096	4.58952	0.0339219	0.853873	0.884272	-0.209085	4.58952	0.403575	0.525249	0.769275
sll0757	0.798373	9.50205	10.4341	0.00123713	0.00431003	0.930085	9.50205	14.105	0.000172886	0.000594034	1.21777	9.50205	23.8843	1.02305e-06	4.50551e-06	0.419394	9.50205	2.91317	0.0878588	0.285102
sll0759	1.63957	6.65299	39.9573	2.5957e-10	5.04685e-09	1.83013	6.65299	49.5799	1.90457e-12	3.15199e-11	1.85399	6.65299	50.1144	1.45035e-12	1.45349e-11	0.214418	6.65299	0.7483	0.387015	0.664099
sll0760	0.633226	7.50364	6.48369	0.0108869	0.0276818	0.764029	7.50364	9.42383	0.00214184	0.00553707	0.935339	7.50364	13.9572	0.000187024	0.000539313	0.302113	7.50364	1.49081	0.22209	0.483654
sll0761	1.32322	6.88078	20.3456	6.46408e-06	4.42803e-05	1.349	6.88078	21.1431	4.26228e-06	2.12264e-05	1.51993	6.88078	26.4398	2.71877e-07	1.34162e-06	0.196715	6.88078	0.472916	0.491649	0.739858
sll0762	1.90102	7.33966	34.5681	4.11593e-09	6.07473e-08	1.96887	7.33966	36.9112	1.23636e-09	1.20918e-08	2.46229	7.33966	55.9832	7.30927e-14	8.75764e-13	0.561266	7.33966	3.28681	0.0698388	0.249468
sll0763	0.854263	3.38079	4.02029	0.0449559	0.0889531	1.23494	3.38079	8.769	0.00306393	0.00760015	1.1823	3.38079	7.45328	0.00633211	0.0129555	0.328037	3.38079	0.638263	0.42434	0.697272
sll0764	0.546174	4.42795	3.29027	0.0696916	0.127847	0.481864	4.42795	2.53779	0.11115	0.172491	0.751193	4.42795	5.97568	0.0145045	0.0271761	0.205019	4.42795	0.468468	0.493693	0.741563
sll0765	0.808737	5.7005	9.05709	0.00261678	0.00824922	0.973996	5.7005	13.177	0.0002834	0.000917448	1.30871	5.7005	23.3458	1.35338e-06	5.79739e-06	0.499972	5.7005	3.62062	0.0570675	0.224604
sll0766	1.66511	6.36785	34.4737	4.32042e-09	6.3477e-08	1.90009	6.36785	44.6248	2.38654e-11	3.2423e-10	2.01966	6.36785	49.6486	1.83902e-12	1.82608e-11	0.354548	6.36785	1.72863	0.188585	0.439266
sll0767	-2.34101	7.4951	58.6148	1.9177e-14	1.0378e-12	-2.83678	7.4951	82.2751	1.18405e-19	6.51627e-18	-3.35864	7.4951	107.335	3.75932e-25	2.10457e-23	-1.01763	7.4951	10.9757	0.000923151	0.0107823
sll0771	-2.43273	6.79656	33.9412	5.68045e-09	8.16124e-08	-2.65701	6.79656	39.6764	2.99729e-10	3.32157e-09	-3.42957	6.79656	60.3455	7.95853e-15	1.14342e-13	-0.996839	6.79656	5.74223	0.0165617	0.0953473
sll0772	-0.921396	5.42955	10.8022	0.00101379	0.00362529	-1.29941	5.42955	20.7263	5.29823e-06	2.58697e-05	-1.28885	5.42955	19.5331	9.88708e-06	3.65642e-05	-0.367455	5.42955	1.54303	0.214167	0.474677
sll0775	1.56622	5.55254	21.3428	3.84068e-06	2.759e-05	2.0332	5.55254	36.0193	1.95378e-09	1.87136e-08	2.85627	5.55254	69.2596	8.63205e-17	1.65848e-15	1.29005	5.55254	16.6598	4.47182e-05	0.00108358
sll0776	1.03054	6.09772	6.08703	0.0136178	0.0336779	1.18051	6.09772	7.94517	0.00482159	0.0112308	1.59442	6.09772	14.2152	0.000163049	0.000476525	0.563881	6.09772	1.87953	0.170388	0.416917
sll0777	0.879739	5.0072	8.3391	0.00388009	0.0114533	0.69454	5.0072	5.13449	0.0234549	0.0451978	0.882383	5.0072	8.04845	0.00455426	0.00963995	0.0026433	5.0072	7.63373e-05	0.993029	0.997638
sll0778	0.0203699	4.07655	0.00598	0.938361	0.959942	-0.391635	4.07655	2.0737	0.149858	0.221479	-0.718756	4.07655	5.85994	0.0154893	0.0287557	-0.739125	4.07655	6.1698	0.0129949	0.0802179
sll0779	0.179956	5.22079	0.419522	0.517176	0.625856	0.264001	5.22079	0.907428	0.340798	0.438246	0.629051	5.22079	5.05259	0.0245892	0.0432978	0.449095	5.22079	2.60356	0.106624	0.319675
sll0781	1.21464	6.58261	5.6556	0.0173997	0.0411785	1.30479	6.58261	6.50514	0.0107563	0.0227529	1.09313	6.58261	4.58285	0.0322934	0.0552473	-0.121509	6.58261	0.058406	0.809033	0.929765
sll0782	1.32097	4.21191	15.3734	8.82201e-05	0.00043336	1.38623	4.21191	16.9676	3.80238e-05	0.00015337	1.39442	4.21191	16.2867	5.44458e-05	0.000177318	0.0734511	4.21191	0.052695	0.818438	0.933756
sll0783	-0.433969	3.32701	0.555154	0.45622	0.569967	0.173961	3.32701	0.0923491	0.761212	0.818982	0.629884	3.32701	1.20889	0.271552	0.345505	1.06385	3.32701	3.30625	0.0690166	0.248235
sll0789	2.44432	4.9403	24.8744	6.11886e-07	5.51887e-06	3.44576	4.9403	48.0837	4.08407e-12	6.28483e-11	3.19744	4.9403	41.4038	1.23816e-10	1.00007e-09	0.753118	4.9403	2.95021	0.0858663	0.28134
sll0790	2.19396	2.63927	8.735	0.00312159	0.00951718	3.12979	2.63927	18.247	1.9403e-05	8.35566e-05	2.42362	2.63927	10.3038	0.00132753	0.00317649	0.229652	2.63927	0.122704	0.726121	0.888697
sll0792	-2.93181	2.17539	26.5864	2.52017e-07	2.4722e-06	-1.67947	2.17539	11.3247	0.000764827	0.0022055	-2.74224	2.17539	20.5186	5.90534e-06	2.25584e-05	0.189562	2.17539	0.0577335	0.810115	0.930142
sll0794	0.724129	6.04337	4.59968	0.031978	0.0676434	0.70015	6.04337	4.29386	0.0382502	0.0690375	0.395225	6.04337	1.33697	0.24757	0.319499	-0.328904	6.04337	0.942933	0.331525	0.607949
sll0800	0.732761	3.51587	4.2249	0.039835	0.0804379	0.594127	3.51587	2.73172	0.098373	0.155057	0.510586	3.51587	1.83898	0.175071	0.238346	-0.222175	3.51587	0.380951	0.537095	0.775851
sll0802	-0.40515	3.17371	1.26972	0.259819	0.370528	-0.326012	3.17371	0.828326	0.362757	0.460826	-0.673121	3.17371	2.95861	0.0854214	0.129373	-0.267971	3.17371	0.437947	0.508115	0.75508
sll0803	0.840662	5.11783	7.93151	0.00485813	0.0138615	1.00268	5.11783	11.3323	0.000761693	0.00219842	1.70483	5.11783	32.6156	1.12311e-08	6.7159e-08	0.864171	5.11783	9.07744	0.00258781	0.0232117
sll0804	0.634611	4.49976	4.41317	0.0356624	0.0733814	0.897779	4.49976	9.03629	0.00264673	0.0066723	0.848661	4.49976	7.54722	0.00601026	0.0123437	0.214051	4.49976	0.511678	0.474413	0.72902
sll0807	-1.0765	7.38804	19.4532	1.03093e-05	6.55071e-05	-1.41838	7.38804	33.0174	9.13401e-09	7.76391e-08	-2.02324	7.38804	62.7033	2.40318e-15	3.69816e-14	-0.946743	7.38804	14.1345	0.000170198	0.0029202
sll0808	-0.413106	3.90078	0.661807	0.415923	0.529816	-0.862828	3.90078	2.77915	0.0954989	0.151335	-0.815822	3.90078	2.40729	0.120771	0.175299	-0.402716	3.90078	0.578484	0.446907	0.71063
sll0809	0.298456	2.35614	0.27915	0.597259	0.696588	1.06686	2.35614	4.01486	0.045101	0.0792746	1.12427	2.35614	4.13966	0.0418896	0.0691387	0.825814	2.35614	2.32536	0.127281	0.354444
sll0810	-0.24054	5.70725	0.371218	0.542341	0.647896	-0.506305	5.70725	1.62196	0.202818	0.286826	-0.677778	5.70725	2.83228	0.0923872	0.138624	-0.437238	5.70725	1.17705	0.277957	0.55017
sll0812	-0.789803	2.09704	1.25902	0.261837	0.373052	-0.533405	2.09704	0.595964	0.440122	0.540817	-0.257886	2.09704	0.134556	0.713754	0.768167	0.531916	2.09704	0.530325	0.46647	0.725397
sll0813	-0.639454	6.12194	5.73959	0.0165867	0.039659	-0.490207	6.12194	3.39451	0.0654136	0.10971	-0.645035	6.12194	5.65521	0.0174036	0.0318723	-0.00558153	6.12194	0.000416064	0.983726	0.993518
sll0814	0.677295	7.34613	5.73721	0.0166092	0.0396835	0.857424	7.34613	9.16257	0.00247016	0.00629598	1.23449	7.34613	18.7014	1.52871e-05	5.44268e-05	0.557197	7.34613	3.93073	0.0474115	0.201796
sll0815	-0.222804	5.1895	0.519145	0.471206	0.585089	-0.336066	5.1895	1.16614	0.280195	0.376259	-0.288867	5.1895	0.833121	0.361371	0.440455	-0.0660632	5.1895	0.0430452	0.83564	0.943851
sll0816	0.668032	4.2029	5.0423	0.0247356	0.0549351	0.796655	4.2029	7.26312	0.00703849	0.0156856	0.374567	4.2029	1.40615	0.235697	0.306823	-0.293465	4.2029	0.93102	0.334598	0.610379
sll0817	-1.04957	2.11003	3.33701	0.0677376	0.124685	-0.253981	2.11003	0.221871	0.637618	0.716879	-1.24756	2.11003	3.93475	0.0472982	0.076712	-0.197994	2.11003	0.0853508	0.770173	0.910369
sll0818	0.317758	5.16537	0.761606	0.382827	0.498211	0.221512	5.16537	0.368421	0.543866	0.637521	0.124439	5.16537	0.112443	0.73738	0.789408	-0.193319	5.16537	0.274075	0.600611	0.815608
sll0819	-1.34262	12.2672	8.01418	0.00464124	0.0133482	-2.29523	12.2672	22.0512	2.65476e-06	1.38808e-05	-3.54193	12.2672	47.2381	6.28653e-12	5.93106e-11	-2.19931	12.2672	20.369	6.3855e-06	0.000225367
sll0821	1.52898	8.42495	32.2351	1.36601e-08	1.8178e-07	1.59771	8.42495	35.075	3.17241e-09	2.91807e-08	1.77746	8.42495	42.869	5.8531e-11	4.8982e-10	0.248478	8.42495	0.897453	0.343465	0.6182
sll0822	-2.30773	6.74324	55.9743	7.34255e-14	3.13701e-12	-2.24672	6.74324	53.3385	2.80746e-13	5.52475e-12	-2.4288	6.74324	60.1283	8.88692e-15	1.26008e-13	-0.121072	6.74324	0.155027	0.693777	0.873137
sll0823	-0.510312	4.90515	3.25352	0.0712701	0.129716	-0.452046	4.90515	2.56212	0.109452	0.17045	-0.748124	4.90515	6.41572	0.0113114	0.0217456	-0.237812	4.90515	0.625794	0.428902	0.698134
sll0825	-2.25006	2.7636	30.1864	3.92447e-08	4.71954e-07	-2.61568	2.7636	37.5644	8.84424e-10	8.89079e-09	-2.17329	2.7636	24.4105	7.78438e-07	3.52032e-06	0.0767714	2.7636	0.0206479	0.885742	0.958661
sll0827	-0.911351	5.307	9.38586	0.00218666	0.00703675	-0.607006	5.307	4.25073	0.0392334	0.0704596	-0.374357	5.307	1.58758	0.207672	0.275984	0.536994	5.307	3.09824	0.078377	0.266455
sll0828	-0.0772807	5.28056	0.0716003	0.789021	0.851712	-0.423658	5.28056	2.10141	0.147163	0.217993	-0.473014	5.28056	2.4947	0.11423	0.167075	-0.395733	5.28056	1.73519	0.187749	0.438808
sll0829	0.197183	4.13195	0.489534	0.484135	0.598432	0.106072	4.13195	0.139663	0.708616	0.777586	-0.0690195	4.13195	0.0525416	0.818698	0.856342	-0.266203	4.13195	0.796272	0.37221	0.651519
sll0830	0.630371	7.81516	3.64106	0.0563711	0.107164	0.430164	7.81516	1.69978	0.192317	0.274003	0.201454	7.81516	0.371148	0.542379	0.614911	-0.428918	7.81516	1.68434	0.194348	0.445883
sll0833	-0.723566	3.62082	5.04741	0.0246628	0.0548143	-0.748312	3.62082	5.37531	0.0204237	0.0400457	-0.479962	3.62082	2.07244	0.149982	0.210091	0.243604	3.62082	0.479141	0.488812	0.737477
sll0834	-0.69231	5.5188	5.34382	0.0207958	0.0476528	-0.952716	5.5188	9.88918	0.00166254	0.00442117	-0.931572	5.5188	9.14121	0.00249915	0.00564701	-0.239262	5.5188	0.591613	0.441796	0.706826
sll0837	-0.0108858	6.02702	0.00130952	0.971133	0.979835	-0.102967	6.02702	0.116886	0.732437	0.795392	-0.29618	6.02702	0.934609	0.333668	0.411165	-0.285295	6.02702	0.865646	0.352164	0.628628
sll0838	0.0835412	5.1962	0.092783	0.760668	0.831893	-0.280205	5.1962	1.01372	0.314013	0.410713	0.282067	5.1962	1.02663	0.310952	0.38908	0.198526	5.1962	0.508832	0.475645	0.730436
sll0842	0.792615	4.38949	6.45248	0.0110797	0.0280624	0.86962	4.38949	7.79839	0.00522927	0.0120306	0.640838	4.38949	3.89208	0.0485144	0.0784103	-0.151777	4.38949	0.235049	0.627805	0.833972
sll0843	3.13862	9.07014	115.173	7.21371e-27	2.60255e-24	3.69788	9.07014	153.084	3.6729e-35	1.7037e-32	4.32743	9.07014	198.727	3.95853e-45	1.60667e-42	1.18881	9.07014	19.6346	9.3754e-06	0.000304419
sll0844	1.83308	7.75809	47.8289	4.65074e-12	1.32465e-10	2.48558	7.75809	85.2695	2.60343e-20	1.53697e-18	2.85949	7.75809	109.867	1.04793e-25	6.42004e-24	1.02642	7.75809	16.3702	5.20971e-05	0.00120828
sll0846	1.19425	9.06469	11.0319	0.000895561	0.00324904	1.88458	9.06469	26.5322	2.59181e-07	1.67976e-06	2.7176	9.06469	51.9856	5.59084e-13	5.99124e-12	1.52335	9.06469	17.8203	2.42781e-05	0.00066806
sll0847	-0.66732	6.21452	4.16846	0.0411833	0.0829027	-0.783345	6.21452	5.70389	0.0169273	0.0339907	-0.580338	6.21452	3.10674	0.0779687	0.11953	0.0869824	6.21452	0.069157	0.792568	0.924475
sll0848	-1.11817	2.10322	3.81008	0.0509449	0.0985219	-1.86125	2.10322	9.36565	0.0022109	0.00569745	-2.86755	2.10322	15.419	8.61169e-05	0.000267581	-1.74938	2.10322	5.0489	0.0246416	0.126505
sll0849	-1.14838	11.4096	7.38985	0.0065593	0.0178376	-1.7708	11.4096	16.9954	3.74709e-05	0.000151517	-2.34947	11.4096	28.72	8.36366e-08	4.42293e-07	-1.20109	11.4096	8.05204	0.00454523	0.0358213
sll0851	-0.0359972	13.0966	0.00971187	0.921497	0.947466	-0.483264	13.0966	1.74219	0.186861	0.26705	-1.00334	13.0966	7.39568	0.00653808	0.0133015	-0.967347	13.0966	6.88376	0.00869824	0.0599643
sll0853	-1.07759	2.98106	6.00252	0.0142854	0.0351334	-1.23987	2.98106	7.63937	0.0057108	0.0130309	-1.48776	2.98106	9.64279	0.00190096	0.00439944	-0.41017	2.98106	0.651904	0.419433	0.694138
sll0854	-1.02	3.36951	9.21689	0.00239793	0.0076409	-1.18009	3.36951	11.968	0.000541224	0.00162417	-1.08541	3.36951	9.12408	0.00252267	0.00569222	-0.065404	3.36951	0.02849	0.865962	0.951855
sll0855	-0.771774	3.80748	7.07719	0.00780715	0.0207797	-1.07826	3.80748	13.0593	0.000301788	0.000963527	-1.06548	3.80748	11.434	0.000721113	0.00183499	-0.293704	3.80748	0.778826	0.377501	0.656563
sll0856	1.05579	6.49603	10.7312	0.00105346	0.00374652	1.68373	6.49603	27.0043	2.02998e-07	1.36467e-06	2.3681	6.49603	51.613	6.75914e-13	7.12563e-12	1.31232	6.49603	17.297	3.1969e-05	0.000830426
sll0857	1.36073	5.01763	14.0077	0.000182059	0.00080868	2.16068	5.01763	36.3743	1.62834e-09	1.57827e-08	3.00484	5.01763	68.9481	1.01091e-16	1.91429e-15	1.64411	5.01763	24.3464	8.04786e-07	4.27777e-05
sll0858	1.24352	5.42101	12.6039	0.000384935	0.00153737	1.99895	5.42101	32.965	9.38347e-09	7.95512e-08	2.8889	5.42101	66.8812	2.88376e-16	4.98062e-15	1.64538	5.42101	24.9096	6.00814e-07	3.48365e-05
sll0860	-0.0970972	3.94084	0.0858292	0.769548	0.83932	-0.214589	3.94084	0.412867	0.520518	0.617197	-0.105652	3.94084	0.0942005	0.758904	0.806863	-0.00855465	3.94084	0.000601194	0.980438	0.992227
sll0861	-0.288352	2.68569	0.468644	0.493612	0.606331	-0.722549	2.68569	2.69793	0.100479	0.15784	-0.315313	2.68569	0.49586	0.481325	0.556179	-0.0269609	2.68569	0.00345927	0.953099	0.985335
sll0862	-0.262108	5.24984	0.800606	0.370912	0.486607	-0.527816	5.24984	3.17597	0.0747286	0.122982	-0.729845	5.24984	5.70643	0.0169029	0.031078	-0.467737	5.24984	2.31398	0.128216	0.35613
sll0863	-1.23119	2.0556	3.25963	0.071005	0.129452	-0.347462	2.0556	0.288963	0.590886	0.675804	-1.56273	2.0556	4.41416	0.0356417	0.0603068	-0.331543	2.0556	0.174685	0.675981	0.862764
sll0865	0.448431	4.87041	2.59315	0.107326	0.181033	0.166729	4.87041	0.347893	0.555308	0.646731	0.834379	4.87041	8.78877	0.0030309	0.00669809	0.385949	4.87041	1.94901	0.162694	0.405735
sll0867	-0.109688	4.14501	0.135756	0.712537	0.792696	-0.268825	4.14501	0.801986	0.3705	0.468281	-0.800647	4.14501	5.99647	0.0143345	0.0268887	-0.690959	4.14501	4.3955	0.0360339	0.170082
sll0868	-0.0136612	3.09755	0.00112036	0.973298	0.98146	0.0635381	3.09755	0.0243178	0.876079	0.91174	-0.196768	3.09755	0.202898	0.652392	0.715648	-0.183107	3.09755	0.173403	0.677105	0.862764
sll0869	0.316921	3.5885	0.675025	0.411305	0.525326	0.201884	3.5885	0.268128	0.60459	0.686881	0.185699	3.5885	0.211164	0.645857	0.709712	-0.131222	3.5885	0.108287	0.742103	0.898103
sll0871	2.0298	7.11482	29.1434	6.72148e-08	7.71189e-07	1.88031	7.11482	25.1777	5.22831e-07	3.20659e-06	2.11477	7.11482	31.3196	2.18855e-08	1.27581e-07	0.0849731	7.11482	0.0559338	0.813042	0.932942
sll0872	-1.48961	6.39623	16.0191	6.27077e-05	0.000321155	-1.75668	6.39623	21.7864	3.04747e-06	1.56568e-05	-1.81612	6.39623	22.8247	1.77467e-06	7.43528e-06	-0.326508	6.39623	0.759135	0.383599	0.661119
sll0873	-0.286249	4.66112	0.93372	0.333898	0.448373	-0.128301	4.66112	0.189913	0.662989	0.740197	0.0338036	4.66112	0.0126624	0.910405	0.929284	0.320052	4.66112	1.10075	0.294101	0.565726
sll0875	-1.70672	3.67751	18.3891	1.80085e-05	0.000104791	-2.16243	3.67751	27.58	1.50733e-07	1.03693e-06	-2.31828	3.67751	28.0814	1.16316e-07	6.03152e-07	-0.611567	3.67751	1.72873	0.188573	0.439266
sll0876	-0.201479	2.92505	0.195897	0.658053	0.749456	-0.0391282	2.92505	0.0075224	0.930885	0.95071	0.170078	2.92505	0.133925	0.714397	0.76835	0.371557	2.92505	0.618296	0.431681	0.700135
sll0877	0.985667	6.82926	9.36195	0.00221536	0.00712205	1.52675	6.82926	22.1649	2.50205e-06	1.32315e-05	1.91866	6.82926	34.2428	4.86468e-09	3.05524e-08	0.932991	6.82926	8.64692	0.00327615	0.0279203
sll0886	-0.891829	3.37182	4.99516	0.0254183	0.0561069	-0.856956	3.37182	4.61039	0.0317789	0.0585286	-0.303497	3.37182	0.576072	0.447856	0.523875	0.588332	3.37182	1.94202	0.16345	0.406995
sll0887	1.27146	6.35	19.9023	8.15024e-06	5.34623e-05	1.5152	6.35	28.1552	1.11966e-07	7.88618e-07	1.60766	6.35	31.17	2.36389e-08	1.36819e-07	0.336196	6.35	1.47653	0.224318	0.487199
sll0888	0.171637	4.21964	0.211318	0.645736	0.738797	0.152922	4.21964	0.166355	0.683371	0.757565	0.619943	4.21964	2.69721	0.100524	0.149315	0.448306	4.21964	1.42494	0.232592	0.497949
sll0891	1.76208	9.22989	26.4502	2.70422e-07	2.61327e-06	2.28586	9.22989	43.0557	5.3203e-11	6.74805e-10	2.68564	9.22989	57.6457	3.13847e-14	4.06e-13	0.923562	9.22989	7.63625	0.00572066	0.0424086
sll0892	1.45632	5.53025	25.4532	4.53234e-07	4.18082e-06	1.76609	5.53025	37.5819	8.7652e-10	8.86623e-09	2.15333	5.53025	54.8443	1.30466e-13	1.52382e-12	0.697006	5.53025	6.63591	0.00999433	0.0662277
sll0895	-0.606732	3.59896	3.2127	0.073069	0.132397	-0.926956	3.59896	7.14028	0.00753713	0.0166483	-0.483934	3.59896	1.88164	0.170148	0.232718	0.122799	3.59896	0.111952	0.737932	0.89606
sll0897	0.442581	5.61266	1.95564	0.161981	0.249977	0.552658	5.61266	3.05311	0.0805829	0.131023	0.808299	5.61266	6.44374	0.0111344	0.0214815	0.365718	5.61266	1.34863	0.245518	0.511769
sll0898	1.99234	6.89033	23.0949	1.54198e-06	1.24858e-05	1.88423	6.89033	20.7655	5.19105e-06	2.53845e-05	2.08548	6.89033	25.0813	5.49642e-07	2.54955e-06	0.0931395	6.89033	0.0551809	0.814282	0.933756
sll0899	-1.35954	4.90269	16.7364	4.2949e-05	0.000227639	-1.34822	4.90269	16.2983	5.41127e-05	0.000210929	-1.58505	4.90269	20.9936	4.60827e-06	1.79198e-05	-0.225514	4.90269	0.405158	0.524437	0.769275
sll0900	-1.46022	4.74032	19.3308	1.09919e-05	6.8901e-05	-1.56189	4.74032	21.7602	3.08947e-06	1.58476e-05	-1.59448	4.74032	21.4065	3.71504e-06	1.47107e-05	-0.134264	4.74032	0.142385	0.705921	0.878883
sll0901	-0.566946	3.14903	1.68618	0.194105	0.290978	-0.427941	3.14903	0.979973	0.322206	0.419359	-0.58795	3.14903	1.65282	0.198575	0.265667	-0.0210044	3.14903	0.00198381	0.964474	0.987448
sll0902	0.171834	5.89855	0.381534	0.536783	0.642912	0.112248	5.89855	0.161993	0.687328	0.760122	0.254628	5.89855	0.815943	0.366369	0.445877	0.0827939	5.89855	0.0866537	0.768475	0.909968
sll0905	1.47136	4.39282	18.1225	2.0714e-05	0.00011779	2.09857	4.39282	38.5925	5.22197e-10	5.4873e-09	2.33122	4.39282	46.4466	9.41509e-12	8.75954e-11	0.859857	4.39282	7.75375	0.00536011	0.040475
sll0909	1.144	4.37956	9.08661	0.00257488	0.008125	0.857618	4.37956	5.02308	0.0250116	0.0478003	0.223121	4.37956	0.309023	0.578281	0.648954	-0.920881	4.37956	5.61066	0.0178515	0.100807
sll0910	0.453444	4.72466	1.05368	0.30466	0.419343	-0.0104846	4.72466	0.000556064	0.981187	0.987268	0.026416	4.72466	0.00341712	0.953385	0.961977	-0.427028	4.72466	0.903539	0.341835	0.616632
sll0911	0.0305156	3.86497	0.00571804	0.939723	0.960731	-0.289805	3.86497	0.497002	0.480821	0.57866	-0.30208	3.86497	0.509819	0.475217	0.5501	-0.332596	3.86497	0.617298	0.432053	0.700388
sll0912	-0.90926	4.37329	10.8779	0.00097321	0.00349559	-1.21611	4.37329	18.5715	1.6365e-05	7.20994e-05	-0.545621	4.37329	3.79361	0.0514486	0.0825772	0.363639	4.37329	1.52128	0.217426	0.477983
sll0913	0.360316	4.11537	0.927602	0.335487	0.450135	0.391352	4.11537	1.10065	0.294124	0.389963	0.803289	4.11537	4.55561	0.032811	0.0559546	0.442972	4.11537	1.4258	0.232451	0.497949
sll0914	-2.65388	1.98399	24.3969	7.83948e-07	6.91706e-06	-2.16529	1.98399	18.3074	1.87975e-05	8.13805e-05	-1.883	1.98399	12.6752	0.000370539	0.00100597	0.770884	1.98399	1.22572	0.268241	0.540646
sll0915	-0.614923	4.24191	5.00906	0.025215	0.05581	-1.11752	4.24191	15.3557	8.90509e-05	0.000328951	-0.856311	4.24191	8.53279	0.00348805	0.0075656	-0.241388	4.24191	0.632185	0.426555	0.697745
sll0920	-0.0244705	7.42994	0.00845807	0.926724	0.951335	0.355105	7.42994	1.78719	0.181269	0.26078	0.610368	7.42994	5.23395	0.0221502	0.0394308	0.634838	7.42994	5.6483	0.0174723	0.0993566
sll0921	-0.0047928	4.28238	0.000130603	0.990882	0.993329	0.502961	4.28238	1.49183	0.221933	0.30941	0.454896	4.28238	1.17308	0.278769	0.353304	0.459689	4.28238	1.19493	0.274338	0.547158
sll0923	0.618169	9.76022	3.67699	0.0551682	0.105371	0.790373	9.76022	5.98482	0.0144295	0.02956	0.812352	9.76022	6.31112	0.0119983	0.0229032	0.194183	9.76022	0.365479	0.545479	0.780953
sll0924	0.20641	4.25535	0.336783	0.561692	0.665625	-0.20624	4.25535	0.326515	0.567719	0.657177	-0.277916	4.25535	0.554806	0.456361	0.532066	-0.484326	4.25535	1.70344	0.191839	0.443255
sll0925	1.84682	4.83865	32.9097	9.6541e-09	1.34536e-07	1.93385	4.83865	36.0243	1.94876e-09	1.87136e-08	2.23927	4.83865	47.3771	5.85638e-12	5.54393e-11	0.392447	4.83865	1.79997	0.179717	0.429389
sll0926	0.212499	4.64327	0.433156	0.510444	0.620521	0.498764	4.64327	2.43532	0.11863	0.181951	0.389172	4.64327	1.39333	0.237844	0.309128	0.176673	4.64327	0.290852	0.589675	0.808524
sll0927	-1.02684	6.37566	12.6304	0.00037952	0.00151761	-1.16002	6.37566	15.9612	6.46532e-05	0.000247266	-1.59102	6.37566	28.2784	1.05064e-07	5.49343e-07	-0.564181	6.37566	3.57844	0.0585342	0.227275
sll0928	-0.727852	9.07997	7.82284	0.00515902	0.014579	-0.764736	9.07997	8.62089	0.0033233	0.00815628	-0.734646	9.07997	7.93251	0.00485543	0.0102241	-0.00679374	9.07997	0.00068289	0.979152	0.992227
sll0930	0.0168404	7.60452	0.00188972	0.965326	0.976149	-0.419114	7.60452	1.16331	0.28078	0.376382	-1.15533	7.60452	8.54686	0.00346119	0.00753249	-1.17218	7.60452	8.78718	0.00303354	0.0264073
sll0931	-1.18965	2.60726	5.03588	0.0248274	0.0550646	-1.00531	2.60726	3.71603	0.0538923	0.092832	-1.55934	2.60726	7.39644	0.00653529	0.0133015	-0.369693	2.60726	0.36681	0.544748	0.780953
sll0932	-1.23574	4.31087	17.1087	3.52997e-05	0.00019103	-1.76981	4.31087	32.3177	1.30915e-08	1.08439e-07	-2.49049	4.31087	51.3315	7.80145e-13	8.17139e-12	-1.25475	4.31087	11.8583	0.000574054	0.00742611
sll0933	-0.722623	6.5482	5.20779	0.0224859	0.0509148	-1.10457	6.5482	11.9317	0.000551853	0.00165301	-1.27643	6.5482	15.4948	8.27336e-05	0.000257829	-0.553802	6.5482	2.94082	0.0863667	0.282449
sll0934	0.847614	9.68547	9.5096	0.002044	0.00667693	0.810525	9.68547	8.70363	0.00317577	0.0078297	0.987445	9.68547	12.8269	0.000341673	0.000932278	0.139831	9.68547	0.262622	0.608324	0.82096
sll0936	-1.0608	3.55698	8.20896	0.00416839	0.0121062	-1.40823	3.55698	13.7076	0.000213585	0.000717179	-1.60551	3.55698	15.7373	7.27748e-05	0.000228973	-0.544719	3.55698	1.64071	0.200227	0.454642
sll0938	-0.276676	3.19444	0.473324	0.491462	0.605149	-0.203829	3.19444	0.259435	0.610509	0.69146	-0.489081	3.19444	1.30436	0.253419	0.324981	-0.212405	3.19444	0.235623	0.627386	0.83386
sll0939	2.99728	3.13043	16.5607	4.71186e-05	0.000247964	2.6777	3.13043	13.268	0.000269982	0.00087927	2.62956	3.13043	12.5219	0.000402207	0.00108289	-0.367726	3.13043	0.324508	0.568911	0.794639
sll0943	-0.311918	3.10596	0.476846	0.489854	0.603627	-0.237529	3.10596	0.27807	0.597969	0.681504	-0.827564	3.10596	2.85415	0.0911383	0.136953	-0.515646	3.10596	1.07517	0.299779	0.572242
sll0944	0.681038	5.11754	3.10294	0.0781512	0.139888	1.19618	5.11754	9.63175	0.00191242	0.00502804	1.25202	5.11754	10.3657	0.00128381	0.0030878	0.570985	5.11754	2.25567	0.133126	0.363978
sll0945	-0.76552	6.21459	7.37212	0.00662429	0.0179842	-0.678268	6.21459	5.80847	0.0159492	0.0323264	-0.779609	6.21459	7.4604	0.00630709	0.0129124	-0.0140884	6.21459	0.00239754	0.960947	0.987448
sll0947	1.14471	12.9556	5.3274	0.0209926	0.0480699	0.971921	12.9556	3.86729	0.049236	0.0857208	0.248197	12.9556	0.256556	0.612496	0.6804	-0.896516	12.9556	3.29929	0.06931	0.248236
sll0980	2.23199	7.11897	62.0834	3.2922e-15	2.09603e-13	2.94413	7.11897	104.863	1.30871e-24	1.69975e-22	3.23786	7.11897	124.086	8.06836e-29	7.27722e-27	1.00587	7.11897	14.6684	0.000128181	0.00244825
sll0981	1.1113	5.32033	8.62066	0.00332372	0.00996502	1.54669	5.32033	16.6606	4.46988e-05	0.000176996	1.80348	5.32033	22.2221	2.42867e-06	9.98213e-06	0.692188	5.32033	3.55338	0.0594242	0.229157
sll0982	1.22961	6.33778	13.3168	0.000263033	0.0011006	1.9593	6.33778	33.3981	7.50981e-09	6.4852e-08	2.84473	6.33778	67.2392	2.40479e-16	4.19805e-15	1.61512	6.33778	24.3178	8.16821e-07	4.27777e-05
sll0983	1.27928	5.14265	12.1695	0.000485769	0.00188897	2.12786	5.14265	34.2428	4.86476e-09	4.3635e-08	2.7898	5.14265	57.4625	3.44486e-14	4.42114e-13	1.51051	5.14265	19.5022	1.00482e-05	0.000323035
sll0985	-0.456595	4.08896	2.03165	0.154054	0.239336	-0.290586	4.08896	0.831923	0.361717	0.460406	-0.884799	4.08896	6.55558	0.0104556	0.0203168	-0.428204	4.08896	1.46732	0.225769	0.489366
sll0990	1.51528	5.95599	27.9603	1.23828e-07	1.30967e-06	1.97269	5.95599	47.2677	6.19254e-12	9.35218e-11	1.95191	5.95599	45.3862	1.61768e-11	1.45906e-10	0.436632	5.95599	2.57416	0.108622	0.322981
sll0992	1.33268	4.82333	12.471	0.000413318	0.00163664	1.40644	4.82333	13.9104	0.000191738	0.000650793	1.09835	4.82333	8.16439	0.00427209	0.00906041	-0.234334	4.82333	0.405472	0.524277	0.769275
sll0993	0.442322	5.24948	1.25498	0.262603	0.373814	-0.0343826	5.24948	0.00747716	0.931092	0.95071	-0.882449	5.24948	4.56026	0.032722	0.055832	-1.32477	5.24948	10.2479	0.00136838	0.0143326
sll0994	0.308251	3.99701	1.05811	0.303646	0.41848	0.288754	3.99701	0.925543	0.336024	0.433136	0.313729	3.99701	1.00421	0.316294	0.393677	0.00547774	3.99701	0.000315575	0.985827	0.994402
sll0995	0.484395	5.09581	2.06577	0.150639	0.235723	0.5315	5.09581	2.48815	0.114707	0.17682	0.90326	5.09581	7.0721	0.00782932	0.015625	0.418865	5.09581	1.56927	0.210313	0.469015
sll0996	-1.55818	3.2924	10.6906	0.00107683	0.00381712	-1.6956	3.2924	12.551	0.000396003	0.00123455	-1.43838	3.2924	8.53405	0.00348562	0.00756539	0.119799	3.2924	0.0527252	0.818387	0.933756
sll0997	0.133276	6.96997	0.22572	0.634716	0.72811	0.110608	6.96997	0.15533	0.693493	0.765128	0.180486	6.96997	0.409084	0.522435	0.596674	0.0472102	6.96997	0.0280285	0.867042	0.952012
sll0998	-0.71295	6.04957	4.49107	0.0340724	0.0712384	-0.85686	6.04957	6.43525	0.0111877	0.0235298	-1.16815	6.04957	11.5056	0.000693856	0.00177258	-0.455198	6.04957	1.74964	0.185923	0.436193
sll1001	-0.797854	3.37437	4.02248	0.0448976	0.0889471	-0.762082	3.37437	3.66206	0.0556646	0.0953789	-1.19387	3.37437	7.62265	0.00576396	0.0119283	-0.39602	3.37437	0.774286	0.378894	0.657642
sll1002	-0.251464	3.93583	0.431638	0.511186	0.620958	0.180252	3.93583	0.232106	0.629967	0.709997	0.536877	3.93583	2.01782	0.155463	0.21609	0.788341	3.93583	4.21131	0.0401552	0.181844
sll1003	1.12874	6.89367	15.0568	0.000104324	0.000499617	0.727925	6.89367	6.2833	0.0121881	0.0253846	0.819742	6.89367	7.87896	0.00500132	0.0105109	-0.308995	6.89367	1.15407	0.282698	0.555377
sll1004	-0.599296	4.48126	4.02143	0.0449255	0.0889471	-0.950363	4.48126	9.73304	0.00180985	0.00478938	-1.52514	4.48126	21.3257	3.87501e-06	1.52511e-05	-0.925842	4.48126	7.53876	0.00603855	0.0443601
sll1005	-0.155206	2.13545	0.0824206	0.774044	0.8412	-0.750126	2.13545	1.76655	0.18381	0.263269	-0.917546	2.13545	2.23345	0.135052	0.192669	-0.762341	2.13545	1.49896	0.220831	0.481558
sll1006	-1.34638	4.22678	15.9777	6.40913e-05	0.000327208	-1.83862	4.22678	27.8492	1.3115e-07	9.11875e-07	-2.01823	4.22678	30.1969	3.90326e-08	2.17391e-07	-0.671846	4.22678	3.08246	0.0791406	0.267396
sll1009	2.23128	11.5675	55.0897	1.15152e-13	4.55975e-12	1.92685	11.5675	41.9522	9.35341e-11	1.12902e-09	1.41957	11.5675	23.4412	1.28791e-06	5.56095e-06	-0.81171	11.5675	7.87863	0.00500223	0.0385035
sll1011	1.47044	5.00305	10.2868	0.00133983	0.00460364	1.95606	5.00305	18.0857	2.11178e-05	9.0342e-05	2.24761	5.00305	23.4422	1.28725e-06	5.56095e-06	0.777173	5.00305	3.15314	0.075781	0.261489
sll1017	-0.583211	4.92662	4.4617	0.0346629	0.0721941	-0.459442	4.92662	2.78201	0.0953285	0.151212	-0.744204	4.92662	6.71134	0.00958016	0.0187843	-0.160993	4.92662	0.300904	0.583316	0.802554
sll1018	-0.772776	4.1095	6.74558	0.00939803	0.0243539	-0.328885	4.1095	1.30361	0.253555	0.346067	-0.0548845	4.1095	0.0347542	0.852112	0.883681	0.717892	4.1095	5.33697	0.0208777	0.112795
sll1019	0.0575465	2.51962	0.0147995	0.903174	0.936037	0.145813	2.51962	0.0965252	0.75604	0.815027	0.142685	2.51962	0.0818139	0.774854	0.820865	0.0851388	2.51962	0.0290657	0.864627	0.951354
sll1020	2.2255	7.79266	50.6289	1.11592e-12	3.65999e-11	2.6029	7.79266	67.7284	1.87646e-16	6.04926e-15	3.18395	7.79266	97.1223	6.51738e-23	2.82159e-21	0.958459	7.79266	10.4573	0.00122163	0.0132664
sll1021	2.46592	9.2074	87.9185	6.82088e-21	1.30279e-18	2.90823	9.2074	118.445	1.38511e-27	2.8109e-25	3.07495	9.2074	130.515	3.16079e-30	3.80115e-28	0.609033	9.2074	6.04286	0.0139626	0.0844259
sll1022	-0.662543	6.81141	2.8436	0.0917386	0.158529	-0.20931	6.81141	0.287502	0.591826	0.676402	-0.416433	6.81141	1.12392	0.289075	0.365224	0.24611	6.81141	0.39045	0.532063	0.772424
sll1023	-1.05551	3.58078	6.92193	0.00851452	0.0224404	-0.314843	3.58078	0.676622	0.410752	0.511458	-0.63929	3.58078	2.49108	0.114493	0.167383	0.416221	3.58078	0.942063	0.331748	0.607949
sll1025	0.191287	4.92833	0.348161	0.555156	0.660774	0.129559	4.92833	0.159196	0.689897	0.762197	0.296659	4.92833	0.812169	0.36748	0.447061	0.105371	4.92833	0.103151	0.748081	0.899331
sll1027	-0.118547	7.14409	0.172437	0.677955	0.766744	-0.170296	7.14409	0.355486	0.551024	0.64382	-0.158639	7.14409	0.305107	0.580698	0.650855	-0.040092	7.14409	0.0194416	0.889108	0.958945
sll1028	-1.44891	6.94335	11.4646	0.000709332	0.00265346	-1.36723	6.94335	10.2633	0.00135703	0.00369653	-1.7842	6.94335	16.8881	3.96503e-05	0.000132181	-0.335293	6.94335	0.621557	0.430469	0.699549
sll1029	-1.06603	5.02398	11.0026	0.000909849	0.00329719	-0.751479	5.02398	5.61716	0.0177855	0.0355163	-0.964548	5.02398	8.69804	0.00318553	0.0069888	0.10148	5.02398	0.0916012	0.762151	0.904984
sll1030	-0.955554	4.29895	4.75438	0.0292238	0.0625921	-0.87289	4.29895	4.00218	0.0454414	0.0797989	-0.921865	4.29895	4.26726	0.0388535	0.0649961	0.0336892	4.29895	0.00550191	0.940871	0.981687
sll1031	-0.682532	7.99536	4.94379	0.0261845	0.0572147	-0.709045	7.99536	5.33057	0.0209545	0.0409875	-0.782861	7.99536	6.44052	0.0111546	0.0214932	-0.100329	7.99536	0.106393	0.744289	0.898223
sll1032	-0.721413	4.49985	4.59506	0.0320641	0.0677814	-1.05182	4.49985	9.49131	0.00206447	0.00535838	-1.35964	4.49985	14.2964	0.000156161	0.000461869	-0.638223	4.49985	3.04245	0.0811135	0.270406
sll1033	0.507549	6.87712	3.84588	0.0498682	0.0970175	0.431159	6.87712	2.76861	0.0961298	0.152038	0.13275	6.87712	0.25654	0.612507	0.6804	-0.374799	6.87712	2.06156	0.151055	0.389711
sll1035	-0.311066	5.53371	1.11905	0.290122	0.403437	-0.30258	5.53371	1.05662	0.303988	0.400426	0.0686866	5.53371	0.0541668	0.815965	0.854107	0.379753	5.53371	1.6234	0.202618	0.457844
sll1036	0.755104	4.59207	7.08106	0.00779031	0.0207797	0.862877	4.59207	9.31731	0.00226998	0.00584507	0.6315	4.59207	4.57167	0.032505	0.0555493	-0.123604	4.59207	0.188875	0.663855	0.858022
sll1037	-0.44512	3.88345	2.06226	0.150986	0.236038	-1.18759	3.88345	13.0415	0.000304667	0.000971761	-0.623866	3.88345	3.61735	0.0571799	0.0907889	-0.178746	3.88345	0.281889	0.595466	0.811703
sll1039	0.268852	4.70653	0.436597	0.508769	0.620517	0.490611	4.70653	1.46783	0.225689	0.313973	0.512886	4.70653	1.56292	0.211238	0.279613	0.244034	4.70653	0.357962	0.54964	0.780953
sll1040	-0.530855	3.97303	3.19666	0.0737886	0.133255	-0.23995	3.97303	0.676256	0.410879	0.511458	-0.743055	3.97303	5.41142	0.0200055	0.0360476	-0.2122	3.97303	0.410699	0.521615	0.766918
sll1041	-0.446657	4.70576	1.43114	0.231579	0.337191	-0.442267	4.70576	1.39799	0.23706	0.327268	-0.719344	4.70576	3.46621	0.0626348	0.0984868	-0.272686	4.70576	0.489745	0.484041	0.735461
sll1043	0.933993	9.65388	12.9851	0.000313988	0.00129216	0.894767	9.65388	11.9294	0.000552544	0.00165356	0.836682	9.65388	10.4267	0.00124206	0.00300071	-0.0973115	9.65388	0.143378	0.704945	0.878679
sll1049	1.05908	7.47288	18.0763	2.12223e-05	0.00012026	1.33311	7.47288	28.4661	9.53515e-08	6.80454e-07	1.8912	7.47288	55.8307	7.89867e-14	9.3945e-13	0.83212	7.47288	11.5751	0.000668426	0.00834761
sll1051	-0.877309	2.82162	3.42769	0.0641117	0.119432	0.0663893	2.82162	0.022424	0.880965	0.915651	-0.999087	2.82162	3.90984	0.0480041	0.0777015	-0.121778	2.82162	0.0513145	0.820792	0.934471
sll1052	-1.49054	2.07721	9.59024	0.00195614	0.00643524	-1.61963	2.07721	11.0591	0.000882509	0.00250481	-1.98979	2.07721	12.6961	0.000366428	0.000995642	-0.49925	2.07721	0.602384	0.43767	0.703397
sll1053	1.33833	7.02957	24.5509	7.23739e-07	6.43765e-06	1.65867	7.02957	37.4029	9.60815e-10	9.59928e-09	2.09576	7.02957	58.2953	2.25586e-14	3.00195e-13	0.757423	7.02957	8.36264	0.00383014	0.031568
sll1054	0.451615	3.60297	1.4011	0.236539	0.343042	0.240466	3.60297	0.388917	0.532869	0.627576	0.598368	3.60297	2.31719	0.127951	0.183586	0.146753	3.60297	0.14588	0.702504	0.876982
sll1056	-1.13374	5.45467	14.6337	0.000130558	0.00060647	-0.970483	5.45467	10.8494	0.000988255	0.0027572	-1.1038	5.45467	13.3901	0.000252959	0.000711133	0.0299435	5.45467	0.00949188	0.922388	0.972939
sll1057	-0.117127	5.73446	0.0864548	0.768734	0.8393	0.280125	5.73446	0.498512	0.480155	0.578134	0.104682	5.73446	0.0684012	0.793679	0.836201	0.221809	5.73446	0.305972	0.580163	0.801271
sll1058	1.29605	4.71238	19.2293	1.15921e-05	7.23836e-05	1.30363	4.71238	19.4389	1.0387e-05	4.75694e-05	0.623669	4.71238	3.95749	0.0466633	0.0758591	-0.672379	4.71238	5.16462	0.0230515	0.120529
sll1059	-0.00662847	2.79938	0.000215397	0.98829	0.992877	0.327911	2.79938	0.562782	0.453141	0.553842	-0.577937	2.79938	1.349	0.245453	0.317145	-0.571308	2.79938	1.31025	0.252349	0.521565
sll1060	2.27023	8.85091	58.1181	2.46849e-14	1.27225e-12	2.65414	8.85091	77.3574	1.42659e-18	6.71326e-17	3.03096	8.85091	97.9119	4.37427e-23	1.94565e-21	0.760739	8.85091	7.20335	0.00727675	0.0521581
sll1061	1.84528	5.38116	17.8451	2.39637e-05	0.000133924	1.63554	5.38116	14.0429	0.000178688	0.000611381	1.96367	5.38116	19.866	8.30638e-06	3.09654e-05	0.118394	5.38116	0.0807766	0.776248	0.91421
sll1062	1.39179	3.25082	7.82572	0.0051508	0.0145685	1.30625	3.25082	6.88969	0.00866943	0.018804	1.28132	3.25082	6.21825	0.012644	0.0240228	-0.11047	3.25082	0.0533721	0.817296	0.933756
sll1063	-0.377699	5.02519	1.48073	0.22366	0.327571	-0.201063	5.02519	0.425111	0.514398	0.611142	-0.359322	5.02519	1.28061	0.257785	0.329669	0.0183766	5.02519	0.00327238	0.954382	0.985335
sll1064	1.58305	5.50092	23.4399	1.2888e-06	1.05943e-05	1.80926	5.50092	30.5273	3.29209e-08	2.5451e-07	1.62289	5.50092	23.9845	9.71157e-07	4.30785e-06	0.0398366	5.50092	0.0162001	0.898719	0.962587
sll1069	-1.26848	6.03102	18.3444	1.84364e-05	0.00010709	-1.6473	6.03102	29.9458	4.44299e-08	3.35498e-07	-1.80841	6.03102	34.392	4.50566e-09	2.84304e-08	-0.539928	6.03102	3.07185	0.079659	0.267813
sll1070	-0.270934	10.3715	0.9393	0.332458	0.446994	-0.311679	10.3715	1.24222	0.265043	0.35918	-0.379423	10.3715	1.8365	0.175361	0.238641	-0.108489	10.3715	0.150454	0.698102	0.875454
sll1071	1.74238	6.10089	40.823	1.66656e-10	3.38208e-09	1.99075	6.10089	53.1867	3.03313e-13	5.86225e-12	2.15048	6.10089	60.868	6.1033e-15	8.92676e-14	0.408103	6.10089	2.54377	0.11073	0.325671
sll1072	1.60335	5.93254	27.4524	1.6101e-07	1.65968e-06	1.61152	5.93254	27.7086	1.41033e-07	9.76406e-07	1.69724	5.93254	30.1981	3.901e-08	2.17391e-07	0.0938823	5.93254	0.102663	0.748658	0.899331
sll1074	-1.32151	5.82757	22.5345	2.064e-06	1.59567e-05	-1.60604	5.82757	32.3545	1.28456e-08	1.06674e-07	-1.61335	5.82757	31.5118	1.98231e-08	1.15765e-07	-0.291843	5.82757	1.01102	0.314658	0.588533
sll1076	-0.138297	5.48859	0.243268	0.621856	0.717033	-0.377728	5.48859	1.77693	0.182527	0.261777	-0.142508	5.48859	0.248095	0.61842	0.684626	-0.00421095	5.48859	0.000215573	0.988286	0.995802
sll1077	-1.69099	4.54612	30.223	3.85124e-08	4.66526e-07	-2.61256	4.54612	62.8804	2.19649e-15	5.94334e-14	-3.91447	4.54612	101.209	8.27623e-24	3.89462e-22	-2.22348	4.54612	29.435	5.78253e-08	4.81433e-06
sll1078	-0.889649	2.58637	4.9833	0.0255932	0.0562634	-1.83446	2.58637	17.1468	3.4599e-05	0.000140781	-1.35999	2.58637	9.07089	0.0025971	0.00583584	-0.470343	2.58637	0.931502	0.334473	0.610379
sll1079	0.547519	3.91225	3.59817	0.0578431	0.109514	-0.451554	3.91225	2.08512	0.14874	0.220027	0.413143	3.91225	1.84412	0.174469	0.237826	-0.134376	3.91225	0.208076	0.64828	0.848434
sll1080	1.39357	5.59533	23.9827	9.72047e-07	8.17678e-06	1.5787	5.59533	30.7792	2.89127e-08	2.27312e-07	1.21863	5.59533	17.6943	2.59405e-05	8.88488e-05	-0.174945	5.59533	0.401836	0.526143	0.76949
sll1081	1.5116	3.41034	14.5167	0.000138922	0.000639827	2.02027	3.41034	27.5611	1.52211e-07	1.04268e-06	1.55098	3.41034	14.1153	0.000171943	0.000500267	0.0393826	3.41034	0.0116952	0.913881	0.968464
sll1082	0.962325	2.87637	4.1463	0.0417255	0.083683	1.6084	2.87637	12.4925	0.000408578	0.00126468	1.21269	2.87637	6.17099	0.0129862	0.0245724	0.250362	2.87637	0.305172	0.580658	0.801274
sll1084	-1.45439	5.01228	23.3656	1.3395e-06	1.09281e-05	-1.33801	5.01228	20.082	7.4192e-06	3.50657e-05	-1.90731	5.01228	35.7846	2.20385e-09	1.47544e-08	-0.452921	5.01228	1.90227	0.167824	0.413763
sll1085	-0.0861487	3.1074	0.0384184	0.844605	0.891371	-0.465929	3.1074	1.08171	0.298316	0.394074	-0.758713	3.1074	2.50591	0.11342	0.166189	-0.672564	3.1074	1.94367	0.163271	0.406862
sll1086	1.97087	9.82864	63.2583	1.81299e-15	1.22624e-13	2.19814	9.82864	77.5417	1.29952e-18	6.20522e-17	2.50343	9.82864	98.3247	3.55107e-23	1.62399e-21	0.532557	9.82864	4.97861	0.0256626	0.130606
sll1087	1.22235	8.61495	24.2778	8.33931e-07	7.29858e-06	1.54202	8.61495	38.1358	6.59897e-10	6.83968e-09	1.90941	8.61495	57.2215	3.89384e-14	4.91957e-13	0.687057	8.61495	7.91897	0.0048919	0.038
sll1089	-0.368984	5.94192	1.65428	0.198378	0.296017	-0.558845	5.94192	3.75735	0.0525758	0.0908535	-0.928864	5.94192	9.78624	0.00175822	0.00409538	-0.55988	5.94192	3.5351	0.0600826	0.229705
sll1091	-2.36048	8.70374	72.9719	1.3151e-17	1.33442e-15	-2.87292	8.70374	103.337	2.82726e-24	3.53081e-22	-3.44886	8.70374	139.526	3.38016e-32	4.77191e-30	-1.08839	8.70374	15.9378	6.54587e-05	0.00142647
sll1092	-1.32398	3.79132	14.9042	0.00011311	0.00053616	-1.65809	3.79132	21.9894	2.74167e-06	1.42664e-05	-1.58254	3.79132	18.6211	1.59446e-05	5.65198e-05	-0.258555	3.79132	0.438129	0.508027	0.75508
sll1094	2.46345	4.44864	45.9052	1.24113e-11	3.14841e-10	2.05153	4.44864	30.9861	2.59886e-08	2.05817e-07	2.75885	4.44864	56.3129	6.18076e-14	7.57318e-13	0.295398	4.44864	0.880927	0.347948	0.621787
sll1095	-0.595865	2.01875	0.727172	0.393801	0.508419	-0.395749	2.01875	0.327596	0.567078	0.65667	-0.383191	2.01875	0.287959	0.591531	0.66126	0.212675	2.01875	0.0841842	0.771705	0.911173
sll1096	-0.881697	6.85348	8.63187	0.00330333	0.00992222	-0.705217	6.85348	5.57012	0.0182695	0.0362599	-0.894146	6.85348	8.72713	0.0031351	0.00689535	-0.0124494	6.85348	0.00168856	0.967222	0.987448
sll1097	-0.580941	6.36018	4.29868	0.0381419	0.0774525	-1.00419	6.36018	12.5501	0.000396183	0.00123455	-1.60457	6.36018	29.6471	5.18288e-08	2.83313e-07	-1.02363	6.36018	12.1405	0.000493392	0.00656576
sll1098	0.459423	11.2412	2.33544	0.126459	0.205821	0.5794	11.2412	3.70559	0.0542305	0.0932662	0.870384	11.2412	8.29265	0.00398058	0.00853694	0.410961	11.2412	1.87067	0.171398	0.418758
sll1099	-0.35168	10.8146	1.75288	0.185516	0.279911	-0.923855	10.8146	11.915	0.00055683	0.00166485	-1.44093	10.8146	28.2595	1.06094e-07	5.53838e-07	-1.08925	10.8146	16.4072	5.10902e-05	0.0012021
sll1101	-1.24157	5.18819	9.92637	0.00162928	0.00546922	-1.5412	5.18819	14.93	0.000111575	0.000403885	-2.01361	5.18819	23.5554	1.21369e-06	5.27558e-06	-0.772036	5.18819	3.48903	0.061777	0.231918
sll1102	0.662246	6.41544	1.54944	0.213218	0.314834	0.843698	6.41544	2.50522	0.11347	0.175445	0.86653	6.41544	2.63286	0.104673	0.154698	0.204285	6.41544	0.148913	0.699577	0.876
sll1103	0.504612	7.0635	3.04486	0.0809929	0.14418	0.451698	7.0635	2.43733	0.118478	0.181804	0.93478	7.0635	10.3203	0.00131573	0.00315522	0.430168	7.0635	2.22761	0.135563	0.36673
sll1104	0.959528	4.59009	11.7022	0.000624265	0.00236798	0.481459	4.59009	2.81625	0.0933141	0.148525	0.847771	4.59009	8.54204	0.00347037	0.00753733	-0.111757	4.59009	0.163368	0.686074	0.867694
sll1106	-0.0583892	9.72845	0.0474535	0.827555	0.878128	-0.0486865	9.72845	0.0329875	0.855877	0.895596	-0.0212609	9.72845	0.00627919	0.936841	0.948064	0.0371283	9.72845	0.0191402	0.889965	0.958945
sll1107	-0.385204	4.63124	1.51305	0.218674	0.321428	-0.399784	4.63124	1.61675	0.203546	0.287729	-0.253712	4.63124	0.627463	0.428287	0.507351	0.131492	4.63124	0.16318	0.686246	0.867694
sll1108	-1.2658	4.61929	13.7746	0.000206103	0.000898279	-1.96889	4.61929	30.7516	2.93257e-08	2.28938e-07	-2.02631	4.61929	30.5126	3.31705e-08	1.87313e-07	-0.760507	4.61929	4.12981	0.0421342	0.18781
sll1109	-1.63279	5.29082	16.604	4.60527e-05	0.000242748	-1.63234	5.29082	16.5183	4.81818e-05	0.000189862	-1.889	5.29082	21.0238	4.53605e-06	1.76601e-05	-0.256206	5.29082	0.386735	0.534021	0.773401
sll1110	-0.584555	5.05009	3.4708	0.0624609	0.116826	0.0355113	5.05009	0.0134005	0.907842	0.934908	0.355774	5.05009	1.32137	0.250346	0.322018	0.940328	5.05009	8.77781	0.00304917	0.0264399
sll1112	1.62251	7.7564	32.0277	1.51992e-08	1.982e-07	1.65843	7.7564	33.4137	7.44984e-09	6.45057e-08	1.7676	7.7564	37.5677	8.82947e-10	6.31482e-09	0.145088	7.7564	0.272792	0.601465	0.815608
sll1118	-0.357723	3.91286	0.92273	0.336759	0.450568	-0.408717	3.91286	1.1922	0.274886	0.370817	-0.300112	3.91286	0.615578	0.432695	0.510709	0.0576114	3.91286	0.0219609	0.882191	0.957378
sll1119	2.47098	7.14334	38.068	6.83207e-10	1.19912e-08	3.39363	7.14334	67.8404	1.7728e-16	5.81443e-15	3.86727	7.14334	84.8736	3.18058e-20	9.83558e-19	1.39629	7.14334	13.8511	0.000197884	0.00329502
sll1120	-0.714664	5.28542	5.84928	0.0155834	0.0377044	-0.482286	5.28542	2.70891	0.0997894	0.156985	-0.770336	5.28542	6.46874	0.0109789	0.0212319	-0.0556724	5.28542	0.0327025	0.856495	0.94916
sll1121	0.35872	4.01352	0.95811	0.327664	0.442323	0.435792	4.01352	1.424	0.232746	0.32186	0.311715	4.01352	0.676403	0.410828	0.491691	-0.0470054	4.01352	0.0158258	0.89989	0.962587
sll1123	0.831391	5.88199	7.5324	0.00605993	0.016746	1.06107	5.88199	12.2868	0.000456183	0.00139213	1.04919	5.88199	11.7648	0.000603604	0.00156043	0.217797	5.88199	0.531628	0.465923	0.724893
sll1124	-0.0666343	6.52755	0.0457771	0.830582	0.880287	0.120037	6.52755	0.149022	0.699472	0.769338	0.275817	6.52755	0.777961	0.377765	0.457144	0.342452	6.52755	1.19606	0.27411	0.547158
sll1127	-0.83503	3.44468	5.82753	0.0157773	0.0380884	-0.992128	3.44468	7.992	0.00469845	0.0109913	-0.317405	3.44468	0.83178	0.361758	0.440761	0.517624	3.44468	1.95492	0.162058	0.405082
sll1129	0.952769	4.81983	12.9036	0.000327956	0.00133443	0.905521	4.81983	11.5975	0.000660411	0.00193359	0.741737	4.81983	7.20056	0.00728809	0.0146438	-0.211032	4.81983	0.640663	0.423471	0.697272
sll1130	-1.59095	6.79646	18.6853	1.54167e-05	9.1347e-05	-2.48747	6.79646	42.5748	6.80306e-11	8.48333e-10	-3.11986	6.79646	61.7255	3.94824e-15	5.9078e-14	-1.5289	6.79646	16.0786	6.07672e-05	0.00134225
sll1131	-1.53999	3.9863	18.4919	1.7063e-05	9.98262e-05	-2.46291	3.9863	41.2555	1.33578e-10	1.56017e-09	-2.52951	3.9863	39.267	3.6963e-10	2.81734e-09	-0.989525	3.9863	5.47195	0.0193241	0.107074
sll1132	-1.63733	4.00263	24.0334	9.46808e-07	8.02685e-06	-2.25471	4.00263	41.3647	1.2632e-10	1.48073e-09	-2.66622	4.00263	48.2358	3.77924e-12	3.65214e-11	-1.02889	4.00263	6.30479	0.0120412	0.0756243
sll1135	1.52674	5.04662	21.3228	3.88081e-06	2.78168e-05	1.44429	5.04662	19.0344	1.28385e-05	5.78177e-05	1.3273	5.04662	15.4762	8.355e-05	0.000259853	-0.199444	5.04662	0.390465	0.532055	0.772424
sll1138	2.24861	6.15412	60.6342	6.87312e-15	4.21076e-13	2.7492	6.15412	90.1206	2.24073e-21	1.65356e-19	2.97258	6.15412	103.458	2.66031e-24	1.34969e-22	0.723966	6.15412	7.72637	0.00544199	0.0409031
sll1142	-0.322011	4.4919	0.965311	0.325852	0.440787	-0.0834749	4.4919	0.0661319	0.797054	0.847147	-0.354937	4.4919	1.09903	0.294478	0.371184	-0.0329265	4.4919	0.00922148	0.923498	0.972939
sll1143	-0.376937	6.26063	2.32507	0.127305	0.206782	-0.405087	6.26063	2.67401	0.101999	0.159841	-0.309783	6.26063	1.52789	0.216429	0.285669	0.0671541	6.26063	0.0707424	0.790259	0.924271
sll1144	0.32485	3.77478	0.886648	0.346387	0.45982	0.543533	3.77478	2.54536	0.110619	0.171856	0.585941	3.77478	2.7711	0.0959803	0.14355	0.26109	3.77478	0.568153	0.450994	0.713336
sll1147	1.12685	5.32471	11.8657	0.00057178	0.0021842	1.28764	5.32471	15.4764	8.35418e-05	0.000310722	1.19063	5.32471	12.8479	0.000337853	0.000922631	0.0637809	5.32471	0.039675	0.842117	0.944067
sll1150	1.10512	10.6426	14.7377	0.000123549	0.000578047	1.31262	10.6426	20.6018	5.6542e-06	2.74427e-05	1.44744	10.6426	24.8683	6.13835e-07	2.82312e-06	0.34232	10.6426	1.44643	0.229101	0.49428
sll1151	-0.23595	5.45099	0.897695	0.3434	0.456789	-0.389436	5.45099	2.41008	0.120556	0.184644	-0.141283	5.45099	0.308824	0.578403	0.648954	0.094667	5.45099	0.136112	0.712177	0.882273
sll1154	1.45564	7.79392	29.6152	5.26913e-08	6.24411e-07	1.83197	7.79392	46.219	1.05748e-11	1.54668e-10	2.5061	7.79392	83.0749	7.9004e-20	2.29041e-18	1.05045	7.79392	16.2271	5.6184e-05	0.00125813
sll1155	0.864026	7.10986	6.29018	0.0121408	0.0304412	1.33425	7.10986	14.8253	0.000117944	0.000424574	1.59039	7.10986	20.7445	5.24828e-06	2.0263e-05	0.726368	7.10986	4.53136	0.0332792	0.161763
sll1156	1.71187	5.14934	14.68	0.000127391	0.000595162	2.04883	5.14934	20.8916	4.86019e-06	2.39469e-05	2.81691	5.14934	38.1608	6.51473e-10	4.75356e-09	1.10504	5.14934	6.87236	0.00875391	0.0602202
sll1157	0.635393	2.80203	1.97399	0.160025	0.247175	1.17655	2.80203	7.31675	0.00683147	0.0152781	0.827263	2.80203	3.11867	0.0774001	0.118827	0.19187	2.80203	0.184782	0.667295	0.858022
sll1159	0.887345	5.71034	4.73074	0.0296281	0.0632735	0.72671	5.71034	3.17199	0.0749113	0.12322	0.697538	5.71034	2.88218	0.0895645	0.134887	-0.189807	5.71034	0.218693	0.640037	0.843084
sll1160	0.925335	2.64161	2.73824	0.0979729	0.167519	0.418466	2.64161	0.538096	0.463223	0.563539	0.332623	2.64161	0.311631	0.576681	0.648103	-0.592712	2.64161	1.0717	0.300561	0.572724
sll1161	0.0551293	2.72763	0.013741	0.906684	0.937794	-0.520238	2.72763	1.12695	0.288426	0.383977	-0.943585	2.72763	3.0971	0.0784321	0.120127	-0.998714	2.72763	3.46491	0.0626838	0.234486
sll1164	-0.44647	3.49765	1.2462	0.264279	0.375542	-0.6793	3.49765	2.77975	0.0954632	0.151335	-1.30059	3.49765	8.48175	0.00358727	0.00776007	-0.854123	3.49765	3.5206	0.0606104	0.230031
sll1165	-0.548613	3.89641	2.97012	0.0848158	0.1496	-0.931372	3.89641	8.09436	0.00444033	0.0104867	-1.06069	3.89641	9.36096	0.00221656	0.0050613	-0.512073	3.89641	2.05878	0.151332	0.389711
sll1166	0.554526	5.29358	2.07391	0.149837	0.234902	0.0992993	5.29358	0.0657512	0.797627	0.847478	0.324528	5.29358	0.691129	0.405781	0.486727	-0.229998	5.29358	0.352084	0.552936	0.784695
sll1167	0.109967	3.10781	0.0682923	0.79384	0.855208	0.268285	3.10781	0.412259	0.520825	0.617197	-0.53283	3.10781	1.31747	0.251047	0.322449	-0.642797	3.10781	1.92451	0.165361	0.409867
sll1169	0.58626	2.04867	1.19028	0.275273	0.387018	0.589721	2.04867	1.18506	0.276327	0.372336	-0.163622	2.04867	0.0701829	0.791071	0.834505	-0.749882	2.04867	1.62072	0.202991	0.457844
sll1170	0.109803	5.8434	0.0852516	0.770303	0.83932	0.108702	5.8434	0.0833613	0.772793	0.828607	0.329378	5.8434	0.757151	0.384222	0.463435	0.219575	5.8434	0.337248	0.561422	0.790461
sll1172	-1.47163	5.07039	16.4216	5.0704e-05	0.000265114	-1.41654	5.07039	15.2866	9.23687e-05	0.000338894	-1.81548	5.07039	23.1624	1.48877e-06	6.32727e-06	-0.343851	5.07039	0.812206	0.367469	0.645656
sll1173	-0.663402	1.97073	1.27253	0.259293	0.370076	-0.62844	1.97073	1.13423	0.286874	0.382224	-1.4389	1.97073	4.53169	0.0332727	0.0566229	-0.775494	1.97073	1.20356	0.272611	0.546737
sll1174	-1.63556	2.80267	13.8801	0.000194852	0.00085846	-0.984098	2.80267	5.59159	0.0180469	0.0359499	-2.38709	2.80267	21.7432	3.11701e-06	1.25259e-05	-0.751536	2.80267	1.69929	0.192381	0.443336
sll1178	-1.44207	4.86784	24.1658	8.8389e-07	7.65331e-06	-1.73692	4.86784	33.7797	6.17202e-09	5.4458e-08	-2.17631	4.86784	46.0197	1.17067e-11	1.07988e-10	-0.734237	4.86784	4.89989	0.0268584	0.13584
sll1180	-0.502673	8.60735	3.72631	0.0535617	0.102915	-0.410704	8.60735	2.49189	0.114434	0.176684	-0.158939	8.60735	0.373133	0.541302	0.613904	0.343734	8.60735	1.73553	0.187706	0.438808
sll1181	0.163135	8.77555	0.397892	0.52818	0.635185	0.217078	8.77555	0.704254	0.401358	0.502007	0.428443	8.77555	2.72896	0.0985434	0.14691	0.265308	8.77555	1.04933	0.305661	0.578706
sll1182	0.244686	5.2579	0.874974	0.349582	0.463303	0.0353	5.2579	0.0179039	0.893556	0.925184	0.741587	5.2579	7.93263	0.00485512	0.0102241	0.496901	5.2579	3.61469	0.0572715	0.225043
sll1184	-2.06155	10.0023	41.2362	1.349e-10	2.75485e-09	-2.63772	10.0023	64.5562	9.38193e-16	2.64897e-14	-3.08492	10.0023	84.7455	3.39343e-20	1.03948e-18	-1.02337	10.0023	10.6374	0.00110823	0.0124084
sll1185	-2.62361	5.48288	41.9162	9.527e-11	2.06228e-09	-3.29408	5.48288	61.2136	5.12064e-15	1.31958e-13	-3.85357	5.48288	74.2623	6.83981e-18	1.62108e-16	-1.22996	5.48288	7.87979	0.00499903	0.0385035
sll1186	0.703822	6.2399	5.4125	0.019993	0.0461061	0.848356	6.2399	7.84927	0.00508414	0.0117663	0.996512	6.2399	10.6758	0.00108548	0.00265003	0.29269	6.2399	0.951038	0.329455	0.605399
sll1187	-0.870076	5.76945	9.33672	0.00224607	0.00720154	-1.11892	5.76945	15.1101	0.000101418	0.000370006	-0.77586	5.76945	7.21482	0.00723039	0.0145563	0.0942164	5.76945	0.103586	0.747568	0.899331
sll1188	0.125116	5.91128	0.127531	0.721006	0.799406	-0.0308611	5.91128	0.00770615	0.930048	0.950241	0.399214	5.91128	1.28365	0.257222	0.329078	0.274098	5.91128	0.606117	0.436254	0.703397
sll1189	1.29215	6.93282	25.6705	4.04972e-07	3.7808e-06	1.35712	6.93282	28.2582	1.06163e-07	7.51008e-07	1.28972	6.93282	25.1831	5.21369e-07	2.42534e-06	-0.00243175	6.93282	9.52723e-05	0.992212	0.997527
sll1191	-0.375811	5.76016	0.780835	0.376886	0.492256	0.135574	5.76016	0.102691	0.748624	0.809451	0.435064	5.76016	1.04804	0.305959	0.383437	0.810875	5.76016	3.57878	0.0585222	0.227275
sll1192	-0.118392	3.10527	0.0843548	0.77148	0.839476	-0.01448	3.10527	0.00127416	0.971525	0.979367	-0.556295	3.10527	1.5699	0.210222	0.278495	-0.437903	3.10527	0.951784	0.329266	0.605394
sll1193	1.28984	6.81422	22.3859	2.23007e-06	1.71183e-05	1.05793	6.81422	15.0964	0.000102158	0.000372285	1.08287	6.81422	15.591	7.8628e-05	0.000245959	-0.206972	6.81422	0.598583	0.439119	0.705128
sll1194	-0.209045	10.3967	0.411523	0.521198	0.629118	-0.675979	10.3967	4.26522	0.0389002	0.070016	-0.918496	10.3967	7.80416	0.00521261	0.0109055	-0.709451	10.3967	4.68509	0.0304255	0.151906
sll1196	0.390532	6.72714	2.12061	0.145329	0.229404	0.450759	6.72714	2.82159	0.0930044	0.148245	0.175924	6.72714	0.421273	0.516303	0.5902	-0.214609	6.72714	0.631474	0.426815	0.697819
sll1198	-1.79662	4.52015	16.7277	4.31459e-05	0.000228168	-2.24754	4.52015	25.0857	5.48391e-07	3.34076e-06	-3.33398	4.52015	44.9842	1.98627e-11	1.76214e-10	-1.53736	4.52015	9.52691	0.00202481	0.0194513
sll1200	-0.868159	4.64423	7.44859	0.00634861	0.0174104	-0.77664	4.64423	5.9784	0.0144821	0.0296304	-0.946421	4.64423	8.22505	0.00413161	0.00883169	-0.0782618	4.64423	0.0532574	0.817489	0.933756
sll1201	1.89738	7.65199	37.6082	8.64816e-10	1.48574e-08	1.85172	7.65199	35.8744	2.10452e-09	1.99807e-08	2.1324	7.65199	46.7112	8.22591e-12	7.69728e-11	0.235026	7.65199	0.62779	0.428167	0.698134
sll1202	-0.415703	3.03132	0.615475	0.432734	0.547152	-1.21038	3.03132	4.70119	0.0301417	0.055862	-0.649606	3.03132	1.36118	0.243333	0.315033	-0.233902	3.03132	0.171939	0.678395	0.863205
sll1203	0.252791	2.09959	0.144325	0.704019	0.786479	0.475989	2.09959	0.511026	0.474695	0.572774	-0.00845494	2.09959	0.000159772	0.989915	0.991442	-0.261246	2.09959	0.138955	0.709323	0.88109
sll1204	0.171414	2.06309	0.0968629	0.755627	0.827432	-0.23998	2.06309	0.17808	0.673029	0.748912	-0.780598	2.06309	1.4786	0.223994	0.2941	-0.952012	2.06309	2.2286	0.135477	0.36673
sll1205	-1.68044	2.28886	9.40147	0.00216811	0.00700484	-0.718549	2.28886	2.03606	0.153607	0.226094	-1.41065	2.28886	6.11283	0.0134204	0.0253496	0.269786	2.28886	0.173958	0.676618	0.862764
sll1206	-0.605344	3.59058	3.19354	0.0739299	0.133436	-0.686671	3.59058	4.06839	0.043693	0.0770202	-1.11426	3.59058	8.90313	0.00284683	0.0063443	-0.508919	3.59058	1.72476	0.189082	0.439792
sll1209	-0.543842	3.36718	2.07406	0.149822	0.234902	-0.597333	3.36718	2.4756	0.115626	0.177932	-0.610896	3.36718	2.37054	0.123644	0.178591	-0.0670535	3.36718	0.0265651	0.870528	0.952225
sll1212	-1.68265	4.10782	34.2357	4.88253e-09	7.04603e-08	-1.60445	4.10782	31.4986	1.99588e-08	1.60412e-07	-1.5076	4.10782	25.4944	4.43678e-07	2.09698e-06	0.175049	4.10782	0.279411	0.597088	0.812578
sll1213	-1.24254	4.80946	19.2028	1.17541e-05	7.3114e-05	-1.19985	4.80946	17.9738	2.2397e-05	9.5688e-05	-1.15636	4.80946	15.6894	7.46413e-05	0.000233713	0.0861827	4.80946	0.0797696	0.77761	0.914819
sll1214	-1.99844	7.63772	54.5972	1.47945e-13	5.71878e-12	-2.32293	7.63772	71.6855	2.52376e-17	1.0373e-15	-2.05346	7.63772	56.6303	5.25955e-14	6.49345e-13	-0.0550129	7.63772	0.0423629	0.83693	0.943851
sll1217	0.544076	3.78416	1.19633	0.274056	0.385722	0.547603	3.78416	1.21642	0.270064	0.365375	0.881805	3.78416	3.09294	0.0786324	0.120241	0.337729	3.78416	0.470717	0.492657	0.740807
sll1218	-0.814485	4.67244	7.03918	0.00797454	0.021172	-0.597125	4.67244	3.84799	0.0498056	0.0866197	-1.01333	4.67244	9.94041	0.0016169	0.00379614	-0.198849	4.67244	0.362099	0.547343	0.780953
sll1219	-2.45226	5.451	48.7978	2.83755e-12	8.53104e-11	-2.82841	5.451	61.976	3.47666e-15	9.25303e-14	-3.50704	5.451	83.5402	6.24338e-20	1.84293e-18	-1.05477	5.451	7.58971	0.00587024	0.0434184
sll1220	2.9727	7.80605	37.0004	1.18106e-09	1.97676e-08	2.53656	7.80605	27.8598	1.30433e-07	9.08834e-07	1.77095	7.80605	14.22	0.000162628	0.000476451	-1.20175	7.80605	6.86523	0.00878889	0.060333
sll1221	3.10033	7.83153	47.1127	6.70197e-12	1.81344e-10	2.48374	7.83153	31.6973	1.80169e-08	1.45164e-07	1.41702	7.83153	10.9086	0.000957193	0.00236891	-1.68331	7.83153	15.5056	8.22613e-05	0.00167857
sll1222	2.39466	6.28961	24.8665	6.14402e-07	5.52621e-06	1.4932	6.28961	10.133	0.00145639	0.0039179	0.988922	6.28961	4.46161	0.0346649	0.0587765	-1.40574	6.28961	9.1479	0.00249004	0.0227111
sll1223	2.51251	6.67611	27.1945	1.83983e-07	1.8727e-06	1.78813	6.67611	14.3921	0.000148425	0.000521575	0.854022	6.67611	3.35806	0.0668768	0.104198	-1.65849	6.67611	12.5651	0.000393018	0.00554238
sll1224	2.11986	5.88377	21.0595	4.45247e-06	3.13605e-05	1.46309	5.88377	10.3243	0.00131294	0.00358545	0.705378	5.88377	2.39075	0.122055	0.17661	-1.41448	5.88377	9.73997	0.00180304	0.017634
sll1225	2.5336	7.8306	28.2809	1.04924e-07	1.13185e-06	1.34003	7.8306	8.50397	0.00354372	0.00861263	0.781814	7.8306	2.93611	0.0866189	0.131058	-1.75178	7.8306	14.2703	0.000158346	0.00276425
sll1226	2.59576	6.67068	38.3733	5.84267e-10	1.05395e-08	1.70754	6.67068	17.4627	2.93004e-05	0.00012135	0.595985	6.67068	2.14825	0.142732	0.202116	-1.99977	6.67068	23.6763	1.13979e-06	5.87445e-05
sll1228	0.543887	5.99604	4.40773	0.0357764	0.0734762	0.543902	5.99604	4.40167	0.0359038	0.0652012	0.752703	5.99604	8.24543	0.00408548	0.0087446	0.208816	5.99604	0.653361	0.418914	0.693632
sll1229	0.94764	7.15858	7.82726	0.0051464	0.0145685	1.45598	7.15858	18.1997	1.98908e-05	8.55435e-05	1.84561	7.15858	28.614	8.83426e-08	4.64156e-07	0.897972	7.15858	7.17505	0.00739244	0.0525235
sll1231	-1.37582	3.29279	5.90159	0.0151272	0.0369032	-1.24862	3.29279	4.85942	0.0274956	0.0516358	-1.15488	3.29279	3.9981	0.0455515	0.0742871	0.220941	3.29279	0.136456	0.71183	0.882273
sll1232	-0.854677	3.10006	5.79306	0.0160895	0.0386983	-1.44533	3.10006	14.6662	0.000128324	0.000457376	-1.11708	3.10006	8.19833	0.0041929	0.00893331	-0.262398	3.10006	0.397627	0.528317	0.770327
sll1233	-0.982366	4.5519	6.20483	0.0127402	0.0317966	-1.29286	4.5519	10.3783	0.00127504	0.00349667	-1.9348	4.5519	20.654	5.50234e-06	2.11684e-05	-0.952437	4.5519	4.92401	0.026486	0.134166
sll1234	-0.544359	9.06174	3.8658	0.0492796	0.0962181	-0.695411	9.06174	6.27948	0.0122144	0.0254068	-0.668546	9.06174	5.78724	0.0161429	0.0298157	-0.124187	9.06174	0.200856	0.654031	0.852923
sll1236	0.373053	2.90351	0.612524	0.433839	0.548073	0.702022	2.90351	2.25535	0.133153	0.200347	0.295874	2.90351	0.35155	0.553237	0.625474	-0.077179	2.90351	0.0248795	0.874668	0.954506
sll1237	-0.15784	5.22895	0.276913	0.598731	0.697804	-0.305294	5.22895	1.02285	0.311844	0.409279	-0.859857	5.22895	7.38874	0.00656336	0.0133445	-0.702017	5.22895	4.88567	0.0270805	0.13675
sll1239	0.029663	7.46964	0.0060185	0.938163	0.959942	-0.0382496	7.46964	0.00999189	0.920377	0.943176	0.187648	7.46964	0.239727	0.624403	0.690544	0.157985	7.46964	0.169905	0.680196	0.864422
sll1240	-0.667763	2.49001	0.960731	0.327003	0.441855	-0.94289	2.49001	1.85134	0.173627	0.25101	-1.3899	2.49001	3.56478	0.0590176	0.0934325	-0.722134	2.49001	0.929532	0.334985	0.610379
sll1241	-0.505435	3.3283	1.15393	0.282728	0.39621	-1.2497	3.3283	6.45908	0.0110387	0.0232594	-1.6302	3.3283	9.70712	0.00183555	0.00426022	-1.12476	3.3283	4.49912	0.0339124	0.164348
sll1242	-0.689286	6.54659	6.98394	0.00822443	0.0217465	-0.708108	6.54659	7.3524	0.00669733	0.0150297	-0.846609	6.54659	10.177	0.00142206	0.00338024	-0.157323	6.54659	0.348301	0.555076	0.785874
sll1244	-1.13287	7.33905	8.71877	0.00314951	0.0095843	-1.84553	7.33905	22.1152	2.56772e-06	1.34474e-05	-1.94154	7.33905	24.0964	9.16308e-07	4.0962e-06	-0.808668	7.33905	4.37175	0.0365394	0.171067
sll1245	0.0814874	4.81299	0.0852799	0.770266	0.83932	0.120972	4.81299	0.188395	0.664256	0.740927	0.656038	4.81299	5.47934	0.0192425	0.0348468	0.57455	4.81299	4.21377	0.0400972	0.181844
sll1247	2.35875	9.44439	49.9862	1.54833e-12	4.92884e-11	2.60868	9.44439	60.0214	9.38295e-15	2.34357e-13	2.92677	9.44439	73.6328	9.40891e-18	2.16672e-16	0.56802	9.44439	3.20979	0.0731987	0.256947
sll1249	-1.48149	3.82614	24.0759	9.26113e-07	7.93427e-06	-2.04605	3.82614	41.5036	1.17654e-10	1.40044e-09	-2.24356	3.82614	42.1292	8.54373e-11	7.04099e-10	-0.762075	3.82614	4.0726	0.0435841	0.191499
sll1250	0.12784	2.54648	0.0509501	0.821418	0.873901	0.969728	2.54648	3.2283	0.0723758	0.119656	1.37365	2.54648	6.36564	0.0116351	0.022286	1.24581	2.54648	5.28237	0.0215424	0.114858
sll1251	1.16463	4.26544	14.2659	0.000158713	0.000719752	1.36713	4.26544	19.9547	7.92974e-06	3.72428e-05	1.25154	4.26544	15.4834	8.32313e-05	0.00025911	0.0869068	4.26544	0.086667	0.768458	0.909968
sll1252	-1.1279	3.15027	7.65226	0.00567014	0.0158034	-0.810846	3.15027	4.15187	0.0415887	0.0740343	-0.938726	3.15027	4.98625	0.0255495	0.044746	0.189172	3.15027	0.175513	0.675258	0.862375
sll1253	0.540541	4.16233	2.97001	0.0848212	0.1496	0.244448	4.16233	0.585313	0.444237	0.544934	0.502492	4.16233	2.37175	0.123548	0.178544	-0.0380489	4.16233	0.014368	0.904589	0.963332
sll1254	0.705172	6.84659	7.08652	0.00776659	0.0207556	0.718899	6.84659	7.35225	0.00669788	0.0150297	0.963408	6.84659	13.0272	0.000307007	0.000844075	0.258236	6.84659	0.964012	0.326178	0.60209
sll1255	0.963843	2.36695	3.10486	0.0780591	0.1398	0.36319	2.36695	0.40734	0.523322	0.619398	0.662103	2.36695	1.2839	0.257175	0.329078	-0.30174	2.36695	0.300459	0.583595	0.802597
sll1258	-2.3512	1.73239	12.6453	0.000376506	0.00150742	-2.56011	1.73239	14.3529	0.000151544	0.00053024	-2.00511	1.73239	8.6203	0.00332437	0.00727374	0.346097	1.73239	0.180037	0.671341	0.859643
sll1260	-0.736652	7.74735	7.40678	0.00649786	0.0177299	-1.57924	7.74735	32.5325	1.17216e-08	9.80931e-08	-1.79081	7.74735	40.6522	1.81886e-10	1.44397e-09	-1.05416	7.74735	14.4659	0.000142718	0.00257448
sll1261	-0.426572	7.57576	2.673	0.102063	0.173326	-0.98932	7.57576	14.0353	0.000179406	0.000613191	-1.38311	7.57576	26.4466	2.70924e-07	1.33895e-06	-0.956537	7.57576	12.7845	0.0003495	0.00507647
sll1262	-0.715262	4.36394	4.49601	0.0339739	0.071124	-0.419644	4.36394	1.58474	0.208079	0.292481	-0.942141	4.36394	7.12592	0.00759773	0.0152001	-0.226879	4.36394	0.392761	0.530851	0.771881
sll1263	-0.932614	4.2462	7.87692	0.00500697	0.0142486	-1.09237	4.2462	10.6031	0.00112898	0.00312513	-1.43092	4.2462	16.1267	5.92417e-05	0.000190642	-0.498309	4.2462	1.83566	0.17546	0.424213
sll1265	0.47811	8.1087	3.51808	0.0607028	0.113843	0.527493	8.1087	4.27955	0.0385736	0.0695053	0.760356	8.1087	8.81544	0.00298693	0.00662297	0.282246	8.1087	1.23142	0.267132	0.540085
sll1267	-1.51268	7.64018	22.7452	1.8497e-06	1.45845e-05	-2.04567	7.64018	39.9803	2.56534e-10	2.86243e-09	-2.34648	7.64018	50.7879	1.02905e-12	1.06752e-11	-0.833805	7.64018	6.83179	0.00895495	0.06083
sll1268	1.77363	8.97416	47.6146	5.1882e-12	1.45225e-10	2.40446	8.97416	84.3741	4.09473e-20	2.37421e-18	3.20155	8.97416	140.886	1.7038e-32	2.63439e-30	1.42792	8.97416	32.2984	1.32221e-08	1.43107e-06
sll1270	-0.0276995	9.39779	0.0108294	0.917118	0.94476	-0.0360242	9.39779	0.0183057	0.892376	0.924846	-0.15183	9.39779	0.324072	0.569171	0.641082	-0.12413	9.39779	0.216571	0.641665	0.84389
sll1271	-2.0435	4.69417	41.422	1.22672e-10	2.53704e-09	-2.24606	4.69417	48.3779	3.5151e-12	5.48728e-11	-2.22705	4.69417	44.7344	2.25661e-11	1.98032e-10	-0.183549	4.69417	0.271844	0.602098	0.815608
sll1272	-0.0129699	6.37859	0.00175169	0.966616	0.977138	-0.11309	6.37859	0.132517	0.715836	0.783391	-0.0278268	6.37859	0.00791551	0.929106	0.942154	-0.0148569	6.37859	0.00225339	0.962139	0.987448
sll1273	0.32412	7.3392	0.972673	0.324015	0.439647	0.275583	7.3392	0.701963	0.402125	0.502579	0.781237	7.3392	5.58683	0.018096	0.0330286	0.457117	7.3392	1.93234	0.164502	0.408831
sll1274	-0.504111	4.22709	1.72285	0.189327	0.284981	-0.52412	4.22709	1.861	0.172509	0.249949	0.0385989	4.22709	0.0100567	0.920119	0.935915	0.542709	4.22709	1.91335	0.166592	0.411349
sll1275	-0.0211262	5.99129	0.00522236	0.94239	0.962246	-0.318755	5.99129	1.17472	0.278433	0.374202	-0.508342	5.99129	2.87349	0.0900497	0.135555	-0.487216	5.99129	2.6324	0.104703	0.315973
sll1276	0.461237	5.23554	2.10946	0.146391	0.230632	0.67708	5.23554	4.57794	0.0323861	0.0595457	0.589153	5.23554	3.35494	0.0670038	0.104331	0.127916	5.23554	0.162107	0.687224	0.868593
sll1277	-0.878446	2.8863	4.4404	0.0350979	0.0727939	0.163676	2.8863	0.187224	0.665237	0.741767	0.177025	2.8863	0.197553	0.656703	0.719405	1.05547	2.8863	5.91044	0.0150514	0.0893859
sll1280	-0.0686087	4.13333	0.0519433	0.819716	0.873429	-0.204665	4.13333	0.4549	0.500017	0.597233	-0.499661	4.13333	2.39563	0.121674	0.176138	-0.431052	4.13333	1.76054	0.184557	0.435084
sll1281	-1.10039	6.84115	10.5242	0.00117818	0.00414471	-1.20872	6.84115	12.6203	0.000381581	0.0011939	-1.29363	6.84115	14.2194	0.000162681	0.000476451	-0.193247	6.84115	0.321443	0.570742	0.795364
sll1282	-1.60632	5.10178	21.5404	3.46461e-06	2.528e-05	-1.45589	5.10178	17.9544	2.26263e-05	9.64141e-05	-2.25589	5.10178	37.5455	8.93057e-10	6.37309e-09	-0.649571	5.10178	3.03657	0.0814077	0.270831
sll1283	-1.24522	5.41386	13.724	0.000211735	0.00091302	-1.44618	5.41386	18.1527	2.03882e-05	8.74512e-05	-1.89559	5.41386	28.8414	7.85548e-08	4.1883e-07	-0.65037	5.41386	3.37388	0.0662377	0.241137
sll1284	-0.519969	3.26462	1.3765	0.240698	0.348127	-1.30605	3.26462	7.9298	0.00486273	0.0113023	-1.70911	3.26462	11.5266	0.000686059	0.00175404	-1.18914	3.26462	5.37887	0.0203821	0.110855
sll1285	-3.48071	2.73132	35.8123	2.17275e-09	3.47533e-08	-3.30077	2.73132	33.2337	8.172e-09	7.01971e-08	-3.30658	2.73132	29.3086	6.17205e-08	3.34011e-07	0.17413	2.73132	0.0533939	0.817259	0.933756
sll1286	0.902771	7.81698	8.75405	0.00308915	0.00943601	0.526891	7.81698	3.0002	0.0832544	0.134894	0.330976	7.81698	1.17819	0.277725	0.352255	-0.571794	7.81698	3.52781	0.0603474	0.229705
sll1289	-1.21329	2.25427	4.37492	0.0364716	0.0748062	-0.953617	2.25427	2.77119	0.0959749	0.151867	-1.61567	2.25427	6.46329	0.0110126	0.0212844	-0.402375	2.25427	0.349218	0.554556	0.785874
sll1290	-0.408667	6.17208	1.56958	0.210269	0.310761	-0.262138	6.17208	0.649262	0.420377	0.520978	-0.340724	6.17208	1.07357	0.300141	0.376859	0.0679434	6.17208	0.0423069	0.837036	0.943851
sll1291	0.619882	6.54542	4.48571	0.0341794	0.0713242	0.900726	6.54542	9.44992	0.00211159	0.00546756	0.828555	6.54542	7.89092	0.00496835	0.0104551	0.208672	6.54542	0.513651	0.473563	0.728785
sll1292	0.596442	6.17342	4.54698	0.0329768	0.0693495	1.2355	6.17342	19.6965	9.07682e-06	4.21637e-05	2.05586	6.17342	53.2653	2.91403e-13	3.24037e-12	1.45942	6.17342	28.2771	1.05132e-07	8.12771e-06
sll1293	1.27268	5.75196	16.097	6.01783e-05	0.000310157	1.98841	5.75196	39.4362	3.38963e-10	3.73089e-09	2.67646	5.75196	69.6693	7.01304e-17	1.3885e-15	1.40378	5.75196	21.8755	2.90921e-06	0.000127651
sll1294	0.451678	7.1605	2.45157	0.117408	0.193711	1.15931	7.1605	16.0414	6.19728e-05	0.000237855	1.75919	7.1605	35.9587	2.01543e-09	1.36335e-08	1.30751	7.1605	20.4728	6.04853e-06	0.000223177
sll1296	0.631234	7.12793	4.61701	0.0316564	0.0670505	1.15888	7.12793	15.4434	8.50133e-05	0.000315833	1.72534	7.12793	33.3776	7.58913e-09	4.63921e-08	1.09411	7.12793	13.9635	0.00018639	0.0031358
sll1297	0.303223	3.11446	0.431894	0.511061	0.620958	0.432091	3.11446	0.878402	0.34864	0.446385	0.631286	3.11446	1.79081	0.180828	0.244543	0.328062	3.11446	0.498359	0.480222	0.733434
sll1298	-0.48931	4.22113	2.4996	0.113875	0.189251	-0.496264	4.22113	2.55691	0.109813	0.170768	-0.588233	4.22113	3.27259	0.0704463	0.109288	-0.0989227	4.22113	0.0880203	0.766709	0.909242
sll1299	-0.898518	3.46448	7.43723	0.00638882	0.0174912	-0.982145	3.46448	8.66391	0.00324574	0.00799408	-1.83371	3.46448	22.6053	1.98934e-06	8.24952e-06	-0.935194	3.46448	5.19958	0.0225923	0.11928
sll1300	0.411359	3.22315	0.96761	0.325277	0.4406	0.454227	3.22315	1.1772	0.277927	0.373831	0.360543	3.22315	0.68815	0.406794	0.487763	-0.0508157	3.22315	0.0141976	0.905154	0.963618
sll1304	-0.758274	4.66169	6.7518	0.00936533	0.0242885	-1.32982	4.66169	19.4441	1.03588e-05	4.75072e-05	-1.95239	4.66169	35.3093	2.81292e-09	1.86019e-08	-1.19411	4.66169	12.6746	0.000370653	0.00532526
sll1305	-0.889167	4.40057	7.44087	0.0063759	0.0174705	-1.61437	4.40057	22.6268	1.9672e-06	1.07353e-05	-2.57778	4.40057	45.1415	1.83299e-11	1.63509e-10	-1.68861	4.40057	18.5606	1.64589e-05	0.000494833
sll1306	-0.670161	5.32603	6.99253	0.00818507	0.0216601	-1.4314	5.32603	29.5621	5.4154e-08	4.01457e-07	-2.30385	5.32603	62.5951	2.53879e-15	3.88842e-14	-1.63369	5.32603	30.7697	2.90545e-08	2.7747e-06
sll1307	1.13834	8.07585	14.0958	0.00017373	0.000776997	0.936068	8.07585	9.58776	0.00195878	0.00513331	0.321595	8.07585	1.13366	0.286997	0.362881	-0.816745	8.07585	7.29849	0.00690126	0.0497965
sll1308	-2.08171	2.69166	20.0238	7.64833e-06	5.13102e-05	-2.91716	2.69166	33.3851	7.56014e-09	6.51134e-08	-2.45258	2.69166	22.7838	1.81284e-06	7.55621e-06	-0.37087	2.69166	0.399266	0.527468	0.769959
sll1314	-0.836011	6.19857	9.23098	0.00237954	0.00758975	-1.25787	6.19857	20.2071	6.94935e-06	3.31344e-05	-1.34657	6.19857	22.3398	2.28428e-06	9.43648e-06	-0.510554	6.19857	3.20082	0.0736014	0.258082
sll1315	-1.86432	4.48575	22.2152	2.43737e-06	1.84478e-05	-2.4431	4.48575	35.5886	2.43714e-09	2.29374e-08	-2.51366	4.48575	34.7	3.84633e-09	2.45364e-08	-0.649344	4.48575	2.21693	0.136505	0.368132
sll1316	-1.69903	6.94695	32.2226	1.3748e-08	1.82204e-07	-2.00278	6.94695	43.661	3.90471e-11	5.15351e-10	-2.25025	6.94695	52.9928	3.34768e-13	3.67227e-12	-0.551213	6.94695	3.31907	0.0684804	0.247888
sll1317	-1.54341	7.54179	20.6765	5.43806e-06	3.75689e-05	-1.96329	7.54179	32.4947	1.19521e-08	9.97646e-08	-2.24528	7.54179	41.155	1.40624e-10	1.12743e-09	-0.70187	7.54179	4.27644	0.0386443	0.17731
sll1318	0.395594	1.92458	0.556538	0.455658	0.569485	0.405754	1.92458	0.593268	0.441158	0.541624	-0.881701	1.92458	1.77814	0.182378	0.246536	-1.2773	1.92458	3.97357	0.0462196	0.198773
sll1319	-0.65694	2.44668	1.75192	0.185636	0.279963	-1.41709	2.44668	7.11972	0.00762406	0.0167833	-0.884771	2.44668	2.75006	0.0972511	0.14525	-0.227831	2.44668	0.167813	0.682063	0.865778
sll1321	-2.47965	9.7252	41.7348	1.0453e-10	2.20395e-09	-3.32789	9.7252	69.8574	6.37505e-17	2.46426e-15	-4.02023	9.7252	95.2437	1.68335e-22	6.74795e-21	-1.54058	9.7252	16.9102	3.91908e-05	0.000987092
sll1322	-2.01466	9.56751	35.5141	2.53214e-09	3.9912e-08	-2.85583	9.56751	66.7416	3.09528e-16	9.66383e-15	-3.80166	9.56751	107.946	2.76225e-25	1.60161e-23	-1.787	9.56751	27.8177	1.33299e-07	9.61826e-06
sll1323	-2.892	5.95584	44.3941	2.68498e-11	6.50608e-10	-4.08795	5.95584	77.6414	1.23551e-18	5.98761e-17	-4.63482	5.95584	90.0698	2.29909e-21	7.69601e-20	-1.74282	5.95584	14.1703	0.00016699	0.00289955
sll1324	-2.3565	5.19974	22.7202	1.87383e-06	1.4661e-05	-3.48469	5.19974	43.9317	3.40033e-11	4.54357e-10	-4.31149	5.19974	58.1807	2.3911e-14	3.14329e-13	-1.95499	5.19974	12.8984	0.000328864	0.0048759
sll1325	-1.89367	5.24921	27.0977	1.93431e-07	1.96272e-06	-2.92049	5.24921	57.3071	3.72804e-14	8.40622e-13	-3.33616	5.24921	67.3283	2.2986e-16	4.03435e-15	-1.44249	5.24921	12.7607	0.00035397	0.00510817
sll1326	-1.9134	7.7118	24.2338	8.53214e-07	7.40745e-06	-2.68033	7.7118	44.7296	2.26209e-11	3.08613e-10	-3.5512	7.7118	71.5654	2.68213e-17	5.76746e-16	-1.6378	7.7118	17.2609	3.25824e-05	0.000839643
sll1327	-1.5255	7.84043	23.4295	1.29575e-06	1.06245e-05	-2.4902	7.84043	58.0176	2.59783e-14	5.94026e-13	-3.85199	7.84043	119.541	7.97217e-28	6.47141e-26	-2.32649	7.84043	48.3303	3.60148e-12	1.1694e-09
sll1329	-0.114525	5.01934	0.0498787	0.823275	0.875302	0.286636	5.01934	0.315183	0.574517	0.662684	-0.289111	5.01934	0.310995	0.57707	0.648131	-0.174586	5.01934	0.113135	0.736603	0.895451
sll1330	-0.643826	4.85228	2.91753	0.087622	0.152962	-0.630751	4.85228	2.8034	0.0940646	0.1495	-0.698097	4.85228	3.30988	0.0688644	0.106936	-0.0542713	4.85228	0.0195607	0.888771	0.958945
sll1333	-0.315796	5.01229	1.14975	0.283602	0.396522	-0.704867	5.01229	5.5617	0.0183576	0.0363902	-0.678005	5.01229	4.8913	0.0269923	0.0469437	-0.362209	5.01229	1.37005	0.241803	0.506866
sll1334	0.994091	6.95194	14.9118	0.000112658	0.000534797	0.978038	6.95194	14.4181	0.000146392	0.000516668	1.17629	6.95194	20.5704	5.74775e-06	2.20342e-05	0.182199	6.95194	0.516573	0.472307	0.728785
sll1336	0.53405	7.01971	4.42067	0.0355061	0.0731525	0.306423	7.01971	1.45111	0.228349	0.316589	0.297991	7.01971	1.35227	0.244882	0.31666	-0.236059	7.01971	0.857787	0.354359	0.630813
sll1338	0.717366	12.8688	5.44446	0.0196305	0.0454637	0.934472	12.8688	9.17497	0.00245347	0.00626292	1.07379	12.8688	12.0487	0.000518276	0.00136484	0.356425	12.8688	1.35452	0.24449	0.510266
sll1340	0.180633	2.84561	0.171905	0.678424	0.767007	0.125439	2.84561	0.0830679	0.773182	0.828607	0.431923	2.84561	0.929208	0.335069	0.412422	0.25129	2.84561	0.318976	0.572224	0.797087
sll1341	-0.571452	6.0379	4.82267	0.0280879	0.0605989	-0.698155	6.0379	7.12262	0.00761173	0.0167675	-0.587283	6.0379	4.92795	0.0264256	0.0460075	-0.0158312	6.0379	0.00351275	0.952738	0.985335
sll1342	-1.22698	8.69268	27.0638	1.96846e-07	1.99115e-06	-1.69458	8.69268	50.1699	1.40996e-12	2.39692e-11	-2.13524	8.69268	76.3655	2.35735e-18	5.88793e-17	-0.90826	8.69268	14.56	0.000135769	0.00250478
sll1343	-1.78742	4.91418	18.1996	1.98918e-05	0.000113712	-1.21243	4.91418	8.80449	0.00300491	0.00747086	-1.29834	4.91418	9.76559	0.00177809	0.00413571	0.489079	4.91418	1.31842	0.250876	0.520507
sll1344	-1.66727	4.62961	32.0463	1.5054e-08	1.97098e-07	-1.72614	4.62961	33.9567	5.63516e-09	5.01297e-08	-1.95505	4.62961	38.8307	4.62207e-10	3.45009e-09	-0.287788	4.62961	0.749699	0.386571	0.664099
sll1348	-0.973269	2.58383	3.86803	0.0492142	0.0962181	-1.11408	2.58383	4.97372	0.0257353	0.0489805	-1.80861	2.58383	10.3042	0.00132727	0.00317649	-0.835338	2.58383	1.96903	0.16055	0.403314
sll1349	-0.530876	4.10985	2.35696	0.124725	0.203458	-0.384367	4.10985	1.25066	0.263427	0.357438	-0.808473	4.10985	4.87958	0.0271762	0.0472131	-0.277598	4.10985	0.549658	0.458458	0.718789
sll1350	-0.924467	4.05031	8.76427	0.00307189	0.00940096	-1.67071	4.05031	25.5364	4.34116e-07	2.69517e-06	-1.74808	4.05031	24.9894	5.76479e-07	2.65507e-06	-0.823617	4.05031	5.12972	0.0235195	0.122384
sll1352	0.281251	3.46707	0.58907	0.442779	0.557249	0.487318	3.46707	1.81509	0.177898	0.256385	0.870668	3.46707	5.6442	0.0175132	0.0320548	0.589417	3.46707	2.66321	0.102693	0.314413
sll1353	-0.0424953	5.48968	0.0267245	0.870143	0.911365	-0.103955	5.48968	0.158522	0.690521	0.762627	-0.0842465	5.48968	0.100318	0.751448	0.801298	-0.0417512	5.48968	0.0244891	0.875647	0.954506
sll1354	-0.0568478	6.06217	0.0293695	0.863929	0.906944	-0.1366	6.06217	0.169319	0.680718	0.755432	0.324351	6.06217	0.948848	0.330013	0.407744	0.381199	6.06217	1.30676	0.252981	0.521874
sll1355	1.04761	6.38702	8.31128	0.00393995	0.0115665	1.34189	6.38702	13.5282	0.000235009	0.0007776	1.33142	6.38702	13.2034	0.000279441	0.000778169	0.283808	6.38702	0.630747	0.427082	0.697903
sll1356	0.0303573	7.15637	0.0103486	0.918973	0.94577	-0.120571	7.15637	0.162842	0.686554	0.759795	-0.392032	7.15637	1.69089	0.193484	0.259605	-0.42239	7.15637	1.96062	0.161447	0.404177
sll1358	0.363712	8.02167	2.06361	0.150852	0.235942	-0.0284466	8.02167	0.0126011	0.910622	0.936582	-0.836226	8.02167	10.5144	0.0011845	0.0028745	-1.19994	8.02167	21.4416	3.64764e-06	0.000148049
sll1359	0.308266	5.99414	1.38083	0.239959	0.347214	0.0575225	5.99414	0.0476111	0.827274	0.873481	-0.653264	5.99414	5.66576	0.0172992	0.0316989	-0.961529	5.99414	12.3155	0.000449216	0.00615445
sll1360	-0.00604271	5.61647	0.000561927	0.981088	0.986863	-0.113957	5.61647	0.197763	0.656532	0.73433	-0.0230945	5.61647	0.00786707	0.929323	0.942154	-0.0170518	5.61647	0.00427153	0.94789	0.985335
sll1362	-1.13608	6.37623	19.0138	1.29775e-05	7.92064e-05	-1.21655	6.37623	21.615	3.33243e-06	1.69333e-05	-1.61948	6.37623	35.9435	2.03126e-09	1.36836e-08	-0.483396	6.37623	3.19421	0.0738993	0.258568
sll1363	-0.358303	8.05575	1.48444	0.223081	0.327017	-0.830799	8.05575	7.85975	0.00505473	0.0117234	-0.89819	8.05575	9.09629	0.00256128	0.00577133	-0.539887	8.05575	3.30785	0.0689497	0.248235
sll1365	0.214082	5.77934	0.287083	0.592096	0.691808	0.587395	5.77934	2.16569	0.141121	0.210289	1.57228	5.77934	15.146	9.95097e-05	0.000305974	1.3582	5.77934	11.4557	0.000712751	0.00883322
sll1366	-0.778796	5.05396	6.40589	0.0113742	0.0287409	-0.591224	5.05396	3.75472	0.0526587	0.0909483	-0.767306	5.05396	5.93503	0.0148428	0.027698	0.0114905	5.05396	0.00128143	0.971444	0.990044
sll1367	-0.337681	6.11888	1.07331	0.3002	0.414963	-0.0689944	6.11888	0.0451725	0.831687	0.876448	-0.0875198	6.11888	0.0714476	0.789241	0.833116	0.250161	6.11888	0.577469	0.447306	0.710832
sll1369	-0.379071	4.79095	1.58436	0.208133	0.308588	-0.0311267	4.79095	0.0109735	0.916571	0.940912	0.267073	4.79095	0.790645	0.373905	0.45318	0.646143	4.79095	4.4528	0.034844	0.167365
sll1370	-1.48759	3.94827	21.2691	3.99119e-06	2.85449e-05	-1.14181	3.94827	13.1097	0.000293768	0.000945356	-1.54282	3.94827	20.4554	6.10385e-06	2.32347e-05	-0.0552366	3.94827	0.0222438	0.88144	0.956883
sll1371	-0.473012	4.36145	2.41673	0.120045	0.197061	-0.445158	4.36145	2.13013	0.144429	0.214596	-0.714007	4.36145	4.95201	0.0260604	0.0454691	-0.240995	4.36145	0.539329	0.462711	0.72189
sll1372	-1.0347	3.05319	7.12511	0.00760117	0.0203303	-1.85707	3.05319	19.7754	8.70956e-06	4.05157e-05	-1.60797	3.05319	13.6225	0.000223496	0.000633792	-0.573269	3.05319	1.52439	0.216956	0.477496
sll1373	-1.61553	2.4043	12.172	0.000485121	0.00188872	-1.36266	2.4043	9.04277	0.00263736	0.00665384	-1.21128	2.4043	6.45796	0.0110457	0.0213357	0.404252	2.4043	0.540634	0.46217	0.721584
sll1374	-0.216095	7.66326	0.706108	0.400739	0.514511	-0.0568552	7.66326	0.0490043	0.824805	0.872322	0.0110243	7.66326	0.00182806	0.965896	0.970679	0.22712	7.66326	0.772228	0.379529	0.658111
sll1376	0.410025	6.77145	2.36348	0.124205	0.203068	0.461346	6.77145	2.98897	0.0838336	0.135629	0.498847	6.77145	3.44584	0.0634111	0.0994832	0.088822	6.77145	0.110522	0.739551	0.897649
sll1377	-0.470579	6.57776	2.67769	0.101763	0.172997	-0.419727	6.57776	2.13237	0.144218	0.214411	-0.399659	6.57776	1.90288	0.167756	0.230221	0.07092	6.57776	0.0593588	0.807512	0.929765
sll1378	-1.27088	3.35699	11.1639	0.000834048	0.00306006	-1.37675	3.35699	12.8402	0.000339252	0.00107284	-1.59695	3.35699	14.9272	0.000111739	0.000338764	-0.326072	3.35699	0.540463	0.462241	0.721584
sll1380	-0.771962	5.01667	5.18838	0.0227384	0.051379	-0.19095	5.01667	0.330206	0.565538	0.655354	-0.15554	5.01667	0.212749	0.644621	0.70904	0.616422	5.01667	3.18876	0.0741464	0.258874
sll1381	0.039057	4.29076	0.0146918	0.903525	0.936103	-0.0785495	4.29076	0.0586745	0.808603	0.856608	0.389354	4.29076	1.4173	0.233848	0.305094	0.350297	4.29076	1.14392	0.284825	0.557126
sll1382	0.121794	7.38365	0.0759091	0.78292	0.84738	0.759818	7.38365	2.93296	0.086788	0.13989	0.335773	7.38365	0.574359	0.448532	0.524445	0.21398	7.38365	0.233754	0.628754	0.833972
sll1383	1.3665	6.878	13.3191	0.000262723	0.0011006	1.87601	6.878	24.5642	7.18749e-07	4.30586e-06	1.76649	6.878	21.7618	3.0869e-06	1.24511e-05	0.399986	6.878	1.19771	0.273781	0.547158
sll1384	0.0527134	6.26312	0.0300796	0.86231	0.90583	0.412473	6.26312	1.85384	0.173337	0.250814	0.566104	6.26312	3.44469	0.0634552	0.0994832	0.513391	6.26312	2.83572	0.0921892	0.293757
sll1386	1.93961	4.34522	28.7396	8.27942e-08	9.20661e-07	1.99418	4.34522	30.3	3.70131e-08	2.84117e-07	2.39242	4.34522	43.0393	5.36519e-11	4.51315e-10	0.452814	4.34522	1.98464	0.158902	0.401522
sll1387	1.18938	7.73195	20.3223	6.54337e-06	4.47291e-05	1.65721	7.73195	38.8513	4.57349e-10	4.83718e-09	2.15504	7.73195	63.8428	1.34752e-15	2.16604e-14	0.965658	7.73195	13.894	0.000193413	0.00323718
sll1388	2.36557	6.27958	57.2613	3.81585e-14	1.82207e-12	2.85183	6.27958	82.3637	1.13212e-19	6.33793e-18	3.47734	6.27958	118.775	1.17285e-27	8.85641e-26	1.11177	6.27958	15.5344	8.10162e-05	0.00167245
sll1389	3.15731	3.89372	47.2904	6.12111e-12	1.68246e-10	3.61725	3.89372	65.2494	6.59941e-16	1.9659e-14	4.00586	3.89372	79.7515	4.24582e-19	1.1585e-17	0.848542	3.89372	6.32976	0.0118728	0.0750022
sll1390	-0.27536	6.74277	0.609781	0.43487	0.548998	-0.0510749	6.74277	0.0210793	0.884563	0.918802	-0.140306	6.74277	0.157385	0.691576	0.749939	0.135054	6.74277	0.145147	0.703217	0.877367
sll1392	1.77279	4.25075	25.6694	4.0521e-07	3.7808e-06	1.99731	4.25075	33.1507	8.52837e-09	7.28727e-08	2.11476	4.25075	35.5997	2.42321e-09	1.61751e-08	0.34197	4.25075	1.18021	0.277313	0.54996
sll1393	-0.0679463	7.07327	0.0815979	0.775144	0.841841	0.0709778	7.07327	0.0892223	0.765168	0.822399	-0.0784769	7.07327	0.106861	0.743746	0.79447	-0.0105306	7.07327	0.00191782	0.965069	0.987448
sll1394	0.332151	4.31472	0.910519	0.339977	0.453163	0.276022	4.31472	0.624866	0.429245	0.529946	0.295	4.31472	0.675295	0.411212	0.491969	-0.0371509	4.31472	0.0109658	0.9166	0.969446
sll1395	0.512025	5.01307	3.10642	0.0779844	0.139744	0.416426	5.01307	2.04208	0.153	0.225507	0.219755	5.01307	0.533604	0.465096	0.540042	-0.29227	5.01307	0.972735	0.323999	0.599574
sll1396	0.529323	6.40216	2.7396	0.0978894	0.167464	0.95621	6.40216	8.92507	0.00281282	0.00705268	1.41032	6.40216	19.0643	1.26388e-05	4.54466e-05	0.880996	6.40216	7.68329	0.00557344	0.0415068
sll1397	0.117165	2.4806	0.0482458	0.826144	0.876917	-0.303222	2.4806	0.303462	0.58172	0.668144	0.735395	2.4806	1.888	0.169427	0.231927	0.61823	2.4806	1.34186	0.246707	0.513381
sll1398	-2.18947	4.61317	56.3572	6.04329e-14	2.72104e-12	-2.16401	4.61317	54.8335	1.31184e-13	2.8209e-12	-3.33741	4.61317	95.8986	1.20918e-22	5.09899e-21	-1.14794	4.61317	9.49941	0.00205537	0.0194816
sll1399	-1.8867	4.34746	41.249	1.34022e-10	2.75424e-09	-2.58403	4.34746	68.5446	1.2404e-16	4.33073e-15	-3.56523	4.34746	96.3375	9.68767e-23	4.13893e-21	-1.67853	4.34746	18.0122	2.19496e-05	0.00060915
sll1400	-0.671517	3.58297	3.6583	0.0557905	0.106185	-1.45031	3.58297	15.1805	9.77082e-05	0.000356871	-1.58667	3.58297	15.9783	6.40712e-05	0.00020376	-0.915154	3.58297	4.98529	0.0255637	0.130307
sll1401	0.628136	7.0769	2.35391	0.124969	0.203702	0.558872	7.0769	1.86267	0.172317	0.249783	1.11831	7.0769	7.33532	0.00676125	0.013704	0.490172	7.0769	1.44249	0.229736	0.49476
sll1404	0.0619897	2.22494	0.00562139	0.940234	0.96095	1.11021	2.22494	1.99788	0.15752	0.231119	3.16664	2.22494	17.5619	2.78099e-05	9.46528e-05	3.10465	2.22494	16.909	3.92162e-05	0.000987092
sll1406	-0.530204	3.64631	2.10157	0.147148	0.231599	-0.278548	3.64631	0.599432	0.438795	0.53948	-0.254563	3.64631	0.46346	0.496011	0.571319	0.275641	3.64631	0.507842	0.476075	0.730536
sll1407	-1.43071	2.06852	4.83317	0.0279172	0.0604044	-0.624212	2.06852	1.01137	0.314575	0.411036	-1.21607	2.06852	3.26202	0.0709018	0.109942	0.214634	2.06852	0.0862412	0.769011	0.909968
sll1408	0.147262	2.7615	0.106445	0.744228	0.818742	-0.476907	2.7615	1.02635	0.311016	0.408524	-0.368323	2.7615	0.556575	0.455644	0.531676	-0.515586	2.7615	1.10099	0.294049	0.565726
sll1409	0.429429	3.74846	1.22092	0.269181	0.380344	-0.121114	3.74846	0.0923408	0.761222	0.818982	-0.165102	3.74846	0.157916	0.691082	0.749731	-0.594531	3.74846	2.10444	0.146872	0.384591
sll1414	-0.503721	5.09351	1.65205	0.19868	0.296331	-0.065027	5.09351	0.0280819	0.866916	0.905105	-0.34956	5.09351	0.782218	0.376464	0.455771	0.154161	5.09351	0.149324	0.699182	0.876
sll1415	0.770156	4.62701	4.74632	0.029361	0.0628446	1.24733	4.62701	12.7224	0.00036131	0.0011368	1.38013	4.62701	15.0681	0.000103699	0.000317354	0.609975	4.62701	3.15938	0.075492	0.260768
sll1418	0.873715	6.78493	7.7226	0.00545338	0.0153043	0.947554	6.78493	9.06578	0.00260437	0.00659111	0.769056	6.78493	5.92502	0.0149274	0.0278399	-0.104659	6.78493	0.112413	0.737413	0.895765
sll1423	-0.577434	6.10361	2.09525	0.147758	0.232334	-0.278555	6.10361	0.492617	0.482762	0.580351	-0.848498	6.10361	4.40697	0.0357923	0.0604671	-0.271064	6.10361	0.450312	0.502187	0.750046
sll1424	-0.168995	4.50153	0.251795	0.615814	0.71133	-0.100611	4.50153	0.0890872	0.765341	0.822399	-0.298106	4.50153	0.734567	0.391407	0.471227	-0.12911	4.50153	0.135575	0.71272	0.88261
sll1425	0.783782	7.78122	7.84047	0.00510893	0.0144879	0.759056	7.78122	7.35372	0.0066924	0.0150297	0.709858	7.78122	6.39827	0.0114232	0.0219473	-0.0739233	7.78122	0.0705871	0.790484	0.924271
sll1426	0.608808	7.78877	3.33792	0.0677001	0.124685	0.517365	7.78877	2.41246	0.120373	0.184451	0.671759	7.78877	4.03994	0.0444354	0.0727593	0.0629512	7.78877	0.0359166	0.849688	0.946137
sll1427	1.45147	8.3376	27.2559	1.78234e-07	1.81989e-06	1.82605	8.3376	42.4007	7.43653e-11	9.18114e-10	2.22245	8.3376	61.2041	5.14539e-15	7.59414e-14	0.770981	8.3376	8.04565	0.00456132	0.035861
sll1428	-1.42012	3.27633	13.8545	0.000197525	0.000866709	-1.00342	3.27633	7.41923	0.00645303	0.0145507	-1.09025	3.27633	7.79837	0.00522935	0.0109264	0.329872	3.27633	0.588953	0.442824	0.707113
sll1429	0.0307965	5.94202	0.00545376	0.94113	0.961564	0.0884726	5.94202	0.0449177	0.832155	0.876448	-0.0511262	5.94202	0.0148112	0.903136	0.925365	-0.0819227	5.94202	0.0379805	0.845482	0.945996
sll1430	-1.10712	3.23791	8.09969	0.00442728	0.0127781	-1.07932	3.23791	7.69163	0.00554776	0.0126856	-1.48752	3.23791	12.1727	0.00048495	0.00128647	-0.380404	3.23791	0.698427	0.403313	0.677824
sll1432	1.32382	7.13846	14.2477	0.000160254	0.000723706	1.35155	7.13846	14.8255	0.000117929	0.000424574	1.2622	7.13846	12.8783	0.000332412	0.000910837	-0.0616274	7.13846	0.0321124	0.857781	0.949613
sll1433	2.10175	7.0641	51.0509	9.00002e-13	3.01269e-11	2.2558	7.0641	58.3694	2.17239e-14	5.11141e-13	2.28665	7.0641	59.3915	1.29225e-14	1.763e-13	0.184904	7.0641	0.443079	0.50564	0.75278
sll1434	1.13993	8.30521	19.0652	1.26328e-05	7.78341e-05	1.53353	8.30521	34.0028	5.50337e-09	4.90919e-08	2.06161	8.30521	59.6181	1.15174e-14	1.59136e-13	0.921679	8.30521	12.7807	0.000350209	0.00507647
sll1435	0.0983591	7.64665	0.134032	0.714288	0.794006	0.20218	7.64665	0.566367	0.451706	0.552426	0.452284	7.64665	2.81457	0.0934118	0.139902	0.353925	7.64665	1.72653	0.188854	0.439577
sll1439	-0.421282	4.71029	1.19343	0.274638	0.386374	-0.537769	4.71029	1.9248	0.165329	0.240727	-1.18149	4.71029	8.42075	0.00370963	0.00801409	-0.760212	4.71029	3.44676	0.063376	0.236068
sll1440	-1.22394	4.85474	19.1471	1.2102e-05	7.49908e-05	-1.62405	4.85474	32.035	1.51417e-08	1.23531e-07	-2.14171	4.85474	48.0499	4.15508e-12	3.99158e-11	-0.917773	4.85474	8.28156	0.00400498	0.0324294
sll1441	-0.495935	5.54785	0.887656	0.346113	0.459644	-0.290439	5.54785	0.305291	0.580584	0.667312	-0.402723	5.54785	0.578741	0.446806	0.523369	0.0932122	5.54785	0.0308867	0.860493	0.950348
sll1442	0.144285	3.99063	0.186042	0.666231	0.756646	0.00254321	3.99063	5.63951e-05	0.994008	0.995564	0.164478	3.99063	0.224282	0.635797	0.70052	0.0201935	3.99063	0.00339466	0.953539	0.985335
sll1443	-0.0531969	6.02474	0.0428672	0.835975	0.884461	-0.153489	6.02474	0.354351	0.55166	0.644181	-0.29163	6.02474	1.22714	0.267964	0.341342	-0.238433	6.02474	0.816677	0.366153	0.644041
sll1444	-0.236126	5.05637	0.553676	0.456819	0.570497	-0.159435	5.05637	0.253275	0.614778	0.695535	0.123696	5.05637	0.149645	0.698875	0.75566	0.359823	5.05637	1.24425	0.264654	0.536746
sll1446	0.196973	4.7975	0.315249	0.574477	0.676824	0.624697	4.7975	3.24273	0.071741	0.118848	0.832226	4.7975	5.61549	0.0178024	0.0325292	0.635253	4.7975	3.30582	0.069035	0.248235
sll1447	0.269429	5.74947	0.396293	0.52901	0.635948	0.422229	5.74947	0.974929	0.323454	0.420607	0.105506	5.74947	0.0599221	0.806619	0.847054	-0.163923	5.74947	0.145007	0.703353	0.877367
sll1450	2.44469	6.79063	40.5728	1.89423e-10	3.77336e-09	2.55219	6.79063	43.9122	3.43438e-11	4.57026e-10	0.979027	6.79063	6.74466	0.00940287	0.0184925	-1.46566	6.79063	15.5488	8.04011e-05	0.00167245
sll1451	2.18329	5.92487	38.1587	6.52178e-10	1.15088e-08	2.32218	5.92487	42.9123	5.72506e-11	7.23318e-10	1.02473	5.92487	8.27153	0.00402716	0.00862545	-1.15857	5.92487	11.4384	0.000719413	0.00886283
sll1452	1.69871	6.89147	32.5374	1.16918e-08	1.58181e-07	2.03415	6.89147	45.9743	1.19816e-11	1.73403e-10	0.903225	6.89147	9.17291	0.00245624	0.00556989	-0.795482	6.89147	7.43498	0.00639682	0.0468859
sll1453	1.40119	5.77356	28.2028	1.09244e-07	1.17068e-06	1.91462	5.77356	52.6248	4.03754e-13	7.53442e-12	0.280166	5.77356	1.00813	0.31535	0.393219	-1.12103	5.77356	17.4294	2.98174e-05	0.000780783
sll1454	-0.477874	3.99799	1.4428	0.229687	0.334738	-0.216685	3.99799	0.300691	0.583449	0.668948	-1.41354	3.99799	10.5616	0.00115459	0.00280611	-0.935663	3.99799	4.50602	0.0337758	0.163931
sll1455	-1.02483	4.59472	7.62095	0.00576941	0.0160388	-1.52443	4.59472	15.9224	6.59948e-05	0.000251713	-2.12236	4.59472	27.1719	1.86146e-07	9.38534e-07	-1.09753	4.59472	7.1308	0.00757709	0.0537179
sll1456	-1.26951	3.20197	12.1972	0.000478609	0.00187234	-1.60679	3.20197	18.1462	2.04576e-05	8.76328e-05	-2.09806	3.20197	24.8562	6.17696e-07	2.83435e-06	-0.828544	3.20197	3.27232	0.0704581	0.250578
sll1457	-2.31753	3.34937	26.516	2.61359e-07	2.54081e-06	-2.62129	3.34937	32.2741	1.33887e-08	1.10338e-07	-2.40335	3.34937	25.5292	4.35748e-07	2.0625e-06	-0.0858284	3.34937	0.0267526	0.870076	0.952225
sll1459	-1.16757	2.73594	8.13115	0.00435111	0.0125694	-0.769468	2.73594	3.77443	0.0520416	0.0900261	-1.61175	2.73594	12.1124	0.00050088	0.00132439	-0.444183	2.73594	0.756255	0.384503	0.661371
sll1461	0.519412	4.63058	2.67367	0.102021	0.173326	0.383728	4.63058	1.44545	0.229259	0.317579	0.515757	4.63058	2.51251	0.112946	0.165644	-0.00365558	4.63058	0.000130565	0.990883	0.996716
sll1462	0.220758	4.02537	0.327753	0.566985	0.669942	0.34466	4.02537	0.802446	0.370363	0.468281	0.485639	4.02537	1.52666	0.216614	0.285797	0.264881	4.02537	0.461587	0.496883	0.744522
sll1463	1.09483	8.99716	18.0029	2.20574e-05	0.000124557	1.21086	8.99716	21.9227	2.8385e-06	1.46761e-05	1.54145	8.99716	34.9353	3.40843e-09	2.20023e-08	0.44662	8.99716	3.0715	0.0796759	0.267813
sll1464	-0.861221	4.00864	7.76382	0.0053303	0.0149978	-0.660955	4.00864	4.71633	0.0298774	0.0554353	-0.386356	4.00864	1.52484	0.216888	0.285926	0.474865	4.00864	2.06387	0.150826	0.389711
sll1466	-1.32732	3.56	13.892	0.000193616	0.000854172	-1.85224	3.56	24.7576	6.50134e-07	3.91648e-06	-2.08757	3.56	26.7673	2.29491e-07	1.14993e-06	-0.760256	3.56	3.11177	0.0777283	0.265109
sll1468	-2.12511	5.97476	53.2436	2.94651e-13	1.0872e-11	-2.04951	5.97476	49.7325	1.76204e-12	2.93402e-11	-2.5437	5.97476	70.0157	5.88347e-17	1.18656e-15	-0.418588	5.97476	1.88029	0.170301	0.416917
sll1469	-1.34039	3.42739	9.11774	0.00253142	0.00800343	-1.27802	3.42739	8.31083	0.00394093	0.00947866	-1.47603	3.42739	10.1785	0.00142084	0.00337984	-0.135645	3.42739	0.0773275	0.780952	0.918031
sll1470	0.700769	6.5158	7.53413	0.00605409	0.0167441	0.928968	6.5158	13.2496	0.000272644	0.000886161	0.999384	6.5158	15.0734	0.000103411	0.00031677	0.298615	6.5158	1.39551	0.237477	0.503777
sll1471	-4.22923	5.47344	120.735	4.36737e-28	2.83617e-25	-5.34058	5.47344	161.644	4.9484e-37	3.21349e-34	-5.7912	5.47344	162.55	3.13651e-37	7.83405e-35	-1.56197	5.47344	9.91639	0.00163813	0.016674
sll1472	-0.28623	5.86149	0.45025	0.502216	0.615357	-0.527456	5.86149	1.51197	0.218839	0.305753	0.340735	5.86149	0.637155	0.424743	0.504256	0.626965	5.86149	2.13323	0.144136	0.380806
sll1473	-1.06968	2.98038	7.19225	0.00732189	0.0196643	-2.49133	2.98038	29.6366	5.21126e-08	3.88095e-07	-1.32933	2.98038	9.48316	0.00207366	0.0047618	-0.259651	2.98038	0.31823	0.572673	0.797371
sll1475	-1.1395	3.21959	9.48103	0.00207607	0.00675863	-1.54542	3.21959	16.2431	5.57113e-05	0.00021664	-1.20383	3.21959	9.30666	0.00228323	0.0052062	-0.0643298	3.21959	0.0229817	0.879505	0.956123
sll1476	0.0136096	2.26478	0.000652581	0.97962	0.985997	0.00644175	2.26478	0.000123366	0.991138	0.9942	-0.0956778	2.26478	0.0291929	0.864334	0.892318	-0.109287	2.26478	0.0375707	0.846308	0.946135
sll1477	-0.536925	3.77833	2.73213	0.098348	0.168072	-0.444263	3.77833	1.88038	0.170291	0.247288	-0.595991	3.77833	3.00623	0.0829448	0.125969	-0.059066	3.77833	0.027583	0.868093	0.952012
sll1479	-0.445401	4.28583	1.31887	0.250795	0.359846	-0.495595	4.28583	1.63091	0.201578	0.28532	-0.641653	4.28583	2.57109	0.108833	0.16019	-0.196252	4.28583	0.234455	0.62824	0.833972
sll1481	1.58314	6.67968	28.9139	7.56673e-08	8.54956e-07	1.81914	6.67968	37.8929	7.47361e-10	7.67937e-09	2.18947	6.67968	53.7072	2.32709e-13	2.64197e-12	0.606331	6.67968	4.61032	0.0317801	0.157062
sll1482	1.34696	4.04987	9.03368	0.00265051	0.00833128	1.62544	4.04987	13.2788	0.000268424	0.000875073	1.94047	4.04987	18.3797	1.80977e-05	6.35967e-05	0.593513	4.04987	1.97454	0.159967	0.403272
sll1483	0.306414	6.10439	0.774659	0.37878	0.494133	0.379296	6.10439	1.1885	0.275633	0.37167	0.476052	6.10439	1.84265	0.17464	0.237959	0.169638	6.10439	0.235939	0.627154	0.83386
sll1484	-0.769579	4.88641	6.78076	0.00921458	0.0239549	-0.403034	4.88641	1.9263	0.165164	0.240632	-0.343893	4.88641	1.33569	0.247796	0.319592	0.425686	4.88641	1.92772	0.165009	0.409391
sll1485	-0.774046	3.97406	5.8099	0.0159362	0.0384148	-0.946494	3.97406	8.46494	0.00362058	0.00878627	-1.4144	3.97406	16.0706	6.10232e-05	0.0001956	-0.640358	3.97406	3.05689	0.0803956	0.269445
sll1486	-0.619845	4.96969	4.97301	0.0257458	0.0565223	-0.890087	4.96969	9.94401	0.00161374	0.00430552	-0.699292	4.96969	5.91073	0.015049	0.0280416	-0.0794466	4.96969	0.0732854	0.786612	0.921083
sll1488	-0.140127	6.49071	0.248547	0.6181	0.713463	-0.295431	6.49071	1.0964	0.295057	0.390836	-0.507603	6.49071	3.14328	0.0762401	0.117267	-0.367475	6.49071	1.6437	0.199819	0.454316
sll1489	-0.0967347	4.19861	0.105776	0.745005	0.818742	-0.69445	4.19861	5.03577	0.024829	0.0475197	-0.74984	4.19861	5.41707	0.0199408	0.0359511	-0.653105	4.19861	4.05196	0.0441201	0.192014
sll1491	-1.3598	5.29432	14.2587	0.000159324	0.000721514	-1.77748	5.29432	23.4896	1.25592e-06	7.11688e-06	-1.49957	5.29432	16.572	4.68369e-05	0.000154239	-0.139769	5.29432	0.141664	0.706632	0.879431
sll1495	-0.859925	4.28454	7.0163	0.00807712	0.0213918	-1.3261	4.28454	15.7185	7.35014e-05	0.000277511	-1.54051	4.28454	19.1448	1.21166e-05	4.39582e-05	-0.680581	4.28454	3.53373	0.0601325	0.229705
sll1496	0.162295	6.08564	0.415312	0.519286	0.627277	0.180798	6.08564	0.514944	0.473006	0.571374	0.482621	6.08564	3.61127	0.0573891	0.0910765	0.320326	6.08564	1.60084	0.205784	0.462493
sll1498	-0.186803	6.66187	0.346367	0.556177	0.661504	0.015256	6.66187	0.00232113	0.961574	0.97175	0.39283	6.66187	1.52825	0.216375	0.285669	0.579633	6.66187	3.3014	0.0692207	0.248236
sll1499	0.818626	9.24154	9.90822	0.00164542	0.00550117	1.23203	9.24154	22.1334	2.54348e-06	1.33852e-05	1.61645	9.24154	37.3501	9.87155e-10	6.98321e-09	0.797828	9.24154	9.46902	0.0020897	0.0196675
sll1500	0.0444752	3.76597	0.0143769	0.904559	0.936796	-0.136481	3.76597	0.132618	0.715733	0.783391	-0.300751	3.76597	0.589853	0.442476	0.51924	-0.345226	3.76597	0.774108	0.378949	0.657642
sll1501	0.444125	8.6098	2.14367	0.143159	0.22675	0.735569	8.6098	5.84682	0.0156052	0.0316491	1.34911	8.6098	19.2312	1.15806e-05	4.23449e-05	0.904986	8.6098	8.83375	0.0029571	0.025811
sll1502	0.443683	8.62594	3.02522	0.0819794	0.145473	0.351286	8.62594	1.89711	0.168402	0.244873	0.407734	8.62594	2.54388	0.110722	0.16275	-0.0359486	8.62594	0.0198878	0.887851	0.958945
sll1503	0.0485435	7.96993	0.0189721	0.890447	0.926989	0.058025	7.96993	0.0270856	0.869277	0.906404	0.261655	7.96993	0.548806	0.458806	0.53415	0.213111	7.96993	0.364211	0.546177	0.780953
sll1504	-0.57205	2.24228	0.565226	0.452162	0.566424	-2.05373	2.24228	6.06849	0.0137614	0.0283524	-1.97219	2.24228	5.27525	0.0216307	0.0386331	-1.40014	2.24228	2.61934	0.105568	0.318159
sll1505	-0.0302074	2.31099	0.00320408	0.95486	0.968279	-1.58707	2.31099	7.01846	0.00806734	0.0176276	-1.73073	2.31099	7.19373	0.00731586	0.0146905	-1.70052	2.31099	6.89783	0.00863004	0.0596207
sll1507	-0.826613	6.07354	4.04904	0.0441964	0.0879747	-0.864324	6.07354	4.4136	0.0356536	0.0647952	-1.05666	6.07354	6.43373	0.0111973	0.0215516	-0.230051	6.07354	0.306435	0.579876	0.801216
sll1508	-1.21261	2.96458	9.38953	0.00218228	0.00703661	-1.08943	2.96458	7.72952	0.00543251	0.012457	-1.65656	2.96458	14.0121	0.000181637	0.000524712	-0.443959	2.96458	0.844871	0.358007	0.635218
sll1509	-1.61684	2.89707	9.14951	0.00248785	0.00788102	-1.22636	2.89707	5.57854	0.0181818	0.03613	-2.48791	2.89707	17.078	3.58754e-05	0.000120214	-0.871072	2.89707	1.84823	0.173989	0.421813
sll1510	-1.14131	3.77525	10.2418	0.00137296	0.00471246	-1.1525	3.77525	10.357	0.00128985	0.00353133	-0.871175	3.77525	5.67692	0.0171895	0.0315513	0.270132	3.77525	0.486793	0.485361	0.73609
sll1512	1.3292	5.63964	20.2221	6.89506e-06	4.70342e-05	1.64598	5.63964	31.1521	2.38577e-08	1.90803e-07	2.00975	5.63964	45.553	1.48567e-11	1.34372e-10	0.680553	5.63964	5.89824	0.015156	0.0894756
sll1513	1.19364	9.10444	21.9956	2.73283e-06	2.04458e-05	1.33907	9.10444	27.5148	1.55897e-07	1.06568e-06	1.40193	9.10444	29.9896	4.34372e-08	2.39458e-07	0.208285	9.10444	0.690702	0.405926	0.679862
sll1514	2.11789	10.6468	23.0974	1.54e-06	1.24858e-05	3.43645	10.6468	54.7211	1.38908e-13	2.94794e-12	4.72551	10.6468	91.7991	9.59384e-22	3.46124e-20	2.60762	10.6468	33.9807	5.56619e-09	6.45479e-07
sll1515	0.175476	11.1278	0.12188	0.727005	0.804288	-0.0958919	11.1278	0.0364087	0.848674	0.890354	-0.105981	11.1278	0.0444592	0.833002	0.868492	-0.281457	11.1278	0.313146	0.575756	0.798556
sll1516	-0.271367	3.84005	0.706456	0.400623	0.514511	-0.548486	3.84005	2.77349	0.0958368	0.151722	-1.23306	3.84005	11.3967	0.000735758	0.00186653	-0.961693	3.84005	6.72614	0.00950102	0.063477
sll1520	-0.792872	2.06699	2.18339	0.139507	0.222157	-0.365626	2.06699	0.499457	0.479739	0.578001	-0.492445	2.06699	0.785198	0.375556	0.454842	0.300427	2.06699	0.252912	0.615032	0.826919
sll1521	0.68769	5.71866	4.16559	0.041253	0.0829917	0.934052	5.71866	7.70512	0.00550643	0.0126	1.30014	5.71866	14.6662	0.000128327	0.000385454	0.612446	5.71866	3.39524	0.0653849	0.239352
sll1522	0.759072	3.35129	5.09163	0.0240416	0.0537624	0.262364	3.35129	0.560024	0.454251	0.554702	0.429551	3.35129	1.3852	0.239217	0.310446	-0.329522	3.35129	0.908981	0.340385	0.615384
sll1524	-1.35592	5.25949	22.2718	2.36661e-06	1.79962e-05	-1.54358	5.25949	28.1607	1.11646e-07	7.88075e-07	-1.53423	5.25949	26.5978	2.50534e-07	1.24643e-06	-0.178304	5.25949	0.341501	0.558964	0.788084
sll1525	-0.398768	9.47147	1.88185	0.170124	0.260562	-1.37937	9.47147	21.7148	3.16335e-06	1.615e-05	-1.93276	9.47147	41.0243	1.50346e-10	1.19944e-09	-1.53399	9.47147	26.43	2.73268e-07	1.70635e-05
sll1526	-1.37538	6.045	7.07952	0.00779698	0.0207797	-1.15671	6.045	5.07014	0.0243414	0.0467119	-1.07975	6.045	4.40881	0.0357537	0.0604333	0.295628	6.045	0.332087	0.564433	0.792011
sll1527	-0.926777	5.04937	11.2578	0.000792871	0.00292884	-1.11389	5.04937	15.826	6.94431e-05	0.000263106	-1.1545	5.04937	15.9929	6.35807e-05	0.000202399	-0.227723	5.04937	0.591073	0.442004	0.706826
sll1528	-2.15013	5.36676	53.9659	2.04001e-13	7.70224e-12	-2.46292	5.36676	67.8695	1.74685e-16	5.78777e-15	-2.66634	5.36676	73.0343	1.27415e-17	2.87303e-16	-0.516208	5.36676	2.58335	0.107993	0.322591
sll1530	-2.28323	4.50478	46.1049	1.12091e-11	2.90801e-10	-2.9996	4.50478	71.311	3.05132e-17	1.22317e-15	-2.7866	4.50478	58.7388	1.80058e-14	2.43603e-13	-0.503364	4.50478	1.69173	0.193372	0.444797
sll1531	-2.83402	5.71442	88.8029	4.36179e-21	9.44181e-19	-3.67671	5.71442	133.056	8.78774e-31	2.03813e-28	-4.10828	5.71442	145.644	1.5529e-33	3.15142e-31	-1.27425	5.71442	13.4096	0.000250345	0.00400428
sll1532	-0.736328	5.15646	6.85846	0.00882227	0.0231202	-0.987249	5.15646	12.0282	0.000524022	0.00157985	-1.4751	5.15646	24.0947	9.17134e-07	4.0962e-06	-0.738775	5.15646	5.87174	0.0153859	0.0905035
sll1533	0.808431	8.49424	4.36163	0.036757	0.0752523	0.72559	8.49424	3.52115	0.0605906	0.102574	0.761701	8.49424	3.86934	0.049176	0.0792429	-0.0467301	8.49424	0.0147619	0.903296	0.962587
sll1534	-0.302465	4.93787	0.819824	0.365232	0.480513	-0.584068	4.93787	2.99922	0.0833048	0.134908	-0.623831	4.93787	3.29178	0.0696275	0.108069	-0.321366	4.93787	0.861559	0.353303	0.629969
sll1535	0.280254	9.47606	1.18929	0.275473	0.387045	0.0764302	9.47606	0.0884948	0.7661	0.822866	-0.155819	9.47606	0.366296	0.54503	0.617055	-0.436073	9.47606	2.86184	0.0907037	0.291001
sll1536	-0.934327	7.10455	10.1498	0.00144317	0.00491193	-1.29565	7.10455	19.1024	1.23889e-05	5.59482e-05	-1.35685	7.10455	20.5445	5.82611e-06	2.2282e-05	-0.422521	7.10455	2.02085	0.155152	0.395675
sll1537	-1.40152	2.49242	7.57617	0.00591449	0.016386	-1.47489	2.49242	8.33411	0.00389075	0.00937882	-2.07028	2.49242	12.8662	0.000334565	0.000915192	-0.668762	2.49242	1.13503	0.286704	0.558856
sll1538	-1.48945	3.30201	17.5707	2.76826e-05	0.000153388	-1.72667	3.30201	22.4277	2.18208e-06	1.175e-05	-2.23989	3.30201	30.1397	4.02014e-08	2.23517e-07	-0.75044	3.30201	2.77568	0.0957063	0.301122
sll1540	-0.914193	3.03235	4.80818	0.0283249	0.0609876	-0.676758	3.03235	2.68965	0.101002	0.158508	-0.66367	3.03235	2.39593	0.121651	0.176138	0.250523	3.03235	0.301958	0.582658	0.802251
sll1541	2.41325	5.53589	38.4853	5.51678e-10	1.00072e-08	3.11812	5.53589	63.46	1.6366e-15	4.50342e-14	3.34407	5.53589	71.6534	2.56517e-17	5.59001e-16	0.930823	5.53589	7.17792	0.00738063	0.0525235
sll1542	1.02675	4.30783	9.89275	0.00165932	0.00553162	0.888614	4.30783	7.27537	0.00699067	0.0156112	0.890136	4.30783	6.93916	0.00843289	0.0167677	-0.136612	4.30783	0.180585	0.670871	0.859636
sll1543	0.255515	3.42564	0.270461	0.603023	0.700793	0.269127	3.42564	0.298254	0.584979	0.669992	0.993523	3.42564	4.10333	0.0427988	0.070399	0.738008	3.42564	2.31948	0.127762	0.355479
sll1544	-0.0189494	3.34781	0.00255195	0.959711	0.971883	-0.0711062	3.34781	0.0357911	0.849948	0.890826	0.261621	3.34781	0.462389	0.49651	0.57169	0.28057	3.34781	0.526661	0.468014	0.725926
sll1545	0.642253	5.52364	3.88709	0.0486587	0.095235	0.672928	5.52364	4.25167	0.0392118	0.0704596	0.969725	5.52364	8.69971	0.0031826	0.0069871	0.327472	5.52364	1.02733	0.310786	0.584659
sll1546	0.121829	6.09892	0.209794	0.646929	0.739901	0.135405	6.09892	0.258766	0.610969	0.691707	0.156996	6.09892	0.339356	0.560201	0.632247	0.0351669	6.09892	0.0170601	0.89608	0.961525
sll1547	0.90695	4.38128	4.73009	0.0296394	0.0632735	0.733716	4.38128	3.05532	0.0804733	0.130946	1.06476	4.38128	6.34824	0.0117498	0.0224552	0.157811	4.38128	0.147914	0.700536	0.876
sll1550	0.0561451	6.48085	0.0362667	0.848966	0.894416	0.422053	6.48085	2.05797	0.151412	0.223471	0.948058	6.48085	10.2667	0.00135449	0.00323385	0.891913	6.48085	9.10157	0.0025539	0.023099
sll1552	0.436126	2.22929	0.742055	0.389003	0.503225	-0.103567	2.22929	0.0383684	0.844705	0.887337	0.110313	2.22929	0.0392998	0.842856	0.875761	-0.325814	2.22929	0.366172	0.545098	0.780953
sll1553	-0.956698	6.5907	5.8677	0.0154212	0.0373755	-1.05116	6.5907	7.05677	0.00789662	0.0172849	-1.09461	6.5907	7.56247	0.00595962	0.0122552	-0.137916	6.5907	0.121209	0.727727	0.889992
sll1555	0.831605	5.98592	7.8885	0.00497502	0.0141825	0.863836	5.98592	8.51396	0.00352432	0.00857831	0.694301	5.98592	5.3745	0.0204332	0.0367571	-0.137304	5.98592	0.217537	0.640923	0.84389
sll1556	0.661854	5.52765	6.4365	0.0111799	0.0282938	0.486559	5.52765	3.44567	0.0634176	0.106748	0.49524	5.52765	3.43474	0.0638387	0.099896	-0.166614	5.52765	0.403715	0.525177	0.769275
sll1557	0.293834	4.10616	0.771137	0.379866	0.495351	0.302398	4.10616	0.816473	0.366213	0.46449	-0.286653	4.10616	0.637782	0.424515	0.50417	-0.580487	4.10616	2.66471	0.102597	0.314413
sll1558	-0.170861	5.31398	0.36482	0.545841	0.65088	-0.248188	5.31398	0.762995	0.382393	0.481066	-0.618016	5.31398	4.38297	0.0362997	0.0611969	-0.447155	5.31398	2.27062	0.131847	0.361847
sll1559	-0.327728	7.9279	1.68837	0.193816	0.290679	-0.608635	7.9279	5.77	0.016302	0.0329276	-0.94992	7.9279	13.7079	0.000213557	0.000608262	-0.622193	7.9279	5.90964	0.0150582	0.0893859
sll1561	0.817306	7.10426	9.18794	0.00243615	0.00773235	0.952812	7.10426	12.459	0.000415977	0.00128636	1.38037	7.10426	25.7175	3.95235e-07	1.89561e-06	0.563066	7.10426	4.46305	0.0346356	0.167105
sll1562	-0.339279	4.54435	0.919472	0.337614	0.451279	-0.355335	4.54435	1.0007	0.317142	0.414224	-0.250891	4.54435	0.4803	0.488287	0.563621	0.0883882	4.54435	0.0581522	0.809441	0.929765
sll1563	-0.256273	6.63146	0.493923	0.482183	0.596664	-1.04085	6.63146	7.88727	0.0049784	0.0115546	-0.891052	6.63146	5.76008	0.0163943	0.0302285	-0.634778	6.63146	2.93222	0.0868279	0.28324
sll1564	1.32014	7.83801	21.2493	4.03254e-06	2.87772e-05	1.95784	7.83801	45.48	1.54203e-11	2.20572e-10	2.25928	7.83801	59.328	1.33464e-14	1.81321e-13	0.939145	7.83801	11.1945	0.000820396	0.0097576
sll1566	-0.0408074	6.67017	0.0220226	0.882027	0.921178	0.18414	6.67017	0.45023	0.502226	0.599092	0.339362	6.67017	1.51269	0.21873	0.288003	0.380169	6.67017	1.8914	0.169045	0.415339
sll1568	0.569535	6.2917	3.7574	0.0525742	0.101311	0.649197	6.2917	4.87746	0.0272096	0.0512171	0.716506	6.2917	5.85133	0.0155653	0.0288802	0.146971	6.2917	0.25184	0.615782	0.827115
sll1570	-0.35698	3.70543	0.769412	0.380399	0.495648	-0.575148	3.70543	1.95448	0.162105	0.237418	-0.183893	3.70543	0.193553	0.659976	0.721772	0.173087	3.70543	0.165603	0.68405	0.867029
sll1571	0.132941	7.65089	0.267114	0.605274	0.702635	0.15412	7.65089	0.358956	0.549087	0.64225	-0.175903	7.65089	0.460102	0.497576	0.572513	-0.308845	7.65089	1.41802	0.233729	0.499617
sll1572	-0.124246	4.9952	0.188083	0.664517	0.755228	-0.296236	4.9952	1.04681	0.306243	0.40307	-0.430573	4.9952	2.0789	0.149348	0.209408	-0.306327	4.9952	1.0415	0.307472	0.580781
sll1573	0.779541	4.21388	3.9816	0.0459998	0.0908523	1.01842	4.21388	6.89376	0.00864969	0.0187738	0.919481	4.21388	5.3732	0.0204484	0.0367641	0.13994	4.21388	0.132813	0.715533	0.883711
sll1574	1.42066	5.2789	14.2159	0.000162987	0.000734009	1.51808	5.2789	16.24	5.58035e-05	0.000216739	1.86503	5.2789	24.0245	9.51166e-07	4.23074e-06	0.44437	5.2789	1.51525	0.21834	0.478698
sll1575	-0.0818809	5.20197	0.0727097	0.787432	0.850845	0.336419	5.20197	1.24669	0.264185	0.358167	-0.122943	5.20197	0.156188	0.69269	0.750472	-0.0410621	5.20197	0.0173065	0.895337	0.961228
sll1577	-2.82873	13.228	46.0917	1.12845e-11	2.90801e-10	-3.87815	13.228	78.8457	6.7155e-19	3.35465e-17	-5.22227	13.228	125.669	3.63215e-29	3.4687e-27	-2.39354	13.228	34.0993	5.23703e-09	6.29801e-07
sll1578	-2.51027	13.2659	31.9029	1.62078e-08	2.10506e-07	-3.29267	13.2659	51.3682	7.65691e-13	1.36604e-11	-4.02081	13.2659	71.6019	2.633e-17	5.69957e-16	-1.51054	13.2659	12.35	0.000440975	0.00606714
sll1579	-1.61082	11.0952	13.1427	0.000288635	0.0012	-2.22123	11.0952	24.0004	9.63175e-07	5.60471e-06	-2.74204	11.0952	35.0893	3.14924e-09	2.05746e-08	-1.13123	11.0952	6.62637	0.010048	0.0662927
sll1580	-1.40156	11.0502	14.057	0.000177353	0.000792113	-2.01054	11.0502	27.8731	1.29539e-07	9.04546e-07	-2.80217	11.0502	50.8905	9.76636e-13	1.01639e-11	-1.40062	11.0502	13.993	0.000183492	0.00310312
sll1581	-0.61422	6.6188	3.28922	0.0697363	0.127857	-0.51434	6.6188	2.31554	0.128087	0.193801	-0.701657	6.6188	4.22657	0.0397959	0.0662652	-0.0874365	6.6188	0.0655049	0.797998	0.927663
sll1582	-1.45802	5.26707	12.958	0.000318564	0.00130603	-2.14578	5.26707	26.2307	3.02964e-07	1.92134e-06	-2.02233	5.26707	22.9272	1.68256e-06	7.07678e-06	-0.564306	5.26707	1.80691	0.17888	0.427704
sll1583	-1.40659	7.41373	19.1645	1.19925e-05	7.44543e-05	-1.70424	7.41373	27.5879	1.50117e-07	1.03488e-06	-1.89474	7.41373	33.3017	7.89148e-09	4.79843e-08	-0.48815	7.41373	2.3051	0.12895	0.357659
sll1584	-1.056	3.23385	7.49765	0.00617796	0.0169999	-1.02424	3.23385	7.07995	0.00779514	0.0171061	-1.53127	3.23385	13.0425	0.000304504	0.000840039	-0.475268	3.23385	1.10526	0.293115	0.565505
sll1586	0.333348	7.46744	1.92628	0.165166	0.25453	0.222298	7.46744	0.855	0.355142	0.45328	0.192967	7.46744	0.63647	0.424992	0.504367	-0.140381	7.46744	0.338525	0.560682	0.78982
sll1590	0.713023	5.29194	4.51117	0.0336743	0.0705819	0.679489	5.29194	4.08801	0.0431886	0.0761723	0.519369	5.29194	2.30891	0.128634	0.184404	-0.193654	5.29194	0.332091	0.56443	0.792011
sll1592	0.903516	3.70005	5.05172	0.0246015	0.0548103	0.69633	3.70005	2.93252	0.086812	0.13989	0.456754	3.70005	1.16038	0.281387	0.356343	-0.446763	3.70005	1.20126	0.273069	0.546981
sll1594	-0.810949	3.04908	3.0217	0.0821571	0.145614	-1.31157	3.04908	7.41205	0.00647883	0.0145987	-1.04082	3.04908	4.39358	0.0360746	0.0608489	-0.229871	3.04908	0.199952	0.65476	0.852923
sll1595	-0.632006	4.68644	4.31688	0.037736	0.0767244	-1.18997	4.68644	14.3838	0.000149077	0.000523301	-1.23626	4.68644	14.5026	0.000139965	0.000416943	-0.60425	4.68644	3.34629	0.0673568	0.244366
sll1596	-0.739764	4.2073	6.89616	0.0086381	0.0226925	-1.90362	4.2073	37.6398	8.50902e-10	8.66106e-09	-1.00507	4.2073	11.205	0.000815767	0.0020454	-0.265306	4.2073	0.725522	0.394339	0.669324
sll1601	0.756181	5.24512	6.26748	0.0122974	0.0307862	0.552063	5.24512	3.31057	0.0688356	0.114915	0.779495	5.24512	6.4494	0.011099	0.0214259	0.0233138	5.24512	0.00604348	0.938035	0.979987
sll1605	-1.53846	3.99295	24.1262	9.02226e-07	7.77063e-06	-1.45648	3.99295	21.7335	3.13271e-06	1.60187e-05	-1.65615	3.99295	24.7174	6.6383e-07	3.02308e-06	-0.117692	3.99295	0.105711	0.745081	0.898692
sll1606	-1.35842	3.09123	11.6551	0.00064027	0.00241458	-1.79072	3.09123	18.769	1.47548e-05	6.56288e-05	-2.25371	3.09123	23.908	1.0105e-06	4.45799e-06	-0.895292	3.09123	3.22086	0.0727055	0.256046
sll1608	0.21502	6.30291	0.709232	0.399699	0.514193	0.0680388	6.30291	0.0705378	0.790555	0.842999	0.024237	6.30291	0.0087291	0.925562	0.940332	-0.190783	6.30291	0.543066	0.461165	0.721584
sll1609	0.809004	7.91171	5.92434	0.0149331	0.0364571	1.06178	7.91171	10.1271	0.00146106	0.00392722	1.41073	7.91171	17.5943	2.734e-05	9.33469e-05	0.601731	7.91171	3.31574	0.0686196	0.247982
sll1611	-1.96008	3.01741	25.0628	5.54926e-07	5.01907e-06	-2.24835	3.01741	30.7886	2.87727e-08	2.2676e-07	-1.85791	3.01741	20.0343	7.60657e-06	2.85532e-05	0.102173	3.01741	0.0453547	0.831353	0.941872
sll1612	-0.864902	3.93263	7.59217	0.00586224	0.0162551	-0.0276907	3.93263	0.00885628	0.925024	0.946341	0.225154	3.93263	0.555983	0.455883	0.5317	1.09006	3.93263	11.3321	0.000761786	0.0091833
sll1613	-0.010586	3.31824	0.000684071	0.979134	0.985813	0.101646	3.31824	0.0631678	0.801557	0.85082	-0.195304	3.31824	0.206735	0.649339	0.71278	-0.184718	3.31824	0.1832	0.668638	0.858469
sll1614	-1.2771	3.40349	15.5925	7.85663e-05	0.000388879	-1.12726	3.40349	12.426	0.0004234	0.00130524	-1.71309	3.40349	22.2452	2.3996e-06	9.8877e-06	-0.435989	3.40349	1.1766	0.27805	0.55017
sll1615	0.553967	2.58382	1.35329	0.244704	0.352665	-0.06971	2.58382	0.0196577	0.888497	0.921567	-0.122446	2.58382	0.0542394	0.815844	0.854107	-0.676413	2.58382	1.76842	0.183577	0.434141
sll1618	-0.403936	4.53557	1.04335	0.307044	0.421552	-0.906624	4.53557	5.06603	0.0243992	0.0467951	-0.75244	4.53557	3.39289	0.0654782	0.102208	-0.348504	4.53557	0.717375	0.397006	0.671745
sll1620	-0.921336	5.05455	8.78892	0.00303065	0.0093275	-1.25214	5.05455	15.648	7.62947e-05	0.000286392	-1.17338	5.05455	13.2057	0.000279099	0.000777884	-0.252046	5.05455	0.58862	0.442953	0.707113
sll1621	-0.727301	9.30597	5.02607	0.0249686	0.0553399	-0.779323	9.30597	5.75972	0.0163976	0.0330703	0.0201165	9.30597	0.00388536	0.950298	0.95916	0.747417	9.30597	5.29432	0.021395	0.114536
sll1623	-0.608463	3.65417	1.49604	0.221282	0.324673	-0.540733	3.65417	1.1925	0.274826	0.370817	-0.477524	3.65417	0.886859	0.34633	0.424673	0.130939	3.65417	0.0643862	0.799693	0.927884
sll1624	1.17553	6.32856	15.9424	6.5298e-05	0.000332324	1.1322	6.32856	14.7682	0.00012157	0.000436655	1.21707	6.32856	16.7826	4.19149e-05	0.000139159	0.0415364	6.32856	0.0207015	0.885595	0.958661
sll1625	0.144105	5.71405	0.322008	0.570403	0.672512	-0.125025	5.71405	0.238396	0.625367	0.705793	0.262804	5.71405	1.03926	0.307994	0.385527	0.118699	5.71405	0.212919	0.644489	0.84586
sll1626	0.991773	11.3439	9.97719	0.00158492	0.00534951	1.30904	11.3439	17.1476	3.45851e-05	0.000140781	1.60119	11.3439	25.2588	5.01306e-07	2.33535e-06	0.609421	11.3439	3.81554	0.0507791	0.208973
sll1628	-1.21553	4.98016	15.0126	0.000106794	0.000510693	-0.698226	4.98016	5.21331	0.0224146	0.0433733	-0.69891	4.98016	4.99067	0.0254843	0.04468	0.516623	4.98016	2.53096	0.111632	0.326983
sll1629	-1.48156	2.50993	8.94177	0.00278722	0.00869367	-1.91164	2.50993	13.6707	0.000217827	0.00072991	-2.78806	2.50993	21.1848	4.1706e-06	1.63353e-05	-1.30649	2.50993	3.89225	0.0485094	0.202961
sll1630	0.64727	3.3631	2.38357	0.122617	0.200776	1.34427	3.3631	10.998	0.000912086	0.00257302	1.0356	3.3631	5.96184	0.0146188	0.0273428	0.388326	3.3631	0.912569	0.339434	0.614349
sll1631	0.692934	3.11128	3.82074	0.0506219	0.0981309	0.982683	3.11128	8.09052	0.00444974	0.0104945	0.548478	3.11128	2.0445	0.152757	0.213059	-0.144456	3.11128	0.160532	0.688667	0.869256
sll1632	1.01403	6.52076	12.7554	0.000354979	0.00143004	1.08872	6.52076	14.6894	0.000126759	0.000452293	0.646056	6.52076	5.08614	0.0241178	0.0425139	-0.367976	6.52076	1.70165	0.192072	0.443255
sll1633	-0.447338	7.72083	3.1124	0.0776984	0.139308	-0.596924	7.72083	5.50622	0.0189489	0.0374253	-0.807035	7.72083	9.86991	0.00168004	0.00393017	-0.359697	7.72083	1.96618	0.160854	0.403316
sll1634	0.651038	2.56227	2.60699	0.106394	0.179834	-0.834411	2.56227	3.25683	0.0711266	0.118193	-0.800299	2.56227	2.61689	0.105731	0.15605	-1.45134	2.56227	9.43364	0.00213041	0.019935
sll1635	-1.53898	2.31872	8.30861	0.00394575	0.0115665	-2.39175	2.31872	17.3277	3.14568e-05	0.000129239	-3.02761	2.31872	20.6095	5.63174e-06	2.16405e-05	-1.48863	2.31872	4.15043	0.0416239	0.186161
sll1636	-0.735332	2.95271	2.96091	0.0853	0.149977	-0.683132	2.95271	2.55993	0.109603	0.170559	-0.420417	2.95271	0.922949	0.336702	0.413961	0.314915	2.95271	0.46732	0.494223	0.741563
sll1638	-2.32402	8.05073	77.452	1.35989e-18	1.6983e-16	-2.90454	8.05073	114.608	9.58838e-27	1.48255e-24	-3.33414	8.05073	142.384	8.01494e-33	1.30123e-30	-1.01012	8.05073	14.6112	0.00013213	0.00246699
sll1639	-1.37148	6.03075	5.34559	0.0207748	0.0476383	-1.8316	6.03075	9.27083	0.00232832	0.00597162	-2.28744	6.03075	13.8355	0.000199534	0.000572843	-0.915962	6.03075	2.36009	0.124475	0.349774
sll1640	-0.684757	2.76113	2.15433	0.142168	0.2254	-0.82331	2.76113	3.08021	0.0792505	0.129245	-1.6078	2.76113	9.017	0.0026748	0.00599797	-0.923044	2.76113	2.74628	0.0974812	0.304348
sll1641	-0.0620792	6.48148	0.0611857	0.804632	0.862542	-0.343904	6.48148	1.85394	0.173326	0.250814	-0.518313	6.48148	4.06458	0.0437915	0.0717412	-0.456233	6.48148	3.14054	0.0763685	0.262958
sll1642	2.27096	4.06397	24.5381	7.28553e-07	6.44581e-06	1.85685	4.06397	16.1304	5.91258e-05	0.000228278	2.198	4.06397	22.2259	2.42388e-06	9.97506e-06	-0.0729628	4.06397	0.0305594	0.861227	0.950552
sll1643	0.852331	6.15606	7.65272	0.00566867	0.0158034	1.18275	6.15606	14.691	0.000126648	0.000452293	0.912283	6.15606	8.59589	0.00336922	0.00735206	0.0599517	6.15606	0.038588	0.844267	0.945188
sll1647	-0.617899	3.39567	2.6994	0.100386	0.171284	-1.09148	3.39567	7.81608	0.00517833	0.0119333	-1.56035	3.39567	13.2799	0.000268267	0.000750915	-0.942453	3.39567	4.55616	0.0328005	0.160397
sll1652	1.50238	8.95169	14.2981	0.000156019	0.000709514	1.56918	8.95169	15.54	8.07784e-05	0.000301134	1.47973	8.95169	13.8687	0.000196035	0.000564297	-0.0226524	8.95169	0.0034001	0.953501	0.985335
sll1653	1.20828	5.95059	12.809	0.000344959	0.00139487	1.58792	5.95059	21.9541	2.79251e-06	1.44614e-05	1.20712	5.95059	12.5447	0.000397324	0.00107152	-0.00116073	5.95059	1.23755e-05	0.997193	0.998423
sll1654	0.507454	7.59136	2.07394	0.149834	0.234902	0.936825	7.59136	7.01025	0.00810446	0.0176968	0.881245	7.59136	6.18964	0.01285	0.024343	0.373791	7.59136	1.13094	0.287575	0.559135
sll1655	1.54194	8.66663	15.8664	6.79757e-05	0.000343796	2.09964	8.66663	28.4802	9.46599e-08	6.77006e-07	2.31609	8.66663	34.1074	5.21514e-09	3.24397e-08	0.774151	8.66663	4.1659	0.0412454	0.184722
sll1656	1.26764	8.53463	22.7	1.89371e-06	1.47809e-05	1.771	8.53463	43.3423	4.59541e-11	5.96852e-10	2.12504	8.53463	60.996	5.71897e-15	8.40249e-14	0.857404	8.53463	10.718	0.00106096	0.0119724
sll1658	0.556358	3.58573	1.63176	0.20146	0.299927	1.02571	3.58573	5.75001	0.0164886	0.0332124	1.06443	3.58573	5.96585	0.0145856	0.0272965	0.50807	3.58573	1.43625	0.230746	0.496181
sll1659	0.320973	5.72534	1.14852	0.28386	0.396522	0.501493	5.72534	2.81635	0.0933084	0.148525	0.643239	5.72534	4.54251	0.0330631	0.0563253	0.322267	5.72534	1.15833	0.281812	0.554573
sll1660	0.285176	4.15354	0.995136	0.31849	0.433783	-0.0765869	4.15354	0.0684578	0.793596	0.845408	0.235093	4.15354	0.616488	0.432355	0.510709	-0.0500823	4.15354	0.0287387	0.865384	0.951855
sll1662	0.955528	7.07425	12.6657	0.000372429	0.00149293	1.24149	7.07425	21.2737	3.98163e-06	1.98898e-05	1.78673	7.07425	43.0469	5.34446e-11	4.50739e-10	0.831201	7.07425	9.90054	0.0016523	0.0167274
sll1663	-0.727929	5.76753	4.41603	0.0356028	0.0733053	-0.927361	5.76753	7.08357	0.00777937	0.0170904	-1.14421	5.76753	10.4101	0.0012533	0.00302562	-0.416283	5.76753	1.37437	0.241063	0.505986
sll1664	-1.25657	4.43906	20.7753	5.1646e-06	3.58322e-05	-1.12104	4.43906	16.7969	4.16003e-05	0.00016635	-1.41123	4.43906	23.168	1.4845e-06	6.31739e-06	-0.154663	4.43906	0.245634	0.620166	0.830041
sll1665	-1.11176	9.36932	16.822	4.10541e-05	0.000219248	-1.39825	9.36932	26.2199	3.04667e-07	1.92837e-06	-1.69547	9.36932	37.7324	8.11451e-10	5.82917e-09	-0.583706	9.36932	4.66287	0.0308216	0.153258
sll1666	0.44908	5.21047	2.60155	0.106759	0.180357	0.394419	5.21047	2.00052	0.157245	0.23082	0.851007	5.21047	9.17266	0.00245658	0.00556989	0.401926	5.21047	2.11494	0.145868	0.382889
sll1667	-1.31116	3.3667	8.76463	0.00307129	0.00940096	-0.812355	3.3667	3.5778	0.0585567	0.0998077	-1.29929	3.3667	7.87516	0.00501184	0.0105262	0.0118653	3.3667	0.000576246	0.980849	0.992227
sll1669	-1.02796	3.35166	8.1682	0.00426313	0.0123372	-1.08224	3.35166	8.93974	0.00279033	0.00700711	-1.24541	3.35166	10.3366	0.0013042	0.00313213	-0.217451	3.35166	0.275386	0.599741	0.815136
sll1670	-1.00113	4.21136	11.506	0.000693712	0.00260102	-0.635986	4.21136	4.86817	0.0273565	0.051434	-0.739955	4.21136	5.95952	0.014638	0.0273473	0.261172	4.21136	0.660781	0.416284	0.690688
sll1671	-0.382794	2.12243	0.433292	0.510378	0.620521	-0.0614523	2.12243	0.0117402	0.913716	0.938397	0.505211	2.12243	0.789792	0.374163	0.453324	0.888005	2.12243	2.27341	0.13161	0.361844
sll1672	0.0988409	6.74952	0.100482	0.751252	0.823259	-0.185966	6.74952	0.352655	0.552614	0.644749	0.0350177	6.74952	0.0124241	0.911249	0.929366	-0.0638232	6.74952	0.0413119	0.838937	0.943851
sll1673	0.899258	6.85093	5.37261	0.0204554	0.047072	0.49991	6.85093	1.66853	0.196455	0.279164	0.316511	6.85093	0.66378	0.415229	0.495679	-0.582746	6.85093	2.25932	0.132813	0.363611
sll1675	-0.788034	3.04669	2.54453	0.110677	0.186008	-0.482193	3.04669	0.982271	0.321639	0.419086	-0.618284	3.04669	1.48523	0.222958	0.293058	0.16975	3.04669	0.104318	0.746708	0.899235
sll1676	-0.469762	4.57537	1.71718	0.190057	0.285701	-0.721971	4.57537	3.97857	0.0460827	0.0806198	-0.939272	4.57537	6.30133	0.0120648	0.0229761	-0.46951	4.57537	1.54384	0.214047	0.474677
sll1677	-0.473344	6.28687	1.75305	0.185494	0.279911	-0.328104	6.28687	0.845882	0.35772	0.456033	-0.775535	6.28687	4.58281	0.0322942	0.0552473	-0.302191	6.28687	0.695126	0.404426	0.678993
sll1678	-1.26134	4.17696	15.5689	7.95509e-05	0.000393153	-1.33819	4.17696	17.3261	3.14838e-05	0.000129239	-1.72224	4.17696	24.7418	6.55471e-07	2.98921e-06	-0.460901	4.17696	1.60014	0.205883	0.462493
sll1679	0.636477	7.06611	5.93472	0.0148454	0.0363622	0.35821	7.06611	1.87886	0.170463	0.247427	-0.20073	7.06611	0.571617	0.449617	0.525524	-0.837206	7.06611	9.94819	0.00161008	0.01644
sll1680	-0.181365	5.50868	0.365897	0.545249	0.650413	0.152283	5.50868	0.262134	0.608658	0.690711	0.13749	5.50868	0.207432	0.648788	0.712416	0.318855	5.50868	1.10208	0.293809	0.565726
sll1681	0.972477	5.21114	12.0455	0.000519187	0.00199739	0.923296	5.21114	10.7826	0.00102458	0.00284653	1.06309	5.21114	13.836	0.000199479	0.000572843	0.0906146	5.21114	0.108571	0.741777	0.898042
sll1682	-0.422799	3.66133	1.24031	0.265412	0.376657	0.124221	3.66133	0.113809	0.735848	0.797763	0.354532	3.66133	0.896661	0.343679	0.42174	0.777331	3.66133	4.05115	0.0441413	0.192014
sll1683	-1.05299	2.88555	5.05804	0.024512	0.0547013	-1.36456	2.88555	7.97491	0.004743	0.0110716	-1.41487	2.88555	7.77517	0.00529692	0.0110605	-0.361879	2.88555	0.459102	0.498044	0.745917
sll1685	0.220941	5.16868	0.618859	0.431472	0.545981	0.150025	5.16868	0.283235	0.594588	0.678777	0.63398	5.16868	4.99445	0.0254287	0.0446067	0.413039	5.16868	2.14417	0.143113	0.379267
sll1686	-0.933189	4.50993	6.83716	0.00892805	0.0233785	-0.794197	4.50993	4.96999	0.0257907	0.0490009	-0.779871	4.50993	4.59701	0.0320278	0.0548783	0.153318	4.50993	0.168407	0.681531	0.865441
sll1687	1.79924	6.96075	37.8904	7.48333e-10	1.30636e-08	2.04466	6.96075	48.4842	3.32958e-12	5.22278e-11	2.48851	6.96075	69.9281	6.15057e-17	1.22521e-15	0.689262	6.96075	6.13192	0.0132763	0.081336
sll1688	0.298046	8.87552	1.13593	0.286514	0.399447	-0.0884983	8.87552	0.100101	0.751708	0.811975	-0.362041	8.87552	1.6609	0.197482	0.264313	-0.660087	8.87552	5.49616	0.0190583	0.106145
sll1689	-1.91118	5.01587	51.9533	5.68365e-13	1.96328e-11	-2.52177	5.01587	82.452	1.08265e-19	6.16732e-18	-3.03351	5.01587	99.7815	1.70172e-23	7.89357e-22	-1.12233	5.01587	12.2236	0.000471883	0.00633142
sll1691	1.46536	3.45149	7.05413	0.00790828	0.0210132	1.86265	3.45149	11.5465	0.00067878	0.00198023	1.92214	3.45149	11.9775	0.000538471	0.00141343	0.456774	3.45149	0.782051	0.376514	0.656002
sll1692	0.806189	4.84443	6.7168	0.0095509	0.0246712	0.863855	4.84443	7.71247	0.00548407	0.0125577	0.90578	4.84443	8.17654	0.00424356	0.00901756	0.0995907	4.84443	0.105471	0.74536	0.898695
sll1693	0.687698	6.53286	3.20792	0.0732827	0.132562	1.16223	6.53286	9.07499	0.0025913	0.00656505	1.64927	6.53286	17.8613	2.37599e-05	8.20727e-05	0.961569	6.53286	6.32123	0.0119301	0.0752173
sll1694	1.42151	13.7231	19.2811	1.12818e-05	7.05817e-05	1.70108	13.7231	27.1803	1.85341e-07	1.25115e-06	2.32461	13.7231	48.6478	3.06304e-12	2.98669e-11	0.903103	13.7231	7.9635	0.00477301	0.0371654
sll1695	1.32827	8.82479	14.1829	0.00016587	0.000744924	1.59113	8.82479	20.0993	7.35251e-06	3.48012e-05	2.52564	8.82479	47.6287	5.15085e-12	4.89029e-11	1.19737	8.82479	11.6956	0.000626472	0.007915
sll1696	1.30841	8.10089	11.3705	0.000746217	0.00277227	0.883119	8.10089	5.25536	0.0218793	0.0424894	1.32609	8.10089	11.6363	0.000646777	0.00166015	0.0176796	8.10089	0.00215046	0.963013	0.987448
sll1697	0.246778	6.49537	0.531383	0.466026	0.579802	0.498928	6.49537	2.17093	0.140641	0.20967	0.73885	6.49537	4.70622	0.0300537	0.0517964	0.492072	6.49537	2.10563	0.146758	0.384591
sll1699	-1.39626	3.87136	19.6805	9.15291e-06	5.87342e-05	-1.7844	3.87136	30.2154	3.86618e-08	2.95376e-07	-2.3278	3.87136	41.447	1.21108e-10	9.80643e-10	-0.931537	3.87136	5.73407	0.0166389	0.095622
sll1702	-1.00441	4.1073	9.40642	0.00216226	0.0069929	-0.870926	4.1073	7.16372	0.00743929	0.0164546	-0.939395	4.1073	7.65263	0.00566896	0.0117617	0.0650179	4.1073	0.0333876	0.855015	0.948168
sll1703	-0.312751	3.1446	0.512074	0.474243	0.588075	-0.277268	3.1446	0.400701	0.526728	0.622828	-0.900589	3.1446	3.55722	0.059287	0.0937677	-0.587839	3.1446	1.46259	0.226518	0.490664
sll1704	0.260691	3.0728	0.384488	0.535211	0.641739	-0.514484	3.0728	1.33975	0.247078	0.338937	-0.339417	3.0728	0.550403	0.458153	0.533581	-0.600108	3.0728	1.75736	0.184954	0.435438
sll1708	0.429057	5.27591	2.03068	0.154152	0.239374	0.59996	5.27591	3.98669	0.045861	0.0803186	0.618707	5.27591	4.09828	0.0429269	0.070574	0.18965	5.27591	0.394324	0.530035	0.771414
sll1709	-0.279003	4.1326	0.48215	0.48745	0.601349	0.0743767	4.1326	0.035239	0.851096	0.891454	-0.931124	4.1326	4.72733	0.029687	0.0511915	-0.652121	4.1326	2.27571	0.131415	0.361614
sll1710	0.96758	2.7227	2.85903	0.090862	0.157478	0.381742	2.7227	0.422575	0.515655	0.612411	0.104352	2.7227	0.0291259	0.864489	0.892318	-0.863227	2.7227	2.13017	0.144425	0.381169
sll1712	0.260811	10.8343	0.796384	0.372177	0.487731	0.226267	10.8343	0.599529	0.438758	0.53948	0.236293	10.8343	0.653334	0.418923	0.499172	-0.0245181	10.8343	0.00704311	0.933117	0.977996
sll1713	-0.426535	6.3298	1.50806	0.219435	0.3224	-0.771624	6.3298	4.87389	0.0272659	0.0512934	-1.33034	6.3298	13.7363	0.000210353	0.000600718	-0.903806	6.3298	6.38393	0.0115158	0.0730311
sll1714	0.0390891	3.81359	0.00391041	0.950138	0.9653	0.448473	3.81359	0.515742	0.472664	0.571172	0.746209	3.81359	1.40816	0.235362	0.306546	0.70712	3.81359	1.26558	0.260597	0.532511
sll1715	0.438039	2.93247	0.612544	0.433831	0.548073	0.295331	2.93247	0.276802	0.598805	0.682217	0.603433	2.93247	1.10944	0.292203	0.368751	0.165393	2.93247	0.0862726	0.76897	0.909968
sll1716	-0.0663394	2.43185	0.0212582	0.884078	0.923023	-0.547491	2.43185	1.33246	0.248367	0.3397	-0.508789	2.43185	1.02577	0.311155	0.389184	-0.44245	2.43185	0.761502	0.382859	0.660633
sll1717	-0.68369	5.40369	4.80707	0.0283432	0.0609876	-1.37403	5.40369	18.3683	1.82062e-05	7.94551e-05	-1.42735	5.40369	18.8466	1.41666e-05	5.07156e-05	-0.743664	5.40369	5.07058	0.0243352	0.125423
sll1721	-1.49381	4.94316	22.04	2.67031e-06	2.00243e-05	-1.58138	4.94316	24.3869	7.88014e-07	4.69483e-06	-1.38853	4.94316	18.1892	2.00009e-05	6.97561e-05	0.105281	4.94316	0.0978016	0.754484	0.90166
sll1722	-3.24953	5.96836	38.196	6.39841e-10	1.13528e-08	-3.38899	5.96836	40.8413	1.65111e-10	1.88773e-09	-4.26301	5.96836	57.2664	3.80593e-14	4.82728e-13	-1.01348	5.96836	3.70891	0.0541226	0.218035
sll1723	-0.473051	2.21945	0.757973	0.383963	0.49879	-1.4476	2.21945	6.05384	0.0138761	0.0285342	-2.10421	2.21945	9.9695	0.00159155	0.00374747	-1.63116	2.21945	5.65531	0.0174026	0.099134
sll1724	0.754659	2.72319	3.2502	0.0714146	0.129907	-0.0313233	2.72319	0.00496421	0.94383	0.959556	0.405205	2.72319	0.792667	0.373295	0.452779	-0.349454	2.72319	0.655378	0.418196	0.692798
sll1725	0.0140065	3.93615	0.00153979	0.968699	0.978645	-0.511067	3.93615	1.94427	0.163206	0.238725	-0.481129	3.93615	1.60042	0.205844	0.273812	-0.495136	3.93615	1.68801	0.193864	0.445174
sll1726	0.338055	2.1474	0.375149	0.540211	0.646065	0.314991	2.1474	0.323737	0.569371	0.658385	-0.311224	2.1474	0.252641	0.615221	0.682016	-0.649279	2.1474	1.13473	0.286769	0.558856
sll1730	0.415036	6.00479	2.33042	0.126867	0.206321	0.379126	6.00479	1.93759	0.163931	0.239444	0.0321773	6.00479	0.0133998	0.907845	0.927748	-0.382859	6.00479	1.91751	0.166132	0.410837
sll1732	-0.320969	5.91485	1.14245	0.285135	0.397866	-1.0866	5.91485	12.4957	0.000407891	0.00126376	-1.29351	5.91485	16.8585	4.02733e-05	0.00013412	-0.972545	5.91485	9.52065	0.00203173	0.0194603
sll1733	-0.11849	4.84351	0.155401	0.693427	0.778923	-0.471418	4.84351	2.38357	0.122617	0.187271	-0.744508	4.84351	5.46616	0.0193881	0.035052	-0.626018	4.84351	3.83171	0.0502917	0.207558
sll1734	-1.04415	5.05658	9.94502	0.00161285	0.00542686	-1.38365	5.05658	16.8971	3.94612e-05	0.000158774	-1.45616	5.05658	17.6429	2.66508e-05	9.10896e-05	-0.412006	5.05658	1.37563	0.240846	0.505986
sll1735	-1.2698	3.36195	9.20001	0.00242014	0.00768904	-1.16877	3.36195	7.85662	0.00506349	0.0117353	-1.87753	3.36195	16.5984	4.61899e-05	0.000152263	-0.607731	3.36195	1.55685	0.212127	0.471764
sll1736	0.555918	5.24914	3.37922	0.0660231	0.122292	0.84333	5.24914	7.83754	0.00511721	0.011826	1.04978	5.24914	11.8738	0.000569277	0.00147757	0.493858	5.24914	2.73011	0.0984724	0.306558
sll1737	-0.150162	7.10477	0.119879	0.729166	0.806404	-0.0431172	7.10477	0.0098831	0.92081	0.943176	0.187756	7.10477	0.186743	0.665641	0.725768	0.337917	7.10477	0.603103	0.437396	0.703397
sll1738	-1.30639	4.42896	15.1548	9.90437e-05	0.000479277	-0.750544	4.42896	5.29838	0.0213452	0.0416764	-1.4256	4.42896	16.6574	4.47752e-05	0.000147983	-0.119209	4.42896	0.106388	0.744294	0.898223
sll1739	0.143529	7.38069	0.256357	0.612634	0.709031	0.150514	7.38069	0.281505	0.595716	0.679653	0.224496	7.38069	0.621269	0.430576	0.509133	0.0809673	7.38069	0.0809864	0.775965	0.91421
sll1740	-1.81296	6.01353	28.7783	8.11564e-08	9.05549e-07	-2.5681	6.01353	53.7031	2.3319e-13	4.61688e-12	-2.98062	6.01353	66.8148	2.98252e-16	5.12393e-15	-1.16766	6.01353	10.7271	0.0010558	0.0119724
sll1742	-0.157859	6.79449	0.37428	0.54068	0.646388	-0.563094	6.79449	4.6842	0.0304412	0.0563205	-0.9237	6.79449	12.0737	0.000511381	0.00134777	-0.765841	6.79449	8.29337	0.00397901	0.0322996
sll1743	-0.409631	7.23783	1.75673	0.185032	0.279572	-0.880899	7.23783	7.98549	0.00471537	0.011015	-1.57091	7.23783	24.0277	9.49574e-07	4.22945e-06	-1.16128	7.23783	13.3009	0.00026528	0.00418137
sll1744	-0.699516	9.51121	5.1623	0.0230823	0.0520112	-1.05017	9.51121	11.4886	0.000700229	0.00203732	-1.70799	9.51121	29.2541	6.34815e-08	3.424e-07	-1.00848	9.51121	10.5345	0.00117166	0.0129395
sll1745	-0.30038	10.1902	0.59061	0.442183	0.556715	-0.739013	10.1902	3.54157	0.0598489	0.10153	-1.46362	10.1902	13.455	0.000244357	0.00068874	-1.16324	10.1902	8.62057	0.00332388	0.028253
sll1746	-0.395374	10.6799	0.840993	0.359113	0.473737	-0.767749	10.6799	3.14364	0.0762235	0.124946	-1.35388	10.6799	9.53932	0.00201117	0.0046281	-0.95851	10.6799	4.86295	0.0274393	0.138132
sll1747	-1.24304	4.61017	15.1681	9.83534e-05	0.000476647	-0.64467	4.61017	4.33754	0.0372807	0.0674376	-0.738031	4.61017	5.33726	0.0208742	0.0374882	0.505008	4.61017	2.2648	0.132343	0.362632
sll1749	-0.671071	4.37944	5.89183	0.0152113	0.0370248	-0.742658	4.37944	7.11588	0.00764039	0.0168078	-0.811697	4.37944	7.7087	0.00549552	0.0114458	-0.140627	4.37944	0.215392	0.642574	0.844711
sll1750	0.276105	6.76625	0.888333	0.345929	0.459588	0.111915	6.76625	0.145546	0.702829	0.772018	-0.19262	6.76625	0.421072	0.516402	0.5902	-0.468725	6.76625	2.49691	0.11407	0.331589
sll1751	-0.970797	4.28756	8.48603	0.00357884	0.0106904	-1.4711	4.28756	18.1767	2.0133e-05	8.64706e-05	-0.900117	4.28756	6.86092	0.00881011	0.0174536	0.07068	4.28756	0.0394321	0.842595	0.944067
sll1752	-0.288895	6.49803	0.76528	0.381681	0.49712	-0.387577	6.49803	1.37288	0.241318	0.332017	-0.773705	6.49803	5.2859	0.0214988	0.0384655	-0.48481	6.49803	2.07532	0.149698	0.387973
sll1755	-0.488473	4.43902	1.92107	0.165738	0.255048	-0.284333	4.43902	0.656974	0.41763	0.518213	-0.555072	4.43902	2.32241	0.127523	0.183377	-0.0665992	4.43902	0.0323694	0.857219	0.949601
sll1757	-1.38547	5.55439	26.6708	2.41241e-07	2.38088e-06	-1.0846	5.55439	16.8191	4.11173e-05	0.000164825	-1.26472	5.55439	21.4278	3.67402e-06	1.45838e-05	0.120749	5.55439	0.184179	0.667806	0.858022
sll1758	0.624118	7.43783	5.4877	0.0191507	0.0445113	0.695978	7.43783	6.8161	0.00903398	0.0194647	0.649521	7.43783	5.88029	0.0153113	0.0284579	0.025403	7.43783	0.00914352	0.923821	0.972964
sll1760	-0.69663	6.03134	6.14754	0.0131595	0.0327174	-1.2051	6.03134	17.7477	2.52219e-05	0.00010622	-1.70977	6.03134	32.9814	9.30438e-09	5.62594e-08	-1.01314	6.03134	11.5985	0.000660053	0.00827487
sll1761	0.32058	2.09286	0.433421	0.510315	0.620521	0.417979	2.09286	0.752708	0.38562	0.484187	-0.101998	2.09286	0.0343331	0.853	0.884038	-0.422578	2.09286	0.619846	0.431105	0.699549
sll1762	-1.42663	5.77798	18.1547	2.03662e-05	0.000116016	-1.18709	5.77798	12.7849	0.000349435	0.00110157	-1.08858	5.77798	10.5838	0.00114085	0.00277478	0.338051	5.77798	0.99176	0.319313	0.593306
sll1763	0.620723	5.98865	3.67518	0.0552282	0.105424	1.10531	5.98865	11.6671	0.000636141	0.00187607	1.88928	5.98865	33.2727	8.00978e-09	4.86126e-08	1.26856	5.98865	15.749	7.23272e-05	0.00153595
sll1764	0.175425	4.86817	0.417999	0.517937	0.626114	0.671467	4.86817	6.43744	0.0111739	0.023529	1.42584	4.86817	29.3445	6.05883e-08	3.28431e-07	1.25041	4.86817	22.913	1.69497e-06	8.0935e-05
sll1765	-0.0178347	5.20319	0.00459754	0.945941	0.964052	0.0183235	5.20319	0.00483159	0.944584	0.959957	0.430439	5.20319	2.64002	0.104202	0.154143	0.448274	5.20319	2.84602	0.0916006	0.293321
sll1766	-0.278105	5.14491	1.04494	0.306675	0.421452	-0.0864901	5.14491	0.10215	0.749264	0.809874	0.225876	5.14491	0.68431	0.408107	0.488975	0.503981	5.14491	3.31472	0.068662	0.247982
sll1767	-1.57491	7.01361	32.56	1.1557e-08	1.57011e-07	-1.97389	7.01361	49.4653	2.01913e-12	3.31116e-11	-2.10047	7.01361	54.3156	1.70737e-13	1.9729e-12	-0.525552	7.01361	3.51563	0.0607927	0.230054
sll1768	0.485783	5.05585	2.99544	0.0834994	0.147751	0.762387	5.05585	7.49587	0.00618407	0.0140026	1.16695	5.05585	17.2989	3.1938e-05	0.000107575	0.681168	5.05585	6.15016	0.01314	0.0808063
sll1769	1.21821	6.40167	14.4016	0.000147676	0.000676308	1.47973	6.40167	21.1037	4.35095e-06	2.16348e-05	1.65828	6.40167	26.1011	3.24e-07	1.582e-06	0.440069	6.40167	1.97486	0.159933	0.403272
sll1770	0.109746	5.59898	0.127478	0.721061	0.799406	0.555029	5.59898	3.30444	0.0690928	0.115168	0.727005	5.59898	5.54712	0.0185111	0.033635	0.617258	5.59898	4.01427	0.0451168	0.195325
sll1771	0.0526597	5.72352	0.0204881	0.886182	0.924625	0.161227	5.72352	0.192448	0.660887	0.738184	0.754771	5.72352	4.17445	0.0410379	0.0679848	0.702111	5.72352	3.61289	0.0573335	0.225043
sll1772	-0.691819	3.40719	3.21589	0.0729263	0.132212	-0.847059	3.40719	4.72509	0.0297256	0.0551852	-1.51859	3.40719	12.2958	0.000453971	0.00121022	-0.826767	3.40719	3.40906	0.0648395	0.23843
sll1773	0.888494	5.13875	7.2521	0.00708181	0.0191144	1.20931	5.13875	13.5269	0.000235172	0.0007776	1.14751	5.13875	11.8312	0.000582472	0.0015082	0.259018	5.13875	0.643451	0.422464	0.697238
sll1774	2.10841	7.11156	45.741	1.3497e-11	3.39727e-10	2.00366	7.11156	41.4573	1.20476e-10	1.42769e-09	2.45816	7.11156	60.7317	6.54068e-15	9.48107e-14	0.349749	7.11156	1.40883	0.235251	0.50188
sll1775	0.802416	6.70931	6.36234	0.0116567	0.029409	0.741251	6.70931	5.43149	0.0197768	0.0388948	0.465364	6.70931	2.11159	0.146187	0.206199	-0.337052	6.70931	1.12527	0.288787	0.560485
sll1776	-0.239933	3.63967	0.48876	0.484481	0.598596	0.0254314	3.63967	0.00572242	0.9397	0.957412	-0.510529	3.63967	1.91548	0.166356	0.228783	-0.270597	3.63967	0.519309	0.471136	0.727774
sll1783	-1.15166	5.66301	17.3715	3.07398e-05	0.000168602	-1.67393	5.66301	34.8609	3.54124e-09	3.22989e-08	-1.82071	5.66301	38.9283	4.39654e-10	3.30453e-09	-0.669049	5.66301	5.17389	0.0229288	0.120414
sll1784	-0.581946	6.4462	4.47451	0.0344041	0.071701	-1.00432	6.4462	13.0051	0.000310648	0.000987926	-1.29316	6.4462	20.5908	5.68691e-06	2.18267e-05	-0.711216	6.4462	6.24149	0.0124791	0.077624
sll1785	0.0672978	7.39225	0.0463702	0.829504	0.879621	-0.561459	7.39225	3.18721	0.0742164	0.122325	-1.05945	7.39225	10.9667	0.00092763	0.002301	-1.12675	7.39225	12.3703	0.000436223	0.0060273
sll1786	-0.022321	7.08047	0.00798359	0.928803	0.952265	-0.204658	7.08047	0.667307	0.413992	0.514637	-0.235757	7.08047	0.869359	0.351133	0.42975	-0.213436	7.08047	0.711424	0.398971	0.674202
sll1787	0.228137	8.88111	0.671391	0.412567	0.526574	-0.0704517	8.88111	0.0639898	0.800298	0.850038	-0.430157	8.88111	2.36128	0.12438	0.179414	-0.658294	8.88111	5.50848	0.0189244	0.10558
sll1789	0.341185	9.68219	1.6391	0.200449	0.298695	-0.193637	9.68219	0.52788	0.4675	0.567056	-0.639621	9.68219	5.69026	0.0170593	0.0313301	-0.980807	9.68219	13.2507	0.000272477	0.00423317
sll1791	2.19056	4.5625	24.1297	9.00599e-07	7.77063e-06	2.51464	4.5625	31.9471	1.58428e-08	1.28926e-07	3.04221	4.5625	45.7092	1.37176e-11	1.25116e-10	0.851645	4.5625	4.5637	0.0326564	0.160174
sll1792	1.17513	4.00331	9.48357	0.0020732	0.00675863	1.14061	4.00331	8.92144	0.00281842	0.00706126	0.99907	4.00331	6.36643	0.01163	0.022286	-0.176058	4.00331	0.221086	0.638213	0.841759
sll1796	-3.1619	4.9049	36.1269	1.8488e-09	3.00153e-08	-3.94084	4.9049	51.0253	9.11818e-13	1.59176e-11	-4.16186	4.9049	52.8599	3.58201e-13	3.91609e-12	-0.999965	4.9049	3.17739	0.0746641	0.259844
sll1797	0.0318352	2.17664	0.00213625	0.963135	0.97454	-0.0409376	2.17664	0.00344847	0.953172	0.965663	0.136588	2.17664	0.036962	0.847542	0.879505	0.104753	2.17664	0.0216495	0.883023	0.957576
sll1799	-1.3428	6.43666	9.46616	0.00209298	0.00679441	-2.47673	6.43666	29.5716	5.38875e-08	4.00395e-07	-1.73421	6.43666	15.2476	9.42989e-05	0.000291331	-0.39141	6.43666	0.804611	0.369718	0.648205
sll1800	-0.697529	6.93898	2.95083	0.0858336	0.150406	-1.52074	6.93898	13.4634	0.000243264	0.000801905	-1.31762	6.93898	10.1579	0.00143683	0.00341287	-0.620094	6.93898	2.29109	0.130119	0.358655
sll1801	-0.327798	4.19286	0.981827	0.321748	0.437486	-1.59492	4.19286	20.0372	7.59508e-06	3.58448e-05	-0.843733	4.19286	5.73319	0.0166472	0.03066	-0.515935	4.19286	2.08989	0.148276	0.387021
sll1802	-0.85643	6.55588	4.37744	0.0364176	0.0747458	-2.27439	6.55588	28.1395	1.12881e-07	7.93341e-07	-2.17382	6.55588	25.5925	4.21686e-07	2.00471e-06	-1.31739	6.55588	9.76751	0.00177623	0.0174819
sll1803	-0.895368	4.97349	4.5148	0.0336028	0.0704833	-2.64371	4.97349	33.6825	6.48814e-09	5.7019e-08	-2.0769	4.97349	21.4212	3.6867e-06	1.46162e-05	-1.18153	4.97349	7.0286	0.00802183	0.0558946
sll1804	-0.356944	6.31919	0.975433	0.323329	0.4389	-1.98017	6.31919	27.2929	1.74851e-07	1.18526e-06	-1.68084	6.31919	19.7819	8.68018e-06	3.22477e-05	-1.3239	6.31919	12.4044	0.000428314	0.00596882
sll1805	-1.52287	4.17666	7.84836	0.00508668	0.0144375	-2.99001	4.17666	25.8854	3.62294e-07	2.27537e-06	-3.28628	4.17666	28.5076	9.33299e-08	4.88778e-07	-1.7634	4.17666	8.40475	0.00374242	0.0312382
sll1806	-0.332464	4.59051	0.651991	0.419402	0.533829	-1.55865	4.59051	13.0899	0.000296885	0.000953498	-1.69051	4.59051	14.5302	0.000137931	0.000411259	-1.35804	4.59051	9.36085	0.00221669	0.0205059
sll1807	0.275062	6.49129	0.468388	0.493729	0.606331	-1.07026	6.49129	6.84462	0.00889086	0.0191946	-1.4372	6.49129	11.8957	0.000562643	0.00146386	-1.71226	6.49129	16.682	4.41977e-05	0.0010823
sll1808	0.0454197	5.71645	0.0131153	0.908824	0.938896	-1.21564	5.71645	8.91356	0.0028306	0.00708633	-1.86998	5.71645	19.4093	1.0549e-05	3.88353e-05	-1.9154	5.71645	20.3193	6.55371e-06	0.000228816
sll1809	-0.474774	5.19156	1.15534	0.282433	0.395968	-1.10409	5.19156	6.05931	0.0138332	0.0284641	-2.1995	5.19156	21.1427	4.26326e-06	1.6658e-05	-1.72473	5.19156	13.1662	0.000285039	0.00436567
sll1810	0.0412215	6.70516	0.0104999	0.918385	0.945464	-0.301536	6.70516	0.559207	0.45458	0.554895	-1.14368	6.70516	7.69546	0.00553599	0.0115227	-1.1849	6.70516	8.24477	0.00408695	0.0329289
sll1811	-0.293599	5.04647	0.329988	0.565666	0.669114	-0.806795	5.04647	2.4501	0.117518	0.180501	-2.06696	5.04647	14.2189	0.00016273	0.000476451	-1.77337	5.04647	10.5617	0.00115454	0.0128383
sll1812	0.0321809	7.02471	0.0105649	0.918133	0.945464	-0.997814	7.02471	9.82669	0.00171998	0.004559	-1.82662	7.02471	30.532	3.28403e-08	1.85771e-07	-1.8588	7.02471	31.5497	1.94399e-08	1.97254e-06
sll1813	-0.268566	6.8506	0.791574	0.373625	0.48898	-1.39445	6.8506	20.2474	6.80465e-06	3.24922e-05	-1.8389	6.8506	33.3286	7.78281e-09	4.74124e-08	-1.57033	6.8506	24.5286	7.32139e-07	4.02925e-05
sll1814	-0.240395	9.15437	0.967136	0.325396	0.4406	-0.907588	9.15437	13.5321	0.000234519	0.000777025	-1.30152	9.15437	27.1547	1.87805e-07	9.45433e-07	-1.06112	9.15437	18.2097	1.97864e-05	0.000558666
sll1815	-0.725288	5.06018	4.21888	0.0399766	0.0806738	-1.36797	5.06018	14.3037	0.00015556	0.000541956	-1.96524	5.06018	26.3829	2.80015e-07	1.37968e-06	-1.23995	5.06018	10.4667	0.00121547	0.0132437
sll1816	-0.675257	6.00758	6.48392	0.0108855	0.0276818	-1.01249	6.00758	14.2105	0.000163458	0.000566434	-0.70438	6.00758	6.80538	0.00908834	0.0179609	-0.0291236	6.00758	0.0114208	0.914894	0.968904
sll1817	-0.218716	6.64745	0.674672	0.411427	0.525326	-0.701624	6.64745	6.79461	0.00914335	0.0196612	-0.708331	6.64745	6.76802	0.00928059	0.0182963	-0.489615	6.64745	3.22698	0.0724341	0.255923
sll1818	-0.201335	7.45805	0.576149	0.447826	0.561859	-0.947806	7.45805	12.4247	0.000423692	0.00130524	-1.31048	7.45805	22.8732	1.73043e-06	7.25933e-06	-1.10914	7.45805	16.4609	4.96641e-05	0.00118207
sll1819	0.12891	6.67236	0.202329	0.652847	0.745619	-0.240116	6.67236	0.696076	0.404105	0.504471	-0.571256	6.67236	3.80899	0.0509781	0.081903	-0.700166	6.67236	5.71417	0.0168286	0.0965412
sll1820	-0.233604	7.45919	0.698095	0.403425	0.517323	-0.992882	7.45919	12.2669	0.000461074	0.00140573	-1.4427	7.45919	24.822	6.2877e-07	2.87957e-06	-1.20909	7.45919	17.5579	2.78688e-05	0.000741721
sll1821	-0.375255	6.49365	1.61496	0.203796	0.302987	-1.02038	6.49365	11.5796	0.00066679	0.00194875	-1.27604	6.49365	17.3737	3.07051e-05	0.000103745	-0.900782	6.49365	8.69453	0.00319167	0.0273439
sll1822	-0.0900349	7.79379	0.0950085	0.757904	0.829149	-0.623026	7.79379	4.49495	0.0339951	0.062152	-0.994132	7.79379	11.1556	0.000837804	0.00209419	-0.904097	7.79379	9.24181	0.00236552	0.0217587
sll1823	0.0881239	7.62555	0.0823773	0.774101	0.8412	0.0764462	7.62555	0.0619538	0.803434	0.852254	0.203334	7.62555	0.435562	0.509272	0.584107	0.115211	7.62555	0.139919	0.708362	0.880571
sll1824	-1.29753	5.91682	14.8951	0.00011366	0.000537196	-1.65767	5.91682	23.591	1.19142e-06	6.79884e-06	-1.70106	5.91682	24.091	9.18903e-07	4.09846e-06	-0.403524	5.91682	1.36573	0.242546	0.507768
sll1825	0.909941	5.66366	8.45932	0.00363177	0.0108286	0.993002	5.66366	10.0764	0.00150179	0.00403	0.828443	5.66366	6.82446	0.00899179	0.0177918	-0.0814984	5.66366	0.0691006	0.792651	0.924475
sll1830	-1.06554	6.1704	9.46985	0.00208876	0.006789	-1.5313	6.1704	18.9375	1.35075e-05	6.05784e-05	-1.93555	6.1704	28.5497	9.13224e-08	4.79037e-07	-0.870014	6.1704	5.90209	0.0151229	0.0894756
sll1831	-0.446784	5.04629	1.73618	0.187624	0.282567	0.288924	5.04629	0.758848	0.383689	0.482322	0.254431	5.04629	0.56877	0.450748	0.526657	0.701215	5.04629	4.17601	0.041	0.184387
sll1832	0.225679	7.15618	0.626641	0.42859	0.543182	0.479212	7.15618	2.82617	0.0927394	0.1479	0.386142	7.15618	1.81651	0.17773	0.241086	0.160463	7.15618	0.315193	0.574511	0.798556
sll1833	0.162042	6.32489	0.420303	0.516786	0.625856	0.245938	6.32489	0.969446	0.324818	0.421874	0.516132	6.32489	4.20488	0.0403079	0.0669831	0.35409	6.32489	1.98954	0.158389	0.40085
sll1834	-0.788773	4.73026	4.53376	0.0332325	0.0698421	-0.692836	4.73026	3.51967	0.0606443	0.102612	-0.55266	4.73026	2.18484	0.139376	0.197854	0.236113	4.73026	0.384565	0.53517	0.774375
sll1835	-1.93594	5.19432	27.0201	2.01351e-07	2.03039e-06	-1.7575	5.19432	22.4704	2.13404e-06	1.15295e-05	-2.53033	5.19432	41.1875	1.38303e-10	1.11156e-09	-0.594395	5.19432	2.25065	0.133559	0.364148
sll1837	-0.335371	7.36576	1.23674	0.266101	0.377305	-0.551453	7.36576	3.31962	0.0684575	0.114342	-0.91581	7.36576	8.93031	0.00280477	0.00625487	-0.580439	7.36576	3.60239	0.0576965	0.225169
sll1841	-0.0828866	8.71818	0.114567	0.735004	0.811478	-0.17812	8.71818	0.528086	0.467413	0.567056	-0.0751251	8.71818	0.0936541	0.759582	0.806872	0.00776148	8.71818	0.000998697	0.974789	0.990965
sll1845	-1.78814	3.90034	25.4037	4.65017e-07	4.27736e-06	-1.43486	3.90034	17.2975	3.19613e-05	0.000131033	-1.2427	3.90034	12.3456	0.000442016	0.00118223	0.545442	3.90034	1.98542	0.158821	0.401522
sll1848	-0.0786814	4.17565	0.0553695	0.81397	0.86955	0.105219	4.17565	0.10014	0.751661	0.811975	0.189856	4.17565	0.310241	0.577532	0.648426	0.268537	4.17565	0.610531	0.434588	0.703132
sll1849	0.633081	3.84212	3.39155	0.0655312	0.121588	0.705282	3.84212	4.21709	0.0400188	0.071751	0.939336	3.84212	7.17183	0.00740571	0.0148434	0.306255	3.84212	0.819872	0.365218	0.643092
sll1852	1.84923	6.50201	28.0806	1.16369e-07	1.23885e-06	2.11292	6.50201	36.3406	1.65675e-09	1.60103e-08	3.00952	6.50201	70.1752	5.42631e-17	1.11514e-15	1.16029	6.50201	12.2351	0.000468992	0.00631875
sll1853	1.23909	2.30599	4.5102	0.0336932	0.0705819	1.23791	2.30599	4.53266	0.0332538	0.0609926	1.82557	2.30599	9.90842	0.00164524	0.00385711	0.586483	2.30599	1.24557	0.2644	0.536567
sll1858	-0.7835	5.58338	8.91849	0.00282299	0.00877124	-1.0878	5.58338	16.6746	4.437e-05	0.000175909	-1.15985	5.58338	17.9582	2.25811e-05	7.80839e-05	-0.376352	5.58338	1.84095	0.17484	0.423248
sll1861	-0.027341	3.15808	0.00470751	0.945299	0.9637	-0.229188	3.15808	0.321265	0.570849	0.65939	0.260254	3.15808	0.402115	0.525999	0.599901	0.287595	3.15808	0.484635	0.48633	0.73685
sll1862	-0.600557	6.15257	2.23729	0.134717	0.216333	-0.246408	6.15257	0.380952	0.537094	0.631407	-0.133227	6.15257	0.110488	0.739589	0.791511	0.46733	6.15257	1.34132	0.246802	0.513381
sll1863	0.257582	4.58612	0.287609	0.591757	0.691661	0.846829	4.58612	3.13156	0.07679	0.125674	0.917801	4.58612	3.60861	0.0574813	0.0911781	0.660219	4.58612	1.89243	0.168928	0.415339
sll1864	-0.0859523	4.92064	0.0853996	0.770109	0.83932	-0.0169818	4.92064	0.00334349	0.95389	0.966089	0.15475	4.92064	0.266916	0.605408	0.67436	0.240702	4.92064	0.638693	0.424185	0.697272
sll1865	-0.726857	4.20228	5.68449	0.0171155	0.0406839	-0.554733	4.20228	3.38928	0.0656218	0.109945	-0.127742	4.20228	0.175541	0.675233	0.734254	0.599115	4.20228	3.53889	0.0599456	0.229705
sll1866	-0.661295	3.33474	2.11556	0.145809	0.230049	-0.466538	3.33474	1.0753	0.299751	0.395486	-0.610692	3.33474	1.69859	0.192472	0.258354	0.0506026	3.33474	0.0110579	0.916252	0.969394
sll1867	1.26813	10.4026	14.2404	0.00016088	0.000725526	1.86892	10.4026	29.9327	4.47301e-08	3.362e-07	2.41364	10.4026	48.0531	4.14821e-12	3.99158e-11	1.1455	10.4026	11.7234	0.000617194	0.00782823
sll1868	-1.15518	4.93881	9.02575	0.00266203	0.0083594	-1.31009	4.93881	11.416	0.000728124	0.00211469	-1.31984	4.93881	11.1924	0.000821333	0.00205777	-0.164662	4.93881	0.170726	0.679468	0.863834
sll1869	-1.76874	3.89744	24.0945	9.17209e-07	7.87878e-06	-1.56809	3.89744	19.3792	1.07166e-05	4.89406e-05	-1.75897	3.89744	21.7473	3.11021e-06	1.25141e-05	0.00976746	3.89744	0.000570802	0.980939	0.992227
sll1870	-1.47956	2.84999	8.62564	0.00331465	0.009947	-1.43209	2.84999	8.1039	0.00441702	0.0104534	-2.01085	2.84999	13.1861	0.000282029	0.000784445	-0.531295	2.84999	0.809701	0.368209	0.645907
sll1871	1.38383	7.27603	18.2524	1.9348e-05	0.000110995	1.43004	7.27603	19.4349	1.04087e-05	4.76016e-05	1.83187	7.27603	31.2146	2.31022e-08	1.33952e-07	0.448035	7.27603	2.00817	0.156454	0.397803
sll1872	0.204948	4.8576	0.38956	0.532531	0.63947	-0.0171724	4.8576	0.00270113	0.958551	0.969297	-0.182158	4.8576	0.28752	0.591814	0.66126	-0.387105	4.8576	1.3068	0.252976	0.521874
sll1873	-1.27901	8.43996	19.0373	1.28188e-05	7.86819e-05	-1.49545	8.43996	25.7059	3.97605e-07	2.47797e-06	-1.72789	8.43996	33.6033	6.75769e-09	4.15572e-08	-0.448885	8.43996	2.3641	0.124155	0.349638
sll1874	-3.01636	3.18358	22.3782	2.23896e-06	1.7146e-05	-2.84569	3.18358	20.4586	6.09349e-06	2.94867e-05	-2.81624	3.18358	18.8386	1.42257e-05	5.0871e-05	0.20012	3.18358	0.0827052	0.773664	0.912491
sll1875	-2.10397	3.22044	21.4074	3.71336e-06	2.67939e-05	-2.61566	3.22044	30.286	3.72798e-08	2.85489e-07	-3.89912	3.22044	46.5729	8.82714e-12	8.23613e-11	-1.79515	3.22044	8.1336	0.00434523	0.0346072
sll1876	-1.12398	3.36925	7.99554	0.00468928	0.0134625	-1.59034	3.36925	14.932	0.000111455	0.000403885	-1.47445	3.36925	11.7697	0.00060203	0.0015576	-0.350466	3.36925	0.598056	0.439321	0.705128
sll1878	-0.320228	7.11373	1.21169	0.270998	0.382247	0.205392	7.11373	0.502656	0.478335	0.576658	0.347968	7.11373	1.43076	0.23164	0.302549	0.668196	7.11373	5.21414	0.022404	0.118478
sll1879	-0.120634	6.20616	0.193035	0.660403	0.751341	-0.442327	6.20616	2.5596	0.109626	0.170559	-0.654481	6.20616	5.3888	0.0202664	0.0364974	-0.533848	6.20616	3.57463	0.0586685	0.227275
sll1880	-0.873989	4.2568	6.18286	0.0128994	0.0321444	-0.742088	4.2568	4.49682	0.0339579	0.062119	-1.31889	4.2568	12.4177	0.000425277	0.00114216	-0.444901	4.2568	1.34128	0.246809	0.513381
sll1882	1.44672	7.38344	16.1444	5.86923e-05	0.000303462	1.6241	7.38344	20.1956	6.99119e-06	3.31877e-05	1.69653	7.38344	21.8716	2.91514e-06	1.18023e-05	0.249804	7.38344	0.506126	0.476821	0.731051
sll1883	-0.423475	6.82646	2.39908	0.121407	0.199095	-0.318417	6.82646	1.3612	0.24333	0.33436	-0.400709	6.82646	2.11405	0.145952	0.205957	0.0227661	6.82646	0.0067754	0.934398	0.978076
sll1884	-1.48883	3.62678	7.98646	0.00471285	0.0135063	-1.17543	3.62678	5.12702	0.0235561	0.0453658	-1.24822	3.62678	5.44212	0.0196568	0.0354784	0.240612	3.62678	0.189223	0.663564	0.858022
sll1885	-0.737735	5.63269	7.50928	0.0061382	0.0169048	-1.09132	5.63269	15.9064	6.65548e-05	0.000253211	-1.35174	5.63269	22.7167	1.87734e-06	7.80501e-06	-0.614	5.63269	4.60391	0.0318992	0.157172
sll1886	-1.0149	4.87874	12.5746	0.000391027	0.00155596	-1.21706	4.87874	17.6192	2.6985e-05	0.000112913	-1.74802	4.87874	31.6344	1.861e-08	1.09668e-07	-0.733113	4.87874	5.29297	0.0214116	0.114536
sll1888	0.517236	5.84664	2.85805	0.0909176	0.157478	0.941825	5.84664	9.52661	0.00202514	0.00529012	0.930243	5.84664	9.10289	0.00255206	0.00575453	0.413007	5.84664	1.84868	0.173937	0.421813
sll1890	-0.844133	4.2792	8.91383	0.00283019	0.00877709	-0.897972	4.2792	9.94539	0.00161253	0.00430552	-1.43132	4.2792	21.0479	4.4794e-06	1.74612e-05	-0.587187	4.2792	3.25161	0.0713533	0.25293
sll1891	0.127004	6.84407	0.21443	0.643317	0.736545	0.0930641	6.84407	0.115047	0.73447	0.797067	-0.0245472	6.84407	0.00785286	0.929387	0.942154	-0.151552	6.84407	0.299544	0.584168	0.802791
sll1892	0.662773	6.92246	4.85048	0.0276384	0.0599079	0.909708	6.92246	9.11057	0.00254137	0.00645683	1.23739	6.92246	16.6047	4.60364e-05	0.000151911	0.574618	6.92246	3.69305	0.0546395	0.219541
sll1893	-0.0866206	2.6005	0.0374475	0.846557	0.892748	0.31001	2.6005	0.508646	0.475726	0.573804	-0.162762	2.6005	0.11544	0.734034	0.787123	-0.0761417	2.6005	0.0245297	0.875545	0.954506
sll1894	1.93407	7.87296	56.3064	6.20132e-14	2.72104e-12	2.57372	7.87296	96.6291	8.36101e-23	6.78705e-21	2.91825	7.87296	121.114	3.60825e-28	3.08315e-26	0.984181	7.87296	16.0607	6.13428e-05	0.00134581
sll1895	-1.06035	5.85809	8.41246	0.00372659	0.0110504	-0.887404	5.85809	5.9309	0.0148776	0.030325	-0.489639	5.85809	1.81632	0.177751	0.241086	0.570706	5.85809	2.40204	0.121177	0.343335
sll1897	0.102767	4.27426	0.115288	0.734203	0.811145	0.414338	4.27426	1.92911	0.164856	0.240404	0.403054	4.27426	1.71071	0.190894	0.256872	0.300287	4.27426	0.953028	0.32895	0.605155
sll1898	-1.00613	6.30378	14.1196	0.000171544	0.000768281	-1.68625	6.30378	37.5749	8.79687e-10	8.87064e-09	-2.46509	6.30378	71.3443	3.00025e-17	6.28505e-16	-1.45896	6.30378	25.4224	4.60548e-07	2.76926e-05
sll1899	-0.794148	6.45051	7.99011	0.00470334	0.013491	-1.14174	6.45051	16.1212	5.94149e-05	0.000229121	-1.91018	6.45051	41.3022	1.3042e-10	1.0508e-09	-1.11603	6.45051	14.2913	0.000156583	0.00274824
sll1900	-0.0302229	2.20536	0.00329668	0.954213	0.968228	-0.526746	2.20536	0.935514	0.333434	0.43031	0.082582	2.20536	0.0224356	0.880934	0.907203	0.112805	2.20536	0.0413587	0.838847	0.943851
sll1902	1.01685	5.12451	13.5997	0.000226225	0.000966516	0.997307	5.12451	13.0281	0.000306858	0.000977789	0.937888	5.12451	10.9792	0.000921392	0.00228728	-0.07896	5.12451	0.0845223	0.77126	0.910979
sll1905	0.921217	7.02168	12.0945	0.000505708	0.0019548	0.880242	7.02168	11.0369	0.000893157	0.0025262	0.899173	7.02168	11.3772	0.000743495	0.00188163	-0.0220444	7.02168	0.00706517	0.933013	0.977996
sll1906	-1.28068	5.63273	20.5154	5.91527e-06	4.0779e-05	-1.38406	5.63273	23.6315	1.16662e-06	6.6808e-06	-1.43179	5.63273	24.2718	8.36531e-07	3.76729e-06	-0.151112	5.63273	0.261707	0.60895	0.821463
sll1908	-1.13289	7.11681	17.3337	3.13579e-05	0.000171412	-1.02183	7.11681	14.1623	0.0001677	0.000576823	-1.0994	7.11681	16.1093	5.9789e-05	0.000192023	0.0334966	7.11681	0.0149593	0.902655	0.962587
sll1909	-0.626224	5.5957	5.75072	0.0164819	0.0394797	-1.06106	5.5957	15.8615	6.81525e-05	0.00025882	-1.05301	5.5957	14.9919	0.000107974	0.000329194	-0.42679	5.5957	2.40986	0.120573	0.342443
sll1910	0.048241	5.8947	0.0363689	0.848756	0.894416	-0.348922	5.8947	1.85956	0.172676	0.250079	-0.369122	5.8947	2.00266	0.157023	0.217887	-0.417363	5.8947	2.55724	0.10979	0.324026
sll1911	-1.02369	2.20907	2.55961	0.109625	0.184623	-0.688103	2.20907	1.20943	0.271446	0.367091	-1.30054	2.20907	3.59468	0.0579648	0.0919002	-0.276844	2.20907	0.147968	0.700485	0.876
sll1912	0.22972	2.9984	0.309263	0.578133	0.679651	0.252448	2.9984	0.372167	0.541825	0.636277	0.534197	2.9984	1.58058	0.208677	0.2769	0.304477	2.9984	0.526236	0.468194	0.725926
sll1913	-0.105623	2.97876	0.069816	0.791605	0.85365	-0.205851	2.97876	0.261907	0.608813	0.690711	0.403725	2.97876	1.00308	0.316567	0.393677	0.509348	2.97876	1.5532	0.212664	0.472311
sll1915	0.585207	6.78882	4.42753	0.0353636	0.0731373	0.888846	6.78882	10.1994	0.00140484	0.00380599	0.881501	6.78882	9.90539	0.00164796	0.00386069	0.296294	6.78882	1.14706	0.284165	0.556841
sll1916	1.40333	4.05059	10.0688	0.00150801	0.00512189	1.46155	4.05059	10.9787	0.000921634	0.00259769	1.41798	4.05059	9.92688	0.00162883	0.00382139	0.0146503	4.05059	0.00119887	0.972379	0.990375
sll1920	0.814439	7.39111	9.83709	0.00171028	0.00567819	1.00224	7.39111	14.8453	0.000116699	0.000421025	1.41534	7.39111	29.0659	6.99585e-08	3.75463e-07	0.600901	7.39111	5.46266	0.0194271	0.107278
sll1921	0.776243	5.97267	7.16363	0.00743965	0.0199476	1.12066	5.97267	14.9599	0.000109819	0.000398415	1.47805	5.97267	25.5406	4.33172e-07	2.0533e-06	0.70181	5.97267	6.08135	0.0136616	0.0830698
sll1924	-0.365492	3.79019	0.77872	0.377533	0.492903	-0.234623	3.79019	0.320067	0.571568	0.659751	-0.38442	3.79019	0.802976	0.370205	0.449769	-0.0189284	3.79019	0.00190396	0.965196	0.987448
sll1925	0.403968	6.82284	2.07856	0.149381	0.234546	0.493166	6.82284	3.09582	0.0784935	0.128088	0.53018	6.82284	3.53397	0.0601237	0.0949522	0.126213	6.82284	0.202525	0.652691	0.852488
sll1926	-1.4735	6.57428	32.5723	1.14841e-08	1.56909e-07	-2.17971	6.57428	66.8686	2.90227e-16	9.23889e-15	-2.64205	6.57428	90.2171	2.13408e-21	7.21807e-20	-1.16856	6.57428	18.1501	2.04156e-05	0.000571462
sll1927	-1.31453	7.61642	14.6061	0.000132483	0.00061453	-1.68867	7.61642	23.529	1.23044e-06	6.98466e-06	-1.96599	7.61642	31.0206	2.55308e-08	1.46983e-07	-0.651452	7.61642	3.57441	0.0586763	0.227275
sll1929	-0.75366	5.14757	8.20265	0.00418292	0.0121376	-0.973596	5.14757	13.3484	0.000258647	0.000847453	-1.22108	5.14757	19.1361	1.21718e-05	4.40601e-05	-0.467416	5.14757	2.68987	0.100988	0.311208
sll1931	1.09664	9.92959	11.9434	0.000548408	0.00210482	1.3187	9.92959	17.1056	3.53574e-05	0.000143507	1.30583	9.92959	16.7658	4.22878e-05	0.000140254	0.209189	9.92959	0.445116	0.504663	0.75167
sll1932	-0.265158	6.69923	1.13422	0.286877	0.399782	-0.319618	6.69923	1.64202	0.200048	0.283402	0.189336	6.69923	0.576004	0.447883	0.523875	0.454494	6.69923	3.27904	0.0701699	0.250064
sll1933	-0.818835	3.29964	4.99137	0.025474	0.0561402	-0.791678	3.29964	4.69977	0.0301667	0.0558764	-1.05645	3.29964	7.09425	0.00773315	0.0154425	-0.237614	3.29964	0.322721	0.569977	0.794639
sll1934	0.572026	4.29558	1.13721	0.286243	0.39924	0.37781	4.29558	0.496417	0.481079	0.578756	0.270743	4.29558	0.247756	0.61866	0.684659	-0.301284	4.29558	0.31211	0.576388	0.798556
sll1937	-0.326521	4.72011	0.840137	0.359358	0.473745	-0.180518	4.72011	0.259393	0.610538	0.69146	-0.279771	4.72011	0.595532	0.440288	0.517414	0.0467505	4.72011	0.0163266	0.898326	0.962587
sll1938	1.93412	5.66776	42.632	6.60704e-11	1.46939e-09	2.12421	5.66776	51.4421	7.37403e-13	1.32712e-11	2.25407	5.66776	56.7492	4.95085e-14	6.13565e-13	0.319956	5.66776	1.36838	0.24209	0.507139
sll1939	-0.371464	4.33591	0.951463	0.329347	0.443915	-0.471447	4.33591	1.51836	0.217868	0.304549	-0.599722	4.33591	2.30472	0.128982	0.184821	-0.228259	4.33591	0.327097	0.567373	0.794203
sll1940	-0.739748	3.65316	3.94242	0.047083	0.0925975	-1.16632	3.65316	9.25756	0.00234526	0.0060103	-0.909642	3.65316	5.31594	0.0211312	0.0379077	-0.169895	3.65316	0.173503	0.677017	0.862764
sll1941	-2.13497	3.59077	33.2184	8.23677e-09	1.15778e-07	-1.81845	3.59077	25.3475	4.78761e-07	2.9442e-06	-1.83603	3.59077	23.5495	1.2174e-06	5.28462e-06	0.298936	3.59077	0.488457	0.484617	0.735648
sll1942	-1.17456	5.81983	14.6495	0.000129469	0.000602485	-1.3245	5.81983	18.3754	1.81386e-05	7.93749e-05	-1.59773	5.81983	25.2671	4.99148e-07	2.32864e-06	-0.42317	5.81983	1.75983	0.184646	0.435084
sll1945	-0.969931	8.04735	4.78807	0.0286575	0.061501	-0.98058	8.04735	4.89266	0.026971	0.0509144	-1.44099	8.04735	10.294	0.00133465	0.00319116	-0.471061	8.04735	1.13479	0.286755	0.558856
sll1946	-0.531733	4.7562	2.83388	0.0922949	0.159151	-0.687138	4.7562	4.66116	0.0308523	0.0570161	-0.785484	4.7562	5.72709	0.0167052	0.0307492	-0.253751	4.7562	0.579124	0.446656	0.71063
sll1949	0.546483	8.30691	2.44492	0.117906	0.194236	0.749868	8.30691	4.58518	0.0322496	0.0593284	0.91251	8.30691	6.7428	0.00941267	0.0185006	0.366027	8.30691	1.10218	0.293788	0.565726
sll1950	0.583815	7.11127	4.70678	0.0300438	0.0640527	1.00486	7.11127	13.8891	0.000193917	0.000656569	1.26358	7.11127	21.6556	3.26257e-06	1.30463e-05	0.679762	7.11127	6.46311	0.0110136	0.0705351
sll1951	-0.94017	14.3702	7.81032	0.00519487	0.0146676	-1.31228	14.3702	14.9763	0.000108871	0.000395863	-1.28151	14.3702	14.3025	0.00015566	0.000461156	-0.341338	14.3702	1.0449	0.306684	0.57986
sll1954	1.18895	6.01172	13.5567	0.00023146	0.000983703	1.13001	6.01172	12.2256	0.000471376	0.00143177	1.22779	6.01172	14.2221	0.000162448	0.000476451	0.03884	6.01172	0.0151107	0.902166	0.962587
sll1956	-0.849084	3.926	5.04115	0.0247521	0.0549351	-1.1686	3.926	9.16216	0.00247071	0.00629598	-1.29213	3.926	10.2608	0.00135885	0.00324186	-0.443049	3.926	1.14463	0.284676	0.557126
sll1957	0.702997	3.1439	3.03365	0.0815542	0.14502	0.101718	3.1439	0.0587011	0.808561	0.856608	0.172901	3.1439	0.156964	0.691967	0.749939	-0.530096	3.1439	1.59454	0.206679	0.463777
sll1958	-1.26777	3.92546	14.3628	0.000150747	0.000687467	-0.470057	3.92546	2.20724	0.137364	0.20554	-0.925634	3.92546	7.39712	0.00653282	0.0133015	0.342132	3.92546	0.87114	0.35064	0.626253
sll1960	-0.442622	3.18226	1.10509	0.293151	0.406605	-0.426662	3.18226	1.0134	0.31409	0.410713	-0.972408	3.18226	4.47563	0.0343815	0.0583569	-0.529785	3.18226	1.26098	0.261466	0.533387
sll1961	0.252366	5.72065	0.485109	0.486117	0.599933	0.604781	5.72065	2.79626	0.0944843	0.150093	0.473005	5.72065	1.68418	0.19437	0.260685	0.220639	5.72065	0.369599	0.543223	0.78048
sll1965	-0.206661	2.53804	0.171078	0.679155	0.767126	0.610849	2.53804	1.67094	0.196133	0.278828	0.221619	2.53804	0.191088	0.662012	0.723025	0.42828	2.53804	0.684304	0.408109	0.68095
sll1967	0.666494	5.62508	5.05847	0.0245058	0.0547013	1.12301	5.62508	14.4904	0.000140873	0.000498272	1.09661	5.62508	13.5038	0.000238084	0.000672811	0.430112	5.62508	2.1739	0.14037	0.374513
sll1968	1.27619	7.03212	14.9013	0.000113282	0.000536192	1.55761	7.03212	21.9725	2.76589e-06	1.43693e-05	2.07191	7.03212	37.8136	7.78389e-10	5.61651e-09	0.79572	7.03212	6.04831	0.0139196	0.0843229
sll1969	0.639303	2.82686	1.71225	0.190694	0.286526	0.533491	2.82686	1.19282	0.274761	0.370817	0.426665	2.82686	0.679809	0.409653	0.490646	-0.212638	2.82686	0.181164	0.670375	0.859339
sll1971	-1.19067	3.41177	14.4064	0.000147304	0.000675557	-1.07696	3.41177	12.0633	0.000514238	0.0015518	-1.50452	3.41177	18.743	1.49572e-05	5.33107e-05	-0.313849	3.41177	0.668901	0.413435	0.687221
sll1973	-0.283091	6.14871	0.581397	0.445765	0.560139	-0.061354	6.14871	0.0274765	0.868346	0.906015	-0.118464	6.14871	0.101009	0.750622	0.800679	0.164628	6.14871	0.19382	0.659756	0.857582
sll1979	-0.0289111	6.03205	0.00884615	0.925066	0.950421	-0.188754	6.03205	0.374244	0.5407	0.635186	-0.184721	6.03205	0.351187	0.553442	0.625479	-0.155809	6.03205	0.249011	0.617772	0.828214
sll1980	0.377365	6.7123	1.14472	0.284658	0.397371	0.351871	6.7123	0.995129	0.318492	0.415652	0.486365	6.7123	1.88206	0.1701	0.232718	0.109	6.7123	0.09539	0.757434	0.902948
sll1981	1.76514	8.46712	47.8443	4.61442e-12	1.32465e-10	2.41126	8.46712	86.2187	1.61096e-20	9.86943e-19	2.86474	8.46712	117.73	1.98633e-27	1.46582e-25	1.09961	8.46712	19.8169	8.52248e-06	0.00027952
sll1982	2.18284	5.69934	22.647	1.94662e-06	1.51575e-05	2.21721	5.69934	23.2973	1.38798e-06	7.78371e-06	2.61326	5.69934	31.5875	1.90652e-08	1.12146e-07	0.430414	5.69934	1.00137	0.316978	0.59151
sll1983	3.65553	2.84823	34.9128	3.44808e-09	5.2811e-08	3.3988	2.84823	29.2871	6.24084e-08	4.56397e-07	3.31967	2.84823	26.1091	3.22668e-07	1.57787e-06	-0.335861	2.84823	0.492186	0.482954	0.734867
sll1985	3.76687	5.79029	44.7077	2.28756e-11	5.62706e-10	2.56134	5.79029	22.3256	2.30123e-06	1.23099e-05	2.18098	5.79029	16.2661	5.50405e-05	0.000178895	-1.58589	5.79029	9.59339	0.00195279	0.0188414
sll1987	0.650591	7.78811	5.01653	0.0251064	0.0556075	0.641868	7.78811	4.88183	0.0271408	0.0511174	0.865266	7.78811	8.78663	0.00303446	0.00669809	0.214674	7.78811	0.551051	0.457889	0.718496
sll1988	1.40017	7.69262	27.5779	1.50894e-07	1.57234e-06	1.74716	7.69262	42.3859	7.49293e-11	9.21574e-10	2.0413	7.69262	56.7532	4.94091e-14	6.13565e-13	0.641128	7.69262	6.09724	0.0135393	0.0824805
sll1994	-0.826089	5.56356	6.10543	0.0134767	0.0334293	-1.15958	5.56356	11.7441	0.000610359	0.0018099	-0.863683	5.56356	6.47548	0.0109373	0.0211641	-0.0375941	5.56356	0.0120619	0.912547	0.968313
sll1995	-1.38459	3.39095	10.3202	0.00131582	0.00453073	-1.48582	3.39095	11.6087	0.000656429	0.00192541	-1.33324	3.39095	8.94546	0.0027816	0.006216	0.0513506	3.39095	0.0118915	0.913164	0.968464
sll1999	-0.452163	1.72441	0.378177	0.538581	0.644352	-1.33473	1.72441	2.90425	0.0883461	0.141768	-1.483	1.72441	3.11545	0.0775532	0.119005	-1.03083	1.72441	1.45261	0.228109	0.492795
sll2001	-0.235299	4.35803	0.732951	0.391928	0.506202	0.0479669	4.35803	0.0315199	0.859085	0.897507	-0.0714162	4.35803	0.0634884	0.801065	0.842584	0.163882	4.35803	0.322845	0.569903	0.794639
sll2002	-0.819971	3.2234	4.45508	0.0347977	0.0723818	-0.959663	3.2234	5.93432	0.0148488	0.0302852	-1.08361	3.2234	6.77329	0.00925319	0.0182534	-0.263636	3.2234	0.363116	0.546781	0.780953
sll2003	-1.38684	4.63967	19.4411	1.0375e-05	6.57961e-05	-1.47148	4.63967	21.4871	3.56212e-06	1.79879e-05	-2.06631	4.63967	36.617	1.43776e-09	9.97521e-09	-0.679463	4.63967	3.69123	0.0546993	0.219541
sll2005	-2.10504	8.09631	55.4092	9.78789e-14	3.97266e-12	-2.5735	8.09631	79.5279	4.75471e-19	2.41227e-17	-2.84902	8.09631	94.0635	3.05563e-22	1.16725e-20	-0.743979	8.09631	7.05815	0.00789054	0.0553361
sll2006	-0.241075	3.42642	0.34496	0.55698	0.662217	-0.528614	3.42642	1.5959	0.206485	0.291012	-0.563078	3.42642	1.673	0.195857	0.262464	-0.322003	3.42642	0.533672	0.465067	0.724664
sll2007	0.0173555	4.07167	0.00172134	0.966906	0.977138	0.165468	4.07167	0.156635	0.692274	0.764042	-0.818547	4.07167	3.33314	0.067897	0.105484	-0.835903	4.07167	3.47519	0.0622954	0.233303
sll2008	0.656146	6.48684	3.40714	0.0649149	0.120703	1.04267	6.48684	8.56196	0.00343259	0.00838647	1.09204	6.48684	9.29139	0.00230233	0.00524241	0.435893	6.48684	1.5248	0.216894	0.477496
sll2009	0.659916	4.77962	4.37389	0.0364936	0.0748062	0.714644	4.77962	5.13534	0.0234435	0.0451978	0.873579	4.77962	7.41249	0.00647727	0.0132026	0.213664	4.77962	0.467505	0.494137	0.741563
sll2010	-1.01752	2.97905	5.80479	0.0159826	0.0384982	-1.34071	2.97905	9.53058	0.00202077	0.00528296	-1.43581	2.97905	9.56342	0.00198493	0.00458071	-0.418289	2.97905	0.72194	0.395508	0.670959
sll2011	-0.151822	2.51748	0.123921	0.724821	0.802145	-0.61314	2.51748	1.83538	0.175493	0.253368	-0.413698	2.51748	0.77253	0.379436	0.458685	-0.261876	2.51748	0.299446	0.58423	0.802791
sll2012	0.470182	4.84075	2.96471	0.0850996	0.149847	0.513388	4.84075	3.53952	0.0599229	0.101603	0.0179642	4.84075	0.0039171	0.950096	0.95916	-0.452218	4.84075	2.5592	0.109654	0.324026
sll2013	-2.33818	4.42832	34.4543	4.36373e-09	6.38244e-08	-3.23961	4.42832	58.3364	2.20914e-14	5.12364e-13	-2.97303	4.42832	47.7158	4.92708e-12	4.69157e-11	-0.634848	4.42832	2.02692	0.154533	0.394473
sll2014	-1.50963	4.04967	18.7874	1.46131e-05	8.75436e-05	-1.4566	4.04967	17.48	2.90353e-05	0.000120714	-1.71701	4.04967	21.7641	3.08321e-06	1.24511e-05	-0.207381	4.04967	0.281945	0.595429	0.811703
sll2015	-0.0910174	4.06376	0.0840333	0.771904	0.839656	-0.365733	4.06376	1.30922	0.252536	0.344821	-0.0681458	4.06376	0.0435844	0.834629	0.86916	0.0228716	4.06376	0.00481398	0.944685	0.983769
sll5002	-0.858192	3.69644	5.28737	0.0214807	0.0491181	-0.669338	3.69644	3.27176	0.0704819	0.117301	-0.407521	3.69644	1.16355	0.280731	0.355651	0.450671	3.69644	1.29896	0.254404	0.523478
sll5004	0.0306171	1.87375	0.00255264	0.959705	0.971883	0.106266	1.87375	0.0296589	0.863266	0.901585	-0.884187	1.87375	1.56132	0.211472	0.279809	-0.914804	1.87375	1.67428	0.195686	0.447459
sll5014	0.25896	2.51689	0.279664	0.596921	0.696567	-0.00202482	2.51689	1.55405e-05	0.996855	0.997372	-0.448376	2.51689	0.66717	0.41404	0.494624	-0.707335	2.51689	1.70263	0.191944	0.443255
sll5026	-0.0996677	4.51383	0.11344	0.736261	0.811763	-0.450274	4.51383	2.22496	0.135797	0.203664	0.0349249	4.51383	0.0131543	0.908689	0.928126	0.134593	4.51383	0.19306	0.660382	0.857857
sll5028	0.217208	3.51404	0.179986	0.671385	0.760903	0.32103	3.51404	0.397193	0.528543	0.624519	-0.175087	3.51404	0.109173	0.741087	0.792592	-0.392295	3.51404	0.552162	0.457436	0.718496
sll5030	-0.733359	5.10141	4.72202	0.0297787	0.0635292	-0.954093	5.10141	7.82221	0.00516079	0.0119098	-1.02167	5.10141	8.61454	0.00333489	0.00728694	-0.288315	5.10141	0.672402	0.412215	0.68604
sll5032	-1.24174	2.14739	5.67779	0.017181	0.0408015	-0.734731	2.14739	2.20845	0.137257	0.205526	-0.0053003	2.14739	0.000114125	0.991476	0.992699	1.23644	2.14739	5.04746	0.024662	0.126505
sll5033	-1.76896	3.22874	12.84	0.00033928	0.00137705	-1.75359	3.22874	12.6833	0.000368933	0.0011563	-0.178528	3.22874	0.150527	0.698032	0.755252	1.59044	3.22874	9.89901	0.00165368	0.0167274
sll5034	-0.703833	4.26306	5.16359	0.0230651	0.0520087	-0.896711	4.26306	8.14751	0.00431204	0.0102273	-0.0371619	4.26306	0.0145623	0.903949	0.9256	0.666671	4.26306	4.35412	0.0369195	0.172238
sll5035	-1.0164	3.4889	4.32847	0.0374799	0.0762991	-0.628213	3.4889	1.73021	0.188384	0.26899	1.45628	3.4889	10.6416	0.00110573	0.00269542	2.47268	3.4889	26.5863	2.52019e-07	1.63661e-05
sll5036	0.766034	5.67585	1.74654	0.186313	0.280723	2.85563	5.67585	27.4198	1.63743e-07	1.11229e-06	6.07562	5.67585	108.143	2.50078e-25	1.47637e-23	5.30959	5.67585	91.1458	1.33464e-21	4.33357e-18
sll5041	1.28977	2.35385	6.59082	0.0102506	0.0263111	0.332219	2.35385	0.37056	0.542699	0.636843	1.16537	2.35385	4.8252	0.0280466	0.048602	-0.1244	2.35385	0.0670007	0.795755	0.926099
sll5042	-0.713781	2.49757	2.43226	0.118861	0.195414	-1.19948	2.49757	6.28901	0.0121489	0.0253193	-1.90458	2.49757	12.1159	0.000499935	0.00132405	-1.1908	2.49757	4.28166	0.0385257	0.177185
sll5047	0.110469	3.013	0.0844951	0.771296	0.839476	0.225631	3.013	0.360339	0.548318	0.641812	0.567377	3.013	2.18437	0.139418	0.197854	0.456908	3.013	1.42486	0.232605	0.497949
sll5048	0.590547	4.95707	4.61175	0.0317536	0.0672125	0.0442585	4.95707	0.0249541	0.874481	0.910369	0.0609055	4.95707	0.0446271	0.832691	0.868492	-0.529641	4.95707	3.49618	0.0615107	0.2317
sll5049	-0.199702	3.98786	0.33466	0.562928	0.666846	-0.506305	3.98786	2.06912	0.150308	0.221942	-0.901093	3.98786	5.76466	0.0163516	0.0301669	-0.701391	3.98786	3.42623	0.0641686	0.237307
sll5050	-0.78492	3.1685	5.48921	0.0191341	0.0445047	-0.791214	3.1685	5.56774	0.0182944	0.036287	-0.476893	3.1685	1.90304	0.167738	0.230221	0.308027	3.1685	0.685065	0.407848	0.68095
sll5052	-0.340715	3.66804	0.707346	0.400326	0.514388	-0.391364	3.66804	0.924808	0.336216	0.433211	-0.378461	3.66804	0.807698	0.368802	0.448334	-0.0377458	3.66804	0.00783263	0.929478	0.976703
sll5057	-0.633153	2.30246	1.48297	0.223311	0.327207	-0.0766227	2.30246	0.0239213	0.877085	0.912495	0.0912835	2.30246	0.0317757	0.858521	0.887494	0.724436	2.30246	1.77598	0.182644	0.433596
sll5059	-0.83239	4.17984	5.1093	0.0237979	0.0533277	-0.897352	4.17984	5.85568	0.0155268	0.0315295	-0.807337	4.17984	4.54016	0.0331085	0.056373	0.0250525	4.17984	0.00414185	0.948686	0.985335
sll5060	0.580405	4.96393	2.88462	0.0894292	0.155448	0.357004	4.96393	1.07994	0.29871	0.394433	0.618684	4.96393	3.15637	0.0756313	0.116441	0.0382789	4.96393	0.0124586	0.911126	0.967755
sll5061	0.870908	6.80185	2.26912	0.131975	0.213407	1.08677	6.80185	3.50496	0.0611854	0.10342	1.49612	6.80185	6.51767	0.0106808	0.0207082	0.625212	6.80185	1.18263	0.27682	0.549807
sll5063	1.27763	5.80309	17.5855	2.7468e-05	0.000152459	1.36786	5.80309	20.1702	7.08464e-06	3.35822e-05	1.43627	5.80309	21.7549	3.09799e-06	1.24804e-05	0.158643	5.80309	0.287838	0.591609	0.809587
sll5069	0.28186	3.399	0.495553	0.481461	0.595998	0.11815	3.399	0.0858703	0.769494	0.825966	0.327766	3.399	0.6267	0.428568	0.507499	0.0459056	3.399	0.0126368	0.910495	0.967401
sll5075	0.490964	5.65399	2.63382	0.10461	0.177465	0.145834	5.65399	0.229041	0.632236	0.711814	-0.194188	5.65399	0.387196	0.533777	0.606429	-0.685152	5.65399	4.87032	0.0273225	0.137758
sll5076	-0.000983821	3.20703	4.00973e-06	0.998402	0.999018	-0.2553	3.20703	0.273242	0.601165	0.684064	0.00750679	3.20703	0.000220806	0.988144	0.99006	0.00849062	3.20703	0.000280782	0.986631	0.994904
sll5079	0.330764	3.85315	0.947233	0.330425	0.444813	0.269392	3.85315	0.621918	0.430335	0.53109	0.366803	3.85315	1.07871	0.298985	0.376057	0.0360397	3.85315	0.0107298	0.917499	0.970081
sll5080	1.09717	5.61697	15.5435	8.06282e-05	0.000397872	0.878652	5.61697	9.89007	0.00166173	0.00442117	0.818075	5.61697	8.30991	0.00394293	0.00846738	-0.279099	5.61697	1.02854	0.310501	0.584462
sll5081	-0.148846	3.02659	0.0963683	0.756232	0.827599	-0.00866795	3.02659	0.000339181	0.985306	0.990492	0.12846	3.02659	0.0683809	0.793709	0.836201	0.277306	3.02659	0.311819	0.576566	0.798556
sll5083	0.504003	6.48612	2.28233	0.130855	0.211913	-0.153963	6.48612	0.210856	0.646097	0.725157	-0.169353	6.48612	0.251224	0.616215	0.682884	-0.673356	6.48612	3.97136	0.0462805	0.198773
sll5086	0.214044	3.59318	0.43093	0.511533	0.621147	0.19031	3.59318	0.338326	0.560797	0.651022	0.23116	3.59318	0.456011	0.499494	0.574516	0.0171168	3.59318	0.00255631	0.959676	0.987448
sll5089	-0.596815	1.87409	1.41541	0.23416	0.340339	-0.276371	1.87409	0.323984	0.569223	0.658385	-1.33963	1.87409	4.91608	0.0266078	0.0462998	-0.742814	1.87409	1.32021	0.250554	0.520172
sll5094	0.0953377	2.01303	0.0242831	0.876167	0.915941	0.767521	2.01303	1.77812	0.18238	0.261777	0.999238	2.01303	2.8699	0.0902505	0.135731	0.9039	2.01303	2.34875	0.125384	0.350918
sll5097	0.921968	5.02957	3.17867	0.0746056	0.134514	0.687339	5.02957	1.76271	0.184286	0.263835	0.819759	5.02957	2.4732	0.115802	0.168765	-0.102209	5.02957	0.039629	0.842208	0.944067
sll5109	-0.982388	3.22283	4.02197	0.0449113	0.0889471	-1.27255	3.22283	6.58036	0.010311	0.0219109	-1.22424	3.22283	5.63961	0.0175591	0.0321208	-0.24185	3.22283	0.206497	0.649527	0.849724
sll5122	0.287393	2.45275	0.247879	0.618572	0.713754	0.240757	2.45275	0.173015	0.677446	0.752795	1.42053	2.45275	6.3648	0.0116406	0.022286	1.13314	2.45275	4.16638	0.0412338	0.184722
sll5128	0.0461099	7.62978	0.0129923	0.909251	0.939038	-0.0762546	7.62978	0.035491	0.85057	0.891191	-0.266773	7.62978	0.431544	0.511232	0.585734	-0.312883	7.62978	0.593067	0.441236	0.706456
sll5132	-0.211982	2.59667	0.214141	0.643541	0.736545	-0.304377	2.59667	0.433669	0.510194	0.606813	-0.307755	2.59667	0.396489	0.528908	0.602161	-0.0957733	2.59667	0.0370032	0.847459	0.946135
sll6036	-1.04042	2.30058	2.52073	0.112359	0.187926	-0.605991	2.30058	0.897784	0.343377	0.440863	-1.01949	2.30058	2.25267	0.133384	0.19054	0.0209312	2.30058	0.000907638	0.975966	0.99154
sll6052	-0.283551	3.47633	0.712798	0.398516	0.512875	-0.709061	3.47633	4.1657	0.0412503	0.0735932	-0.692211	3.47633	3.572	0.0587614	0.0930724	-0.408661	3.47633	1.19242	0.274842	0.547493
sll6053	0.0722037	2.87464	0.0262585	0.871271	0.911703	-0.182472	2.87464	0.161749	0.687551	0.760122	-0.0673918	2.87464	0.0204039	0.886415	0.911685	-0.139595	2.87464	0.0874348	0.767464	0.909473
sll6055	-0.254091	4.3719	0.265323	0.606486	0.703559	-0.664185	4.3719	1.77148	0.183198	0.262509	-0.368857	4.3719	0.539317	0.462716	0.538123	-0.114766	4.3719	0.0517524	0.820042	0.934471
sll6059	0.3405	2.68539	0.410433	0.52175	0.629435	1.29361	2.68539	6.73927	0.00943133	0.0202403	1.70887	2.68539	11.5775	0.00066753	0.00170936	1.36836	2.68539	7.78066	0.00528086	0.0400861
sll6060	2.03041	3.05424	15.7228	7.3335e-05	0.000368035	2.37749	3.05424	22.1377	2.53772e-06	1.33766e-05	2.45329	3.05424	22.5217	2.07778e-06	8.59432e-06	0.422886	3.05424	0.922258	0.336883	0.612463
sll6093	-0.727456	3.35906	1.41983	0.233431	0.339431	-0.970365	3.35906	2.47254	0.115851	0.178185	-0.669567	3.35906	1.18256	0.276836	0.351265	0.0578886	3.35906	0.00868519	0.925749	0.974046
sll6098	-0.798011	5.81491	5.62623	0.0176937	0.0417461	-0.849405	5.81491	6.31926	0.0119434	0.024955	-0.68022	5.81491	4.0183	0.0450091	0.0735134	0.117791	5.81491	0.11859	0.730569	0.892337
sll6109	-0.322839	4.08638	0.788841	0.374451	0.489864	0.100431	4.08638	0.0786518	0.779133	0.833008	0.00860826	4.08638	0.000552683	0.981244	0.984275	0.331447	4.08638	0.784322	0.375823	0.656002
sll7001	4.07679	2.46854	46.1166	1.1142e-11	2.90801e-10	2.29729	2.46854	11.0531	0.000885394	0.00250862	2.68923	2.46854	14.8636	0.000115572	0.000349406	-1.38756	2.46854	8.33322	0.00389266	0.0318374
sll7003	2.33029	4.77316	40.7245	1.75277e-10	3.53494e-09	1.57	4.77316	18.387	1.80281e-05	7.89975e-05	0.877368	4.77316	5.28473	0.0215132	0.0384655	-1.45293	4.77316	16.6154	4.57772e-05	0.00110103
sll7006	0.432134	4.85454	1.40164	0.236449	0.343042	0.197889	4.85454	0.289859	0.590311	0.675384	0.516379	4.85454	1.93979	0.163691	0.225788	0.0842452	4.85454	0.0527172	0.818401	0.933756
sll7028	-1.16831	4.53769	14.7445	0.000123105	0.000576797	-0.910777	4.53769	9.213	0.00240302	0.00613896	-1.00443	4.53769	10.351	0.00129406	0.00311016	0.163883	4.53769	0.251075	0.616319	0.827279
sll7029	-1.47838	2.10039	4.64469	0.0311497	0.0661498	-2.11673	2.10039	8.54398	0.00346667	0.00845716	-2.05521	2.10039	7.35434	0.00669012	0.0135853	-0.57683	2.10039	0.521253	0.470308	0.727068
sll7030	-1.35659	2.49486	9.79449	0.00175035	0.00578757	-1.03865	2.49486	6.13681	0.0132396	0.027364	-1.96188	2.49486	15.141	9.97732e-05	0.000306493	-0.60529	2.49486	1.13404	0.286915	0.558856
sll7031	-1.56013	3.20087	6.43281	0.0112031	0.0283306	-1.75709	3.20087	8.01944	0.00462778	0.0108415	-2.16428	3.20087	10.8354	0.000995759	0.00245313	-0.604158	3.20087	0.810626	0.367935	0.645776
sll7033	-1.52866	3.78624	10.1961	0.0014074	0.00481541	-1.31022	3.78624	7.59448	0.00585472	0.0133032	-1.77313	3.78624	12.4505	0.000417878	0.00112322	-0.244467	3.78624	0.22289	0.636847	0.841612
sll7034	0.0476469	2.96917	0.00687727	0.933908	0.956593	-0.0776927	2.96917	0.0181345	0.892877	0.924891	0.471515	2.96917	0.66249	0.415682	0.496038	0.423868	2.96917	0.533579	0.465106	0.724664
sll7044	-0.804422	3.71395	4.83124	0.0279486	0.0604188	-0.609406	3.71395	2.81525	0.0933724	0.148545	-0.569946	3.71395	2.31635	0.12802	0.183605	0.234476	3.71395	0.358988	0.549069	0.780953
sll7047	2.12849	6.85273	52.2733	4.829e-13	1.70432e-11	2.67322	6.85273	80.7103	2.61352e-19	1.41435e-17	2.92549	6.85273	94.8636	2.03968e-22	7.97931e-21	0.797001	6.85273	8.45905	0.00363232	0.0306341
sll7055	-1.64531	3.06344	6.29235	0.012126	0.0304275	-1.31133	3.06344	4.12092	0.042356	0.0751119	-1.61578	3.06344	5.70055	0.0169596	0.0311646	0.0295295	3.06344	0.00174899	0.966641	0.987448
sll7056	0.794187	2.65564	2.50989	0.113134	0.188503	0.889206	2.65564	3.14351	0.0762298	0.124946	0.669709	2.65564	1.60883	0.204656	0.272567	-0.124478	2.65564	0.0612817	0.804482	0.929591
sll7062	-0.924609	6.11407	4.55928	0.0327409	0.068898	-2.58332	6.11407	31.4725	2.02288e-08	1.6218e-07	-3.10007	6.11407	42.0436	8.92618e-11	7.31902e-10	-2.17546	6.11407	21.7877	3.04541e-06	0.000131846
sll7063	-0.891695	7.10821	4.97878	0.0256601	0.0563724	-2.13211	7.10821	26.3412	2.86124e-07	1.82727e-06	-2.6747	7.10821	39.0397	4.15281e-10	3.13586e-09	-1.78301	7.10821	18.2795	1.90753e-05	0.000543833
sll7064	-0.511723	4.91578	1.38222	0.239723	0.347182	-2.55501	4.91578	28.9966	7.25045e-08	5.26671e-07	-2.72952	4.91578	30.9991	2.58143e-08	1.48352e-07	-2.2178	4.91578	20.7547	5.22037e-06	0.000198891
sll7065	-0.758619	3.87609	2.98993	0.0837837	0.148173	-2.13461	3.87609	20.5364	5.8508e-06	2.83546e-05	-2.7889	3.87609	29.2818	6.25801e-08	3.38099e-07	-2.03028	3.87609	15.2809	9.26495e-05	0.00186853
sll7066	-1.12244	5.72474	7.70248	0.0055145	0.0154436	-1.93831	5.72474	21.5434	3.45917e-06	1.74952e-05	-2.43903	5.72474	31.7542	1.74971e-08	1.03673e-07	-1.31659	5.72474	9.59083	0.00195551	0.0188414
sll7067	-2.06771	5.71819	26.1343	3.1848e-07	3.01488e-06	-3.16279	5.71819	54.574	1.497e-13	3.13597e-12	-3.96787	5.71819	74.6574	5.59916e-18	1.3368e-16	-1.90016	5.71819	18.337	1.85078e-05	0.000541394
sll7070	-2.1414	3.48167	24.6828	6.75833e-07	6.04526e-06	-2.34871	3.48167	28.449	9.62015e-08	6.85014e-07	-3.93312	3.48167	52.5843	4.12168e-13	4.46103e-12	-1.79172	3.48167	9.04179	0.00263878	0.0234743
sll7075	1.15205	3.95993	10.0808	0.00149824	0.005094	1.07135	3.95993	8.61246	0.00333871	0.00818791	0.80027	3.95993	4.43421	0.0352256	0.059696	-0.351778	3.95993	0.962564	0.326542	0.60209
sll7078	-1.36489	2.62722	8.25099	0.00407298	0.0118716	-1.56244	2.62722	10.3409	0.00130117	0.00355932	-1.1839	2.62722	5.77239	0.0162798	0.0300515	0.180993	2.62722	0.113608	0.736074	0.895379
sll7085	0.255482	5.86688	0.472565	0.491809	0.605259	-0.637198	5.86688	2.85422	0.0911346	0.145733	-0.726721	5.86688	3.61905	0.0571216	0.0907682	-0.982204	5.86688	6.59153	0.0102465	0.0668079
sll7087	0.278136	3.19934	0.449747	0.502455	0.615417	-0.464987	3.19934	1.15667	0.282157	0.377644	-0.668216	3.19934	2.06958	0.150263	0.210212	-0.946352	3.19934	4.24252	0.0394237	0.179284
sll7089	-0.440396	5.37908	2.1336	0.144102	0.22791	-1.21727	5.37908	15.3429	8.96556e-05	0.000330693	-1.59409	5.37908	24.1179	9.06144e-07	4.0695e-06	-1.1537	5.37908	12.559	0.000394299	0.00554238
sll7090	-1.10853	5.23756	6.23684	0.012512	0.0312909	-1.72953	5.23756	14.4509	0.000143861	0.000508289	-1.81237	5.23756	15.3649	8.86204e-05	0.000274571	-0.703846	5.23756	2.35597	0.124804	0.349948
sll7106	0.78449	2.87354	2.32833	0.127038	0.206452	0.383205	2.87354	0.529939	0.466632	0.566625	0.237465	2.87354	0.186383	0.665945	0.725855	-0.547024	2.87354	1.05981	0.303258	0.5755
sll8001	0.968483	7.1787	13.512	0.000237047	0.00100613	1.13019	7.1787	18.3267	1.86085e-05	8.06701e-05	1.29711	7.1787	23.8193	1.05816e-06	4.64933e-06	0.328622	7.1787	1.6009	0.205776	0.462493
sll8002	2.70953	4.68449	38.2276	6.29561e-10	1.12318e-08	3.36168	4.68449	59.1918	1.43025e-14	3.49175e-13	3.36555	4.68449	58.127	2.45736e-14	3.21735e-13	0.656019	4.68449	3.09208	0.0786742	0.266655
sll8004	3.02313	4.52739	60.3087	8.10897e-15	4.78724e-13	3.36288	4.52739	76.1936	2.57178e-18	1.1598e-16	3.4919	4.52739	80.1127	3.53644e-19	9.73121e-18	0.468764	4.52739	2.26947	0.131945	0.361847
sll8006	1.93163	8.73318	27.7915	1.35121e-07	1.41986e-06	2.07294	8.73318	31.7139	1.78635e-08	1.44415e-07	2.29969	8.73318	38.3978	5.76988e-10	4.23864e-09	0.36806	8.73318	1.08614	0.297329	0.569326
sll8007	2.88887	6.84556	79.6848	4.39161e-19	5.70383e-17	3.05134	6.84556	88.1849	5.96128e-21	4.11836e-19	3.40374	6.84556	107.054	4.33235e-25	2.38426e-23	0.514875	6.84556	3.12844	0.0769375	0.263797
sll8009	0.593621	3.88175	2.45859	0.116883	0.193042	0.826633	3.88175	4.83238	0.02793	0.0523607	0.751699	3.88175	3.74907	0.0528368	0.0847215	0.158078	3.88175	0.175352	0.675398	0.862375
sll8011	0.965053	4.21426	8.21555	0.0041533	0.0120732	1.52271	4.21426	21.3422	3.84186e-06	1.92508e-05	1.56817	4.21426	21.5993	3.3597e-06	1.34181e-05	0.603116	4.21426	3.61133	0.0573871	0.225043
sll8012	0.527871	3.7412	1.7957	0.180234	0.273467	0.824497	3.7412	4.49098	0.0340742	0.0622266	0.322171	3.7412	0.61572	0.432642	0.510709	-0.205701	3.7412	0.262991	0.608073	0.82096
sll8017	0.165219	5.41935	0.237404	0.626087	0.720889	0.0266496	5.41935	0.00614112	0.937537	0.956088	-0.483558	5.41935	1.90913	0.16706	0.229557	-0.648778	5.41935	3.44174	0.0635688	0.236068
sll8018	1.41554	7.86975	28.6708	8.57878e-08	9.47459e-07	1.29474	7.86975	24.0645	9.31607e-07	5.44052e-06	1.28126	7.86975	23.4248	1.29893e-06	5.59366e-06	-0.134278	7.86975	0.269756	0.603495	0.816139
sll8019	-0.68546	3.87029	3.39227	0.0655028	0.121588	-0.563656	3.87029	2.30457	0.128994	0.194992	-0.778706	3.87029	4.02269	0.0448921	0.0733591	-0.0932457	3.87029	0.05448	0.815443	0.933756
sll8020	0.594368	2.93005	2.23007	0.135347	0.217131	0.569596	2.93005	2.02414	0.154816	0.227563	0.615582	2.93005	2.15377	0.14222	0.201478	0.0212134	2.93005	0.00279263	0.957855	0.987351
sll8027	0.366173	4.52625	1.03876	0.308109	0.422301	0.488128	4.52625	1.85225	0.173522	0.250969	0.432746	4.52625	1.397	0.237227	0.30848	0.0665731	4.52625	0.0337642	0.854209	0.947921
sll8031	-0.391066	2.2094	0.516327	0.472413	0.586138	-0.329568	2.2094	0.371792	0.542029	0.636287	-0.605348	2.2094	1.07181	0.300536	0.37721	-0.214282	2.2094	0.126012	0.722603	0.886657
sll8034	0.410867	3.32797	0.938494	0.332665	0.447088	0.832691	3.32797	4.02443	0.0448459	0.0789667	0.614698	3.32797	1.98931	0.158413	0.219534	0.20383	3.32797	0.228672	0.63251	0.836904
sll8040	1.14248	3.85707	9.29312	0.00230016	0.00736551	0.810755	3.85707	4.53656	0.0331782	0.0608987	0.749315	3.85707	3.61854	0.057139	0.0907682	-0.393162	3.85707	1.11058	0.291956	0.564281
sll8048	-0.123317	3.47513	0.0967014	0.755825	0.827432	-0.0393604	3.47513	0.00991052	0.9207	0.943176	-0.252831	3.47513	0.367063	0.54461	0.616824	-0.129514	3.47513	0.0948453	0.758105	0.902948
sll8049	0.648043	5.13159	3.62906	0.0567787	0.107813	1.01162	5.13159	8.92555	0.00281209	0.00705268	1.13692	5.13159	10.9854	0.000918333	0.00228143	0.48888	5.13159	2.12928	0.144508	0.381169
slr0001	0.832367	7.10014	11.1968	0.000819365	0.003013	0.79549	7.10014	10.2215	0.00138809	0.00376851	0.729928	7.10014	8.48601	0.00357887	0.00774706	-0.102439	7.10014	0.171585	0.678707	0.863205
slr0006	0.240548	7.9586	0.970962	0.32444	0.440041	0.177082	7.9586	0.525862	0.468352	0.567439	0.0473725	7.9586	0.0372615	0.846934	0.879154	-0.193175	7.9586	0.620421	0.430891	0.699549
slr0007	0.0754262	6.73085	0.0635179	0.80102	0.86009	-0.117464	6.73085	0.153241	0.695457	0.76663	-0.443716	6.73085	2.13099	0.144348	0.204136	-0.519143	6.73085	2.91255	0.0878927	0.285102
slr0008	0.925369	8.16292	13.7358	0.000210404	0.000908488	1.22495	8.16292	23.8687	1.03138e-06	5.97341e-06	1.58435	8.16292	39.2054	3.81492e-10	2.90094e-09	0.658986	8.16292	7.10974	0.00766662	0.0542342
slr0009	-1.08899	10.7986	7.41922	0.00645307	0.0176373	-1.65004	10.7986	16.552	4.73331e-05	0.000186744	-2.07276	10.7986	25.3916	4.67961e-07	2.1926e-06	-0.983771	10.7986	6.06608	0.0137803	0.0836346
slr0011	-0.966362	8.72452	10.7148	0.00106281	0.00377567	-1.57774	8.72452	27.6575	1.44809e-07	1.00042e-06	-2.1611	8.72452	49.5302	1.9534e-12	1.93375e-11	-1.19474	8.72452	15.9134	6.63089e-05	0.00143537
slr0012	-1.01476	8.58504	11.5985	0.000660059	0.00248344	-1.54612	8.58504	26.1872	3.09869e-07	1.95368e-06	-2.33772	8.58504	56.1249	6.80114e-14	8.2709e-13	-1.32296	8.58504	19.0001	1.3071e-05	0.000408092
slr0013	-0.989524	5.02929	10.4552	0.00122306	0.00427019	-1.12101	5.02929	13.2445	0.00027338	0.000887663	-1.22363	5.02929	14.8673	0.000115346	0.000349047	-0.234103	5.02929	0.521952	0.47001	0.727068
slr0014	-0.653861	4.27447	3.94624	0.0469763	0.0924998	-1.05096	4.27447	9.71588	0.00182683	0.00482253	-0.889518	4.27447	6.70743	0.00960118	0.0188141	-0.235657	4.27447	0.448595	0.503003	0.750778
slr0015	-0.461504	5.24855	2.39103	0.122033	0.19992	-0.971786	5.24855	10.178	0.00142129	0.00383953	-0.911462	5.24855	8.59647	0.00336815	0.00735206	-0.449958	5.24855	2.06009	0.151202	0.389711
slr0016	-0.203688	3.74643	0.310737	0.577228	0.679099	-0.563563	3.74643	2.2783	0.131195	0.197859	-0.815573	3.74643	4.28655	0.038415	0.0643606	-0.611885	3.74643	2.35809	0.124635	0.349774
slr0017	0.627098	9.39972	5.74395	0.0165456	0.0395899	0.469397	9.39972	3.22671	0.072446	0.119711	0.0212629	9.39972	0.00661572	0.935174	0.947429	-0.605835	9.39972	5.34537	0.0207773	0.11244
slr0018	-0.528198	2.80135	1.80365	0.179272	0.272261	-1.34491	2.80135	10.1779	0.00142135	0.00383953	-1.49637	2.80135	10.55	0.00116187	0.00282169	-0.968169	2.80135	4.08129	0.0433605	0.191293
slr0019	-0.411524	3.78382	1.39571	0.237444	0.344187	-0.253197	3.78382	0.536301	0.46397	0.564024	-0.85213	3.78382	5.12837	0.0235379	0.0416045	-0.440605	3.78382	1.31106	0.252204	0.521565
slr0020	0.490163	5.46394	2.20238	0.137798	0.22033	0.550649	5.46394	2.77592	0.0956915	0.151566	0.787062	5.46394	5.56179	0.0183567	0.0334104	0.296899	5.46394	0.810765	0.367894	0.645776
slr0021	-0.753587	3.29277	5.10286	0.0238864	0.0534521	-0.925633	3.29277	7.47782	0.00624635	0.0141042	-0.908362	3.29277	6.35187	0.0117258	0.0224226	-0.154775	3.29277	0.163225	0.686204	0.867694
slr0022	0.887497	4.35411	5.66284	0.0173281	0.0410388	0.700507	4.35411	3.49313	0.0616241	0.104053	0.579564	4.35411	2.29271	0.129983	0.186091	-0.307933	4.35411	0.68595	0.407545	0.68095
slr0023	-0.45889	2.83527	1.36677	0.242368	0.349764	-0.859596	2.83527	4.41328	0.0356603	0.0647952	-0.913691	2.83527	4.41141	0.0356994	0.0603729	-0.454802	2.83527	1.01352	0.314062	0.588096
slr0031	1.00786	7.24244	13.0647	0.000300916	0.0012431	1.3226	7.24244	22.3185	2.30975e-06	1.23351e-05	1.58327	7.24244	31.5191	1.97488e-08	1.15539e-07	0.575412	7.24244	4.39831	0.0359745	0.170082
slr0032	0.561766	6.60069	4.37284	0.0365161	0.0748062	0.799034	6.60069	8.84677	0.00293608	0.00731655	0.51913	6.60069	3.65801	0.0558002	0.0888588	-0.0426362	6.60069	0.0251464	0.874003	0.954232
slr0033	0.216169	3.30893	0.165021	0.684575	0.771811	-0.139839	3.30893	0.0678287	0.794525	0.845566	-1.1533	3.30893	3.88169	0.0488154	0.078701	-1.36947	3.30893	5.51624	0.0188408	0.105294
slr0036	0.85631	3.62485	5.78808	0.0161352	0.0387508	1.07219	3.62485	9.30841	0.00228104	0.00586889	1.37176	3.62485	14.74	0.000123403	0.000372042	0.515453	3.62485	2.36789	0.123855	0.349094
slr0038	1.22875	6.68964	17.466	2.92488e-05	0.000161151	1.01661	6.68964	11.9796	0.000537876	0.00161562	1.28144	6.68964	18.7634	1.4798e-05	5.28013e-05	0.0526874	6.68964	0.03347	0.854839	0.948168
slr0039	0.561304	5.72608	4.18751	0.040723	0.0820779	0.329003	5.72608	1.42851	0.232007	0.320974	0.573123	5.72608	4.24152	0.0394467	0.0657513	0.0118192	5.72608	0.00185276	0.965667	0.987448
slr0042	-0.190049	4.13546	0.307801	0.579033	0.680217	0.0440249	4.13546	0.0169181	0.896511	0.926495	-1.19146	4.13546	9.83901	0.00170849	0.00399099	-1.00141	4.13546	6.83206	0.00895362	0.06083
slr0043	0.706039	3.74978	3.67895	0.0551034	0.10531	0.876569	3.74978	5.77075	0.0162951	0.0329276	1.08266	3.74978	8.39671	0.00375902	0.00808849	0.37662	3.74978	1.10543	0.293078	0.565505
slr0044	0.060384	2.40414	0.013597	0.907172	0.937794	0.00637009	2.40414	0.00013564	0.990708	0.994075	0.284883	2.40414	0.283585	0.594361	0.663649	0.224499	2.40414	0.176132	0.674719	0.862375
slr0049	0.4318	7.21822	2.54284	0.110795	0.186108	0.561848	7.21822	4.29993	0.0381139	0.0688296	0.687376	7.21822	6.37186	0.0115944	0.0222369	0.255576	7.21822	0.892512	0.344797	0.618396
slr0050	0.764287	5.64496	7.83772	0.00511671	0.0144973	0.920695	5.64496	11.4013	0.000733932	0.00212775	1.27587	5.64496	21.4812	3.57308e-06	1.42179e-05	0.511586	5.64496	3.65806	0.0557985	0.222851
slr0051	0.320871	5.70348	1.24337	0.264823	0.375986	0.261745	5.70348	0.824081	0.36399	0.462031	0.303289	5.70348	1.07921	0.298875	0.376057	-0.0175815	5.70348	0.00366621	0.951718	0.985335
slr0053	0.720295	6.86909	6.48952	0.0108512	0.0276345	1.07578	6.86909	14.4083	0.000147151	0.000518219	1.37328	6.86909	23.1244	1.51849e-06	6.43673e-06	0.652985	6.86909	5.43986	0.0196822	0.108319
slr0054	0.380487	6.31439	1.93841	0.163841	0.252608	0.654252	6.31439	5.75106	0.0164787	0.0332124	0.559855	6.31439	4.12883	0.0421585	0.0694867	0.179368	6.31439	0.430314	0.511835	0.758525
slr0055	0.304598	4.28607	0.741219	0.389271	0.50337	0.69666	4.28607	3.99325	0.0456828	0.0801362	1.05621	4.28607	8.93261	0.00280124	0.00625128	0.751612	4.28607	4.65145	0.0310273	0.154045
slr0056	-0.185255	7.23247	0.42716	0.513386	0.622466	-0.216234	7.23247	0.580462	0.446131	0.546637	-0.398683	7.23247	1.94208	0.163443	0.225542	-0.213429	7.23247	0.555665	0.456012	0.717727
slr0058	0.304245	6.42919	0.538278	0.463147	0.57729	0.470503	6.42919	1.2886	0.256306	0.349028	0.644573	6.42919	2.39691	0.121575	0.176138	0.340328	6.42919	0.673903	0.411694	0.685875
slr0059	1.20745	4.72114	5.63033	0.0176523	0.0416852	1.36813	4.72114	7.23678	0.00714251	0.0158848	1.57146	4.72114	9.37291	0.00220216	0.00503196	0.364006	4.72114	0.541035	0.462004	0.721584
slr0060	0.608712	5.39918	3.62049	0.057072	0.108307	0.377663	5.39918	1.37744	0.240538	0.331083	0.572267	5.39918	3.09583	0.0784929	0.120163	-0.0364449	5.39918	0.0129107	0.909535	0.967014
slr0061	0.223657	2.81539	0.238358	0.625395	0.720602	0.745771	2.81539	2.84598	0.0916029	0.14616	0.342635	2.81539	0.508128	0.47595	0.550752	0.118977	2.81539	0.0626462	0.802361	0.928132
slr0063	1.54155	7.7086	29.5764	5.37543e-08	6.34691e-07	1.613	7.7086	32.2812	1.33396e-08	1.10213e-07	1.68875	7.7086	35.0718	3.17764e-09	2.07185e-08	0.147196	7.7086	0.285852	0.592891	0.810235
slr0064	0.959196	6.00286	11.5778	0.000667428	0.00250826	0.998048	6.00286	12.5258	0.000401373	0.00124833	1.10274	6.00286	14.9513	0.000110319	0.000334773	0.143544	6.00286	0.267348	0.605116	0.81765
slr0065	0.364052	2.25457	0.444163	0.50512	0.617052	0.391412	2.25457	0.519894	0.470887	0.569449	1.21748	2.25457	5.1855	0.0227761	0.0404121	0.853423	2.25457	2.67288	0.102071	0.313552
slr0066	-0.335501	3.01475	0.716633	0.397251	0.511854	-0.119375	3.01475	0.0930714	0.760308	0.818541	-0.376324	3.01475	0.795166	0.372542	0.452035	-0.0408232	3.01475	0.00889437	0.924863	0.973592
slr0067	2.04692	8.52573	50.2228	1.37246e-12	4.41227e-11	2.41309	8.52573	68.197	1.47951e-16	5.00414e-15	2.43789	8.52573	69.315	8.39307e-17	1.62216e-15	0.390967	8.52573	2.00262	0.157028	0.398335
slr0069	-0.164487	2.73994	0.155058	0.693747	0.778923	-0.316705	2.73994	0.557862	0.455123	0.555349	0.0230714	2.73994	0.0028749	0.957239	0.964667	0.187558	2.73994	0.181303	0.670256	0.859339
slr0070	-1.27563	3.24469	13.8173	0.000201478	0.000880483	-1.30052	3.24469	14.2442	0.000160556	0.000557566	-1.29212	3.24469	12.3796	0.000434059	0.00116479	-0.0164928	3.24469	0.00165016	0.967597	0.987448
slr0072	-0.0563111	5.18896	0.03837	0.844702	0.891371	0.0110567	5.18896	0.00147907	0.969322	0.977753	0.0859872	5.18896	0.0861522	0.769127	0.81533	0.142298	5.18896	0.234052	0.628536	0.833972
slr0073	0.920766	8.22102	13.4151	0.000249607	0.00105393	1.01251	8.22102	16.176	5.77201e-05	0.000223381	0.725821	8.22102	8.30794	0.00394721	0.00847098	-0.194945	8.22102	0.610432	0.434625	0.703132
slr0074	-0.183118	7.3334	0.137296	0.710984	0.792232	1.76343	7.3334	12.1964	0.000478807	0.00145162	1.91751	7.3334	14.264	0.000158871	0.000468958	2.10063	7.3334	16.8771	3.98789e-05	0.000994121
slr0075	-0.27332	5.81024	0.305612	0.580386	0.681067	1.18733	5.81024	5.77048	0.0162976	0.0329276	1.49124	5.81024	8.95031	0.00277423	0.00620808	1.76456	5.81024	12.2662	0.000461234	0.00626622
slr0076	-0.521118	5.45592	1.76502	0.183999	0.2784	1.11896	5.45592	8.44927	0.0036519	0.00885566	0.84398	5.45592	4.73473	0.0295595	0.0510259	1.3651	5.45592	11.8956	0.000562659	0.00736675
slr0077	-1.02107	4.38091	4.88046	0.0271623	0.0591127	0.058791	4.38091	0.0171973	0.895666	0.926482	-0.559461	4.38091	1.45199	0.22821	0.29903	0.461612	4.38091	0.939956	0.332289	0.608541
slr0078	-0.00298215	4.58028	0.000114339	0.991468	0.99361	-0.00496448	4.58028	0.000316849	0.985798	0.99068	0.225383	4.58028	0.62509	0.429162	0.507831	0.228365	4.58028	0.6372	0.424726	0.697272
slr0079	1.02284	7.78912	8.99785	0.00270297	0.00847975	1.55115	7.78912	20.2968	6.63118e-06	3.18042e-05	2.11389	7.78912	36.4546	1.56267e-09	1.07573e-08	1.09105	7.78912	10.3646	0.00128456	0.0137655
slr0080	-0.131174	4.97272	0.155042	0.693762	0.778923	-0.30207	4.97272	0.810387	0.368006	0.466295	-0.689263	4.97272	3.92077	0.0476931	0.0772752	-0.558089	4.97272	2.55607	0.109871	0.324026
slr0081	2.59704	8.88156	88.557	4.93917e-21	1.00234e-18	2.76749	8.88156	99.3177	2.15077e-23	2.10225e-21	2.39765	8.88156	76.2612	2.48515e-18	6.15977e-17	-0.199383	8.88156	0.594706	0.440605	0.706091
slr0082	0.709353	8.05606	5.47721	0.019266	0.0447472	1.12304	8.05606	13.5879	0.000227643	0.000758887	1.35303	8.05606	19.4744	1.01956e-05	3.76621e-05	0.643673	8.05606	4.54817	0.0329539	0.160904
slr0083	-0.293417	7.81813	1.05411	0.304562	0.419343	-0.587647	7.81813	4.19544	0.0405328	0.0725524	-0.50238	7.81813	3.04839	0.080817	0.123083	-0.208962	7.81813	0.527824	0.467523	0.725926
slr0084	-0.819848	4.53241	6.04021	0.0139837	0.0345285	-1.17808	4.53241	11.9965	0.000533001	0.00160394	-0.779751	4.53241	5.21117	0.0224422	0.0399068	0.0400967	4.53241	0.0131495	0.908706	0.966765
slr0086	-1.17895	3.47318	10.7123	0.00106428	0.00377676	-1.32198	3.47318	13.1078	0.000294072	0.000945399	-1.24549	3.47318	10.6963	0.00107351	0.00262674	-0.0665397	3.47318	0.0266314	0.870368	0.952225
slr0088	-1.14955	2.77309	6.75807	0.00933245	0.0242226	-1.02877	2.77309	5.5416	0.0185696	0.0367656	-1.3498	2.77309	8.01637	0.00463565	0.00979945	-0.200247	2.77309	0.150829	0.697745	0.875454
slr0089	0.231077	4.39244	0.585067	0.444333	0.558556	0.162619	4.39244	0.288628	0.591101	0.675811	0.0788723	4.39244	0.0624797	0.802619	0.843672	-0.152205	4.39244	0.236481	0.626759	0.83371
slr0090	-1.09088	2.28613	3.23464	0.072096	0.131073	-1.59508	2.28613	6.30285	0.0120544	0.0251386	-1.26213	2.28613	3.88292	0.0487798	0.0786825	-0.171253	2.28613	0.0647957	0.799071	0.927723
slr0091	-0.360826	2.46001	0.638713	0.424177	0.538851	-0.47387	2.46001	1.07684	0.299406	0.395192	-0.390144	2.46001	0.651007	0.419753	0.499977	-0.0293181	2.46001	0.00348004	0.952959	0.985335
slr0093	2.08856	6.05864	35.1644	3.03007e-09	4.73011e-08	2.51795	6.05864	50.5844	1.14148e-12	1.97148e-11	3.17007	6.05864	77.4573	1.35624e-18	3.4404e-17	1.08151	6.05864	10.9962	0.000912967	0.0107018
slr0095	-0.107749	2.99465	0.0704746	0.790647	0.853175	0.510237	2.99465	1.78627	0.181381	0.260825	1.20156	2.99465	10.148	0.00144458	0.00342877	1.30931	2.99465	11.6407	0.000645252	0.00812067
slr0096	-0.134161	4.80675	0.231478	0.63043	0.724861	-0.275233	4.80675	0.961443	0.326824	0.423462	-0.0578687	4.80675	0.0407779	0.839967	0.873475	0.0762919	4.80675	0.0697429	0.791711	0.924375
slr0099	0.816523	3.25154	2.04735	0.152471	0.237503	0.0476962	3.25154	0.00651231	0.935681	0.954795	0.830226	3.25154	2.03576	0.153637	0.214011	0.0137031	3.25154	0.000579168	0.9808	0.992227
slr0103	-0.293785	4.86646	0.275879	0.599415	0.698153	0.11385	4.86646	0.0419194	0.837774	0.881196	0.0442942	4.86646	0.00625375	0.936968	0.948064	0.338079	4.86646	0.361133	0.547878	0.780953
slr0104	0.31299	5.87193	1.25838	0.261958	0.373061	0.45977	5.87193	2.72897	0.0985428	0.155249	0.77354	5.87193	7.58927	0.00587167	0.012105	0.46055	5.87193	2.73284	0.098304	0.306327
slr0105	0.122695	6.6248	0.0691675	0.792553	0.854267	0.373352	6.6248	0.639376	0.423937	0.52459	0.519794	6.6248	1.23226	0.266969	0.340207	0.397099	6.6248	0.721032	0.395806	0.671113
slr0106	0.701901	6.37852	3.95554	0.0467173	0.0920456	0.821742	6.37852	5.40156	0.0201187	0.0395432	1.20503	6.37852	11.453	0.000713793	0.00181779	0.503127	6.37852	2.06263	0.150949	0.389711
slr0108	-0.161127	3.66762	0.194346	0.659324	0.75064	0.0372022	3.66762	0.0105266	0.918281	0.942184	-0.209318	3.66762	0.301845	0.582728	0.652904	-0.0481903	3.66762	0.0155963	0.900614	0.962587
slr0109	-0.479442	2.01868	1.06972	0.301008	0.415436	-0.907511	2.01868	3.47904	0.0621506	0.104778	-0.592848	2.01868	1.36602	0.242497	0.314075	-0.113406	2.01868	0.0446726	0.832607	0.942963
slr0110	-0.20661	3.78129	0.35425	0.551717	0.657645	-0.171885	3.78129	0.246566	0.619503	0.699905	-0.53907	3.78129	2.12585	0.144833	0.204644	-0.33246	3.78129	0.786983	0.375014	0.655719
slr0111	-0.545702	2.67438	1.54743	0.213515	0.315128	-1.03126	2.67438	5.11207	0.02376	0.045706	-0.694338	2.67438	2.19127	0.138795	0.197229	-0.148636	2.67438	0.0926844	0.760792	0.904074
slr0112	-0.876362	4.8155	5.26228	0.0217925	0.0496215	-0.706948	4.8155	3.46993	0.062494	0.105303	-0.958645	4.8155	6.01806	0.0141602	0.0266012	-0.0822822	4.8155	0.0431826	0.835382	0.943851
slr0114	0.341601	5.83169	1.33129	0.248576	0.356977	0.322225	5.83169	1.17972	0.277414	0.373295	0.148448	5.83169	0.242276	0.622567	0.688748	-0.193153	5.83169	0.414418	0.519736	0.765801
slr0115	-0.788044	4.15787	3.55684	0.0593004	0.111687	-0.385098	4.15787	0.876043	0.349288	0.447039	0.0562226	4.15787	0.018584	0.891566	0.915822	0.844267	4.15787	3.94363	0.0470493	0.201542
slr0116	-1.5833	3.91671	22.1206	2.56049e-06	1.92452e-05	-1.75802	3.91671	26.4505	2.70382e-07	1.74886e-06	-0.702973	3.91671	4.54831	0.0329513	0.0561643	0.880331	3.91671	5.96814	0.0145666	0.0872652
slr0118	0.386859	8.67897	1.89613	0.168512	0.258704	0.12038	8.67897	0.183787	0.668139	0.744491	-0.277988	8.67897	0.971702	0.324256	0.401701	-0.664847	8.67897	5.5292	0.0187017	0.104878
slr0119	-0.224394	3.4485	0.434771	0.509657	0.620517	-1.62953	3.4485	18.3591	1.82942e-05	7.96262e-05	-2.02094	3.4485	22.8129	1.78567e-06	7.47175e-06	-1.79655	3.4485	17.5384	2.81562e-05	0.000743278
slr0120	-0.492926	2.29908	1.21463	0.270417	0.381758	-0.945109	2.29908	4.11735	0.0424454	0.0752294	-1.22586	2.29908	5.55289	0.0184502	0.0335617	-0.732937	2.29908	1.81031	0.178471	0.427307
slr0121	-0.0189896	5.12993	0.00144289	0.969699	0.978942	0.0916111	5.12993	0.033709	0.854327	0.89455	-0.31624	5.12993	0.391218	0.53166	0.604447	-0.29725	5.12993	0.345289	0.556792	0.787072
slr0143	0.631168	6.32733	4.93027	0.0263901	0.0576253	0.863047	6.32733	9.23249	0.00237757	0.00607873	1.16395	6.32733	16.5354	4.77502e-05	0.000157087	0.532783	6.32733	3.58871	0.0581734	0.226757
slr0144	0.966714	9.62472	5.86733	0.0154244	0.0373755	0.751034	9.62472	3.56568	0.0589854	0.100328	0.12943	9.62472	0.106796	0.743821	0.79447	-0.837284	9.62472	4.41598	0.0356038	0.169261
slr0145	1.23417	6.83159	6.14793	0.0131566	0.0327174	1.1354	6.83159	5.22403	0.0222768	0.0431323	0.263	6.83159	0.283263	0.59457	0.663654	-0.971174	6.83159	3.83118	0.0503074	0.207558
slr0146	1.60224	5.55079	18.4409	1.75255e-05	0.000102347	1.72941	5.55079	21.4218	3.6856e-06	1.85825e-05	1.00904	5.55079	7.18546	0.00734966	0.0147402	-0.593195	5.55079	2.64855	0.103645	0.315657
slr0147	0.833558	8.27787	4.43435	0.0352227	0.0729389	1.23604	8.27787	9.61539	0.00192954	0.00506485	1.133	8.27787	8.09673	0.00443453	0.00939877	0.299444	8.27787	0.580593	0.44608	0.710359
slr0148	1.56167	7.99534	13.5952	0.000226765	0.000967552	1.50234	7.99534	12.6199	0.000381664	0.0011939	1.00912	7.99534	5.79584	0.0160642	0.0296872	-0.55255	7.99534	1.77359	0.182938	0.433596
slr0149	1.80062	7.94443	16.472	4.93733e-05	0.00025941	1.91952	7.94443	18.5889	1.62158e-05	7.15391e-05	1.43778	7.94443	10.6798	0.00108312	0.00264825	-0.36284	7.94443	0.711094	0.399081	0.674202
slr0150	2.39133	8.53101	35.1727	3.01722e-09	4.73011e-08	2.65666	8.53101	42.5702	6.81906e-11	8.48333e-10	2.20509	8.53101	30.2437	3.81031e-08	2.13312e-07	-0.186238	8.53101	0.237636	0.625918	0.833275
slr0151	2.45491	11.0071	74.9506	4.82645e-18	5.22382e-16	2.92779	11.0071	102.673	3.95263e-24	4.75341e-22	2.74229	11.0071	91.4109	1.16732e-21	4.16515e-20	0.287381	11.0071	1.14574	0.284442	0.557046
slr0152	0.159494	5.3662	0.250395	0.616797	0.712212	0.294695	5.3662	0.858148	0.354258	0.452508	0.408963	5.3662	1.60779	0.204802	0.27265	0.249469	5.3662	0.602182	0.437747	0.703397
slr0156	-1.79615	4.72288	34.7058	3.83489e-09	5.7382e-08	-1.9252	4.72288	39.002	4.23378e-10	4.52207e-09	-1.58297	4.72288	25.9889	3.43388e-07	1.67163e-06	0.213184	4.72288	0.421491	0.516194	0.762271
slr0157	-3.32382	2.95135	36.459	1.55913e-09	2.55682e-08	-3.75611	2.95135	42.6911	6.41027e-11	8.03636e-10	-3.12878	2.95135	30.298	3.70515e-08	2.07783e-07	0.195042	2.95135	0.0846847	0.771046	0.910979
slr0161	0.452015	8.07354	2.59585	0.107144	0.180819	0.620609	8.07354	4.88271	0.0271269	0.0511174	0.681068	8.07354	5.8462	0.0156107	0.028948	0.229053	8.07354	0.668595	0.413542	0.687221
slr0162	0.334674	4.68794	1.10541	0.293082	0.406605	0.841268	4.68794	7.20213	0.00728173	0.0161722	0.824206	4.68794	6.64125	0.00996437	0.019432	0.489532	4.68794	2.40734	0.120767	0.342473
slr0163	0.816527	8.01722	6.29408	0.0121142	0.0304213	1.00627	8.01722	9.5082	0.00204556	0.00532634	1.32214	8.01722	16.179	5.76292e-05	0.000186176	0.505614	8.01722	2.44444	0.117942	0.337705
slr0164	1.13599	8.88224	11.7293	0.000615231	0.00233644	1.62068	8.88224	23.3514	1.34948e-06	7.58089e-06	1.57816	8.88224	22.151	2.52031e-06	1.03127e-05	0.442178	8.88224	1.82345	0.176903	0.426388
slr0165	1.61243	9.68381	34.871	3.52293e-09	5.3704e-08	2.02598	9.68381	53.7274	2.30333e-13	4.58829e-12	2.25362	9.68381	65.3971	6.12291e-16	1.01954e-14	0.641191	9.68381	5.78418	0.016171	0.0934294
slr0168	-1.29434	4.78197	17.8997	2.32862e-05	0.000130588	-1.60732	4.78197	26.6472	2.44206e-07	1.60189e-06	-2.18245	4.78197	42.2134	8.1839e-11	6.76161e-10	-0.888114	4.78197	6.62329	0.0100654	0.0662927
slr0169	-0.987871	5.16239	10.0206	0.00154801	0.00524055	-1.41031	5.16239	19.6558	9.27203e-06	4.3009e-05	-2.15675	5.16239	39.7665	2.86212e-10	2.21269e-09	-1.16888	5.16239	11.493	0.000698589	0.00869088
slr0171	-1.3799	4.84899	18.5064	1.69336e-05	9.9248e-05	-1.47458	4.84899	20.798	5.10368e-06	2.49949e-05	-1.6518	4.84899	24.188	8.73747e-07	3.92944e-06	-0.271909	4.84899	0.619985	0.431053	0.699549
slr0172	-0.0881685	5.6643	0.0635726	0.800936	0.86009	0.108994	5.6643	0.097771	0.754521	0.81393	0.702284	5.6643	4.03873	0.0444673	0.0727748	0.790453	5.6643	5.07299	0.0243015	0.125423
slr0179	-0.704275	5.60048	1.71763	0.189999	0.285701	-1.00388	5.60048	3.43173	0.0639552	0.107541	-0.707702	5.60048	1.71244	0.190669	0.256676	-0.0034269	5.60048	4.03273e-05	0.994933	0.997976
slr0181	1.10432	6.31291	16.7144	4.34498e-05	0.000229401	1.0183	6.31291	14.1773	0.000166362	0.000574046	0.979841	6.31291	12.9035	0.000327972	0.000900191	-0.124478	6.31291	0.219137	0.639698	0.842979
slr0184	0.513804	4.78224	3.52699	0.0603774	0.113321	0.777434	4.78224	8.23987	0.004098	0.00978411	1.00851	4.78224	13.3649	0.000256384	0.000719514	0.494703	4.78224	3.38916	0.0656265	0.239695
slr0185	0.206331	3.99959	0.277929	0.598062	0.697273	0.681563	3.99959	3.13262	0.0767402	0.125656	0.843673	3.99959	4.60404	0.0318967	0.0547113	0.637342	3.99959	2.67066	0.102214	0.313694
slr0186	-0.0737135	8.86132	0.0716153	0.788999	0.851712	0.0169242	8.86132	0.00377475	0.95101	0.964375	0.0379786	8.86132	0.0189439	0.890528	0.915045	0.111692	8.86132	0.163715	0.685759	0.867694
slr0191	-0.0860439	6.02032	0.105131	0.745757	0.818896	-0.179548	6.02032	0.454301	0.5003	0.597233	-0.0951724	6.02032	0.124697	0.723995	0.777385	-0.00912852	6.02032	0.00114088	0.973055	0.990442
slr0192	-0.763806	2.81827	3.82964	0.0503536	0.0977276	-1.02491	2.81827	6.57006	0.0103708	0.0219948	-0.744222	2.81827	3.21481	0.0729748	0.112618	0.0195838	2.81827	0.00195921	0.964695	0.987448
slr0193	1.05983	7.30641	15.8969	6.68867e-05	0.000338816	1.18505	7.30641	19.8137	8.53707e-06	3.97703e-05	1.26282	7.30641	22.2671	2.37241e-06	9.78806e-06	0.202993	7.30641	0.602709	0.437546	0.703397
slr0194	1.46127	6.40781	21.3728	3.781e-06	2.72215e-05	1.62617	6.40781	26.3371	2.86732e-07	1.82727e-06	1.54174	6.40781	23.4174	1.30392e-06	5.60773e-06	0.0804676	6.40781	0.0688073	0.793081	0.924645
slr0195	0.781318	3.12962	2.3301	0.126893	0.206321	1.48179	3.12962	8.90333	0.00284651	0.00712066	1.63294	3.12962	10.4576	0.00122146	0.00295757	0.851624	3.12962	3.13696	0.0765365	0.262958
slr0196	-0.241219	2.47324	0.201945	0.653155	0.745709	-0.152752	2.47324	0.0824342	0.774025	0.828912	-0.2171	2.47324	0.150207	0.698338	0.755331	0.0241195	2.47324	0.00181812	0.965989	0.987448
slr0197	0.475032	4.59276	2.74866	0.0973362	0.166693	0.572139	4.59276	4.02262	0.0448938	0.0790054	0.358249	4.59276	1.44573	0.229214	0.300105	-0.116783	4.59276	0.159947	0.689205	0.869405
slr0199	-0.609829	4.4816	2.01857	0.155385	0.240943	-0.2217	4.4816	0.271903	0.602058	0.684722	0.0854913	4.4816	0.0399624	0.841554	0.874688	0.69532	4.4816	2.54872	0.110384	0.325242
slr0201	-0.276383	5.08472	0.668873	0.413445	0.527487	-0.0255262	5.08472	0.00576865	0.939458	0.957412	-0.128396	5.08472	0.140465	0.707819	0.764313	0.147987	5.08472	0.18402	0.667941	0.858022
slr0207	1.07448	6.21769	14.2103	0.000163474	0.000735178	1.34199	6.21769	22.1188	2.56289e-06	1.34438e-05	1.54166	6.21769	28.6901	8.4938e-08	4.48445e-07	0.467185	6.21769	2.83003	0.0925169	0.293936
slr0208	-0.592424	5.30174	3.83695	0.0501347	0.0974192	-0.572108	5.30174	3.56962	0.0588457	0.100248	-0.261915	5.30174	0.739731	0.389747	0.469402	0.330509	5.30174	1.14083	0.285477	0.558064
slr0209	-1.36004	4.81434	19.0307	1.28633e-05	7.88059e-05	-1.32435	4.81434	17.9711	2.24287e-05	9.56976e-05	-0.808205	4.81434	6.72291	0.00951823	0.0186854	0.551839	4.81434	2.86561	0.0904912	0.290916
slr0210	0.933911	5.19435	8.33925	0.00387977	0.0114533	1.31875	5.19435	16.7132	4.34767e-05	0.000173001	1.27686	5.19435	15.2384	9.47575e-05	0.000292469	0.342951	5.19435	1.18282	0.276782	0.549807
slr0211	0.9564	9.53302	15.1008	0.000101918	0.000490265	1.21847	9.53302	24.2764	8.34569e-07	4.92699e-06	1.58224	9.53302	40.1849	2.3103e-10	1.81635e-09	0.625843	9.53302	6.56334	0.0104101	0.0675238
slr0212	-0.0148681	7.32658	0.00349959	0.952827	0.96733	-0.180374	7.32658	0.512837	0.473913	0.572043	-0.0672812	7.32658	0.0706641	0.790372	0.834039	-0.052413	7.32658	0.0428201	0.836064	0.943851
slr0213	-0.665725	6.26586	3.43584	0.063796	0.119049	-0.973474	6.26586	7.24364	0.00711527	0.015835	-1.74173	6.26586	21.5364	3.47178e-06	1.38317e-05	-1.07601	6.26586	8.36244	0.00383055	0.031568
slr0214	-0.95074	2.57961	3.6716	0.0553472	0.105589	-2.44137	2.57961	18.9172	1.36518e-05	6.10569e-05	-1.66349	2.57961	9.17148	0.00245816	0.00556989	-0.712753	2.57961	1.53676	0.2151	0.476094
slr0216	-0.444089	2.57223	0.828983	0.362567	0.477588	-0.660416	2.57223	1.77696	0.182523	0.261777	-0.415869	2.57223	0.668592	0.413543	0.494212	0.0282199	2.57223	0.00296479	0.956577	0.98666
slr0217	0.0988947	5.87098	0.156917	0.692011	0.778278	-0.185678	5.87098	0.54451	0.46057	0.560941	-0.401248	5.87098	2.41441	0.120223	0.174582	-0.500143	5.87098	3.75289	0.0527163	0.21423
slr0220	-1.10013	5.68888	16.1731	5.78088e-05	0.00029937	-0.952185	5.68888	12.2516	0.000464859	0.00141594	-0.914367	5.68888	10.9181	0.000952313	0.00235863	0.185764	5.68888	0.431812	0.511101	0.758073
slr0222	0.826057	7.39529	5.35758	0.0206324	0.0473451	0.871092	7.39529	5.94615	0.0147494	0.0301455	1.35303	7.39529	14.0758	0.000175592	0.000509059	0.526974	7.39529	2.21139	0.136995	0.369147
slr0224	0.829082	4.90179	3.27784	0.0702212	0.128403	0.520789	4.90179	1.28406	0.257145	0.34979	0.57248	4.90179	1.52177	0.217352	0.286421	-0.256602	4.90179	0.314484	0.574941	0.798556
slr0226	2.37201	10.6571	57.3806	3.59126e-14	1.74042e-12	2.96618	10.6571	85.6275	2.17236e-20	1.30623e-18	3.26776	10.6571	101.255	8.0874e-24	3.86173e-22	0.895749	10.6571	8.95762	0.00276315	0.0243803
slr0228	-0.393621	9.42716	2.16697	0.141004	0.223882	0.0941608	9.42716	0.12457	0.72413	0.7914	0.128603	9.42716	0.231795	0.630196	0.695529	0.522224	9.42716	3.79656	0.0513581	0.210555
slr0229	-0.795439	3.00605	5.49152	0.0191089	0.0444778	-0.469246	3.00605	2.03455	0.15376	0.226216	-1.37746	3.00605	12.2311	0.000470007	0.00125091	-0.582023	3.00605	1.86095	0.172515	0.420538
slr0232	2.41054	4.86863	47.2985	6.09598e-12	1.68246e-10	2.705	4.86863	59.9722	9.62067e-15	2.3846e-13	2.95107	4.86863	70.0722	5.71724e-17	1.16024e-15	0.540523	4.86863	3.19471	0.073877	0.258568
slr0233	2.16411	8.05263	42.1354	8.51683e-11	1.88124e-09	2.59319	8.05263	58.8483	1.70305e-14	4.09614e-13	2.64466	8.05263	60.8291	6.22516e-15	9.06417e-14	0.480549	8.05263	2.29578	0.129726	0.358655
slr0236	1.27238	7.49621	19.8324	8.45394e-06	5.50099e-05	1.49452	7.49621	27.1277	1.90451e-07	1.28298e-06	1.27231	7.49621	19.656	9.27113e-06	3.43646e-05	-7.31953e-05	7.49621	6.93742e-08	0.99979	0.99979
slr0237	0.725352	6.69526	6.82734	0.00897726	0.0234695	0.822638	6.69526	8.77033	0.0030617	0.00760015	0.920188	6.69526	10.8093	0.00100994	0.00248429	0.194836	6.69526	0.499747	0.479611	0.733191
slr0238	-0.413328	3.82543	1.72226	0.189402	0.284981	-0.280411	3.82543	0.804765	0.369673	0.467781	-0.0445507	3.82543	0.0192338	0.889698	0.914482	0.368777	3.82543	1.23722	0.266008	0.53882
slr0239	0.188162	2.75945	0.145837	0.702545	0.785525	0.506995	2.75945	1.08551	0.297467	0.393432	0.567412	2.75945	1.27119	0.259544	0.331396	0.37925	2.75945	0.576131	0.447833	0.710832
slr0240	1.74767	7.12804	41.4502	1.20912e-10	2.51668e-09	1.93428	7.12804	50.4535	1.22024e-12	2.08533e-11	2.1731	7.12804	62.5366	2.61543e-15	3.96837e-14	0.425433	7.12804	2.68785	0.101116	0.311208
slr0241	0.428248	7.96444	2.31702	0.127965	0.207751	0.692248	7.96444	6.03347	0.0140371	0.0288107	0.860048	7.96444	9.24203	0.00236523	0.00537432	0.4318	7.96444	2.36133	0.124376	0.349774
slr0242	-0.217942	5.35564	0.621199	0.430602	0.545306	-0.0162477	5.35564	0.00349594	0.952851	0.965639	0.288698	5.35564	1.08226	0.298191	0.375573	0.50664	5.35564	3.2677	0.0706565	0.251008
slr0243	-0.465183	1.88029	0.479637	0.488587	0.602522	-0.226934	1.88029	0.116962	0.732353	0.795392	-0.964671	1.88029	1.70511	0.191621	0.257424	-0.499488	1.88029	0.433084	0.51048	0.7579
slr0244	0.52475	9.265	2.60795	0.106329	0.179818	0.433618	9.265	1.78325	0.18175	0.261125	0.161722	9.265	0.248115	0.618406	0.684626	-0.363027	9.265	1.24907	0.26373	0.536103
slr0245	1.14844	5.25847	11.8095	0.000589277	0.00224312	1.39558	5.25847	17.4722	2.91541e-05	0.00012101	0.859646	5.25847	6.384	0.0115153	0.0221114	-0.288789	5.25847	0.768619	0.380645	0.659027
slr0249	2.51226	5.66827	64.4894	9.70554e-16	7.5033e-14	3.15287	5.66827	101.96	5.66562e-24	6.57009e-22	3.27903	5.66827	108.391	2.20641e-25	1.3267e-23	0.766771	5.66827	8.00873	0.00465524	0.036511
slr0250	0.24807	7.25175	0.723802	0.394899	0.509634	0.576517	7.25175	3.90647	0.0481005	0.0838338	0.641422	7.25175	4.79356	0.0285663	0.0494166	0.393352	7.25175	1.81723	0.177643	0.42641
slr0251	0.687834	5.18926	3.7587	0.0525335	0.101292	0.795461	5.18926	5.03149	0.0248905	0.0475969	0.810715	5.18926	5.09481	0.0239975	0.0423248	0.122881	5.18926	0.121285	0.727645	0.889992
slr0252	-0.523437	2.59776	1.42812	0.232071	0.33774	-0.278888	2.59776	0.426168	0.513875	0.610744	-0.0222666	2.59776	0.0025043	0.960088	0.966038	0.501171	2.59776	1.16672	0.280077	0.553749
slr0254	-0.658627	3.24881	2.48973	0.114591	0.190126	-0.71441	3.24881	2.88778	0.0892537	0.142973	-0.426828	3.24881	0.984303	0.321139	0.398448	0.231798	3.24881	0.26858	0.604286	0.816868
slr0257	0.60736	8.71674	5.85014	0.0155758	0.0377044	0.67418	8.71674	7.19888	0.00729491	0.0161904	0.857303	8.71674	11.5445	0.000679491	0.00173862	0.249942	8.71674	0.997608	0.31789	0.592531
slr0260	0.129254	4.90092	0.208908	0.647625	0.740175	0.165932	4.90092	0.345684	0.556567	0.647732	-0.0167735	4.90092	0.0032821	0.954315	0.962545	-0.146027	4.90092	0.250278	0.616879	0.827689
slr0261	-0.808171	6.63229	8.64966	0.00327123	0.00987144	-0.743583	6.63229	7.34311	0.00673202	0.0150855	-1.11383	6.63229	15.7742	7.13686e-05	0.000224951	-0.305655	6.63229	1.18532	0.276275	0.549673
slr0262	-0.345416	4.37261	0.977441	0.322831	0.438408	-0.336195	4.37261	0.917085	0.338241	0.435303	-0.273254	4.37261	0.582506	0.445332	0.522019	0.0721617	4.37261	0.0396051	0.842255	0.944067
slr0263	0.0768585	4.42449	0.0413179	0.838925	0.887197	0.585027	4.42449	2.44502	0.117899	0.181001	0.39723	4.42449	1.07848	0.299039	0.376057	0.320371	4.42449	0.701143	0.4024	0.677414
slr0264	1.45797	5.4277	19.598	9.55692e-06	6.09653e-05	2.10775	5.4277	41.5021	1.17746e-10	1.40044e-09	2.9285	5.4277	78.4171	8.34272e-19	2.22039e-17	1.47053	5.4277	23.3785	1.33059e-06	6.6468e-05
slr0265	0.806103	3.26088	3.85801	0.0495091	0.0965503	0.618832	3.26088	2.21614	0.136574	0.204641	0.597713	3.26088	1.90082	0.167986	0.23044	-0.20839	3.26088	0.254058	0.614232	0.826568
slr0267	-0.788061	2.84516	3.03828	0.0813221	0.144687	-0.847133	2.84516	3.48632	0.0618781	0.104427	-0.0637012	2.84516	0.02023	0.886897	0.911891	0.72436	2.84516	2.34762	0.125475	0.350918
slr0269	1.43268	4.40462	17.5104	2.85733e-05	0.000158054	1.86471	4.40462	30.7646	2.91309e-08	2.28474e-07	2.43723	4.40462	52.3357	4.67801e-13	5.04634e-12	1.00455	4.40462	10.9058	0.00095862	0.0111166
slr0270	1.20165	6.16529	15.8201	6.966e-05	0.00035122	1.74962	6.16529	33.4691	7.24071e-09	6.28625e-08	2.52513	6.16529	67.6479	1.95457e-16	3.44918e-15	1.32348	6.16529	20.8203	5.04465e-06	0.000195
slr0271	4.56312	6.58886	85.6014	2.20118e-20	3.76171e-18	4.96924	6.58886	99.7105	1.76387e-23	1.84751e-21	6.19554	6.58886	144.475	2.79678e-33	5.04508e-31	1.63242	6.58886	16.8663	4.01077e-05	0.000994121
slr0272	3.88158	5.81647	98.1667	3.84608e-23	9.60632e-21	4.73971	5.81647	150.004	1.73047e-34	6.24316e-32	5.75819	5.81647	219.738	1.0316e-49	5.58268e-47	1.87661	5.81647	41.6231	1.10675e-10	2.76432e-08
slr0273	0.772942	6.67034	7.72808	0.00543684	0.0152844	1.65899	6.67034	35.5049	2.54404e-09	2.38054e-08	2.45695	6.67034	75.1195	4.43078e-18	1.06568e-16	1.684	6.67034	37.8134	7.78469e-10	1.099e-07
slr0280	-0.527655	5.6312	4.04823	0.0442176	0.0879747	-0.774413	5.6312	8.5347	0.00348439	0.00849385	-1.01459	5.6312	13.6862	0.000216037	0.000613713	-0.486935	5.6312	3.095	0.0785332	0.266455
slr0284	-0.687664	7.19929	5.44041	0.0196761	0.0455369	-1.44352	7.19929	23.019	1.60405e-06	8.88796e-06	-2.36003	7.19929	56.0158	7.18907e-14	8.64552e-13	-1.67237	7.19929	29.0157	7.17945e-08	5.82792e-06
slr0285	-0.962237	2.65784	3.83371	0.0502317	0.0975493	-0.836364	2.65784	2.93154	0.0868646	0.139899	-0.478795	2.65784	0.924179	0.33638	0.413722	0.483442	2.65784	0.830358	0.362169	0.640741
slr0286	-0.36974	2.80964	0.539086	0.462812	0.57729	-1.39414	2.80964	6.65424	0.00989201	0.0211312	-0.517262	2.80964	0.967753	0.325241	0.402614	-0.147522	2.80964	0.075959	0.78285	0.919318
slr0287	-1.28311	6.1133	22.1286	2.54984e-06	1.92095e-05	-1.45633	6.1133	28.0622	1.1748e-07	8.22105e-07	-1.00392	6.1133	13.4616	0.000243498	0.000686913	0.279191	6.1133	1.00914	0.315108	0.589036
slr0288	0.621068	7.15465	4.33496	0.0373373	0.0760566	0.735596	7.15465	6.06502	0.0137885	0.0283902	0.830283	7.15465	7.65718	0.00565467	0.0117396	0.209215	7.15465	0.496341	0.481112	0.733759
slr0292	1.55267	5.93755	23.0164	1.60629e-06	1.2942e-05	2.37327	5.93755	53.8748	2.13684e-13	4.36372e-12	3.25463	5.93755	97.6757	4.9284e-23	2.1625e-21	1.70195	5.93755	31.7447	1.75824e-08	1.84162e-06
slr0293	-0.0980346	6.00255	0.100793	0.75088	0.823259	0.084881	6.00255	0.0759806	0.78282	0.836674	0.0374583	6.00255	0.0144797	0.904221	0.9256	0.135493	6.00255	0.188435	0.664223	0.858022
slr0294	-0.866979	3.38252	5.04733	0.0246639	0.0548143	-1.06992	3.38252	7.43777	0.00638688	0.0144115	-1.33069	3.38252	10.0233	0.00154571	0.00364482	-0.463708	3.38252	1.11352	0.291319	0.56405
slr0298	1.51515	6.637	9.99469	0.00156992	0.0053044	2.195	6.637	20.2762	6.70302e-06	3.21013e-05	2.26166	6.637	21.3607	3.80488e-06	1.50481e-05	0.746511	6.637	2.5589	0.109675	0.324026
slr0299	1.42232	4.46724	18.7818	1.46561e-05	8.76397e-05	1.64431	4.46724	25.4337	4.57839e-07	2.83162e-06	1.6212	4.46724	23.5393	1.2239e-06	5.30577e-06	0.198871	4.46724	0.417602	0.518136	0.764374
slr0300	1.81261	3.74775	19.799	8.60278e-06	5.57549e-05	1.75627	3.74775	18.4699	1.72609e-05	7.59431e-05	2.08639	3.74775	25.3244	4.84528e-07	2.26369e-06	0.273778	3.74775	0.55384	0.456753	0.718496
slr0301	2.6477	9.9228	55.3166	1.02596e-13	4.11272e-12	2.88936	9.9228	64.6086	9.13541e-16	2.60199e-14	2.1454	9.9228	37.6455	8.48405e-10	6.08117e-09	-0.502292	9.9228	2.24612	0.13395	0.364671
slr0302	0.988403	5.55445	11.1545	0.000838276	0.0030721	1.07204	5.55445	13.1118	0.000293442	0.000945244	0.721928	5.55445	5.72479	0.016727	0.030772	-0.266475	5.55445	0.821499	0.364742	0.642906
slr0303	-0.972571	3.59141	4.99719	0.0253885	0.0560793	-1.37643	3.59141	9.51179	0.00204156	0.00532446	-1.13876	3.59141	6.2652	0.0123132	0.0234218	-0.16619	3.59141	0.125263	0.723395	0.886699
slr0304	-0.816547	4.08118	6.64995	0.00991585	0.0255125	-0.451743	4.08118	2.11781	0.145595	0.216037	-0.760666	4.08118	5.32585	0.0210113	0.0377135	0.0558818	4.08118	0.0262713	0.87124	0.952351
slr0306	0.562574	4.26345	3.7489	0.0528422	0.101767	0.427855	4.26345	2.12942	0.144495	0.214596	0.269576	4.26345	0.768061	0.380818	0.459842	-0.292998	4.26345	0.959823	0.327231	0.602677
slr0309	-0.0774324	5.57283	0.0801253	0.777128	0.842797	-0.234836	5.57283	0.726949	0.393874	0.493787	-0.0913476	5.57283	0.107104	0.743465	0.79447	-0.0139152	5.57283	0.00247094	0.960355	0.987448
slr0311	1.38013	5.76373	21.1613	4.22198e-06	2.99973e-05	1.2284	5.76373	16.7091	4.3572e-05	0.000173168	1.39253	5.76373	21.0478	4.47957e-06	1.74612e-05	0.0124034	5.76373	0.0018216	0.965956	0.987448
slr0312	-0.167959	4.68	0.341879	0.558747	0.663103	-0.15851	4.68	0.302317	0.582433	0.668727	-0.236073	4.68	0.628828	0.427785	0.506941	-0.0681143	4.68	0.0513635	0.820707	0.934471
slr0313	0.656529	4.47762	3.34723	0.0673184	0.124265	0.164566	4.47762	0.203818	0.651657	0.730134	0.282919	4.47762	0.584581	0.444522	0.521447	-0.373609	4.47762	1.05436	0.304505	0.577461
slr0314	-0.633039	3.02644	2.24364	0.134165	0.215873	-0.0791417	3.02644	0.0378388	0.845767	0.888165	-0.0449282	3.02644	0.0112069	0.915691	0.933223	0.588111	3.02644	1.73335	0.187983	0.438808
slr0315	1.09082	3.08021	6.80694	0.00908043	0.0236568	0.9225	3.08021	4.73962	0.0294756	0.0547524	1.6169	3.08021	14.9518	0.000110292	0.000334773	0.526076	3.08021	1.88051	0.170276	0.416917
slr0316	-0.215245	4.41922	0.306354	0.579926	0.680797	-0.281893	4.41922	0.521298	0.470288	0.568937	0.324375	4.41922	0.69263	0.405271	0.486296	0.53962	4.41922	1.88784	0.169446	0.415672
slr0317	1.27668	2.35587	4.42844	0.0353447	0.0731373	0.989598	2.35587	2.58382	0.107961	0.168291	0.861729	2.35587	1.81791	0.177562	0.241086	-0.414946	2.35587	0.490208	0.483834	0.735461
slr0318	-0.46704	2.88899	0.925556	0.33602	0.450486	-0.264343	2.88899	0.305512	0.580447	0.667312	-0.0441425	2.88899	0.00806785	0.928429	0.942154	0.422898	2.88899	0.701341	0.402334	0.677414
slr0319	0.027849	4.09844	0.00513808	0.942856	0.962265	0.470168	4.09844	1.50992	0.219152	0.305927	0.529144	4.09844	1.84086	0.17485	0.238146	0.501295	4.09844	1.64287	0.199932	0.454316
slr0320	0.42654	6.48226	0.747972	0.387119	0.501216	0.587374	6.48226	1.41657	0.233969	0.323362	0.979762	6.48226	3.88975	0.0485817	0.0784409	0.553222	6.48226	1.25898	0.261844	0.533556
slr0321	-0.503335	2.08646	1.29807	0.254566	0.36429	-0.637533	2.08646	2.02066	0.155171	0.227983	-1.73111	2.08646	9.32176	0.00226448	0.00516709	-1.22777	2.08646	4.17932	0.0409202	0.184283
slr0322	0.850936	8.77575	12.7521	0.000355605	0.00143079	0.995195	8.77575	17.3706	3.07545e-05	0.000126565	1.23002	8.77575	26.2305	3.02996e-07	1.48839e-06	0.379086	8.77575	2.57165	0.108794	0.323164
slr0323	-0.6919	6.62497	3.58889	0.058167	0.109999	-0.902757	6.62497	6.03981	0.0139868	0.0287379	-0.789876	6.62497	4.59815	0.0320065	0.0548708	-0.0979759	6.62497	0.0708598	0.790089	0.924271
slr0324	-0.635519	3.24503	2.33695	0.126337	0.205725	-1.88298	3.24503	17.1357	3.48017e-05	0.000141428	-1.67567	3.24503	12.7395	0.000358021	0.000976067	-1.04015	3.24503	4.66432	0.0307956	0.153258
slr0326	0.0481316	5.34404	0.0180383	0.89316	0.929218	0.460723	5.34404	1.66573	0.196831	0.279454	0.568928	5.34404	2.49503	0.114206	0.167075	0.520796	5.34404	2.08856	0.148406	0.387048
slr0327	-1.30157	4.84407	19.9094	8.11991e-06	5.34623e-05	-1.32895	4.84407	20.6829	5.41992e-06	2.6345e-05	-1.19837	4.84407	16.1074	5.98494e-05	0.000192027	0.103201	4.84407	0.110187	0.739932	0.897649
slr0329	-0.935127	2.04654	3.34205	0.0675302	0.124515	-1.10265	2.04654	4.50579	0.0337803	0.0618639	-2.32358	2.04654	12.7347	0.000358938	0.000977746	-1.38846	2.04654	3.88375	0.0487557	0.202961
slr0331	-0.0368868	9.71441	0.0190448	0.890238	0.926989	-0.411479	9.71441	2.35868	0.124588	0.189656	-1.03804	9.71441	14.6697	0.000128089	0.000385097	-1.00115	9.71441	13.6611	0.000218938	0.00357909
slr0333	-0.424229	8.32107	2.23811	0.134646	0.216333	-1.43145	8.32107	24.4172	7.75723e-07	4.63009e-06	-1.94064	8.32107	42.979	5.53301e-11	4.64229e-10	-1.51641	8.32107	26.8083	2.24672e-07	1.4888e-05
slr0334	-0.631253	5.98688	2.53946	0.111033	0.186317	-1.71942	5.98688	17.6294	2.68401e-05	0.000112452	-2.56632	5.98688	35.3033	2.82153e-09	1.8621e-08	-1.93507	5.98688	20.6271	5.57995e-06	0.000208254
slr0335	-0.572259	11.5542	3.22008	0.0727401	0.132096	-0.893266	11.5542	7.77257	0.00530454	0.0121896	-1.304	11.5542	16.2695	5.49422e-05	0.000178755	-0.731743	11.5542	5.23591	0.0221252	0.117386
slr0337	0.615993	5.82181	5.12486	0.0235854	0.0529246	0.606071	5.82181	4.93835	0.026267	0.0497893	0.713275	5.82181	6.68743	0.00970953	0.0190035	0.097282	5.82181	0.128542	0.719949	0.885238
slr0338	-1.16004	5.2345	15.5993	7.82829e-05	0.000388661	-0.991936	5.2345	11.5334	0.000683584	0.00199246	-1.69352	5.2345	29.7199	4.99204e-08	2.73342e-07	-0.533478	5.2345	2.83647	0.0921463	0.293757
slr0341	-0.632119	3.81239	3.96856	0.0463574	0.0914475	-0.700391	3.81239	4.81458	0.0282199	0.0527822	-0.762844	3.81239	5.12837	0.0235378	0.0416045	-0.130726	3.81239	0.139236	0.709042	0.881079
slr0342	0.111703	10.3302	0.144343	0.704001	0.786479	0.109976	10.3302	0.139907	0.708374	0.777583	0.0535633	10.3302	0.0331526	0.855521	0.88552	-0.0581394	10.3302	0.0390611	0.843328	0.944562
slr0343	-0.339525	11.0336	0.962303	0.326607	0.441505	-0.143988	11.0336	0.173416	0.677093	0.752661	-0.277879	11.0336	0.64475	0.421996	0.502089	0.0616457	11.0336	0.0317686	0.858537	0.949774
slr0344	-0.533566	2.51762	1.42756	0.232164	0.33774	-0.962309	2.51762	4.28319	0.0384911	0.0694336	-1.82542	2.51762	11.3836	0.000740969	0.00187816	-1.29185	2.51762	5.26574	0.0217491	0.11558
slr0345	-1.19922	4.65511	14.7558	0.000122372	0.000574193	-1.33142	4.65511	17.9084	2.31796e-05	9.83845e-05	-2.32492	4.65511	44.0591	3.18602e-11	2.75867e-10	-1.1257	4.65511	9.77	0.00177382	0.0174819
slr0346	-0.585997	4.11785	2.70089	0.100292	0.171214	-0.892825	4.11785	6.02667	0.0140913	0.0289036	-1.11841	4.11785	8.61462	0.00333475	0.00728694	-0.53241	4.11785	1.87765	0.170602	0.417126
slr0347	-1.09456	3.25407	7.19854	0.00729629	0.0196125	-0.314046	3.25407	0.659139	0.416864	0.517613	-0.31395	3.25407	0.604871	0.436726	0.51411	0.780615	3.25407	3.20989	0.0731943	0.256947
slr0348	-0.738579	4.92419	4.57614	0.0324202	0.0684005	-0.666336	4.92419	3.73779	0.0531948	0.0917279	-0.629996	4.92419	3.24433	0.0716708	0.11087	0.108583	4.92419	0.0932225	0.76012	0.904056
slr0351	-1.22158	5.02487	9.3993	0.00217069	0.00700619	-1.39974	5.02487	12.1864	0.000481398	0.00145812	-2.18513	5.02487	26.4646	2.68418e-07	1.32859e-06	-0.963547	5.02487	5.17188	0.0229553	0.120414
slr0354	-1.4524	2.57368	5.08388	0.0241493	0.0539661	-0.887314	2.57368	2.03946	0.153264	0.225793	-1.29646	2.57368	3.82374	0.0505313	0.0812252	0.15594	2.57368	0.0497108	0.823567	0.936508
slr0355	1.34448	6.85815	19.3574	1.08397e-05	6.82103e-05	0.801437	6.85815	6.94787	0.00839192	0.0182509	0.943131	6.85815	9.50406	0.00205018	0.0047112	-0.401352	6.85815	1.78209	0.181893	0.432363
slr0356	1.49333	4.91498	18.1897	1.99955e-05	0.000114104	1.51427	4.91498	18.66	1.56225e-05	6.90154e-05	1.76163	4.91498	24.6258	6.9615e-07	3.16582e-06	0.268306	4.91498	0.651007	0.419753	0.694313
slr0357	-0.963361	3.65355	8.73986	0.00311328	0.00950077	-1.03892	3.65355	9.95756	0.00160191	0.0042845	-1.12517	3.65355	10.3791	0.00127447	0.00306988	-0.161811	3.65355	0.190073	0.662856	0.858022
slr0358	-0.266911	6.4038	0.899703	0.342861	0.456258	-0.688547	6.4038	5.87665	0.015343	0.0311757	-1.21229	6.4038	17.2053	3.35491e-05	0.000112768	-0.945375	6.4038	10.4739	0.0012107	0.0132362
slr0359	-0.436987	6.04056	2.52552	0.112018	0.187582	-0.759676	6.04056	7.48282	0.00622905	0.014075	-1.09798	6.04056	14.7096	0.000125404	0.000377375	-0.660995	6.04056	5.30307	0.0212879	0.11444
slr0360	-0.923246	4.96437	11.7423	0.000610945	0.00232288	-0.907245	4.96437	11.3204	0.000766598	0.00220865	-1.65671	4.96437	31.7022	1.79714e-08	1.06097e-07	-0.733462	4.96437	5.88255	0.0152917	0.0901126
slr0361	1.04005	5.04742	9.69288	0.00184983	0.00609788	1.46691	5.04742	19.5992	9.55074e-06	4.41127e-05	2.25501	5.04742	45.5687	1.47381e-11	1.33672e-10	1.21496	5.04742	14.7717	0.00012134	0.00233131
slr0362	-0.304366	3.8046	0.595877	0.440156	0.555023	-0.308735	3.8046	0.614429	0.433125	0.5343	0.204165	3.8046	0.264488	0.607053	0.675266	0.508531	3.8046	1.58763	0.207665	0.464904
slr0363	-0.0456792	4.02757	0.0167304	0.897084	0.932106	-0.144362	4.02757	0.164401	0.685137	0.759003	-0.0192589	4.02757	0.00279488	0.957838	0.964971	0.0264202	4.02757	0.0052469	0.942255	0.982499
slr0364	0.133984	5.89129	0.153679	0.695044	0.779284	-0.255499	5.89129	0.553083	0.457061	0.557504	-0.382576	5.89129	1.20699	0.271929	0.345849	-0.51656	5.89129	2.19835	0.138159	0.370439
slr0366	-0.051145	5.846	0.0266239	0.870386	0.911365	-0.38164	5.846	1.46505	0.226128	0.314314	-0.697805	5.846	4.67519	0.0306014	0.0526285	-0.64666	5.846	4.00557	0.0453503	0.196075
slr0369	-0.285809	8.62891	1.23347	0.266732	0.377851	-0.526206	8.62891	4.15729	0.0414557	0.0738785	-0.882285	8.62891	11.4737	0.000705868	0.00180043	-0.596476	8.62891	5.274	0.0216463	0.115222
slr0370	1.59496	9.00058	38.6841	4.98242e-10	9.192e-09	2.0179	9.00058	60.5215	7.27789e-15	1.86073e-13	2.39619	9.00058	83.1233	7.70902e-20	2.25506e-18	0.801233	9.00058	10.2568	0.00136183	0.0143103
slr0373	0.195981	12.5778	0.229494	0.631899	0.726036	0.465147	12.5778	1.28825	0.25637	0.349028	0.588917	12.5778	2.05956	0.151254	0.211355	0.392936	12.5778	0.920405	0.337369	0.613003
slr0374	1.13639	15.3666	12.201	0.000477638	0.0018708	1.38361	15.3666	17.8779	2.35544e-05	9.98448e-05	1.61712	15.3666	24.1119	9.08981e-07	4.07661e-06	0.480736	15.3666	2.22894	0.135447	0.36673
slr0376	-0.604439	11.8251	2.59614	0.107124	0.180819	-1.00399	11.8251	7.07273	0.00782657	0.0171593	-1.32203	11.8251	12.0879	0.000507508	0.00133974	-0.717593	11.8251	3.64518	0.0562318	0.223482
slr0377	-0.182705	5.32856	0.333386	0.563672	0.666999	-0.420899	5.32856	1.74441	0.186581	0.266885	-0.677204	5.32856	4.25595	0.039113	0.0653628	-0.494499	5.32856	2.25515	0.133171	0.363978
slr0378	-0.613431	4.98433	4.67411	0.0306205	0.0651539	-0.790821	4.98433	7.62446	0.00575818	0.0131206	-0.402182	4.98433	1.95138	0.162438	0.224632	0.211249	4.98433	0.51524	0.472879	0.728785
slr0379	-1.28477	2.22268	5.8988	0.0151512	0.0369339	-0.874342	2.22268	2.92245	0.0873554	0.140487	-2.0498	2.22268	11.1853	0.000824489	0.00206408	-0.765027	2.22268	1.29165	0.255745	0.524575
slr0380	-0.803641	4.78962	6.57379	0.0103492	0.0265432	-1.23782	4.78962	14.8697	0.000115199	0.000416076	-0.848328	4.78962	6.90309	0.00860467	0.017057	-0.0446877	4.78962	0.0183646	0.892204	0.95935
slr0381	-0.152032	4.04471	0.209396	0.647241	0.739997	-0.292006	4.04471	0.758982	0.383647	0.482322	0.121228	4.04471	0.127305	0.721243	0.775199	0.27326	4.04471	0.63427	0.425793	0.697554
slr0383	-0.966447	2.50955	4.44577	0.0349878	0.0726378	-0.969011	2.50955	4.50298	0.0338359	0.0619307	-1.76878	2.50955	11.0466	0.000888503	0.0022124	-0.802337	2.50955	1.96735	0.160729	0.403314
slr0384	-1.15753	4.53036	16.2404	5.57912e-05	0.000289383	-1.17052	4.53036	16.4891	4.89294e-05	0.000192341	-1.8092	4.53036	32.9977	9.22702e-09	5.58958e-08	-0.651671	4.53036	3.91768	0.0477809	0.20217
slr0386	-0.0699946	6.45504	0.0590658	0.807979	0.865273	-0.175542	6.45504	0.36968	0.543179	0.637175	-0.125892	6.45504	0.187363	0.665121	0.725617	-0.0558971	6.45504	0.0368	0.847873	0.946135
slr0387	1.74257	5.65479	29.5631	5.41269e-08	6.36775e-07	1.92831	5.65479	36.1191	1.85615e-09	1.7884e-08	1.98046	5.65479	37.4446	9.4047e-10	6.66748e-09	0.237885	5.65479	0.620434	0.430886	0.699549
slr0388	1.00159	2.99811	5.41559	0.0199577	0.0460572	1.03547	2.99811	5.85115	0.0155669	0.031591	0.802816	2.99811	3.06393	0.0800479	0.122026	-0.198775	2.99811	0.21654	0.641689	0.84389
slr0392	-0.349713	2.58944	0.304036	0.581363	0.681845	-1.23343	2.58944	3.39111	0.0655488	0.10988	-0.738425	2.58944	1.21884	0.269588	0.343141	-0.388712	2.58944	0.330305	0.565479	0.792452
slr0393	0.709014	2.42796	1.36741	0.242257	0.34976	-0.325441	2.42796	0.260702	0.609638	0.691276	-0.658403	2.42796	0.924539	0.336286	0.413722	-1.36742	2.42796	4.1677	0.0412016	0.184722
slr0394	0.0585362	9.49838	0.0539459	0.816334	0.871347	-0.10683	9.49838	0.179457	0.67184	0.747846	-0.250618	9.49838	0.983084	0.321439	0.398667	-0.309154	9.49838	1.49493	0.221453	0.482589
slr0395	0.462789	2.14436	0.808141	0.368671	0.484253	1.13948	2.14436	5.5973	0.0179882	0.0358549	0.807355	2.14436	2.33289	0.126666	0.182308	0.344565	2.14436	0.462967	0.49624	0.743902
slr0397	0.978107	5.81341	12.589	0.000388029	0.00154783	0.967645	5.81341	12.3144	0.000449471	0.00137682	1.01648	5.81341	13.2416	0.000273806	0.000763814	0.0383767	5.81341	0.0200115	0.887505	0.958945
slr0398	0.306376	5.47321	1.17101	0.279194	0.391934	0.276024	5.47321	0.948604	0.330075	0.426653	0.00432214	5.47321	0.000217593	0.988231	0.99006	-0.302054	5.47321	1.08348	0.297921	0.569699
slr0399	0.366743	4.86832	0.997872	0.317826	0.433241	0.693966	4.86832	3.59932	0.0578033	0.0987828	0.819588	4.86832	4.88836	0.0270384	0.0469987	0.452845	4.86832	1.52479	0.216896	0.477496
slr0400	-0.188797	4.05498	0.274251	0.600495	0.698355	-0.320436	4.05498	0.781889	0.376564	0.475021	-0.69957	4.05498	3.33823	0.0676874	0.105309	-0.510774	4.05498	1.75069	0.18579	0.436193
slr0401	-1.19296	4.66981	9.04333	0.00263655	0.00829543	-1.1308	4.66981	8.12261	0.00437166	0.0103536	-1.41704	4.66981	11.9447	0.000548024	0.00143041	-0.224082	4.66981	0.290293	0.590033	0.808524
slr0402	0.70238	3.33205	3.6934	0.054628	0.104586	0.313794	3.33205	0.700715	0.402544	0.502909	0.460981	3.33205	1.41716	0.233871	0.305094	-0.241398	3.33205	0.423621	0.515136	0.761435
slr0404	1.85471	10.9671	36.7028	1.37583e-09	2.27924e-08	1.96661	10.9671	40.9665	1.5486e-10	1.78309e-09	2.03583	10.9671	43.6785	3.87001e-11	3.30682e-10	0.181125	10.9671	0.37357	0.541065	0.778395
slr0406	0.260786	5.30244	0.694397	0.404673	0.518332	0.329449	5.30244	1.11003	0.292075	0.387721	0.112624	5.30244	0.124082	0.724649	0.77783	-0.148163	5.30244	0.21694	0.641381	0.84389
slr0407	0.913531	4.88979	6.52291	0.0106494	0.0271843	0.822289	4.88979	5.24818	0.0219697	0.0426394	0.922822	4.88979	6.43254	0.0112048	0.0215533	0.00929134	4.88979	0.000687237	0.979086	0.992227
slr0408	-0.359254	7.05357	2.1934	0.138603	0.221261	-0.930087	7.05357	14.2999	0.000155872	0.000542461	-1.27421	7.05357	25.6331	4.12887e-07	1.96575e-06	-0.914951	7.05357	13.2689	0.00026984	0.0042245
slr0415	-1.5374	5.06993	25.2362	5.07223e-07	4.62627e-06	-1.58522	5.06993	26.7279	2.3422e-07	1.54576e-06	-1.41199	5.06993	20.5556	5.79236e-06	2.2179e-05	0.125416	5.06993	0.151577	0.697033	0.875454
slr0416	0.201607	3.833	0.35368	0.552037	0.657725	-0.0548653	3.833	0.0253139	0.873587	0.90973	0.136438	3.833	0.148664	0.699815	0.756425	-0.0651684	3.833	0.0343503	0.852964	0.947444
slr0417	0.255373	7.50118	0.811269	0.367745	0.483233	0.214847	7.50118	0.573984	0.44868	0.549553	0.305605	7.50118	1.15217	0.283096	0.358228	0.0502315	7.50118	0.0312512	0.859681	0.949774
slr0418	-0.224431	5.07497	0.429148	0.512408	0.621744	-0.398136	5.07497	1.33596	0.247748	0.339268	-0.164284	5.07497	0.223074	0.636707	0.701285	0.0601471	5.07497	0.0295239	0.863575	0.951061
slr0420	-0.235697	8.4545	0.387082	0.533837	0.640329	-0.0918941	8.4545	0.0589142	0.80822	0.856608	-0.0918775	8.4545	0.0587618	0.808464	0.848443	0.14382	8.4545	0.143766	0.704565	0.878542
slr0421	0.98063	5.25454	12.3832	0.000433215	0.00171125	0.665439	5.25454	5.60288	0.017931	0.0357629	0.834869	5.25454	8.56691	0.00342327	0.00745498	-0.14576	5.25454	0.27938	0.597108	0.812578
slr0423	-1.89955	4.17583	35.6567	2.35341e-09	3.74584e-08	-1.91289	4.17583	35.733	2.26298e-09	2.14224e-08	-1.65805	4.17583	25.8231	3.74182e-07	1.80799e-06	0.241499	4.17583	0.458058	0.498533	0.745961
slr0426	0.043496	7.12985	0.0203138	0.886664	0.924831	0.0738708	7.12985	0.0585311	0.808833	0.856608	-0.0567797	7.12985	0.0341894	0.853304	0.884071	-0.100276	7.12985	0.106552	0.744104	0.898223
slr0427	-0.182492	3.45604	0.348346	0.555051	0.660774	-0.556144	3.45604	3.01831	0.0823292	0.133528	-0.593766	3.45604	2.99691	0.0834237	0.126578	-0.411274	3.45604	1.38601	0.23908	0.505729
slr0431	0.131071	5.5754	0.144216	0.704125	0.786479	-0.048201	5.5754	0.0193716	0.889307	0.92196	-0.535772	5.5754	2.27654	0.131345	0.187875	-0.666843	5.5754	3.52595	0.0604152	0.229705
slr0434	-1.32012	5.63747	19.8693	8.29201e-06	5.41734e-05	-1.16685	5.63747	15.707	7.39506e-05	0.000278882	-1.208	5.63747	16.2321	5.60366e-05	0.000181588	0.112122	5.63747	0.134757	0.71355	0.882964
slr0435	-1.15473	5.77782	10.4788	0.00120749	0.00422037	-0.947623	5.77782	7.13785	0.00754737	0.0166596	-0.710904	5.77782	4.00183	0.045451	0.0741605	0.443829	5.77782	1.51866	0.217823	0.478485
slr0436	0.638809	5.64399	3.8149	0.0507986	0.098356	1.33353	5.64399	16.7981	4.15755e-05	0.00016635	1.72122	5.64399	27.4226	1.6351e-07	8.29559e-07	1.08241	5.64399	11.4335	0.000721307	0.00886283
slr0438	0.275303	5.10256	0.923326	0.336603	0.450568	0.49638	5.10256	3.03468	0.0815028	0.13232	0.605399	5.10256	4.36647	0.0366528	0.06176	0.330097	5.10256	1.32071	0.250464	0.520172
slr0439	-1.12387	4.79225	14.9527	0.00011024	0.00052485	-1.19952	4.79225	16.8326	4.08261e-05	0.000164062	-1.26588	4.79225	17.4515	2.94735e-05	0.000100001	-0.142003	4.79225	0.204451	0.651152	0.851506
slr0440	0.910217	5.513	10.5749	0.00114635	0.00403707	0.859928	5.513	9.38867	0.00218331	0.00563529	0.908785	5.513	10.1838	0.00141681	0.00337271	-0.00143226	5.513	2.69387e-05	0.995859	0.997976
slr0442	2.30198	11.7298	44.6904	2.30786e-11	5.63431e-10	2.86189	11.7298	66.1004	4.28526e-16	1.31266e-14	3.88616	11.7298	111.263	5.18282e-26	3.36572e-24	1.58419	11.7298	22.2649	2.37508e-06	0.00011017
slr0443	-2.98242	2.34304	22.7448	1.85005e-06	1.45845e-05	-2.51459	2.34304	17.9513	2.26632e-05	9.64448e-05	-2.76699	2.34304	18.1445	2.04757e-05	7.1218e-05	0.215431	2.34304	0.0771564	0.781189	0.918031
slr0444	-1.13292	3.79435	7.78368	0.00527203	0.0148467	-1.49904	3.79435	13.0852	0.000297633	0.000954956	-1.91275	3.79435	18.6621	1.5605e-05	5.5437e-05	-0.77983	3.79435	2.92222	0.0873678	0.284252
slr0445	1.05644	6.77828	7.46268	0.00629911	0.0173039	1.46501	6.77828	14.1655	0.000167409	0.000576434	1.11377	6.77828	8.22028	0.00414248	0.00884911	0.0573332	6.77828	0.0225808	0.880552	0.956239
slr0446	-0.229764	3.07089	0.366891	0.544704	0.650078	-0.109923	3.07089	0.0851558	0.770428	0.826696	-0.106719	3.07089	0.0726104	0.787573	0.832083	0.123046	3.07089	0.0925506	0.760959	0.904074
slr0447	-1.57178	11.1967	24.017	9.54901e-07	8.07438e-06	-2.04168	11.1967	39.3239	3.59021e-10	3.93832e-09	-2.45951	11.1967	55.2697	1.05077e-13	1.23618e-12	-0.887737	11.1967	7.87794	0.00500415	0.0385035
slr0448	-1.75467	3.207	18.3047	1.88238e-05	0.000108756	-1.74045	3.207	17.8456	2.39568e-05	0.000101286	-1.94201	3.207	19.4095	1.05484e-05	3.88353e-05	-0.18734	3.207	0.147809	0.700638	0.876
slr0449	-0.505565	2.82152	1.00347	0.316472	0.431577	-0.791577	2.82152	2.35392	0.124968	0.189879	-0.213415	2.82152	0.171633	0.678665	0.737738	0.29215	2.82152	0.303249	0.581853	0.80224
slr0451	1.38755	8.03784	27.6591	1.44691e-07	1.51552e-06	1.51553	8.03784	32.8216	1.01014e-08	8.51925e-08	1.43757	8.03784	29.4556	5.72132e-08	3.11175e-07	0.0500189	8.03784	0.0376281	0.846192	0.946135
slr0452	0.0673188	8.16045	0.0575434	0.810422	0.867317	-0.0186084	8.16045	0.00439211	0.947161	0.961855	-0.0907682	8.16045	0.103844	0.747265	0.797885	-0.158087	8.16045	0.314833	0.57473	0.798556
slr0453	-0.348828	7.676	1.84254	0.174653	0.265994	-0.906545	7.676	12.1797	0.000483127	0.00146199	-1.46457	7.676	30.3412	3.62354e-08	2.03558e-07	-1.11574	7.676	17.7879	2.46948e-05	0.000673815
slr0454	-0.277981	6.236	1.0249	0.31136	0.426037	-0.171094	6.236	0.389603	0.532508	0.627557	-0.0846595	6.236	0.0935932	0.759658	0.806872	0.193322	6.236	0.482577	0.487257	0.73723
slr0455	2.10659	5.09442	43.4099	4.43935e-11	1.04453e-09	2.30082	5.09442	52.0615	5.37892e-13	9.9235e-12	2.32642	5.09442	51.6601	6.59897e-13	6.97944e-12	0.219832	5.09442	0.578604	0.44686	0.71063
slr0456	1.27948	5.55082	16.8846	3.97228e-05	0.000212487	1.58873	5.55082	26.0651	3.30093e-07	2.07716e-06	1.3589	5.55082	18.5742	1.63416e-05	5.77378e-05	0.0794199	5.55082	0.0692549	0.792425	0.924475
slr0457	-1.46301	2.5666	8.69474	0.00319129	0.00967519	-0.911495	2.5666	3.69371	0.0546181	0.093883	-0.971789	2.5666	3.72814	0.0535029	0.0856205	0.491221	2.5666	0.775965	0.378378	0.657353
slr0458	-1.06934	1.84526	3.8213	0.0506051	0.0981309	-0.188976	1.84526	0.147223	0.701203	0.770493	-0.261329	1.84526	0.238919	0.624988	0.690956	0.80801	1.84526	1.78645	0.18136	0.431727
slr0459	-0.452599	4.00258	1.24476	0.264555	0.37577	-0.551047	4.00258	1.82161	0.177122	0.255493	-0.863607	4.00258	4.06812	0.0436999	0.0716273	-0.411008	4.00258	0.898762	0.343114	0.617909
slr0460	2.70405	7.07341	32.151	1.42644e-08	1.87516e-07	2.63567	7.07341	30.6694	3.05955e-08	2.37664e-07	3.14569	7.07341	42.0325	8.97708e-11	7.34221e-10	0.441639	7.07341	0.992411	0.319154	0.593306
slr0462	2.62367	2.2091	15.913	6.63221e-05	0.000336481	2.06566	2.2091	9.24223	0.00236497	0.00605603	2.07412	2.2091	8.623	0.00331944	0.00726786	-0.549553	2.2091	0.904738	0.341514	0.616397
slr0467	-1.75326	2.09827	10.4189	0.0012473	0.00433619	-1.89149	2.09827	11.8299	0.000582881	0.00173485	-1.81564	2.09827	9.83251	0.00171454	0.00399937	-0.0623834	2.09827	0.00848785	0.926595	0.974621
slr0468	-0.154777	6.0944	0.184542	0.667498	0.757799	-0.388605	6.0944	1.15147	0.283243	0.378628	0.0351562	6.0944	0.00941899	0.922686	0.937703	0.189933	6.0944	0.273581	0.60094	0.815608
slr0469	-0.750569	9.37886	9.34107	0.00224075	0.00719654	-1.06789	9.37886	18.6701	1.55401e-05	6.88388e-05	-1.11687	9.37886	20.2964	6.63255e-06	2.51294e-05	-0.366297	9.37886	2.22184	0.136071	0.367572
slr0473	2.02212	10.9493	56.3125	6.18225e-14	2.72104e-12	2.29775	10.9493	71.3283	3.02464e-17	1.22317e-15	2.34887	10.9493	74.2211	6.9841e-18	1.64329e-16	0.326751	10.9493	1.58701	0.207753	0.464904
slr0474	1.65419	7.963	39.827	2.77477e-10	5.26882e-09	1.91652	7.963	52.8021	3.68907e-13	6.9642e-12	1.6706	7.963	40.3224	2.15326e-10	1.70113e-09	0.0164081	7.963	0.00418154	0.948441	0.985335
slr0476	0.0242192	9.58031	0.00452477	0.94637	0.964186	-0.090645	9.58031	0.0633598	0.801262	0.850785	-0.46359	9.58031	1.64684	0.19939	0.266647	-0.487809	9.58031	1.8225	0.177016	0.426388
slr0477	1.05078	5.43128	9.10596	0.00254777	0.0080473	1.28639	5.43128	13.6092	0.000225078	0.000751881	1.75437	5.43128	24.8552	6.18022e-07	2.83435e-06	0.703586	5.43128	4.32678	0.0375171	0.174275
slr0479	-0.624716	2.14661	1.6744	0.19567	0.292784	-0.608995	2.14661	1.5952	0.206585	0.291012	-1.50461	2.14661	6.84013	0.00891322	0.0176471	-0.879895	2.14661	2.08377	0.148872	0.387641
slr0480	-0.959101	3.14906	5.78951	0.0161221	0.0387479	-0.947298	3.14906	5.57671	0.0182009	0.0361458	-1.70485	3.14906	14.366	0.000150496	0.000446675	-0.745747	3.14906	2.45814	0.116917	0.33655
slr0482	-0.440018	2.4758	0.84067	0.359205	0.473737	-0.787496	2.4758	2.54693	0.110509	0.171767	-1.38739	2.4758	6.21141	0.012693	0.0240877	-0.947367	2.4758	2.73298	0.0982959	0.306327
slr0483	-1.39764	9.03936	28.6159	8.82531e-08	9.64841e-07	-2.04338	9.03936	58.6018	1.93036e-14	4.60874e-13	-2.84526	9.03936	105.511	9.43817e-25	5.02389e-23	-1.44762	9.03936	29.7473	4.92185e-08	4.20559e-06
slr0484	-0.244971	6.32561	0.859417	0.353902	0.467875	-0.647968	6.32561	5.8983	0.0151555	0.0308527	-0.90774	6.32561	11.0409	0.000891239	0.00221751	-0.66277	6.32561	5.86774	0.0154208	0.090545
slr0487	0.428107	2.33592	0.753508	0.385368	0.499916	0.629907	2.33592	1.69535	0.192898	0.27471	0.857939	2.33592	2.91355	0.0878381	0.132779	0.429832	2.33592	0.781143	0.376792	0.656002
slr0488	-0.497318	5.38445	2.36544	0.124049	0.202916	-0.529615	5.38445	2.67466	0.101957	0.159841	-0.662011	5.38445	4.02577	0.0448101	0.073262	-0.164693	5.38445	0.24498	0.620632	0.830322
slr0489	0.845863	4.00199	6.65424	0.009892	0.0254713	1.16772	4.00199	13.14	0.000289065	0.000932995	1.47832	4.00199	20.4808	6.02334e-06	2.29821e-05	0.632461	4.00199	4.20897	0.0402108	0.181844
slr0491	0.492332	2.50739	1.06952	0.301054	0.415436	0.865356	2.50739	3.52598	0.0604142	0.102383	0.740149	2.50739	2.25959	0.132789	0.189774	0.247817	2.50739	0.272114	0.601917	0.815608
slr0492	0.0866319	3.28381	0.0551194	0.814383	0.86955	0.266057	3.28381	0.532229	0.465671	0.565669	0.119654	3.28381	0.0951098	0.757779	0.806724	0.0330218	3.28381	0.00725606	0.932116	0.977996
slr0493	-0.559166	3.44855	1.87771	0.170594	0.260914	-0.137742	3.44855	0.120216	0.728801	0.794099	-0.0588096	3.44855	0.0205965	0.885884	0.911427	0.500356	3.44855	1.39433	0.237675	0.503777
slr0498	0.662864	3.87116	3.35545	0.066983	0.123781	0.163196	3.87116	0.193996	0.659612	0.737267	0.531394	3.87116	2.02057	0.155181	0.215884	-0.13147	3.87116	0.130842	0.71756	0.883711
slr0500	1.16272	6.9419	14.9343	0.000111321	0.000529225	1.17972	6.9419	15.3712	8.83224e-05	0.000327004	0.86484	6.9419	8.21394	0.00415698	0.00886841	-0.297878	6.9419	1.00641	0.315764	0.589922
slr0502	-0.557604	3.35581	1.87054	0.171414	0.26192	-0.399913	3.35581	0.979848	0.322236	0.419359	-0.310415	3.35581	0.556438	0.455699	0.531676	0.247189	3.35581	0.330492	0.565369	0.792452
slr0503	0.623142	7.6096	5.27872	0.0215876	0.0492932	0.946172	7.6096	12.1149	0.000500194	0.00151223	1.37246	7.6096	25.0371	5.62365e-07	2.59744e-06	0.74932	7.6096	7.69894	0.00552531	0.041338
slr0505	0.382285	3.02451	1.11602	0.290778	0.404004	0.0809032	3.02451	0.0474954	0.82748	0.873481	-0.0810442	3.02451	0.0407002	0.840118	0.873475	-0.463329	3.02451	1.40722	0.235519	0.502121
slr0506	-2.2474	5.18234	33.6221	6.69295e-09	9.48996e-08	-2.71819	5.18234	46.5802	8.79465e-12	1.29214e-10	-3.11355	5.18234	55.9448	7.45337e-14	8.89746e-13	-0.866143	5.18234	4.36716	0.0366379	0.17117
slr0509	-0.836083	3.70408	5.25425	0.0218932	0.049781	-0.856592	3.70408	5.48447	0.0191861	0.0378018	-1.43964	3.70408	12.9842	0.000314134	0.000862938	-0.603557	3.70408	2.12041	0.145347	0.382372
slr0510	-1.03087	2.57627	4.66265	0.0308255	0.0655042	-0.946592	2.57627	3.98989	0.0457739	0.0802094	-0.712943	2.57627	2.09217	0.148056	0.208218	0.317928	2.57627	0.357643	0.549818	0.780953
slr0513	-0.204458	7.59936	0.323516	0.569502	0.671694	0.795855	7.59936	4.8917	0.026986	0.0509144	1.49079	7.59936	16.707	4.36198e-05	0.000144377	1.69525	7.59936	21.3059	3.91519e-06	0.000155032
slr0517	0.733695	4.95326	3.65978	0.0557411	0.106153	1.25738	4.95326	10.8442	0.000991048	0.0027598	1.48803	4.95326	14.8943	0.000113703	0.000344397	0.75434	4.95326	4.06549	0.043768	0.191785
slr0518	2.404	8.79457	55.6343	8.72887e-14	3.63367e-12	2.56361	8.79457	62.566	2.57663e-15	6.9143e-14	3.36592	8.79457	101.255	8.08685e-24	3.86173e-22	0.961924	8.79457	9.88179	0.00166923	0.0167869
slr0519	2.06763	6.17369	48.9521	2.62289e-12	8.07964e-11	2.46932	6.17369	69.4423	7.86833e-17	2.87061e-15	2.92197	6.17369	95.006	1.89808e-22	7.51593e-21	0.854341	6.17369	9.96675	0.00159392	0.0163264
slr0520	1.12757	5.98873	15.1107	0.000101386	0.000489155	1.77886	5.98873	37.5862	8.74621e-10	8.86623e-09	1.96601	5.98873	45.0675	1.90362e-11	1.69344e-10	0.838432	5.98873	9.01453	0.00267842	0.0237619
slr0521	0.0886124	3.72981	0.0629381	0.801911	0.860477	0.760817	3.72981	5.01102	0.0251864	0.0480495	0.452998	3.72981	1.57373	0.209666	0.277985	0.364385	3.72981	1.02156	0.312149	0.585527
slr0522	-0.0789892	3.62946	0.0457261	0.830674	0.880287	0.229709	3.62946	0.396698	0.528799	0.624595	-0.0650637	3.62946	0.028583	0.865746	0.892805	0.0139255	3.62946	0.00128968	0.971352	0.990044
slr0523	-0.524961	4.52936	2.81643	0.0933038	0.160635	-0.352706	4.52936	1.29161	0.255751	0.348478	-0.396589	4.52936	1.52939	0.216204	0.285603	0.128372	4.52936	0.153056	0.695632	0.874794
slr0525	-1.23084	3.51523	9.97345	0.00158814	0.00535481	-0.78616	3.51523	4.35322	0.0369391	0.0668568	-0.721637	3.51523	3.39896	0.0652377	0.101938	0.509202	3.51523	1.4705	0.225266	0.488909
slr0526	-0.601288	2.83	2.17348	0.140409	0.223265	-0.951495	2.83	5.17747	0.0228817	0.0442242	-1.7555	2.83	13.0311	0.000306361	0.000843727	-1.15421	2.83	5.17939	0.0228564	0.120414
slr0527	0.682509	5.033	5.17617	0.0228988	0.0517054	0.692231	5.033	5.31638	0.0211258	0.0412729	1.1438	5.033	14.2961	0.000156185	0.000461869	0.461288	5.033	2.45512	0.117142	0.336788
slr0528	-0.451603	7.0302	2.74465	0.0975804	0.167024	-0.617818	7.0302	5.09686	0.0239693	0.0460522	-0.681679	7.0302	6.10233	0.0135004	0.025471	-0.230076	7.0302	0.693757	0.40489	0.679068
slr0530	-1.19341	2.79785	6.5023	0.0107735	0.0274796	-1.19856	2.79785	6.50552	0.010754	0.0227529	-0.75537	2.79785	2.51951	0.112445	0.165085	0.438041	2.79785	0.729068	0.393185	0.669324
slr0531	-0.712982	2.89365	3.32595	0.0681946	0.125313	-0.424195	2.89365	1.23815	0.265827	0.360092	-0.806505	2.89365	3.63518	0.0565706	0.0899974	-0.0935235	2.89365	0.0433892	0.834994	0.943851
slr0533	1.17512	5.53007	12.1336	0.000495224	0.00191884	1.47551	5.53007	19.1635	1.19985e-05	5.4412e-05	2.13398	5.53007	39.1224	3.98052e-10	3.01276e-09	0.958861	5.53007	8.75161	0.00309329	0.0266929
slr0534	-0.555111	5.50413	3.07738	0.0793881	0.141712	-0.336465	5.50413	1.14718	0.28414	0.379204	-0.177503	5.50413	0.311782	0.576588	0.648103	0.377608	5.50413	1.37537	0.240891	0.505986
slr0535	0.439001	7.44495	3.1993	0.0736696	0.133114	0.520501	7.44495	4.49292	0.0340355	0.062191	0.855906	7.44495	12.0068	0.00053008	0.00139479	0.416904	7.44495	2.89669	0.0887618	0.286776
slr0536	-0.425221	5.81159	2.52809	0.111835	0.187373	-0.535899	5.81159	3.98387	0.045938	0.08041	-0.39474	5.81159	2.10713	0.146614	0.206658	0.0304805	5.81159	0.0123318	0.911578	0.967918
slr0537	-0.453845	5.52669	2.98164	0.0842138	0.148853	-0.504269	5.52669	3.65819	0.0557942	0.0955504	-1.10312	5.52669	15.7727	7.14275e-05	0.000224951	-0.649275	5.52669	5.36631	0.0205293	0.111283
slr0541	0.144008	3.60495	0.187707	0.664832	0.755322	0.488874	3.60495	2.26583	0.132256	0.199273	0.270764	3.60495	0.609103	0.435126	0.512607	0.126756	3.60495	0.135	0.713303	0.882964
slr0542	-0.101327	6.1828	0.151234	0.697359	0.780939	0.253023	6.1828	0.953528	0.328823	0.425806	0.370446	6.1828	2.00604	0.156674	0.217495	0.471773	6.1828	3.23069	0.0722702	0.255901
slr0543	0.631698	7.23967	5.40963	0.0200259	0.0461492	0.645227	7.23967	5.63548	0.0176005	0.0351902	1.00293	7.23967	13.4365	0.000246773	0.000694946	0.371234	7.23967	1.88741	0.169495	0.415672
slr0544	0.554602	4.08697	2.50188	0.113711	0.189149	0.378654	4.08697	1.14904	0.28375	0.378995	0.740084	4.08697	4.28571	0.038434	0.0643606	0.185482	4.08697	0.283287	0.594555	0.811703
slr0545	0.614985	4.10435	3.86618	0.0492687	0.0962181	0.685796	4.10435	4.82061	0.0281213	0.052689	0.374301	4.10435	1.29024	0.256004	0.327778	-0.240684	4.10435	0.568975	0.450666	0.713336
slr0546	-0.0993664	2.52406	0.0440696	0.833724	0.882655	-0.364532	2.52406	0.573458	0.448888	0.5496	-0.472937	2.52406	0.838294	0.359885	0.439138	-0.37357	2.52406	0.512697	0.473974	0.728785
slr0549	1.36577	7.52863	24.5794	7.13113e-07	6.3612e-06	1.48066	7.52863	28.7643	8.17425e-08	5.89818e-07	1.41353	7.52863	26.0664	3.29883e-07	1.6083e-06	0.0477578	7.52863	0.0314588	0.859221	0.949774
slr0550	0.836545	7.16685	8.84413	0.00294032	0.0090926	0.837159	7.16685	8.84988	0.00293108	0.00730969	0.423174	7.16685	2.2373	0.134716	0.192274	-0.413371	7.16685	2.16362	0.141312	0.37579
slr0551	3.47831	11.8489	119.364	8.71797e-28	4.71787e-25	3.80607	11.8489	138.723	5.06275e-32	1.36989e-29	3.86912	11.8489	142.504	7.54448e-33	1.28931e-30	0.390813	11.8489	1.83111	0.175997	0.424749
slr0552	2.22935	8.3678	44.7136	2.2807e-11	5.62706e-10	2.12684	8.3678	40.9472	1.564e-10	1.79445e-09	1.94136	8.3678	34.3913	4.50741e-09	2.84304e-08	-0.287993	8.3678	0.820912	0.364914	0.642906
slr0553	0.343433	3.71846	0.752117	0.385807	0.500285	0.00295918	3.71846	5.59663e-05	0.994031	0.995564	-0.285842	3.71846	0.454191	0.500351	0.575298	-0.629276	3.71846	2.25357	0.133306	0.364042
slr0554	-0.691611	5.51878	4.85378	0.0275856	0.0598334	-0.831696	5.51878	6.95408	0.00836285	0.0182168	-0.873908	5.51878	7.42339	0.00643813	0.013131	-0.182297	5.51878	0.317639	0.57303	0.797526
slr0556	1.35997	5.38771	22.7396	1.85507e-06	1.45845e-05	1.53602	5.38771	29.1701	6.62927e-08	4.82629e-07	1.69974	5.38771	34.8074	3.63982e-09	2.33567e-08	0.339765	5.38771	1.57652	0.209263	0.467316
slr0557	-1.9398	5.91941	50.6448	1.10692e-12	3.65999e-11	-1.95555	5.91941	51.3385	7.7737e-13	1.3793e-11	-2.35519	5.91941	68.0401	1.60205e-16	2.88991e-15	-0.415396	5.91941	2.06637	0.15058	0.389711
slr0559	-0.0658449	7.99946	0.0578299	0.809959	0.867108	-0.39376	7.99946	2.0548	0.151727	0.223834	-0.520423	7.99946	3.54678	0.0596613	0.0943136	-0.454578	7.99946	2.70572	0.0999892	0.309795
slr0565	0.234389	9.44265	0.68661	0.40732	0.521312	0.0465654	9.44265	0.0271024	0.869237	0.906404	0.0647942	9.44265	0.0523497	0.819024	0.856342	-0.169594	9.44265	0.358659	0.549252	0.780953
slr0569	0.259275	5.37208	0.793082	0.37317	0.488582	0.28928	5.37208	0.98332	0.321381	0.418917	0.306766	5.37208	1.07408	0.300025	0.376859	0.0474909	5.37208	0.0260612	0.871751	0.952414
slr0572	-0.08854	2.31706	0.0248728	0.874684	0.914981	-0.141337	2.31706	0.0626052	0.802425	0.851462	-0.437386	2.31706	0.526383	0.468131	0.542865	-0.348846	2.31706	0.327441	0.56717	0.794203
slr0573	-0.118005	5.07256	0.0837769	0.772243	0.839743	-0.530418	5.07256	1.65373	0.198453	0.281387	-0.803079	5.07256	3.63204	0.0566772	0.0901228	-0.685074	5.07256	2.63897	0.104271	0.315657
slr0574	0.826047	4.52723	5.75014	0.0164873	0.0394797	0.455353	4.52723	1.70377	0.191795	0.273463	0.729379	4.52723	4.25014	0.0392471	0.0654858	-0.0966682	4.52723	0.0790912	0.778533	0.915573
slr0575	-0.530688	4.71274	2.90382	0.0883698	0.154019	-0.675277	4.71274	4.63555	0.0313161	0.0577419	-1.16509	4.71274	12.2583	0.000463201	0.00123381	-0.634407	4.71274	3.53261	0.060173	0.229705
slr0579	2.11949	6.99053	48.159	3.93018e-12	1.16012e-10	2.57246	6.99053	69.6885	6.94486e-17	2.65294e-15	3.20646	6.99053	104.033	1.99021e-24	1.02575e-22	1.08697	6.99053	14.4237	0.000145953	0.00261829
slr0580	0.729161	5.52417	3.9304	0.0474208	0.093149	0.754199	5.52417	4.2104	0.0401768	0.0719945	0.677077	5.52417	3.33401	0.0678614	0.105481	-0.052084	5.52417	0.0202727	0.886778	0.958661
slr0581	0.114193	7.08336	0.0855653	0.769893	0.83932	0.221395	7.08336	0.32181	0.570522	0.659247	0.337582	7.08336	0.743698	0.388479	0.468222	0.223389	7.08336	0.326259	0.56787	0.794203
slr0582	1.05461	6.11665	10.3648	0.00128442	0.00445093	0.921372	6.11665	7.91289	0.00490837	0.0114002	1.36064	6.11665	16.9589	3.81969e-05	0.000127598	0.306025	6.11665	0.907169	0.340867	0.615777
slr0583	0.451832	5.94719	2.69692	0.100542	0.17146	0.475499	5.94719	2.9856	0.0840083	0.135844	0.671122	5.94719	5.83146	0.0157421	0.0291583	0.219289	5.94719	0.635966	0.425175	0.697272
slr0585	-0.531167	7.3652	4.45571	0.0347847	0.0723818	-0.616988	7.3652	5.98201	0.0144525	0.0295885	-0.479674	7.3652	3.59365	0.0580006	0.0919121	0.0514926	7.3652	0.0411728	0.839205	0.943851
slr0586	-1.70764	3.03684	22.2655	2.37431e-06	1.80126e-05	-2.40307	3.03684	38.1383	6.59052e-10	6.83968e-09	-3.24914	3.03684	48.4533	3.38248e-12	3.28829e-11	-1.5415	3.03684	8.30435	0.00395503	0.0322663
slr0587	2.68566	6.89057	56.1972	6.55545e-14	2.83807e-12	3.63292	6.89057	98.2737	3.64365e-23	3.28637e-21	4.23488	6.89057	128.145	1.04324e-29	1.06547e-27	1.54921	6.89057	22.6497	1.94388e-06	9.1475e-05
slr0588	-0.956559	4.85927	13.3339	0.000260657	0.00109348	-1.20134	4.85927	20.395	6.29946e-06	3.03928e-05	-1.31345	4.85927	22.1213	2.55956e-06	1.0454e-05	-0.356896	4.85927	1.52372	0.217057	0.477496
slr0589	-0.791025	4.2928	5.59216	0.0180411	0.0423567	-0.531741	4.2928	2.57954	0.108253	0.168665	-0.517443	4.2928	2.32002	0.127719	0.183415	0.273582	4.2928	0.605696	0.436413	0.703397
slr0590	-0.909801	2.34827	2.76095	0.0965906	0.165591	-0.455618	2.34827	0.738463	0.390154	0.489501	-1.15834	2.34827	3.89474	0.0484376	0.0783252	-0.248536	2.34827	0.158938	0.690136	0.870241
slr0591	-0.97804	6.09818	9.77622	0.00176783	0.00583942	-0.830269	6.09818	7.10999	0.00766557	0.0168518	-1.00443	6.09818	10.0528	0.00152117	0.00358957	-0.0263871	6.09818	0.00685937	0.933994	0.978076
slr0592	-1.72191	4.9946	26.466	2.68212e-07	2.59965e-06	-1.74242	4.9946	26.9504	2.0874e-07	1.39408e-06	-1.90308	4.9946	29.9188	4.50512e-08	2.47515e-07	-0.181165	4.9946	0.257639	0.611747	0.824208
slr0593	0.441669	5.08537	2.54205	0.110851	0.186108	0.701906	5.08537	6.49699	0.0108057	0.0228277	0.701686	5.08537	6.21426	0.0126726	0.024063	0.260017	5.08537	0.88289	0.347411	0.62117
slr0594	0.56171	6.40428	4.44641	0.0349746	0.0726378	0.989914	6.40428	13.8809	0.000194766	0.00065807	1.5495	6.40428	33.3865	7.55475e-09	4.62835e-08	0.987788	6.40428	14.127	0.000170877	0.0029202
slr0596	0.532225	3.59763	1.92325	0.165499	0.254801	0.94005	3.59763	6.27696	0.0122317	0.0254267	0.707782	3.59763	3.23154	0.0722329	0.111633	0.175557	3.59763	0.210769	0.646165	0.846349
slr0597	0.783236	6.35982	7.94091	0.00483294	0.0138017	1.01475	6.35982	13.3207	0.000262489	0.000857448	0.982697	6.35982	12.296	0.000453928	0.00121022	0.199461	6.35982	0.525806	0.468375	0.725926
slr0598	0.682333	6.43028	6.46218	0.0110194	0.0279532	0.794075	6.43028	8.74571	0.00310331	0.00768607	1.06749	6.43028	15.5668	7.964e-05	0.000248885	0.385157	6.43028	2.10004	0.147296	0.38508
slr0599	1.2959	7.08327	13.982	0.000184571	0.000818719	1.67604	7.08327	23.0719	1.56054e-06	8.67649e-06	1.98475	7.08327	31.7311	1.77063e-08	1.04722e-07	0.688853	7.08327	4.12852	0.0421663	0.18781
slr0600	2.12908	6.74307	50.426	1.23744e-12	4.01797e-11	2.71406	6.74307	80.205	3.37506e-19	1.76755e-17	3.03291	6.74307	98.0229	4.13564e-23	1.86506e-21	0.903835	6.74307	10.5283	0.0011756	0.0129395
slr0601	0.317575	6.27788	0.559342	0.454525	0.568945	0.292335	6.27788	0.473671	0.491303	0.588543	0.663681	6.27788	2.41943	0.119839	0.174179	0.346106	6.27788	0.663245	0.415417	0.689953
slr0602	0.561126	6.02225	2.03248	0.153969	0.239319	0.927324	6.02225	5.53977	0.018589	0.0367815	0.8457	6.02225	4.56657	0.0326017	0.055656	0.284574	6.02225	0.527802	0.467532	0.725926
slr0603	-0.747358	5.48743	5.71383	0.0168318	0.0401269	-0.868084	5.48743	7.61167	0.00579919	0.0131862	-0.825551	5.48743	6.67283	0.00978936	0.0191454	-0.0781927	5.48743	0.0586218	0.808688	0.929765
slr0604	0.573296	9.50036	1.41038	0.234994	0.341398	0.625584	9.50036	1.67758	0.195246	0.277689	0.578825	9.50036	1.43667	0.230679	0.301535	0.00552882	9.50036	0.000132018	0.990833	0.996716
slr0605	0.433933	4.47619	2.35656	0.124757	0.203458	0.358579	4.47619	1.59191	0.207053	0.291545	0.132981	4.47619	0.197883	0.656435	0.719354	-0.300952	4.47619	1.05374	0.304648	0.577461
slr0606	-0.170084	7.17169	0.434339	0.509868	0.620517	0.00335459	7.17169	0.000169344	0.989617	0.993778	0.521375	7.17169	4.07168	0.0436078	0.0715124	0.691459	7.17169	7.10121	0.0077032	0.0543746
slr0607	-2.32695	2.17366	18.3893	1.80067e-05	0.000104791	-2.58446	2.17366	21.5962	3.36511e-06	1.70727e-05	-3.62979	2.17366	28.1252	1.13713e-07	5.91711e-07	-1.30284	2.17366	2.50019	0.113832	0.331195
slr0608	0.612554	4.84972	3.85578	0.0495749	0.0966206	0.515872	4.84972	2.72284	0.0989218	0.155771	0.338867	4.84972	1.10551	0.293061	0.369685	-0.273687	4.84972	0.747813	0.38717	0.664099
slr0609	0.589824	7.23329	5.39338	0.0202133	0.0465479	0.696437	7.23329	7.51106	0.00613211	0.0139043	1.07301	7.23329	17.5746	2.76259e-05	9.42242e-05	0.483183	7.23329	3.65813	0.0557961	0.222851
slr0610	0.568679	3.95077	2.82416	0.0928556	0.160033	0.277455	3.95077	0.648217	0.420751	0.521243	0.753324	3.95077	4.69565	0.030239	0.0520882	0.184644	3.95077	0.298314	0.584941	0.803428
slr0611	0.0663196	2.31785	0.0143128	0.904772	0.936796	0.574427	2.31785	1.15555	0.28239	0.377644	0.726411	2.31785	1.70556	0.191563	0.257424	0.660092	2.31785	1.40893	0.235234	0.50188
slr0612	0.545524	2.9797	1.23512	0.266413	0.377583	0.449432	2.9797	0.829062	0.362544	0.460736	0.162443	2.9797	0.095383	0.757442	0.80663	-0.383081	2.9797	0.559138	0.454608	0.716907
slr0613	0.813333	5.2142	8.83624	0.00295308	0.00912335	1.03243	5.2142	14.3546	0.00015141	0.00053024	0.942919	5.2142	11.4052	0.000732377	0.00186074	0.129586	5.2142	0.230411	0.631219	0.836217
slr0615	0.534968	7.18472	4.31757	0.0377207	0.0767244	0.588997	7.18472	5.22594	0.0222524	0.0431107	0.430053	7.18472	2.74829	0.0973585	0.145344	-0.104915	7.18472	0.165583	0.684067	0.867029
slr0616	0.0269048	5.04757	0.00815658	0.928038	0.952082	-0.225511	5.04757	0.561761	0.453552	0.554057	-0.491427	5.04757	2.47363	0.115771	0.168765	-0.518332	5.04757	2.74636	0.097476	0.304348
slr0617	0.511153	7.55079	2.95463	0.0856318	0.150133	1.04369	7.55079	12.2275	0.000470912	0.0014317	1.85115	7.55079	37.1292	1.10555e-09	7.71984e-09	1.33999	7.55079	20.1038	7.33499e-06	0.000248091
slr0618	1.06492	5.75985	8.17363	0.00425038	0.0123113	1.41514	5.75985	14.3794	0.000149425	0.000523957	1.4683	5.75985	15.2355	9.49043e-05	0.000292644	0.403381	5.75985	1.22601	0.268184	0.540646
slr0619	0.315463	5.46369	1.20989	0.271354	0.382581	0.474767	5.46369	2.74496	0.0975616	0.154077	0.47395	5.46369	2.65631	0.10314	0.152781	0.158487	5.46369	0.301651	0.582849	0.802251
slr0623	-1.08346	9.46465	18.0037	2.20472e-05	0.000124557	-1.3194	9.46465	26.38	2.80429e-07	1.79951e-06	-1.41863	9.46465	30.2243	3.84854e-08	2.15081e-07	-0.335176	9.46465	1.7402	0.187114	0.438353
slr0624	-0.0955071	5.36946	0.150051	0.698486	0.781525	-0.196413	5.36946	0.627655	0.428217	0.528878	-0.610452	5.36946	5.51229	0.0188833	0.0342537	-0.514945	5.36946	3.88552	0.0487042	0.202961
slr0625	-1.71148	4.29319	22.8158	1.78292e-06	1.42178e-05	-2.37576	4.29319	39.9888	2.55419e-10	2.85981e-09	-2.54779	4.29319	41.5309	1.16021e-10	9.44161e-10	-0.836304	4.29319	4.14009	0.0418789	0.187044
slr0626	-0.57473	3.43953	2.69012	0.100972	0.171833	-0.680512	3.43953	3.70771	0.0541616	0.0931969	-0.465242	3.43953	1.62923	0.201809	0.269439	0.109487	3.43953	0.0834188	0.772717	0.911705
slr0628	-0.263531	10.0383	1.0035	0.316465	0.431577	-0.260133	10.0383	0.977594	0.322794	0.419916	0.0474878	10.0383	0.0325943	0.856729	0.886208	0.311019	10.0383	1.39443	0.237658	0.503777
slr0630	1.51547	5.48126	23.7432	1.10081e-06	9.16499e-06	2.0813	5.48126	45.1616	1.81429e-11	2.56131e-10	2.3701	5.48126	57.3751	3.60137e-14	4.6038e-13	0.854626	5.48126	8.72148	0.00314483	0.0270139
slr0633	1.84369	9.00809	43.4729	4.29865e-11	1.01881e-09	2.41652	9.00809	72.0358	2.11327e-17	8.91139e-16	2.4084	9.00809	71.4478	2.84685e-17	6.00241e-16	0.564704	9.00809	4.37065	0.0365631	0.171067
slr0634	0.927161	4.91907	8.64435	0.00328077	0.00989104	1.0503	4.91907	11.1072	0.000859942	0.00244504	1.23671	4.91907	14.9859	0.000108316	0.000329617	0.309546	4.91907	1.01842	0.312894	0.586585
slr0635	-0.0922156	3.84873	0.0783458	0.779552	0.844579	0.15615	3.84873	0.231102	0.630708	0.71034	0.0173654	3.84873	0.00257944	0.959494	0.965816	0.109581	3.84873	0.100884	0.750772	0.900205
slr0637	-0.448833	5.19306	3.05793	0.0803441	0.143261	-0.512025	5.19306	3.94649	0.0469692	0.0820382	-0.996959	5.19306	13.3104	0.000263941	0.000739445	-0.548126	5.19306	3.91258	0.0479258	0.202361
slr0638	-0.571967	4.59243	3.54571	0.0596995	0.112243	-1.13287	4.59243	13.066	0.000300697	0.000961933	-1.17762	4.59243	13.1739	0.000283868	0.000788468	-0.605656	4.59243	3.36469	0.0666083	0.241921
slr0639	-1.1848	2.32107	5.76323	0.016365	0.0392445	-1.64829	2.32107	10.2254	0.00138517	0.00376373	-1.5137	2.32107	7.80673	0.0052052	0.010897	-0.328899	2.32107	0.311565	0.576721	0.798556
slr0640	-0.0230508	3.71928	0.00576354	0.939484	0.960731	-0.247042	3.71928	0.637919	0.424465	0.524844	-0.031992	3.71928	0.00999853	0.92035	0.935915	-0.00894119	3.71928	0.000769442	0.97787	0.992227
slr0642	1.18543	5.36555	15.1022	0.000101845	0.000490265	1.16882	5.36555	14.6322	0.000130661	0.000463161	1.55392	5.36555	25.4291	4.58938e-07	2.15654e-06	0.368493	5.36555	1.56978	0.210239	0.469015
slr0643	0.599498	6.30576	3.9575	0.0466631	0.0919946	0.974283	6.30576	10.4553	0.00122298	0.00336241	1.17799	6.30576	15.0629	0.000103985	0.000317926	0.578489	6.30576	3.75525	0.0526418	0.214196
slr0644	-0.0053451	2.93145	0.000178969	0.989326	0.99296	0.0641851	2.93145	0.0262324	0.871334	0.907966	0.220178	2.93145	0.282318	0.595186	0.664113	0.225523	2.93145	0.292683	0.588506	0.807642
slr0645	-1.24625	4.53469	14.765	0.000121776	0.000572225	-0.923872	4.53469	8.35849	0.00383889	0.00927446	-1.08299	4.53469	10.6402	0.00110657	0.00269544	0.163263	4.53469	0.222107	0.637439	0.841759
slr0646	-0.817905	3.89065	4.49138	0.0340661	0.0712384	-0.724745	3.89065	3.55063	0.0595228	0.101083	-0.927728	3.89065	5.28034	0.0215675	0.0385414	-0.109823	3.89065	0.0698602	0.79154	0.924375
slr0649	-0.2583	5.75359	0.947238	0.330423	0.444813	-0.522292	5.75359	3.79786	0.051318	0.088964	-0.414517	5.75359	2.32108	0.127631	0.183415	-0.156217	5.75359	0.325709	0.568197	0.794203
slr0650	-0.540139	4.91342	3.02305	0.0820888	0.145572	-0.461488	4.91342	2.21719	0.136481	0.204596	-0.0651584	4.91342	0.0436504	0.834505	0.86916	0.474981	4.91342	2.22667	0.135646	0.36673
slr0651	-0.730985	2.914	2.48238	0.115128	0.190627	0.0116026	2.914	0.000698931	0.978909	0.985586	0.232487	2.914	0.265631	0.606277	0.674667	0.963472	2.914	4.07434	0.0435392	0.191499
slr0652	0.504198	6.14817	2.49942	0.113888	0.189251	0.611125	6.14817	3.67138	0.0553544	0.0948975	1.05774	6.14817	10.8382	0.000994257	0.00245129	0.553542	6.14817	3.04025	0.0812233	0.270495
slr0653	-0.873248	7.91844	9.20936	0.00240781	0.00766486	-1.14222	7.91844	15.5428	8.06571e-05	0.000301134	-0.874599	7.91844	9.16112	0.00247212	0.00559341	-0.00135139	7.91844	2.20278e-05	0.996255	0.997976
slr0654	1.28786	7.52038	20.0474	7.55468e-06	5.08922e-05	1.29316	7.52038	20.1993	6.97791e-06	3.31779e-05	1.39328	7.52038	23.226	1.44035e-06	6.13754e-06	0.105422	7.52038	0.139959	0.708321	0.880571
slr0655	0.185978	4.18257	0.30319	0.58189	0.681845	0.334053	4.18257	0.989482	0.319869	0.417282	0.0596335	4.18257	0.0289751	0.864837	0.892318	-0.126344	4.18257	0.131141	0.717251	0.883711
slr0656	-0.011486	5.05702	0.00128672	0.971385	0.979835	0.142958	5.05702	0.199921	0.654784	0.733133	-0.37443	5.05702	1.273	0.259205	0.331224	-0.362944	5.05702	1.19286	0.274754	0.547493
slr0657	-1.69183	5.01244	28.4696	9.51828e-08	1.03364e-06	-1.9718	5.01244	37.4437	9.40879e-10	9.42912e-09	-2.19009	5.01244	42.2774	7.92045e-11	6.56064e-10	-0.498262	5.01244	2.08107	0.149136	0.387706
slr0658	0.260273	5.73765	0.626108	0.428786	0.543219	0.233308	5.73765	0.502402	0.478446	0.576658	0.0372251	5.73765	0.0124003	0.911334	0.929366	-0.223048	5.73765	0.448265	0.50316	0.750778
slr0659	0.362318	5.95636	1.69069	0.19351	0.290354	0.424525	5.95636	2.321	0.127638	0.193483	0.418773	5.95636	2.2011	0.137913	0.196405	0.056455	5.95636	0.0405329	0.840442	0.944067
slr0661	0.00363619	4.67583	0.00017002	0.989597	0.99296	0.200728	4.67583	0.52408	0.469106	0.56793	0.127244	4.67583	0.196048	0.65793	0.720325	0.123608	4.67583	0.184182	0.667804	0.858022
slr0662	0.251149	5.64443	0.935795	0.333362	0.447838	-0.0184685	5.64443	0.00498946	0.943687	0.959556	-0.435775	5.64443	2.57885	0.1083	0.159623	-0.686924	5.64443	6.4431	0.0111384	0.0711936
slr0664	1.06652	2.8716	4.40974	0.0357343	0.0734504	0.339601	2.8716	0.418708	0.517582	0.614026	0.87144	2.8716	2.72777	0.0986169	0.146952	-0.195081	2.8716	0.152191	0.69645	0.875454
slr0665	0.937559	8.39653	13.6786	0.000216917	0.000930422	0.940736	8.39653	13.7628	0.000207405	0.00069787	1.0147	8.39653	15.9006	6.67578e-05	0.000211476	0.0771422	8.39653	0.0944285	0.758621	0.902948
slr0666	0.5764	7.51561	4.13965	0.0418898	0.0839089	0.492759	7.51561	3.02343	0.0820695	0.133173	0.739661	7.51561	6.7518	0.00936532	0.0184298	0.163261	7.51561	0.334181	0.563207	0.792003
slr0667	1.14821	7.67037	8.31218	0.003938	0.0115665	0.801349	7.67037	4.08933	0.0431547	0.0761539	0.807676	7.67037	4.13904	0.0419048	0.0691387	-0.340533	7.67037	0.747854	0.387157	0.664099
slr0668	1.37535	4.316	15.7181	7.3519e-05	0.000368389	0.212846	4.316	0.352868	0.552494	0.644749	-0.358517	4.316	0.869465	0.351104	0.42975	-1.73386	4.316	21.904	2.86631e-06	0.000127492
slr0670	0.949164	7.10398	12.4608	0.000415589	0.00164363	1.12313	7.10398	17.3756	3.06736e-05	0.000126392	1.15603	7.10398	18.2135	1.9747e-05	6.89446e-05	0.206869	7.10398	0.607385	0.435774	0.703397
slr0676	-0.837166	3.4809	5.57846	0.0181827	0.0426584	-1.07263	3.4809	8.72967	0.00313073	0.0077363	-0.762384	3.4809	4.21809	0.0399951	0.0665628	0.0747815	3.4809	0.0364567	0.848575	0.946135
slr0677	0.52742	7.33088	4.34641	0.0370871	0.0757369	0.729928	7.33088	8.30695	0.00394936	0.00949191	1.02487	7.33088	16.1688	5.79394e-05	0.000186822	0.497448	7.33088	3.89741	0.0483605	0.202961
slr0678	0.367383	6.1456	1.22445	0.26849	0.379793	0.700747	6.1456	4.46351	0.0346264	0.0631995	0.942671	6.1456	7.96614	0.00476605	0.010062	0.575288	6.1456	3.01575	0.0824595	0.272654
slr0679	0.202747	6.80946	0.55704	0.455455	0.569485	0.640895	6.80946	5.58104	0.0181559	0.0361006	0.850873	6.80946	9.71394	0.00182876	0.00424748	0.648126	6.80946	5.68724	0.0170887	0.0976886
slr0680	1.18885	5.05792	12.7878	0.000348894	0.00140903	0.97328	5.05792	8.52781	0.00349759	0.00851965	1.00347	5.05792	8.79556	0.00301965	0.00667902	-0.185388	5.05792	0.323208	0.569686	0.794639
slr0681	0.693403	6.15599	4.24694	0.0393211	0.0794991	0.640386	6.15599	3.61854	0.057139	0.0977469	0.368074	6.15599	1.17412	0.278557	0.353172	-0.325329	6.15599	0.930705	0.33468	0.610379
slr0682	1.25968	5.8201	18.9443	1.34589e-05	8.15316e-05	1.37308	5.8201	22.4974	2.10432e-06	1.14069e-05	1.74327	5.8201	35.594	2.43041e-09	1.61751e-08	0.483592	5.8201	3.02246	0.0821186	0.272637
slr0686	-1.07324	6.9532	14.7936	0.000119944	0.000564431	-1.17424	6.9532	17.5556	2.79034e-05	0.000116364	-1.27562	6.9532	20.2503	6.79432e-06	2.57123e-05	-0.202374	6.9532	0.512758	0.473947	0.728785
slr0687	1.53156	6.19511	30.8131	2.84118e-08	3.52112e-07	1.80798	6.19511	42.8177	6.00871e-11	7.56212e-10	2.00006	6.19511	51.3839	7.59576e-13	7.9817e-12	0.468501	6.19511	3.17971	0.0745582	0.259754
slr0688	0.77472	5.3977	4.34902	0.0370301	0.0756683	0.905826	5.3977	5.9448	0.0147608	0.0301455	1.20775	5.3977	10.4075	0.00125506	0.00302762	0.433033	5.3977	1.397	0.237227	0.503777
slr0689	-0.454312	7.16373	2.02757	0.154467	0.239749	-0.341317	7.16373	1.14801	0.283966	0.379127	-0.761018	7.16373	5.56857	0.0182857	0.0333186	-0.306706	7.16373	0.906738	0.340981	0.615777
slr0692	0.795497	6.38843	8.44946	0.00365152	0.0108675	0.823769	6.38843	9.05573	0.00261873	0.00661713	0.814686	6.38843	8.68499	0.00320841	0.00702948	0.0191891	6.38843	0.00498633	0.943705	0.983064
slr0695	0.923229	6.15858	8.77407	0.00305543	0.00936825	1.02351	6.15858	10.7846	0.00102349	0.00284653	0.76458	6.15858	5.90745	0.015077	0.0280705	-0.158649	6.15858	0.263198	0.607932	0.82096
slr0697	-0.130914	4.20286	0.184289	0.667713	0.757799	0.029955	4.20286	0.00979901	0.921146	0.943224	0.410892	4.20286	1.81103	0.178385	0.241743	0.541806	4.20286	3.08078	0.0792223	0.267396
slr0698	0.315743	4.25307	0.980609	0.322049	0.437711	0.569545	4.25307	3.25409	0.0712457	0.11833	0.740274	4.25307	5.28479	0.0215124	0.0384655	0.424531	4.25307	1.78433	0.181619	0.432027
slr0699	0.424429	3.80019	1.35038	0.245211	0.352925	-0.125987	3.80019	0.111958	0.737925	0.799214	0.308878	3.80019	0.660076	0.416533	0.496871	-0.115551	3.80019	0.095543	0.757245	0.902948
slr0700	-0.470562	3.22299	1.40105	0.236548	0.343042	-0.841902	3.22299	4.24562	0.0393518	0.0706331	-0.963097	3.22299	4.95431	0.0260257	0.0454331	-0.492535	3.22299	1.2258	0.268225	0.540646
slr0701	1.7237	3.89762	8.03809	0.00458037	0.0131965	1.58114	3.89762	6.79912	0.00912028	0.0196246	0.607032	3.89762	0.95852	0.32756	0.405022	-1.11667	3.89762	3.42332	0.0642816	0.237454
slr0702	1.42423	6.48057	24.0506	9.38364e-07	7.9761e-06	1.68744	6.48057	33.5884	6.80978e-09	5.94392e-08	1.9758	6.48057	45.1806	1.79674e-11	1.6116e-10	0.55157	6.48057	3.89231	0.0485078	0.202961
slr0707	-1.38485	4.68845	26.3289	2.87951e-07	2.7662e-06	-1.06504	4.68845	16.2837	5.45303e-05	0.000212302	-0.468922	4.68845	3.17087	0.0749626	0.115521	0.91593	4.68845	10.404	0.00125746	0.0135818
slr0708	-1.93072	6.57153	18.548	1.65676e-05	9.72785e-05	-2.14703	6.57153	22.5699	2.02635e-06	1.10395e-05	-2.36416	6.57153	26.5967	2.50668e-07	1.24643e-06	-0.433444	6.57153	0.956468	0.328078	0.603895
slr0709	-0.84291	3.57061	3.655	0.0559011	0.106333	-1.03883	3.57061	5.44461	0.0196288	0.0386271	-1.98234	3.57061	16.063	6.12708e-05	0.0001962	-1.13943	3.57061	5.05753	0.0245192	0.126171
slr0710	0.773076	6.3362	7.0279	0.00802494	0.0212884	0.798694	6.3362	7.49879	0.00617406	0.0139897	0.26783	6.3362	0.820683	0.36498	0.444354	-0.505247	6.3362	2.96869	0.0848905	0.278987
slr0711	-0.0174218	4.79209	0.00395028	0.949885	0.9653	0.0907721	4.79209	0.107982	0.742453	0.803582	0.150207	4.79209	0.280945	0.596083	0.664703	0.167629	4.79209	0.347199	0.555703	0.785874
slr0712	0.821139	4.14308	7.96496	0.00476915	0.0136315	0.657341	4.14308	5.00229	0.0253137	0.0482357	0.434112	4.14308	1.94371	0.163266	0.225394	-0.387027	4.14308	1.70357	0.191821	0.443255
slr0713	-1.70121	4.48216	29.2256	6.44208e-08	7.41753e-07	-2.75677	4.48216	65.3366	6.31391e-16	1.89827e-14	-2.82045	4.48216	62.5438	2.60589e-15	3.96837e-14	-1.11925	4.48216	8.99996	0.00269986	0.0238867
slr0719	0.346906	6.0436	1.83605	0.175414	0.267028	0.482885	6.0436	3.56791	0.0589066	0.100299	0.409558	6.0436	2.48849	0.114682	0.167509	0.0626518	6.0436	0.0591145	0.807901	0.929765
slr0721	0.174128	4.98168	0.281198	0.595917	0.695772	0.147493	4.98168	0.20141	0.653586	0.732043	0.327909	4.98168	0.970345	0.324594	0.401967	0.153781	4.98168	0.214787	0.643041	0.844931
slr0722	-0.2714	3.24623	0.558764	0.454759	0.569018	-0.744271	3.24623	3.93476	0.0472979	0.0825678	-1.48019	3.24623	11.9724	0.000539932	0.00141498	-1.20879	3.24623	7.69245	0.00554523	0.0413917
slr0723	0.608394	4.51881	3.00472	0.0830222	0.147067	0.623057	4.51881	3.15009	0.0759229	0.124695	1.10162	4.51881	9.6624	0.00188078	0.00435894	0.49323	4.51881	2.03541	0.153672	0.393621
slr0727	-0.332085	6.44027	0.523851	0.469203	0.582825	-0.63519	6.44027	1.8959	0.168538	0.24496	-0.644908	6.44027	1.93858	0.163823	0.225874	-0.312823	6.44027	0.457258	0.498908	0.746179
slr0728	-0.830864	4.69276	6.54129	0.0105399	0.0269685	-0.760624	4.69276	5.51271	0.0188788	0.0373094	-0.837187	4.69276	6.29823	0.0120858	0.0230028	-0.00632372	4.69276	0.000340403	0.98528	0.994159
slr0729	0.604843	6.66437	5.14058	0.0233729	0.0525565	0.917665	6.66437	11.8309	0.000582545	0.00173485	0.905768	6.66437	11.3561	0.000752017	0.00190023	0.300925	6.66437	1.28876	0.256276	0.525333
slr0730	1.21969	3.52894	8.08385	0.00446615	0.0128788	2.03058	3.52894	24.2324	8.53822e-07	5.0315e-06	1.87066	3.52894	19.1513	1.20753e-05	4.38572e-05	0.650971	3.52894	2.78274	0.0952853	0.30038
slr0731	-0.227182	5.32537	0.568594	0.450818	0.564958	-0.0191083	5.32537	0.00405626	0.949218	0.962859	-0.228832	5.32537	0.553405	0.45693	0.532538	-0.00165029	5.32537	2.8627e-05	0.995731	0.997976
slr0732	-0.651722	4.80385	2.69139	0.100891	0.171806	-0.682854	4.80385	2.93598	0.0866259	0.139729	-0.912715	4.80385	5.00293	0.0253044	0.0444607	-0.260993	4.80385	0.401977	0.52607	0.76949
slr0733	-0.632368	4.36555	3.56428	0.0590354	0.111252	-0.903317	4.36555	7.04373	0.00795431	0.0173923	-1.21632	4.36555	11.5779	0.000667402	0.00170936	-0.583954	4.36555	2.56892	0.108982	0.323164
slr0734	0.0910871	3.04481	0.0369884	0.847489	0.89344	-0.385671	3.04481	0.632529	0.426429	0.526871	-0.3049	3.04481	0.370126	0.542936	0.615327	-0.395988	3.04481	0.62588	0.428871	0.698134
slr0737	-1.33035	11.0519	17.8949	2.33442e-05	0.000130687	-1.91866	11.0519	35.9522	2.02223e-09	1.93123e-08	-2.75764	11.0519	69.5805	7.33604e-17	1.44311e-15	-1.42729	11.0519	20.3989	6.28673e-06	0.000225367
slr0738	-1.22081	6.15068	20.0122	7.69489e-06	5.14101e-05	-1.85969	6.15068	43.9601	3.35131e-11	4.49657e-10	-2.59553	6.15068	75.5321	3.59512e-18	8.77695e-17	-1.37472	6.15068	21.5063	3.52662e-06	0.000146807
slr0739	-0.599885	5.58266	4.05087	0.0441485	0.0879747	-0.641166	5.58266	4.61381	0.0317155	0.0584451	-0.679692	5.58266	4.99887	0.0253638	0.0445169	-0.0798062	5.58266	0.0675603	0.794923	0.92596
slr0740	-0.306836	3.26319	0.325464	0.568342	0.670813	-0.667349	3.26319	1.50514	0.219882	0.306683	-0.545018	3.26319	0.958956	0.32745	0.405022	-0.238181	3.26319	0.179963	0.671405	0.859643
slr0741	0.0871908	4.05746	0.0638864	0.800456	0.860053	0.558214	4.05746	2.73541	0.0981462	0.154774	0.647712	4.05746	3.48074	0.0620871	0.0977202	0.560521	4.05746	2.61768	0.105679	0.318159
slr0742	-0.838431	3.96601	6.10397	0.0134879	0.0334314	-0.954527	3.96601	7.81444	0.00518304	0.0119357	-1.58305	3.96601	17.7329	2.54193e-05	8.71558e-05	-0.744622	3.96601	3.66276	0.0556414	0.222771
slr0743	-0.0248268	5.69306	0.00537942	0.941532	0.961672	-0.29432	5.69306	0.747338	0.38732	0.486134	-0.276144	5.69306	0.644339	0.422144	0.502089	-0.251317	5.69306	0.531885	0.465816	0.724893
slr0744	1.70844	10.2159	36.3216	1.67297e-09	2.72971e-08	1.95997	10.2159	47.0771	6.82469e-12	1.0165e-10	2.2807	10.2159	62.3277	2.90803e-15	4.3918e-14	0.572259	10.2159	4.296	0.0382022	0.176447
slr0746	-0.0787992	4.09245	0.050466	0.822254	0.874504	-0.256577	4.09245	0.526565	0.468055	0.567298	-0.294091	4.09245	0.647182	0.421122	0.501424	-0.215292	4.09245	0.342705	0.558272	0.788084
slr0747	0.296341	2.79918	0.491443	0.483284	0.5978	-0.560864	2.79918	1.52644	0.216648	0.303475	-0.196489	2.79918	0.180001	0.671373	0.73079	-0.49283	2.79918	1.16529	0.280371	0.553749
slr0748	-0.841343	4.97181	4.04974	0.044178	0.0879747	-0.972711	4.97181	5.37117	0.0204722	0.0401167	-0.896931	4.97181	4.48245	0.0342445	0.0581548	-0.0555881	4.97181	0.0169166	0.896516	0.961674
slr0749	-2.54762	9.41098	11.1938	0.00082069	0.00301446	-2.64135	9.41098	11.9426	0.000548638	0.0016449	-3.03287	9.41098	15.2267	9.53437e-05	0.00029372	-0.485257	9.41098	0.451881	0.501443	0.74928
slr0750	-1.66679	7.40046	9.58017	0.0019669	0.0064641	-2.68113	7.40046	22.9645	1.65023e-06	9.11276e-06	-3.65895	7.40046	38.7967	4.70317e-10	3.50257e-09	-1.99216	7.40046	13.0148	0.000309036	0.00464555
slr0751	-1.2252	4.5834	13.8745	0.000195433	0.000859018	-1.81338	4.5834	28.3813	9.96233e-08	7.07827e-07	-1.81261	4.5834	26.5513	2.56629e-07	1.27412e-06	-0.587417	4.5834	2.6485	0.103648	0.315657
slr0752	-0.889399	6.66346	11.9119	0.000557768	0.00213822	-1.36172	6.66346	26.9963	2.03843e-07	1.36752e-06	-1.43328	6.66346	28.9887	7.28034e-08	3.89444e-07	-0.543876	6.66346	4.18968	0.0406709	0.183669
slr0753	-0.682919	5.38645	5.05102	0.0246115	0.0548103	-1.50856	5.38645	22.9133	1.69475e-06	9.32688e-06	-1.21336	5.38645	14.6375	0.000130293	0.000391001	-0.53044	5.38645	2.7593	0.0966907	0.302753
slr0755	-0.238332	5.10773	0.43541	0.509346	0.620517	-0.195027	5.10773	0.291328	0.589371	0.674546	-0.274868	5.10773	0.559074	0.454633	0.530814	-0.0365361	5.10773	0.00977828	0.921229	0.972442
slr0756	-1.74027	3.34459	17.1473	3.45899e-05	0.000187815	-0.858122	3.34459	4.81586	0.028199	0.0527822	-0.429871	3.34459	1.18839	0.275655	0.350039	1.3104	3.34459	8.77518	0.00305357	0.0264399
slr0758	-0.155741	4.13068	0.32703	0.567413	0.670204	-0.269372	4.13068	0.963595	0.326283	0.423268	-0.830563	4.13068	7.4913	0.00619977	0.0127087	-0.674822	4.13068	4.81316	0.0282432	0.14174
slr0765	-1.55587	4.89381	31.0383	2.52993e-08	3.15949e-07	-1.95862	4.89381	46.6068	8.67592e-12	1.28049e-10	-2.61046	4.89381	68.6168	1.19582e-16	2.19369e-15	-1.05458	4.89381	10.3247	0.00131261	0.0140199
slr0769	-1.08388	6.71149	13.0281	0.000306848	0.00126599	-1.31384	6.71149	18.8623	1.405e-05	6.26655e-05	-1.34401	6.71149	19.3464	1.09027e-05	4.00466e-05	-0.26013	6.71149	0.730424	0.392746	0.669324
slr0770	-0.880755	4.10977	10.2285	0.00138283	0.00473635	-0.86789	4.10977	9.93179	0.00162448	0.00433062	-1.49938	4.10977	23.6299	1.16758e-06	5.08877e-06	-0.618626	4.10977	3.60537	0.0575932	0.225169
slr0771	-0.277849	3.47767	0.547495	0.459343	0.573428	-0.303383	3.47767	0.64293	0.422652	0.523199	-0.900791	3.47767	4.75472	0.029218	0.0504633	-0.622942	3.47767	2.20125	0.137899	0.370319
slr0772	-2.32692	6.90323	46.1492	1.09581e-11	2.89276e-10	-2.54058	6.90323	53.9828	2.02254e-13	4.15644e-12	-3.01924	6.90323	71.4945	2.78028e-17	5.90037e-16	-0.692315	6.90323	4.09404	0.0430347	0.190632
slr0773	-0.8405	4.42271	8.43965	0.00367126	0.0109163	-0.975838	4.42271	11.1386	0.000845503	0.00241031	-1.39016	4.42271	19.645	9.32451e-06	3.4523e-05	-0.549664	4.42271	2.86037	0.0907867	0.291001
slr0774	-1.86302	4.85674	28.9097	7.58322e-08	8.54956e-07	-2.09077	4.85674	35.2835	2.85038e-09	2.65191e-08	-2.66989	4.85674	50.154	1.42138e-12	1.42886e-11	-0.806869	4.85674	4.37652	0.0364373	0.170991
slr0775	-1.18832	6.15289	9.90669	0.00164679	0.00550117	-1.59148	6.15289	17.2317	3.30865e-05	0.000135135	-1.32482	6.15289	11.9958	0.0005332	0.00140186	-0.136501	6.15289	0.128401	0.720096	0.885238
slr0776	0.0604977	6.89118	0.055946	0.813022	0.869527	-0.157529	6.89118	0.376582	0.539438	0.633933	-0.307824	6.89118	1.40331	0.23617	0.30723	-0.368322	6.89118	2.00702	0.156573	0.397803
slr0779	0.160508	6.46043	0.115664	0.733785	0.81096	-0.175798	6.46043	0.138087	0.710191	0.778787	-0.600347	6.46043	1.58168	0.208519	0.276803	-0.760855	6.46043	2.53191	0.111565	0.326983
slr0780	-0.266661	5.43997	0.868337	0.351416	0.464975	-0.00948537	5.43997	0.00111382	0.973376	0.980625	0.0248529	5.43997	0.00740757	0.931413	0.943913	0.291514	5.43997	0.999697	0.317384	0.591927
slr0782	-0.458668	3.72293	2.03348	0.153868	0.239276	-0.648133	3.72293	3.95429	0.0467519	0.0817026	-0.947755	3.72293	7.23387	0.00715407	0.0144281	-0.489087	3.72293	1.81581	0.177813	0.42641
slr0783	-1.31425	3.9412	14.0536	0.000177672	0.000792447	-0.98625	3.9412	8.20068	0.00418746	0.00997556	-1.56728	3.9412	17.4822	2.90004e-05	9.84981e-05	-0.253029	3.9412	0.405794	0.524112	0.769275
slr0784	0.560068	7.07995	2.24802	0.133785	0.215477	0.292585	7.07995	0.614055	0.433265	0.5343	0.0394249	7.07995	0.0110607	0.916241	0.933308	-0.520643	7.07995	1.92741	0.165042	0.409391
slr0787	1.73147	5.69357	19.8376	8.43061e-06	5.49682e-05	1.95715	5.69357	25.1756	5.23404e-07	3.20659e-06	2.47582	5.69357	39.2707	3.68928e-10	2.81734e-09	0.744349	5.69357	4.08136	0.0433588	0.191293
slr0788	1.41096	3.47427	8.39211	0.00376852	0.0111646	2.00162	3.47427	17.7124	2.56941e-05	0.000108068	2.65272	3.47427	31.0949	2.45718e-08	1.41713e-07	1.24176	3.47427	8.3557	0.0038448	0.0316052
slr0789	-1.17087	5.60835	14.5111	0.000139334	0.00064082	-1.22802	5.60835	15.8351	6.91089e-05	0.000262146	-1.35492	5.60835	18.4077	1.78337e-05	6.27366e-05	-0.184053	5.60835	0.332618	0.564122	0.792011
slr0794	0.387497	4.54116	1.59948	0.205977	0.30581	0.252674	4.54116	0.668548	0.413558	0.514492	0.367456	4.54116	1.35113	0.245081	0.31679	-0.0200412	4.54116	0.00414173	0.948687	0.985335
slr0796	-0.0681222	3.92972	0.0495374	0.82387	0.875649	0.166343	3.92972	0.303758	0.581536	0.668144	0.376836	3.92972	1.48483	0.22302	0.293058	0.444958	3.92972	2.0326	0.153957	0.393621
slr0797	0.576248	5.54946	3.78356	0.0517584	0.0999759	0.128874	5.54946	0.18597	0.666292	0.742688	-0.208655	5.54946	0.460338	0.497466	0.572513	-0.784903	5.54946	6.5995	0.0102008	0.0666435
slr0798	0.773089	4.68089	6.8204	0.00901222	0.023542	0.812177	4.68089	7.53751	0.00604274	0.0137112	1.28234	4.68089	18.5251	1.67678e-05	5.91795e-05	0.509252	4.68089	3.16314	0.0753182	0.260633
slr0799	2.19858	4.05037	22.6015	1.99326e-06	1.54835e-05	2.37622	4.05037	26.4095	2.76179e-07	1.77927e-06	2.84189	4.05037	37.2712	1.02789e-09	7.22415e-09	0.643315	4.05037	2.50803	0.113267	0.330518
slr0800	0.215809	3.47287	0.13407	0.714249	0.794006	0.212539	3.47287	0.128516	0.719975	0.787125	-0.476209	3.47287	0.59432	0.440753	0.517774	-0.692018	3.47287	1.25852	0.261931	0.533556
slr0801	2.28105	4.12071	38.594	5.21784e-10	9.51817e-09	2.5606	4.12071	49.9029	1.61545e-12	2.71781e-11	2.8444	4.12071	60.2623	8.30237e-15	1.18236e-13	0.563349	4.12071	3.43347	0.0638879	0.236808
slr0804	-1.85286	5.0526	28.6574	8.63826e-08	9.50794e-07	-2.5877	5.0526	51.3061	7.903e-13	1.39462e-11	-3.19342	5.0526	67.8108	1.79957e-16	3.193e-15	-1.34056	5.0526	11.7746	0.000600447	0.00770613
slr0806	-1.57729	4.21387	28.2537	1.06413e-07	1.14412e-06	-2.60034	4.21387	64.8477	8.0916e-16	2.36697e-14	-2.59969	4.21387	57.757	2.96579e-14	3.85197e-13	-1.0224	4.21387	7.80889	0.00519897	0.0396269
slr0807	0.759985	4.01022	4.05494	0.0440423	0.0878951	0.562183	4.01022	2.19993	0.138017	0.206137	0.712323	4.01022	3.38248	0.0658928	0.102714	-0.0476625	4.01022	0.0161272	0.898946	0.962587
slr0808	0.442807	2.23535	0.634012	0.425887	0.540601	0.662437	2.23535	1.4802	0.223743	0.3118	0.556722	2.23535	0.934636	0.333661	0.411165	0.113914	2.23535	0.0415882	0.838407	0.943851
slr0809	-0.745508	4.36971	6.90882	0.00857714	0.0225689	-0.811625	4.36971	8.09019	0.00445055	0.0104945	-0.574957	4.36971	3.86448	0.0493185	0.0794331	0.170551	4.36971	0.314096	0.575177	0.798556
slr0810	1.02985	5.95561	10.3459	0.00129765	0.00448719	0.801147	5.95561	6.24151	0.012479	0.0259241	1.22823	5.95561	14.4572	0.000143383	0.000426732	0.198382	5.95561	0.397584	0.52834	0.770327
slr0812	-1.17949	2.34615	5.36509	0.0205437	0.0471749	-1.70912	2.34615	10.1197	0.00146692	0.00393969	-1.66781	2.34615	8.72627	0.00313657	0.00689535	-0.488321	2.34615	0.64262	0.422764	0.697238
slr0813	-1.79129	2.94629	20.0179	7.67193e-06	5.13624e-05	-1.42396	2.94629	13.5639	0.000230582	0.000765543	-1.10497	2.94629	7.69061	0.0055509	0.0115463	0.686326	2.94629	2.20936	0.137176	0.369328
slr0815	-0.931126	3.34828	5.6311	0.0176445	0.0416852	-0.871521	3.34828	4.97172	0.0257649	0.0489805	-1.2791	3.34828	9.08692	0.00257444	0.00579696	-0.347978	3.34828	0.606909	0.435954	0.703397
slr0816	-0.0969126	3.17824	0.0651265	0.798569	0.858879	0.427626	3.17824	1.38472	0.239298	0.329764	0.510663	3.17824	1.82219	0.177053	0.240566	0.607575	3.17824	2.50445	0.113525	0.330895
slr0817	-1.14742	3.8383	11.5987	0.000659972	0.00248344	-0.716776	3.8383	4.79252	0.0285836	0.053309	-0.922894	3.8383	7.10649	0.00768053	0.0153563	0.224527	3.8383	0.369576	0.543235	0.78048
slr0818	2.59857	7.02704	75.3367	3.96918e-18	4.44411e-16	3.02166	7.02704	99.9129	1.59251e-23	1.72363e-21	3.42279	7.02704	124.795	5.64475e-29	5.23672e-27	0.824222	7.02704	9.13417	0.00250879	0.0227941
slr0819	1.06785	4.84539	11.2978	0.000775992	0.00287631	1.3021	4.84539	16.9788	3.77991e-05	0.000152654	1.77506	4.84539	31.1027	2.44725e-08	1.41392e-07	0.707213	4.84539	5.51863	0.018815	0.105294
slr0820	0.531299	4.74479	3.05496	0.080491	0.143444	0.885126	4.74479	8.63983	0.00328892	0.00809025	0.929679	4.74479	9.12489	0.00252155	0.00569222	0.39838	4.74479	1.75648	0.185064	0.435438
slr0821	-0.473482	5.35008	1.98628	0.15873	0.245661	-0.182869	5.35008	0.301072	0.583211	0.668911	-0.476671	5.35008	1.9459	0.163029	0.225162	-0.00318813	5.35008	8.5745e-05	0.992612	0.997527
slr0822	1.32121	7.57167	25.8327	3.72322e-07	3.49402e-06	1.83914	7.57167	49.21	2.29976e-12	3.71508e-11	2.32026	7.57167	76.102	2.69391e-18	6.62661e-17	0.999051	7.57167	15.5259	8.13817e-05	0.00167245
slr0823	0.815648	5.63303	9.87123	0.00167883	0.00558522	0.767986	5.63303	8.709	0.00316642	0.00781259	0.729905	5.63303	7.58283	0.00589268	0.0121406	-0.0857429	5.63303	0.110065	0.74007	0.897649
slr0825	0.172418	5.90818	0.428691	0.512632	0.621784	0.0783146	5.90818	0.0878206	0.766966	0.823525	0.059372	5.90818	0.048967	0.824871	0.861602	-0.113046	5.90818	0.178328	0.672814	0.860428
slr0827	0.274524	7.97226	0.986441	0.320614	0.436126	0.200243	7.97226	0.524528	0.468916	0.567912	0.103119	7.97226	0.138054	0.710223	0.76589	-0.171405	7.97226	0.382052	0.536507	0.775851
slr0829	0.540431	6.92969	3.00293	0.0831139	0.147149	0.94054	6.92969	9.04788	0.00262999	0.00664042	1.1937	6.92969	14.3789	0.000149469	0.00044403	0.653264	6.92969	4.41976	0.0355251	0.169215
slr0833	-0.309608	5.3535	0.403917	0.525073	0.632386	-0.754983	5.3535	2.35622	0.124784	0.189739	-0.47244	5.3535	0.918989	0.33774	0.415081	-0.162831	5.3535	0.10889	0.741412	0.898042
slr0835	-0.817193	4.18273	6.77845	0.00922651	0.0239668	-1.21927	4.18273	14.343	0.000152349	0.000531911	-1.66501	4.18273	22.8067	1.7914e-06	7.48608e-06	-0.847816	4.18273	5.54579	0.0185252	0.104068
slr0836	-1.06131	2.8537	6.9383	0.00843691	0.0222721	-0.572294	2.8537	2.2006	0.137957	0.206137	-0.784038	2.8537	3.50725	0.0611007	0.0964014	0.277273	2.8537	0.365616	0.545404	0.780953
slr0838	0.210169	3.96083	0.447251	0.503643	0.615891	0.621642	3.96083	4.08952	0.0431498	0.0761539	0.266097	3.96083	0.659372	0.416782	0.496985	0.0559281	3.96083	0.0296287	0.863335	0.951061
slr0839	2.15418	10.8391	57.6079	3.19932e-14	1.57397e-12	2.87696	10.8391	97.3272	5.87668e-23	5.15718e-21	3.99748	10.8391	170.28	6.42724e-39	1.8972e-36	1.8433	10.8391	43.4789	4.28566e-11	1.26505e-08
slr0841	-1.20522	5.05905	11.6607	0.000638346	0.00241013	-1.0363	5.05905	8.73165	0.00312733	0.00773378	-1.51162	5.05905	17.0572	3.62706e-05	0.000121413	-0.306398	5.05905	0.682407	0.408759	0.681685
slr0842	0.187247	6.84465	0.228003	0.633009	0.727044	0.772826	6.84465	3.86106	0.049419	0.0859933	0.804975	6.84465	4.16299	0.0413163	0.068411	0.617729	6.84465	2.46712	0.116251	0.335545
slr0844	0.379772	10.0111	2.07329	0.149898	0.234902	0.288654	10.0111	1.19872	0.273578	0.369667	0.0812143	10.0111	0.0948001	0.758161	0.806791	-0.298557	10.0111	1.28003	0.257893	0.527648
slr0845	1.15255	5.04575	12.4995	0.000407066	0.00161582	1.46361	5.04575	20.3706	6.38029e-06	3.07371e-05	1.64389	5.04575	25.0577	5.56396e-07	2.57353e-06	0.49134	5.04575	2.48454	0.11497	0.333907
slr0847	-0.490101	3.2314	1.84462	0.174411	0.265749	-0.581605	3.2314	2.54418	0.110702	0.171902	-1.73306	3.2314	15.9074	6.65186e-05	0.000210924	-1.24296	3.2314	7.637	0.0057183	0.0424086
slr0848	-0.711795	4.11666	4.52822	0.0333402	0.0700231	-0.61804	4.11666	3.45756	0.062963	0.106038	-0.958259	4.11666	7.34438	0.00672727	0.0136522	-0.246464	4.11666	0.456646	0.499196	0.746265
slr0851	0.0550923	4.12724	0.0276176	0.868011	0.909931	0.286663	4.12724	0.765224	0.381699	0.480378	-0.159957	4.12724	0.209905	0.646842	0.710519	-0.215049	4.12724	0.379276	0.537991	0.776036
slr0852	0.320821	5.30203	1.28681	0.256637	0.367092	0.789729	5.30203	7.95544	0.0047943	0.0111833	0.549456	5.30203	3.67534	0.0552231	0.0880262	0.228635	5.30203	0.649492	0.420294	0.694502
slr0853	0.834435	3.51	3.36338	0.0666613	0.123263	1.36576	3.51	9.2875	0.00230723	0.0059222	0.823014	3.51	3.08409	0.0790615	0.120692	-0.0114213	3.51	0.00064128	0.979797	0.992227
slr0854	0.00131695	4.63345	1.98914e-05	0.996441	0.997978	0.172291	4.63345	0.340491	0.559546	0.650207	0.031587	4.63345	0.0106083	0.917966	0.934368	0.03027	4.63345	0.00969411	0.921568	0.972483
slr0861	0.213826	5.93018	0.439564	0.507333	0.619112	0.042123	5.93018	0.0170116	0.896227	0.926495	-0.146067	5.93018	0.198464	0.655964	0.71908	-0.359892	5.93018	1.20784	0.27176	0.546199
slr0862	-1.04231	4.26608	8.3665	0.00382202	0.0113025	-0.946252	4.26608	6.94969	0.00838337	0.0182445	-1.29774	4.26608	11.843	0.00057879	0.00150106	-0.255425	4.26608	0.431413	0.511296	0.758073
slr0863	-0.0467748	5.06465	0.0296505	0.863286	0.906562	0.137857	5.06465	0.260558	0.609737	0.691276	0.525222	5.06465	3.72726	0.0535311	0.0856234	0.571997	5.06465	4.37722	0.0364225	0.170991
slr0864	-0.60604	4.95535	4.04577	0.0442821	0.0880489	-0.531145	4.95535	3.10734	0.0779402	0.127364	-0.414222	4.95535	1.82203	0.177072	0.240566	0.191818	4.95535	0.37537	0.540092	0.777934
slr0865	-0.933063	3.16339	5.83045	0.0157511	0.0380534	-1.01197	3.16339	6.77549	0.0092418	0.0198466	-1.57138	3.16339	13.1564	0.000286541	0.000795211	-0.638321	3.16339	1.93288	0.164444	0.408831
slr0867	1.09837	2.69182	3.11785	0.0774391	0.138996	1.91784	2.69182	10.2011	0.00140355	0.00380599	2.07247	2.69182	11.4091	0.000730858	0.00185834	0.974098	2.69182	2.92513	0.08721	0.284023
slr0869	-0.845263	6.6115	7.79821	0.0052298	0.0147406	-1.08715	6.6115	12.6892	0.00036777	0.00115488	-0.777192	6.6115	6.51117	0.0107199	0.0207683	0.0680713	6.6115	0.0496151	0.823734	0.936508
slr0870	-1.27476	3.6587	5.8681	0.0154177	0.0373755	-1.2342	3.6587	5.48639	0.019165	0.0377832	-1.60351	3.6587	8.4117	0.00372813	0.00803801	-0.328746	3.6587	0.340578	0.559496	0.788491
slr0871	-1.28155	3.03166	7.3952	0.00653982	0.017826	-2.69795	3.03166	25.6551	4.08221e-07	2.53926e-06	-1.89882	3.03166	13.434	0.000247099	0.00069526	-0.617268	3.03166	1.29342	0.255418	0.524569
slr0872	0.535885	4.53345	2.85516	0.0910809	0.157644	0.417461	4.53345	1.70663	0.191423	0.273089	0.660155	4.53345	4.14895	0.0416603	0.0688402	0.124271	4.53345	0.153262	0.695438	0.874794
slr0875	-1.49807	7.0845	19.433	1.04189e-05	6.58352e-05	-1.66871	7.0845	23.7951	1.07155e-06	6.17996e-06	-1.64368	7.0845	22.8982	1.70816e-06	7.17515e-06	-0.145603	7.0845	0.184753	0.66732	0.858022
slr0876	0.461466	6.3194	3.02713	0.0818825	0.145445	0.310561	6.3194	1.36559	0.242571	0.333459	0.447724	6.3194	2.78425	0.0951954	0.142442	-0.0137421	6.3194	0.0026662	0.958819	0.987404
slr0877	-0.95747	6.01873	6.03118	0.0140554	0.0346749	-1.02351	6.01873	6.86996	0.00876566	0.0189747	-1.10287	6.01873	7.83367	0.00512819	0.0107497	-0.145395	6.01873	0.136445	0.711841	0.882273
slr0878	-1.15168	4.34613	10.9383	0.000941966	0.00339463	-1.74345	4.34613	23.467	1.27072e-06	7.18823e-06	-2.05377	4.34613	28.7857	8.0847e-08	4.28938e-07	-0.9021	4.34613	5.28432	0.0215184	0.114858
slr0879	-1.15147	3.48594	3.96878	0.0463513	0.0914475	-0.897487	3.48594	2.47188	0.1159	0.178185	-1.36645	3.48594	5.28567	0.0215016	0.0384655	-0.214979	3.48594	0.125553	0.723089	0.886657
slr0880	-1.41498	3.67616	14.3753	0.000149756	0.000683908	-2.00014	3.67616	26.3197	2.89321e-07	1.83841e-06	-1.96814	3.67616	23.2881	1.39463e-06	5.96622e-06	-0.553162	3.67616	1.64278	0.199944	0.454316
slr0881	0.903264	5.10808	7.31938	0.00682148	0.0184886	1.0619	5.10808	10.1509	0.00144233	0.00388329	0.942905	5.10808	7.73457	0.00541734	0.0112902	0.0396416	5.10808	0.0144568	0.904296	0.963332
slr0882	-1.76936	5.36872	39.8853	2.69316e-10	5.14394e-09	-1.99607	5.36872	49.0721	2.4673e-12	3.94646e-11	-2.6225	5.36872	73.4915	1.01068e-17	2.29488e-16	-0.853144	5.36872	7.40719	0.00649636	0.0473773
slr0883	-1.15508	5.44973	11.9097	0.000558431	0.00213824	-1.03084	5.44973	9.509	0.00204467	0.00532634	-1.6974	5.44973	23.6659	1.14597e-06	5.01477e-06	-0.542316	5.44973	2.39392	0.121808	0.344396
slr0884	-0.345606	6.18553	1.68542	0.194206	0.290995	-0.629152	6.18553	5.49929	0.0190242	0.0375511	-0.871687	6.18553	10.0885	0.00149194	0.00353601	-0.526081	6.18553	3.65446	0.0559193	0.223059
slr0885	1.59615	7.21544	29.4209	5.82462e-08	6.75448e-07	1.66896	7.21544	32.0444	1.50686e-08	1.23244e-07	2.01354	7.21544	45.6985	1.37927e-11	1.25448e-10	0.417393	7.21544	2.15687	0.141934	0.377135
slr0886	-0.870052	4.25518	4.63979	0.0312388	0.0662956	-1.10772	4.25518	7.34472	0.00672601	0.0150824	-0.58204	4.25518	2.02895	0.154327	0.214788	0.288012	4.25518	0.472761	0.49172	0.739858
slr0887	-1.31063	3.26927	12.826	0.000341834	0.00138569	-1.8335	3.26927	22.9355	1.67527e-06	9.23529e-06	-2.04863	3.26927	24.2999	8.24419e-07	3.7179e-06	-0.738003	3.26927	2.68823	0.101092	0.311208
slr0888	0.171203	9.57609	0.178041	0.673062	0.762538	-0.365704	9.57609	0.81	0.36812	0.466295	-0.842047	9.57609	4.23708	0.0395501	0.0658897	-1.01325	9.57609	6.09858	0.0135291	0.0824805
slr0889	-0.420071	5.7341	2.48711	0.114782	0.190249	-0.74421	5.7341	7.62193	0.00576628	0.0131298	-0.853508	5.7341	9.54623	0.0020036	0.00461397	-0.433437	5.7341	2.42939	0.11908	0.339466
slr0890	1.86145	6.30685	24.5458	7.25648e-07	6.43765e-06	1.84748	6.30685	24.1709	8.81525e-07	5.18535e-06	2.06192	6.30685	29.6329	5.22106e-08	2.84921e-07	0.200471	6.30685	0.311847	0.576549	0.798556
slr0891	0.192184	4.7412	0.329538	0.565931	0.669148	0.327086	4.7412	0.963729	0.326249	0.423268	0.47998	4.7412	2.00193	0.157099	0.217899	0.287796	4.7412	0.72731	0.393757	0.669324
slr0895	-0.687326	2.62932	2.21235	0.13691	0.219295	-0.735763	2.62932	2.51634	0.112672	0.174394	-0.0211774	2.62932	0.00210446	0.96341	0.968781	0.666149	2.62932	1.89088	0.169103	0.415339
slr0896	0.165121	3.39433	0.252141	0.615572	0.711303	-0.219842	3.39433	0.418792	0.517541	0.614026	-0.208599	3.39433	0.337229	0.561433	0.633417	-0.37372	3.39433	1.09721	0.294879	0.566216
slr0897	1.01317	6.82443	13.4429	0.000245933	0.00104113	1.52218	6.82443	30.1288	4.04287e-08	3.07428e-07	2.06318	6.82443	53.8886	2.12186e-13	2.42595e-12	1.05	6.82443	15.0495	0.000104727	0.0020609
slr0898	1.74588	5.987	14.5518	0.000136359	0.000630711	2.00416	5.987	18.9426	1.34713e-05	6.04997e-05	0.898624	5.987	3.88768	0.0486415	0.0784985	-0.847252	5.987	3.57665	0.058597	0.227275
slr0900	-0.0337612	4.34297	0.0127635	0.91005	0.939284	-0.165647	4.34297	0.301118	0.583183	0.668911	-0.197837	4.34297	0.399336	0.527432	0.601187	-0.164076	4.34297	0.272034	0.601971	0.815608
slr0901	-0.596048	3.52869	2.00441	0.156842	0.243087	-0.276151	3.52869	0.441099	0.506593	0.603635	-1.09313	3.52869	5.79843	0.0160405	0.0296603	-0.497086	3.52869	1.13915	0.285832	0.558422
slr0902	-0.514193	3.10387	1.67611	0.195442	0.292577	-0.604252	3.10387	2.25098	0.13353	0.200727	-0.624038	3.10387	2.18052	0.139768	0.198264	-0.109846	3.10387	0.0629725	0.801858	0.928132
slr0903	0.155691	2.22412	0.084509	0.771277	0.839476	-0.217202	2.22412	0.154902	0.693895	0.765311	0.230887	2.22412	0.170538	0.679634	0.738298	0.0751955	2.22412	0.018338	0.892282	0.95935
slr0904	0.463064	7.06674	2.58458	0.107909	0.181826	0.312692	7.06674	1.17632	0.278106	0.373917	0.71312	7.06674	6.06509	0.013788	0.0259533	0.250056	7.06674	0.756073	0.38456	0.661371
slr0905	-0.113906	3.49287	0.0556553	0.8135	0.86955	-0.0650895	3.49287	0.0180965	0.892989	0.924891	-0.051888	3.49287	0.0109559	0.916637	0.933308	0.0620183	3.49287	0.0153627	0.901358	0.962587
slr0906	-1.13294	12.5969	8.75693	0.00308427	0.00942997	-2.0239	12.5969	26.5679	2.5444e-07	1.65564e-06	-2.89109	12.5969	50.6655	1.0953e-12	1.12903e-11	-1.75815	12.5969	20.3811	6.34545e-06	0.000225367
slr0907	-1.73334	6.13011	25.1715	5.24516e-07	4.7706e-06	-1.69557	6.13011	24.0884	9.20112e-07	5.38947e-06	-0.937384	6.13011	7.61962	0.00577366	0.0119408	0.795959	6.13011	5.29986	0.0213271	0.114462
slr0909	-1.92538	5.02818	18.5891	1.62141e-05	9.58967e-05	-1.94635	5.02818	18.8726	1.39749e-05	6.24159e-05	-1.79061	5.02818	15.7034	7.40907e-05	0.000232213	0.134771	5.02818	0.0877817	0.767016	0.909274
slr0912	-1.3104	5.02867	16.9289	3.88061e-05	0.000207926	-1.31964	5.02867	17.0883	3.56805e-05	0.000144637	-1.22707	5.02867	14.2345	0.000161386	0.000474655	0.0833306	5.02867	0.0621534	0.803124	0.928684
slr0913	-1.48453	5.22591	15.1751	9.79855e-05	0.000475574	-2.20201	5.22591	31.0862	2.46819e-08	1.9691e-07	-2.23388	5.22591	30.6581	3.07741e-08	1.74691e-07	-0.749352	5.22591	3.47741	0.062212	0.233259
slr0914	-1.13978	4.52484	12.9483	0.000320208	0.00130946	-1.95851	4.52484	34.4741	4.31956e-09	3.90686e-08	-2.65894	4.52484	52.6183	4.05105e-13	4.39925e-12	-1.51916	4.52484	16.3503	5.26471e-05	0.00121238
slr0915	0.130853	14.8082	0.13785	0.710428	0.791885	-0.0441919	14.8082	0.0157272	0.9002	0.929101	-0.0893945	14.8082	0.0643457	0.799755	0.841479	-0.220247	14.8082	0.390272	0.532156	0.772424
slr0917	0.429966	4.83451	1.46762	0.225721	0.329846	0.144987	4.83451	0.164963	0.684628	0.758699	0.417302	4.83451	1.33852	0.247295	0.319272	-0.0126638	4.83451	0.00125373	0.971754	0.990049
slr0918	0.567449	3.99796	3.03257	0.0816086	0.145037	0.948493	3.99796	8.79817	0.00301533	0.00749102	0.548467	3.99796	2.59223	0.107389	0.158352	-0.0189825	3.99796	0.00333596	0.953942	0.985335
slr0919	0.52075	2.91207	1.23764	0.265925	0.377221	0.529905	2.91207	1.28447	0.257069	0.34979	0.117935	2.91207	0.0560061	0.812924	0.851472	-0.402815	2.91207	0.684713	0.407969	0.68095
slr0920	0.190166	2.92091	0.15881	0.690254	0.776596	0.127777	2.92091	0.0714036	0.789304	0.842015	-0.234047	2.92091	0.21173	0.645414	0.709672	-0.424213	2.92091	0.706277	0.400682	0.676204
slr0921	0.193454	3.47768	0.2981	0.585076	0.684839	-0.00694838	3.47768	0.000368008	0.984695	0.990184	-0.498478	3.47768	1.62514	0.202377	0.270085	-0.691932	3.47768	3.18224	0.0744427	0.25963
slr0922	-0.584613	4.08089	2.95981	0.085358	0.149977	-1.1601	4.08089	10.9269	0.000947798	0.0026576	-1.45519	4.08089	15.2184	9.57662e-05	0.000294742	-0.870576	4.08089	5.23033	0.0221963	0.117571
slr0923	-1.08463	6.04236	15.3323	9.01604e-05	0.00044089	-0.850536	6.04236	9.57753	0.00196974	0.00515785	-1.00764	6.04236	12.9006	0.000328468	0.000900791	0.0769974	6.04236	0.0734423	0.786389	0.921083
slr0924	-0.600207	6.98872	3.74695	0.0529039	0.101825	-0.903346	6.98872	8.38165	0.00379028	0.00917068	-0.97501	6.98872	9.60351	0.00194206	0.00448816	-0.374803	6.98872	1.42662	0.232317	0.497949
slr0925	0.685665	6.20546	6.97315	0.00827419	0.0218603	0.514596	6.20546	3.9105	0.0479853	0.0836779	0.522304	6.20546	3.92755	0.0475012	0.0770027	-0.16336	6.20546	0.39497	0.529699	0.77127
slr0926	0.568476	6.12942	3.50175	0.061304	0.114795	0.795977	6.12942	6.87829	0.0087249	0.0189117	0.878525	6.12942	8.22957	0.00412132	0.00881551	0.31005	6.12942	1.05191	0.305068	0.57792
slr0927	0.316131	12.5083	0.885442	0.346715	0.45988	0.169844	12.5083	0.255926	0.612933	0.693689	0.430043	12.5083	1.6355	0.200944	0.268393	0.113913	12.5083	0.115155	0.73435	0.894723
slr0929	-0.962086	4.24429	6.46942	0.0109746	0.0278614	-1.15582	4.24429	9.16102	0.00247224	0.00629598	-1.63345	4.24429	16.2461	5.56234e-05	0.000180429	-0.671362	4.24429	2.63628	0.104448	0.315774
slr0930	-0.817335	3.77703	5.25768	0.0218501	0.0497178	-1.12808	3.77703	9.64662	0.001897	0.00499154	-1.11237	3.77703	8.56839	0.0034205	0.00745394	-0.295033	3.77703	0.559961	0.454276	0.716732
slr0935	0.796557	6.17834	8.93136	0.00280315	0.00872659	1.18853	6.17834	19.9522	7.94025e-06	3.72428e-05	1.17431	6.17834	19.0753	1.25663e-05	4.52838e-05	0.377752	6.17834	2.07513	0.149717	0.387973
slr0936	1.18445	5.37175	13.7162	0.000212615	0.000915599	1.74267	5.37175	29.9098	4.5261e-08	3.39405e-07	1.76591	5.37175	29.9403	4.45552e-08	2.45204e-07	0.581463	5.37175	3.60322	0.0576677	0.225169
slr0937	-0.123713	6.29175	0.171475	0.678804	0.767126	0.131056	6.29175	0.193581	0.659953	0.737394	0.232056	6.29175	0.598672	0.439085	0.516562	0.355769	6.29175	1.39801	0.237057	0.503777
slr0938	-0.164339	5.12245	0.41024	0.521848	0.629435	-0.491714	5.12245	3.56448	0.0590283	0.100348	-0.4201	5.12245	2.46592	0.116339	0.169472	-0.255761	5.12245	0.900594	0.342622	0.61771
slr0940	0.495931	4.03855	2.21326	0.136829	0.219292	0.749296	4.03855	5.16753	0.0230129	0.0444514	0.681564	4.03855	3.97206	0.0462612	0.075331	0.185633	4.03855	0.309599	0.577927	0.799884
slr0941	-0.201467	3.98399	0.441346	0.506474	0.618473	-0.30874	3.98399	1.01366	0.314027	0.410713	0.0212061	3.98399	0.00464424	0.945667	0.955674	0.222673	3.98399	0.49467	0.481851	0.734541
slr0942	1.63418	7.54333	43.2289	4.86966e-11	1.13754e-09	2.03314	7.54333	65.8449	4.87837e-16	1.48038e-14	1.9957	7.54333	63.0723	1.9926e-15	3.0926e-14	0.361522	7.54333	2.2846	0.130664	0.359853
[truncated: 1,618 more rows]

## Sheet: d
supplementary file 1d: Log2FC, LogCPM, LR, Pvalue, and FDR, calucuated by edgeR lrt method (Comparison of GT and sigE∆ strain in each timepoints)
	GT vs sigE∆ at the aerobic condition					GT vs sigE∆ at the microoxic condtion 1hr					GT vs sigE∆ at the microoxic condtion 2hr
ID	logFC	logCPM	LR	PValue	FDR	logFC	logCPM	LR	PValue	FDR	logFC	logCPM	LR	PValue	FDR
rnpB	-0.481517	17.0336	2.3781	0.123047	0.700421	0.16383	17.3499	0.187317	0.665159	0.858781	0.555734	17.5868	4.48778	0.034138	0.120051
sgl0001	-0.0987027	2.39926	0.0299191	0.862674	0.974712	-0.253662	2.4402	0.264404	0.60711	0.826952	-0.803508	2.74369	3.19908	0.0736797	0.202348
sgl0002	-0.3208	5.4184	1.00463	0.316193	0.856674	-0.166104	3.89779	0.241137	0.623386	0.838936	-0.19915	3.45614	0.332868	0.563975	0.741064
sll0002	-0.137518	7.32562	0.184849	0.667239	0.936787	0.33545	8.27937	1.57574	0.209376	0.514601	0.51833	8.65253	5.76694	0.0163305	0.069164
sll0005	-0.530508	6.32988	1.63674	0.200773	0.769365	-0.620742	5.90041	5.24749	0.0219785	0.131871	-0.877482	6.42524	12.9188	0.000325291	0.00340536
sll0006	0.00966759	5.47861	0.000757461	0.978043	0.995368	-0.296186	5.04868	1.19273	0.27478	0.593085	0.0988979	5.05023	0.109278	0.740968	0.857792
sll0007	0.246207	4.85808	0.493671	0.482294	0.892395	-0.549554	4.67549	3.16005	0.0754608	0.287522	-0.253228	4.74415	0.73882	0.390039	0.597106
sll0008	0.0437625	2.81158	0.00762369	0.930422	0.984229	-0.847533	2.53116	2.23383	0.135019	0.39932	-1.04786	2.21057	5.30471	0.0212678	0.0837506
sll0016	-0.218148	5.87594	0.471638	0.492235	0.896473	-0.229456	6.05561	0.793687	0.372988	0.67609	-0.29144	6.29492	1.53174	0.215851	0.410237
sll0017	-0.387752	7.28693	1.34717	0.245773	0.809659	0.058168	5.84224	0.0502894	0.82256	0.934782	0.0810319	5.72462	0.0976084	0.754719	0.866161
sll0018	-0.749092	11.1036	4.51632	0.0335731	0.425917	-0.932018	11.2627	9.2318	0.00237848	0.0272515	-0.594318	11.2636	7.97704	0.00473745	0.0277254
sll0019	0.0665553	5.28119	0.04076	0.840002	0.971362	0.0241973	4.12958	0.00648286	0.935827	0.976071	0.265414	4.63272	0.925065	0.336149	0.542005
sll0020	-0.262657	11.1236	0.67084	0.412759	0.871705	0.103678	12.8019	0.129828	0.71861	0.884356	0.322831	13.228	2.35053	0.12524	0.290121
sll0021	0.876694	3.87131	4.61575	0.0316797	0.417512	1.21051	5.27167	16.8604	4.0233e-05	0.00114554	1.36297	5.4747	28.0394	1.18868e-07	4.14341e-06
sll0022	0.449925	5.03113	1.39641	0.237326	0.801134	0.495895	4.86427	2.7224	0.0989492	0.341619	0.665342	4.50133	7.01769	0.00807082	0.0413485
sll0023	0.454702	5.94987	1.84275	0.174628	0.758722	-0.127909	4.50636	0.170427	0.679732	0.867291	-0.324356	4.18252	1.16774	0.279866	0.482465
sll0024	-0.156847	5.8283	0.175708	0.675088	0.937206	-0.347488	5.0106	1.01509	0.313686	0.628576	-0.283052	4.13088	0.859311	0.353932	0.559656
sll0026	-0.328454	8.41285	0.905981	0.341183	0.856674	0.073469	6.64196	0.0692306	0.79246	0.916538	0.0897331	6.52629	0.147027	0.701393	0.834515
sll0027	-0.264606	7.04133	0.650229	0.420031	0.873814	-0.533376	4.48592	3.06393	0.0800477	0.299843	-0.364774	4.14262	1.84977	0.17381	0.356383
sll0031	0.182754	5.72795	0.344751	0.557099	0.910178	0.664869	4.97131	4.39659	0.036011	0.178487	0.430322	4.51284	2.04697	0.152509	0.32864
sll0033	0.423851	4.1515	0.973454	0.32382	0.856674	0.676277	3.63134	2.96836	0.0849081	0.310919	0.990036	3.92882	10.2259	0.00138485	0.0109644
sll0034	1.12743	4.28229	6.57451	0.010345	0.228819	1.13566	4.00072	9.71181	0.00183087	0.0232158	1.62477	4.13628	19.0823	1.25202e-05	0.000228242
sll0036	0.729024	4.66154	3.35729	0.0669082	0.567375	0.530744	4.47954	2.85823	0.0909077	0.324286	0.252698	4.35807	0.812237	0.36746	0.571364
sll0037	-0.0868828	5.16775	0.0608664	0.805132	0.967896	0.744045	4.90278	5.76006	0.0163946	0.108788	0.465671	4.92076	3.50511	0.0611799	0.179521
sll0038	0.00406004	7.55298	0.000150068	0.990226	0.998265	-0.363706	8.82156	2.07399	0.149829	0.42429	-0.164615	9.14874	0.570911	0.449897	0.652314
sll0039	0.111145	5.49248	0.104149	0.746906	0.955074	-0.811324	6.03788	9.326	0.00225926	0.0264557	-0.947729	6.53355	16.64	4.51888e-05	0.000720296
sll0040	0.172449	8.62033	0.135602	0.712693	0.947163	0.0912334	9.60357	0.0770528	0.781332	0.910391	0.866541	9.96298	8.48947	0.00357209	0.022248
sll0041	0.541661	7.21555	1.98411	0.158959	0.754022	-0.119518	8.19778	0.164034	0.685469	0.869121	-0.0112936	8.55329	0.00212433	0.963238	0.982765
sll0042	-0.000215768	3.67821	1.55471e-07	0.999685	0.999712	-1.18838	5.29347	15.267	9.33317e-05	0.00224857	-1.03283	5.80483	13.7699	0.000206625	0.00238333
sll0043	-0.251997	6.67725	0.645186	0.421839	0.873814	-0.306023	7.20579	1.2383	0.265799	0.579724	-0.343204	7.53608	2.56214	0.109451	0.262219
sll0044	0.284016	2.77528	0.374163	0.540744	0.90443	-1.33727	3.12668	10.0113	0.00155585	0.0207892	-1.30384	3.49232	13.0963	0.000295886	0.00316446
sll0045	0.0256698	4.2296	0.00495662	0.943873	0.987793	0.188718	4.36635	0.380542	0.537314	0.787832	-0.00633187	4.35178	0.000488416	0.982368	0.989382
sll0047	-0.84573	8.30748	4.59355	0.0320924	0.419596	-0.0946203	7.27811	0.0814372	0.775359	0.907804	-0.451479	6.69429	3.45016	0.0632455	0.183377
sll0048	0.523156	6.21867	2.1653	0.141157	0.734888	0.602314	7.99544	4.8436	0.0277488	0.151115	0.903329	8.2779	15.3027	9.15849e-05	0.00126782
sll0051	0.551806	8.72339	2.62903	0.104926	0.65259	2.07872	8.25851	54.1076	1.89804e-13	4.57281e-11	2.42045	8.05575	107.066	4.30493e-25	2.82605e-22
[truncated: 3,580 more rows]

## Sheet: e
supplementary file 1e: Log2FC, LogCPM, LR, Pvalue, and FDR, calucuated by edgeR lrt method (Comparison of GT and abrB2∆ strain in each timepoints)
[truncated: 3,383 more rows]

[truncated: 8 more sheets: f, g, h, i, j, k, l, m]
